# Supplementary material for: CANTAC-seq analysis reveals E2f1 and Otx1 as a coupled repressor-activator pair co-modulating zygotic genome activation in Xenopus tropicalis
Source: Research Square preprint supplement (doi:10.21203/rs.3.rs-4885809/v1), 2024-08-22
Supplement: Supplementary file 1 [file 843570e97d41c07b9b83bea2.xlsx]

## Sheet: Table S1
Table S1: Open chromatin regions identified using CANTAC-seq in X. tropicalis embryos
Stage 7			Stage 8			Stage 9			Stage 10			Stage 13
position	start	end	position	start	end	position	start	end	position	start	end	position	start	end
chr9	55706570	55707796	chr9	55706567	55707796	chr8	118054551	118055478	chr9	55706873	55707790	chr6	130885743	130886766
chr9	55840931	55841378	chr8	118054409	118055456	chr9	55840607	55841567	chr2	10593962	10595111	chr4	153121869	153122892
chr2	180877745	180878910	chr9	55840728	55841805	chr6	134046883	134048545	chr6	134046908	134048553	chr9	55706871	55707785
chr8	118054837	118055461	chr8	118131154	118131520	chr2	10593978	10595170	chr2	10592643	10593725	chr3	131075836	131076955
chr6	130885754	130886727	chr6	134046893	134048551	chr8	118131173	118131518	chr9	55840931	55841358	chr3	142423946	142425225
chr9	55540129	55540522	chr6	108068525	108069193	chr2	10592650	10593762	chr8	118054820	118055431	chr10	164745	166023
chr2	180881206	180881950	chr2	180878290	180878910	chr6	108068533	108069200	chr5	153779317	153780595	chr7	101217949	101221729
chr6	108068517	108069005	chr2	10592650	10593727	chr2	180878282	180878902	chr3	903238	904475	chr6	134047521	134048553
chr2	10593984	10594376	chr3	135566667	135567146	chr3	135566577	135567260	chr8	118131155	118131519	chr5	89790891	89792483
chr4	33327897	33328524	chr3	903283	904472	chr3	903303	904472	chr4	39439264	39440778	chr1	206742656	206743885
chr4	1048121	1048950	chr8	14300898	14302219	chr4	39439042	39442652	chr4	39440857	39442643	chr7	8926080	8929129
chr2	180876953	180877375	chr9	48677505	48678018	chr9	48677528	48678093	chr2	180878283	180878932	chr5	138138326	138140779
chr8	14142065	14142613	chr9	55539963	55540536	chr5	153779381	153780584	chr9	55540126	55540523	chr1	143419361	143421027
chr8	118110591	118110979	chr7	106459075	106459903	chr6	134095300	134097150	chr2	171502047	171504599	chr7	107508797	107513738
chr9	55849534	55849956	chr6	134095396	134097230	chr9	87600216	87600625	chr8	140213356	140213878	chr9	28324826	28327634
chr8	15732092	15732490	chr4	39439268	39442628	chr4	39361941	39362506	chr3	135566618	135567160	chr9	78712042	78712879
chr8	118131179	118131515	chr4	1048115	1048950	chr9	55539970	55540546	chr10	42823584	42826377	chr1	108014869	108017069
chr8	13895259	13896326	chr8	14874378	14874898	chr4	39444347	39445262	chr1	143419384	143421085	chr6	128979412	128980989
chr8	14300905	14302219	chr4	33327830	33328480	chr4	18404473	18407007	chr8	118110588	118110981	chr2	50713488	50715104
chr1	81836773	81838443	chr8	14142096	14142614	chr3	138677359	138678607	chr4	39444352	39445282	chr3	93379465	93382231
chr8	14874382	14874889	chr8	20162683	20169145	chr7	106459198	106459917	chr8	14874376	14874896	chr6	24282752	24283827
chr10	6388	13132	chr8	13895259	13896355	chr10	42823761	42826292	chr8	14300895	14302223	chr6	131731044	131732950
chr8	16756357	16757815	chr5	153779391	153780572	chr10	6375	13051	chr7	106459058	106459933	chr3	122593302	122596727
chr9	55804829	55805171	chr4	1049824	1051241	chr8	20162723	20168665	chr7	101217885	101221709	chr5	150587909	150588649
chr2	180875845	180876555	chr2	180881221	180881976	chr8	14300900	14302219	chr1	206742658	206743911	chr1	142015696	142016554
chr3	36689567	36691012	chr6	80655965	80656344	chr2	124392320	124392745	chr3	141226809	141229954	chr2	174068725	174070165
chr3	36583697	36585806	chr2	102676581	102677396	chr2	179690427	179692607	chr8	13895259	13896337	chr4	121862835	121865491
chr7	106459297	106459882	chr8	15732084	15732516	chr3	138667772	138669503	chr4	1048102	1048957	chr1	178687082	178690591
chr4	33510149	33510557	chr8	14299729	14300400	chr2	180881232	180881951	chr6	108068510	108069052	chr8	133343378	133345031
chr1	81831880	81832354	chr8	16756357	16758812	chr4	153121895	153122830	chr4	153121804	153122894	chr1	212774999	212776866
chr7	106603771	106604358	chr1	31696319	31699565	chr9	91141720	91142696	chr10	52418702	52419434	chr6	16635034	16636290
chr10	14040	16019	chr4	33512416	33514885	chr4	1048149	1048935	chr2	179690485	179692602	chr2	158738964	158742175
chr1	212271205	212274405	chr10	42823788	42826278	chr8	145088494	145090986	chr9	2667831	2668665	chr7	28139323	28141199
chr5	163995283	163995865	chr6	96092034	96092954	chr2	102676635	102677345	chr5	138138406	138140786	chr3	132711392	132714297
chr1	212275174	212277597	chr1	31694374	31695412	chr7	106448249	106450379	chr3	142423915	142425341	chr1	215915889	215917116
chr4	33513564	33514829	chr3	36689512	36691018	chr2	171502049	171504566	chr3	93379398	93382271	chr2	108592042	108593136
chr8	16406164	16406508	chr4	35074942	35075390	chr3	144849180	144849802	chr6	146835479	146837840	chr5	129499563	129503464
chr4	33326108	33327054	chr8	14569078	14570352	chr7	10978657	10979027	chr8	146497824	146498546	chr8	118131146	118131520
chr3	904099	904462	chr1	81831867	81832585	chr6	80655965	80656496	chr6	134095489	134096576	chr6	117132916	117137092
chr8	14569063	14569836	chr6	96162588	96163683	chr9	25043201	25046496	chr8	14299699	14300405	chr4	4209664	4210887
chr4	1049825	1051208	chr3	138667706	138669531	chr10	39216096	39216517	chr6	147171263	147173765	chr4	107811048	107813959
chr4	33512420	33513460	chr8	118267017	118270941	chr1	31696377	31699748	chr8	14141967	14142616	chr7	119005644	119006952
chr8	14352298	14353033	chr3	138677340	138678622	chr4	39437673	39438288	chr3	131075843	131076975	chr1	202063763	202065607
chr2	10592650	10593684	chr9	87600217	87600622	chr4	39435800	39436948	chr4	1049822	1051294	chr8	113847950	113849839
chr3	36701994	36702856	chr8	140213363	140213803	chr4	117370144	117371737	chr2	158738529	158742146	chr1	198081705	198084255
chr8	16871080	16871313	chr3	36583691	36585860	chr2	180876989	180877355	chr4	173090	174237	chr2	14115714	14117561
chr10	42824324	42824722	chr4	39444354	39445253	chr3	138758867	138759992	chr4	97513323	97517896	chr1	212827799	212829671
chr3	36589034	36591938	chr4	39437683	39438283	chr3	138745172	138746726	chr4	39361925	39362517	chr4	148013358	148014668
chr2	180880261	180881014	chr4	39361949	39362507	chr4	39532057	39532618	chr3	106834576	106838498	chr4	121656685	121657771
chr3	135566689	135567127	chr4	39435796	39436992	chr9	28324276	28328518	chr8	15732081	15732560	chr10	45143411	45144603
chr4	35074967	35075383	chr8	14352298	14352930	chr4	39359380	39359920	chr10	35745286	35747133	chr4	92463239	92465208
chr8	14780442	14781546	chr8	19618721	19621920	chr7	132855118	132855901	chr2	154158144	154161027	chr9	64902995	64904346
chr9	48677615	48678009	chr6	96159624	96162438	chr3	138670878	138671993	chr10	7610911	7612894	chr1	35410679	35411580
chr4	39439504	39440686	chr4	33509909	33510567	chr8	13895259	13896354	chr8	16756353	16757821	chr3	152594613	152596294
chr6	80655971	80656339	chr8	14780063	14781566	chr10	52418712	52419413	chr9	4383883	4386224	chr6	153282826	153283921
chr8	14285540	14286925	chr4	33326099	33327085	chr6	3180141	3182198	chr5	9556876	9559850	chr2	86661185	86662987
chr8	14927730	14929518	chr9	35467604	35469110	chr8	592264	594484	chr8	3323308	3324040	chr4	123811986	123814262
chr9	55789710	55790012	chr6	3140950	3141475	chr8	14874380	14874902	chr4	134781727	134785061	chr2	138753874	138755341
chr2	180996041	180996785	chr6	108073475	108074014	chr8	140213377	140213796	chr1	108014933	108017003	chr5	7744358	7745368
chr8	14353513	14353864	chr1	31688788	31689723	chr3	141228126	141229947	chr9	2385476	2387336	chr10	46649009	46650293
chr8	14510648	14511137	chr8	16871078	16871326	chr5	9556955	9559752	chr5	154268078	154270053	chr2	3416362	3417622
chr8	16757928	16758812	chr2	124392322	124392684	chr7	8927434	8929025	chr8	133340994	133346872	chr2	154158157	154161645
chr1	81835929	81836399	chr7	106461022	106462214	chr8	15732092	15732517	chr6	18598403	18599625	chr1	176217579	176219501
chr1	212281812	212282864	chr4	18404561	18406380	chr9	238236	239356	chr4	148013272	148014802	chr8	90614464	90615727
chr9	55547310	55547659	chr2	156506590	156509337	chr2	158738973	158742147	chr4	107810998	107813862	chr1	120366569	120367969
chr9	55836470	55836921	chr10	6369	13108	chr4	3401855	3404515	chr7	132855058	132855959	chr6	24153392	24156321
chr3	138667950	138669530	chr9	238220	239377	chr8	143009192	143010704	chr2	53391752	53393603	chr9	4383983	4386151
chr4	35029749	35030096	chr10	7611247	7612436	chr8	118101622	118102134	chr10	6102153	6103049	chr4	86738303	86741659
chr4	39440917	39442514	chr9	35473739	35474101	chr7	91567911	91569837	chr6	117132740	117137700	chr8	93087580	93089186
chr6	1170994	1171346	chr1	212275192	212277523	chr6	96159956	96163668	chr6	1170967	1173113	chr9	2385576	2387242
chr6	108073649	108073985	chr2	171502101	171504553	chr5	138138437	138140759	chr9	25311964	25313971	chr5	137894986	137898618
chr8	19619834	19621850	chr8	16406164	16406553	chr8	104402	105494	chr9	83910146	83913221	chr5	141312840	141313920
chr3	36585928	36587498	chr4	35029717	35030084	chr1	31694376	31695384	chr1	44487074	44489155	chr6	41504568	41505470
chr1	81832844	81833508	chr9	2667895	2668638	chr10	46668991	46669939	chr2	50713651	50714779	chr3	19901744	19903685
chr10	2099	6046	Sca114	1849	2303	chr8	20598513	20599829	chr4	121862193	121865481	chr4	96321905	96323694
chr8	14299729	14300393	chr2	180875371	180877356	chr6	146834719	146837783	chr7	96205149	96208720	chr2	142064306	142065474
chr6	12500265	12500634	chr4	39359425	39359951	chr8	146497813	146498535	chr4	122335488	122338393	chr3	134010530	134011875
chr8	14130066	14130410	chr3	36588569	36591868	chr3	146252314	146259318	chr9	5230057	5231647	chr1	189183493	189188042
chr2	240	603	chr4	35020911	35021381	chr8	1666009	1667058	Sca53	0	2079	chr8	50979747	50982903
chr8	16272337	16272817	chr6	96093922	96096116	chr9	2385807	2387249	chr1	6704018	6705072	chr1	188925653	188928453
chr4	35021048	35021354	chr7	91569152	91569839	chr9	4351173	4352168	chr6	24282791	24283826	chr2	121554749	121557121
chr8	20598606	20599596	chr7	106603855	106604292	chr9	7206830	7208524	chr3	153303728	153305185	chr2	136630937	136634793
chr5	163965459	163965782	chr8	14510644	14511147	chr3	106834419	106838474	chr6	24152799	24154810	chr8	103555850	103557957
Sca124	1195	1584	chr1	31690940	31691435	chr1	204775994	204776841	chr8	145386190	145387219	chr3	121284607	121287216
Sca22	9966	10314	chr7	10978661	10979022	chr3	36689599	36691023	chr1	189183321	189188142	chr3	84458711	84460151
chr4	18094902	18095954	chr3	36619115	36620353	chr5	153777054	153778380	chr3	152508306	152509263	chr8	105839771	105841439
chr8	16406852	16407336	chr6	101293600	101293929	chr4	33327909	33328423	chr1	200967335	200969946	chr3	1386804	1388593
chr1	56257345	56257979	chr10	52418818	52419466	chr7	105145391	105146266	chr6	24154906	24156323	chr3	8709374	8711344
chr10	22336	22787	chr5	153776347	153778380	chr4	33512426	33514891	chr2	147803353	147809660	chr9	25141401	25142389
chr2	124392326	124392678	Sca124	25	1584	chr6	3140970	3141590	chr8	2908327	2912416	chr4	3401905	3404527
chr3	138745168	138745772	chr8	14353511	14353870	chr6	147171342	147173794	chr1	176217596	176219384	chr4	129883537	129884752
chr6	316733	317087	chr4	117379596	117380097	chr9	5230074	5231602	chr1	203556966	203560580	chr5	150534822	150535865
chr6	134095594	134097156	chr4	39532033	39532612	chr7	8266757	8267760	chr10	46668915	46671476	chr4	7012163	7014579
chr8	20162782	20168627	chr8	14285506	14286828	chr1	56210320	56210775	chr2	180881199	180881982	chr4	123918512	123920328
chr5	163891103	163891644	chr3	138670877	138671955	chr9	56752931	56753573	chr6	153282853	153284256	chr6	21709628	21711214
chr1	31694157	31695412	chr4	153121882	153122814	chr2	145616229	145620038	chr9	4287420	4289807	chr1	191268903	191271184
chr2	102676602	102677303	chr8	139768914	139769418	chr3	131075835	131076994	chr9	4559994	4561333	chr6	7695527	7696864
chr3	151465335	151465677	chr6	3463683	3464402	chr6	4211471	4212664	chr2	100294779	100296850	chr8	145032069	145033615
chr4	5368909	5369254	chr9	4511564	4513140	chr8	1675143	1676403	chr4	136930178	136934159	chr6	31592438	31593554
chr4	34824526	34825531	chr2	156536527	156540619	chr9	2667868	2668638	chr9	19413829	19417192	chr1	187724472	187725850
chr6	18635485	18637070	chr3	138758867	138760024	chr9	2991276	2991773	chr9	2738230	2740400	chr5	128862557	128864000
chr6	154478200	154478514	chr8	14246395	14246813	chr3	152594932	152596195	chr1	142015691	142016796	chr3	144210788	144212319
chr8	16271083	16271545	chr8	118101591	118102127	chr5	162484597	162485596	chr10	48391124	48392563	chr4	11584942	11585919
chr2	102672372	102672822	chr6	3134400	3135761	chr9	5306204	5307409	chr4	129883367	129884742	chr9	25312013	25313941
chr2	181028535	181028917	chr1	9675808	9677492	chr6	1338350	1339096	chr1	12318904	12322853	chr2	122317693	122320090
chr4	33298386	33298890	chr4	117373352	117373832	chr1	178687081	178690541	chr10	1172736	1173740	chr2	151729326	151731225
Sca114	1784	2303	chr8	118265278	118266811	chr10	1172769	1173550	chr2	171751811	171754238	chr7	89585711	89588282
chr2	180998072	180998745	chr8	16271083	16271521	chr10	51714004	51714634	chr2	27026856	27029950	chr9	14410922	14412192
chr4	18405129	18405558	chr2	2016384	2016881	chr6	149130238	149131765	chr4	7011975	7014557	chr2	156901561	156903409
chr4	35035741	35036105	chr6	96155550	96156086	chr9	4383828	4386203	chr9	48677634	48678006	chr3	134209519	134211025
chr6	54360783	54361505	chr8	13896560	13898100	chr9	2995727	2996631	chr1	133479041	133483082	chr3	141087087	141088726
chr6	134046956	134047292	chr9	56752930	56753547	chr4	148013351	148014886	chr1	188924226	188928469	chr8	82315961	82317078
chr8	16521427	16521810	chr3	36585974	36587483	chr6	153941197	153942677	chr5	132515031	132517253	chr3	37660832	37663597
chr9	56752928	56753522	chr7	80821469	80827160	chr7	106461043	106462165	chr1	142010919	142011752	chr6	9437232	9440806
chr1	81802211	81803032	chr4	34824128	34825799	chr2	3416488	3417675	chr10	46139527	46141556	chr7	23919873	23921779
chr2	84995568	84995933	chr8	20598565	20599746	chr4	6957111	6959502	chr3	130717247	130719780	chr1	154086246	154088851
chr2	156538644	156540051	chr7	106460274	106460665	chr4	123918646	123920225	chr2	125070333	125072730	chr3	151280497	151283237
chr6	32859308	32859830	chr8	16406834	16407333	chr5	89790886	89792434	chr1	201983785	201985851	chr4	2404125	2405598
chr7	10978665	10978995	chr10	39216096	39216455	chr9	2563358	2564143	chr3	141230091	141233467	chr2	142220299	142222056
chr1	211668161	211668505	chr2	102672037	102673151	chr1	48794151	48797733	chr1	166341663	166344219	chr1	194875241	194875993
chr2	181004739	181005565	chr9	91141833	91142553	chr9	2389337	2390614	chr10	52015655	52016815	chr2	89308167	89310919
chr8	14638702	14639262	chr7	91571969	91573019	chr9	55836440	55836919	chr2	174068710	174070145	chr3	153303718	153305093
chr4	117371176	117371658	chr1	81836828	81837334	chr4	7012330	7014426	chr5	129499475	129503043	chr7	112434523	112436398
chr8	14863224	14863589	chr2	17132851	17136684	chr9	1809966	1812645	chr1	165494134	165496512	chr3	78316472	78318545
chr8	16733076	16733391	chr6	96152760	96155140	chr4	202575	205997	chr3	130505408	130507702	chr8	98571310	98573200
chr8	17644694	17645339	chr4	34930797	34931111	chr5	27701898	27704792	chr4	11584907	11585875	chr9	5230165	5231629
chr9	55837963	55838468	chr6	2894125	2894553	chr5	138796899	138799213	chr6	3180117	3182199	chr1	133479012	133483467
chr4	39444437	39444936	chr3	20342656	20346747	chr7	107458616	107461906	chr8	143009079	143014006	chr5	118455821	118459061
chr1	81782997	81783812	chr9	2389359	2390654	chr8	55346644	55348652	chr3	1386880	1388602	chr7	109247736	109249414
chr10	28049087	28050282	chr7	91566703	91567778	chr9	2989883	2990882	chr6	16635059	16636324	chr6	46655033	46658442
chr2	180916414	180916955	chr1	212271218	212274457	chr9	4301770	4303430	Sca124	0	1584	chr7	124522317	124523560
chr6	69	376	chr3	144849317	144849688	chr10	45248664	45252670	chr1	205229464	205230816	chr8	2588217	2589735
chr6	34605442	34605897	chr4	35012796	35013817	chr8	3323354	3323986	chr4	92463387	92465180	chr4	134781737	134785022
chr8	16403459	16404061	chr8	18130014	18132204	chr1	725314	727219	chr9	61968903	61970554	chr1	142010902	142011700
chr7	106448292	106450307	chr7	105145398	105146270	chr1	212275244	212277499	chr3	37660757	37663478	chr9	61968959	61970403
chr8	14221375	14221681	chr8	19616830	19618562	chr10	35745730	35746724	chr2	34027903	34031415	chr2	132649367	132651851
chr10	39216125	39216447	chr10	28039686	28040189	chr8	145795831	145796830	chr4	5246800	5247526	chr9	5960953	5962111
chr2	6586380	6587347	chr6	87588	89042	chr3	93379475	93381980	chr3	138677302	138678643	chr3	106834608	106838540
chr3	36619110	36620280	chr8	14089378	14089898	chr5	108035870	108038931	chr6	9887079	9891034	chr9	4301839	4303395
chr3	138670889	138671835	chr4	33527793	33528169	Sca124	0	1584	chr1	212827687	212830828	chr9	85163176	85164504
chr7	106601551	106601965	chr5	163995260	163995874	chr1	9675858	9677513	chr10	43370852	43371839	chr6	90753415	90755020
chr7	108084983	108085326	chr8	1675551	1676356	chr2	27027067	27029943	chr2	122317688	122320548	chr8	101417919	101419010
chr8	14350017	14350681	chr8	14092326	14093103	chr7	132861512	132863170	chr3	54899221	54901410	chr1	68328770	68330199
chr8	118139204	118140542	chr8	14902834	14903454	chr8	16733071	16733474	chr9	384954	386589	chr1	184194850	184196021
chr9	55533616	55533858	chr7	132855091	132855898	chr4	24552916	24553362	chr9	2563297	2564160	chr2	155701093	155703472
chr4	33277215	33279928	chr8	1664430	1667058	chr8	16756357	16758812	chr3	2310993	2312818	chr6	19259411	19261171
chr5	163956349	163956805	chr8	19609880	19610401	chr1	206742680	206743894	chr3	9389380	9390262	chr8	144785263	144786605
chr2	180921609	180922543	chr1	47385332	47387229	chr3	132711778	132714202	chr5	141312845	141313883	chr1	68902247	68903788
chr3	36677263	36678442	chr8	16272333	16272817	chr7	101217979	101221653	chr7	31958751	31960035	chr8	106044228	106046343
chr3	36700352	36700693	chr8	146497876	146498472	chr7	132792024	132793159	chr5	128042231	128043942	chr1	117272685	117273923
chr5	163957035	163957473	chr2	3012851	3014204	chr9	4287487	4289815	chr1	18293103	18293980	chr8	29620178	29620952
chr1	70351097	70351981	chr8	14927730	14929519	chr5	41659325	41671486	chr8	145032020	145033676	chr5	14366369	14367512
chr2	179691785	179692122	chr2	102721642	102722501	chr6	9599999	9602901	chr3	153760447	153762086	chr6	12719677	12722109
chr8	14923451	14924336	chr6	1741516	1744155	chr1	16940058	16944843	chr1	197935332	197936964	chr10	43370904	43371849
chr1	31689169	31689595	chr6	3838869	3839451	chr4	97513349	97517569	chr5	21223355	21226310	chr5	111723771	111725342
chr10	7611987	7612373	chr8	7884170	7884615	chr8	14142250	14142603	chr8	119935880	119937999	chr9	61025711	61028243
chr2	156507300	156507936	chr1	136955256	136955603	chr8	107693937	107698456	chr8	144160069	144162117	chr4	121048596	121052391
chr4	33236140	33236466	chr6	3180136	3182214	chr9	4560055	4561223	chr2	173876637	173878445	chr4	151678686	151679595
chr6	37052	37380	chr9	4351158	4352153	chr9	5750843	5752617	chr2	32119727	32122210	chr2	135121735	135123766
chr7	106631086	106631440	chr9	55849364	55849946	chr9	83910186	83913060	chr2	174958231	174961708	chr3	118560738	118562237
chr8	14902832	14903443	chr9	4560105	4561247	chr4	11584944	11585810	chr8	73036810	73040535	chr8	142069851	142070924
chr8	146498081	146498463	chr1	56257346	56258012	chr2	171753001	171754188	chr8	99775571	99778000	chr1	101878257	101880174
chr2	43747708	43748082	chr4	148013339	148014670	chr3	36589017	36590290	chr5	137895046	137898519	chr2	180257597	180258687
chr3	36698115	36698577	chr6	153941234	153942682	chr3	152508336	152509244	chr1	202063143	202065814	chr1	14236326	14238222
chr4	33313393	33313804	chr8	592425	594417	chr5	150534783	150535886	chr5	101065189	101071213	chr2	162400332	162401781
chr5	70363718	70364029	chr9	2385867	2387235	chr6	2538271	2539827	chr7	32993121	32994753	chr7	33241633	33243998
chr5	163896428	163896986	chr8	16733069	16733432	chr6	40330556	40332602	chr7	120072745	120075842	chr8	22632849	22635832
chr7	106461059	106461879	chr6	154245954	154247694	chr6	96092058	96092936	chr8	113847879	113849826	chr1	212945714	212947138
chr2	181010349	181010661	chr7	133565249	133565771	chr6	153185103	153186140	chr9	488751	489726	chr5	14799882	14801925
chr7	106417655	106417987	chr2	1920990	1922438	chr7	19772441	19777625	chr1	25971820	25973087	chr8	73036866	73040710
chr7	106585219	106586627	chr9	7206849	7208518	chr1	198081841	198083393	chr2	89308130	89311009	chr10	1172760	1173735
chr8	118075369	118075712	chr4	33298379	33298897	chr4	15441198	15445966	chr9	78712150	78712879	chr4	138358976	138360450
chr2	180995407	180995693	chr8	16221289	16221685	chr7	106450636	106453088	chr6	9437344	9440853	chr4	97365777	97366786
chr3	36699749	36700076	chr1	81832834	81833559	chr8	64731223	64732044	chr6	31637340	31639395	chr3	111517232	111518322
chr3	37502764	37503415	chr8	13782724	13783115	chr8	145386263	145387059	chr2	30761203	30762973	chr1	192018679	192019572
chr4	34930816	34931086	chr9	491874	493288	chr5	161417778	161418652	chr4	151678682	151679599	chr2	78348109	78350207
chr5	164033040	164033371	chr3	36698084	36698679	chr7	107509499	107511650	chr5	108035848	108038998	chr3	56045605	56047635
chr6	96092250	96092897	chr6	54360793	54361544	chr9	385023	386507	chr6	40329860	40332647	chr4	119243796	119246113
chr7	80825686	80826440	chr7	174856	175730	chr3	4758070	4760413	chr9	91141700	91142685	chr7	6367334	6368676
chr7	106460347	106460641	chr9	2995816	2996567	chr6	1741503	1744156	chr1	14236343	14238249	chr8	145298522	145300235
chr8	14600669	14601161	chr8	14815247	14815608	chr9	2772896	2774294	chr4	151708534	151709607	chr9	19212425	19213813
chr8	14894933	14895231	chr8	139770460	139770968	chr1	205229557	205230795	chr10	28486919	28489643	chr2	164628661	164630546
chr8	16173283	16173638	chr9	970003	971339	chr2	100294599	100296527	chr5	132400786	132402865	chr8	145167983	145168798
chr8	19186315	19187020	chr9	4383826	4386205	chr4	122265262	122268420	chr6	4211635	4212670	chr9	13812886	13814388
chr8	118268658	118270800	chr4	3401848	3404518	chr6	9887154	9890105	chr9	4549974	4550842	chr1	200705986	200707706
chr8	145089850	145090210	chr6	81113771	81119512	chr8	3288679	3292467	chr4	123918654	123920322	chr2	95412095	95413595
chr4	39434346	39434791	chr8	14221355	14221989	chr2	3012908	3014367	chr6	137305820	137308437	chr4	83210181	83213574
chr8	19609941	19610345	chr9	2390878	2392589	chr3	135765330	135765713	chr7	91254853	91258187	chr3	141268903	141270744
Sca27	27174	27456	chr9	53728057	53728406	chr3	153760601	153761827	chr8	14352298	14353052	chr8	98282117	98284119
chr1	47385676	47387093	chr4	134782795	134785049	chr4	39482132	39483014	chr8	14510636	14511268	chr8	98657475	98659535
chr2	31656144	31658144	chr6	12500265	12500654	chr4	151678701	151679556	chr5	162484597	162485641	chr10	35745672	35747052
chr2	180904158	180904629	chr1	56480672	56481046	chr5	162004128	162004990	chr2	3416399	3417728	chr7	124396475	124399580
chr3	36593365	36594909	chr1	212281838	212282890	chr7	174832	175763	chr2	133936598	133938789	chr1	51297845	51298891
chr3	138759222	138759877	chr9	2665033	2665678	chr7	15599389	15602629	chr5	125881373	125884033	chr6	35972675	35974936
chr3	151342261	151342603	chr9	6008885	6009532	chr7	91571952	91572997	chr6	128004060	128007041	chr9	84650719	84652742
chr4	33121709	33123154	chr3	2203448	2203790	chr9	2391112	2392759	chr7	1019942	1020833	chr1	15679343	15680234
chr5	12859921	12860249	chr5	2864863	2867627	chr1	136955264	136955601	chr7	88668546	88671285	chr1	194958901	194960003
chr6	18642162	18642524	chr6	3443804	3444460	chr3	127685514	127688783	chr9	1810030	1812733	chr8	95775014	95776287
chr7	3674234	3674591	chr4	34768154	34768884	chr2	178834060	178838080	chr4	121656597	121657808	chr1	162863731	162865713
chr7	17838122	17838387	chr7	132861520	132863186	chr2	180044213	180045282	chr5	124789688	124792498	chr10	43725345	43726690
chr7	106605965	106607194	chr8	16404303	16404959	chr5	2409779	2412288	chr6	9600017	9602922	chr3	132538929	132540842
chr7	133565258	133565606	chr9	4549977	4550769	chr5	101065203	101071292	chr9	14410665	14412077	chr4	21076842	21078922
chr8	13530303	13530974	chr6	3926274	3926806	chr5	138141058	138143292	Sca114	1375	2303	chr6	123458244	123460725
chr8	13781245	13781477	chr7	8927458	8929020	chr6	1731496	1732745	chr1	82221090	82222296	chr5	9556933	9559816
chr8	15466819	15467177	chr8	145398652	145399478	chr8	14299756	14300397	chr2	142220215	142222036	chr1	39120603	39122428
chr9	35473773	35474079	chr9	5751718	5752616	chr8	98282290	98284053	chr3	144564160	144565293	chr6	131392487	131394262
chr10	28043406	28044343	chr2	418872	419586	chr8	133340806	133346920	chr4	58768249	58769600	chr4	73155828	73157799
chr4	33290306	33290803	chr3	36685271	36688375	chr8	145032106	145033646	chr9	4351140	4352168	chr6	949717	951493
chr4	39435894	39436695	chr3	131075815	131076890	chr1	44487947	44489152	chr2	33929763	33933453	chr2	30760645	30762983
chr5	163969336	163969667	chr3	153291422	153292272	chr5	27693999	27696877	chr5	150534766	150535819	chr6	146900700	146902172
chr7	106452162	106452689	chr4	33236118	33236493	chr6	4202446	4203863	chr6	12719644	12722400	chr8	12235977	12236839
chr1	2685496	2685912	chr4	35011209	35012668	Sca53	1348	2042	chr9	4301755	4303437	chr1	84860651	84862830
chr2	31662399	31662936	chr5	9556954	9559731	chr1	48764042	48766726	chr9	5960003	5962221	chr3	146969033	146969812
chr2	180978709	180978932	chr6	1338341	1339182	chr1	56480667	56481063	chr9	83903778	83905735	chr4	153431174	153432367
chr3	48542373	48543320	chr8	13522218	13522568	chr1	81831904	81832349	chr4	5260133	5261031	chr2	133936603	133938609
chr4	24339771	24340295	chr9	1809926	1812638	chr1	202063778	202065870	chr5	136116130	136119693	chr9	88033285	88034351
chr4	33124447	33125406	chr9	4287486	4289845	chr2	11733551	11737755	chr7	112434257	112436904	chr9	88971841	88972760
chr4	35033097	35033767	chr9	5959971	5962153	chr3	2311044	2312113	chr9	88971881	88972810	chr1	195903134	195906567
chr4	117379599	117380017	chr9	35457790	35459068	chr3	142423954	142425252	chr3	139714593	139719688	chr4	129902222	129903208
chr7	3676470	3677007	chr3	36604758	36609210	chr5	162458193	162459947	chr6	23058426	23062134	chr5	20051925	20053036
chr7	106501042	106501357	chr3	153312397	153313969	chr6	108073486	108074005	chr6	25839761	25841718	chr7	106144317	106145855
chr8	14141499	14141842	chr4	18094629	18095946	chr7	7976281	7977266	chr7	101400187	101401770	chr7	22231227	22234282
chr8	15984594	15984950	chr8	14925335	14927540	chr9	966929	968527	chr8	1705995	1706985	chr7	113205084	113206015
chr8	16802234	16803883	chr8	144123850	144124848	chr9	25312044	25313988	chr8	103555489	103557934	chr2	149010304	149012168
chr8	19616902	19618494	chr2	7402525	7407538	chr5	132514891	132517227	chr7	6367310	6368629	chr5	57972634	57973295
chr9	35468237	35469048	chr6	4368258	4369958	chr7	109247867	109250804	chr2	180257621	180258627	chr10	41066643	41067585
chr1	94941190	94941634	chr10	48391141	48392547	chr1	12318933	12322648	chr8	98282276	98284117	chr3	93606138	93607444
chr2	180989658	180989945	chr3	36677162	36678473	chr10	51426622	51429117	chr8	81784537	81790659	chr6	130680208	130681813
chr3	131123561	131124604	chr3	146252317	146259964	chr3	153382885	153383807	chr9	13812845	13815104	chr3	135138712	135139542
chr8	13525140	13525438	chr4	11584953	11585836	chr6	949753	951347	chr9	88033310	88034303	chr6	25839726	25841690
chr8	37951983	37952580	chr6	32859104	32859813	chr6	3231366	3232601	chr1	212775007	212776818	chr7	12790005	12791126
chr1	31696969	31698435	chr6	96096287	96099265	chr6	23058449	23061619	chr5	73228149	73230763	chr7	99489892	99491476
chr1	33416827	33418139	chr7	17838104	17838433	chr7	133028062	133035648	chr6	33587610	33589340	chr8	146377644	146378446
chr2	180936770	180937255	chr2	17132180	17132679	chr8	706497	707458	chr1	215915941	215917132	chr10	48041252	48042522
chr3	36604843	36608233	chr6	3231404	3232579	chr8	16271064	16271543	chr2	151729161	151731245	chr3	37624997	37626540
chr3	36608298	36609062	chr9	2563336	2564124	chr8	144121748	144122526	chr4	6957060	6959567	chr7	93873225	93874605
chr3	36686609	36688328	chr1	81802191	81803079	chr9	491910	493262	chr6	152106118	152107565	chr8	137961144	137962308
chr3	36704161	36704569	chr10	14018	16034	chr9	2553719	2556614	chr2	8301529	8302737	chr3	129778451	129779192
chr3	138760643	138761089	chr3	36593295	36595130	chr9	4263551	4263982	chr4	138358913	138360595	chr6	128003996	128006927
chr4	33327367	33327685	chr5	161417770	161418652	chr9	35467594	35469083	chr5	122204318	122205102	chr9	4287504	4289456
chr4	39359456	39359743	chr7	105136977	105137751	chr10	43370915	43371816	chr8	20162686	20168663	chr9	19413852	19417173
chr4	39362033	39362485	chr8	19615383	19616310	chr2	142174872	142177879	chr8	50979778	50982885	chr2	14782687	14783661
chr5	163847476	163847761	chr8	144203721	144204845	chr3	4745392	4747578	chr9	2832838	2836087	chr3	93382586	93385391
chr5	163872466	163872739	chr9	2738219	2740365	chr7	91566720	91567650	chr1	68902208	68903531	chr9	14571526	14572442
chr5	163882491	163882705	chr9	28324351	28327495	chr1	212827786	212830780	chr2	168891937	168893596	chr2	53391300	53393763
chr5	163911608	163912299	Sca36	11334	12999	chr10	45143384	45144394	chr4	83210096	83213601	chr6	123619358	123623807
chr6	47149094	47149470	chr4	33127220	33129424	chr3	134209623	134211044	chr5	136120882	136122112	chr6	153633238	153634341
chr6	54359316	54359886	chr6	4211700	4212643	chr4	153750255	153751373	chr6	151295640	151296507	chr1	147647713	147649105
chr6	96162643	96163379	chr8	13525111	13525447	chr5	161407883	161408369	chr8	127679577	127681009	chr10	52015659	52016796
chr7	3675648	3676301	chr4	151372817	151375080	chr6	5797279	5798453	chr9	5716534	5718987	chr2	146984835	146987876
chr7	40875805	40876821	chr8	14269664	14270122	chr6	154243598	154244955	chr1	73551823	73555773	chr5	96700495	96702673
chr7	106453809	106454534	chr8	16403379	16404061	chr8	14927766	14929478	chr4	121048160	121052391	chr3	38122654	38124663
chr8	14089416	14089865	chr9	2387984	2388986	chr9	4549962	4550750	chr5	1170847	1172015	chr1	6704078	6705049
chr8	16289009	16289361	chr9	85521078	85522447	chr10	15245614	15249025	chr9	4599539	4600548	chr2	2773787	2774614
chr8	20573104	20573361	chr5	162004146	162004998	chr2	136449426	136451406	chr3	138667741	138669571	chr6	137305830	137308429
chr8	118268213	118268616	chr8	3323358	3324008	chr2	180876015	180876600	chr4	83505357	83506947	chr3	134749369	134750894
chr9	53728063	53728378	chr8	19610619	19610943	chr3	153312369	153313974	chr9	64903026	64903954	chr4	5260146	5261039
chr10	28064223	28065390	Sca22	9946	10384	chr1	73551987	73555383	chr1	153551681	153555336	chr7	117143030	117144962
chr2	102721883	102722208	Sca53	1332	2008	chr1	108014976	108016978	chr10	45143365	45144441	chr7	113221195	113223055
chr4	33515169	33515427	chr1	56210375	56210717	chr10	28039623	28040333	chr10	47934361	47936753	chr8	97278886	97280987
chr6	47695	47987	chr4	153477192	153479145	chr10	49785061	49786412	chr2	15803598	15805064	chr8	146370832	146371919
chr6	96161684	96162362	chr5	70420503	70421718	chr3	2598982	2600324	chr2	117019688	117021889	chr9	12666213	12667425
chr8	16221318	16221626	chr6	3066461	3067749	chr3	153303799	153305056	chr3	139394396	139395751	chr1	161763384	161764685
Sca36	3275	3615	chr8	2512138	2513119	chr5	8136081	8136999	chr6	123458286	123460526	chr2	173876669	173878367
chr10	19374	19873	chr8	3500286	3502904	chr5	100846512	100848709	chr7	88826460	88827511	chr3	72336994	72341656
chr10	24774480	24774812	chr8	16521325	16521818	chr5	162130369	162131120	chr8	145398599	145399531	chr3	74441681	74444037
chr10	52180291	52180623	chr9	488853	489627	chr7	80820615	80827337	chr1	101878256	101880140	chr1	147408926	147411014
chr2	2016432	2016796	chr9	2549620	2551238	chr7	128965943	128968514	chr1	147647145	147648840	chr2	100294821	100296866
chr2	180913258	180913641	chr9	55836452	55836892	chr8	145398614	145399479	chr2	138753347	138755320	chr3	84996647	84997922
chr3	36702974	36703315	chr1	134005590	134006456	chr9	2688990	2689592	chr3	2598971	2600341	chr5	124789672	124792460
chr3	151459015	151459570	chr10	24785115	24785482	chr9	4241801	4243517	chr8	468012	469232	chr5	136116113	136119748
chr5	27702312	27703830	chr2	84995548	84995898	chr9	6008869	6009511	chr9	61025806	61028215	chr1	25167566	25169250
chr5	147430718	147431691	chr3	135229954	135232449	chr4	121862318	121865445	chr9	77129659	77132481	chr4	83717086	83718751
chr5	163897485	163897812	chr6	6611478	6613473	chr8	2844338	2845124	chr1	68328802	68330161	chr6	130830453	130834305
chr6	37494	38034	chr9	2991287	2991752	chr8	14352298	14352912	chr10	45751269	45753216	chr3	51533216	51534531
chr6	47150461	47151411	chr10	51713981	51714588	chr9	53728040	53728405	chr4	39532004	39532622	chr10	46668835	46670435
chr6	75661384	75661733	chr2	158738866	158742540	chr1	621179	622023	chr4	128040893	128043078	chr3	45767605	45769087
chr7	106604756	106605190	chr8	16220540	16221115	chr1	18302497	18304721	chr6	7695534	7696866	chr8	127041841	127042757
chr8	2512188	2512458	chr9	4342845	4344019	chr1	154086384	154088246	chr8	16406161	16406580	chr1	18065675	18067930
chr8	13522236	13522518	chr4	9720482	9722293	chr10	46139575	46141471	chr6	21710067	21711178	chr2	174959725	174961735
chr8	14092676	14092997	chr5	162484605	162485582	chr10	48391130	48392595	chr1	45195677	45199105	chr4	139134054	139135292
chr8	14689448	14689754	chr6	96175775	96176178	chr2	180257693	180258614	chr10	49784978	49786436	chr6	151295690	151296542
chr8	14894257	14894532	chr8	77244468	77249885	chr3	135649201	135651388	chr3	121796051	121798677	chr2	12677792	12678584
chr8	15623986	15624578	chr1	725066	727241	chr4	151372817	151375220	chr4	113957370	113958856	chr5	33347459	33350254
chr8	38152233	38153143	chr10	46984271	46985042	chr5	161414709	161416191	chr6	153185063	153186131	chr10	45751250	45752540
chr8	38157011	38157767	chr2	180998067	180998710	chr6	24153291	24154791	chr1	167820409	167822632	chr2	104634646	104636925
chr8	143822753	143823517	chr6	1731489	1732720	chr8	50979656	50982885	chr2	135514266	135518780	chr2	168891794	168893700
chr9	970149	971176	chr6	154243661	154244981	chr9	2676005	2677589	chr2	179114928	179117379	chr3	130614898	130616635
chr9	25044292	25046236	chr7	91641465	91641995	chr9	5988298	5990603	chr7	18105296	18110323	chr7	41063157	41064598
chr9	55528528	55528852	chr8	529839	530520	chr2	14115831	14117671	chr9	4489008	4489786	chr7	92585229	92586254
chr2	180908841	180909179	chr9	2772886	2774275	chr2	125070134	125072595	chr9	5016840	5022418	chr10	48391194	48392557
chr9	25064553	25065266	Sca53	2311	2801	chr4	100854724	100857084	chr9	7206796	7208579	chr3	139394421	139395892
Sca22	7550	7878	chr6	3127346	3129456	chr5	2845655	2846756	chr1	48794166	48797706	chr4	120099444	120101539
chr1	22251471	22251790	chr6	39970892	39971959	chr6	154246101	154247681	chr2	86660945	86662645	chr5	132400835	132402817
chr1	32823709	32824501	chr8	146831555	146831960	chr8	137958538	137962284	chr3	2236049	2236722	chr6	144190437	144191256
chr1	191341964	191344290	chr9	4241784	4243791	chr1	31688783	31689919	chr7	132747568	132748729	chr8	82975338	82976697
chr1	193171101	193172626	Sca4	31732	34054	chr1	212775062	212776690	chr9	5006924	5007579	chr9	84162695	84164291
chr2	3013030	3014092	chr10	46668960	46669939	chr1	215916010	215916741	chr2	104634671	104636906	chr1	138784615	138789980
chr2	96725006	96725731	chr2	156541040	156542026	chr10	47934453	47936742	chr3	56045670	56047635	chr10	36609752	36612170
chr2	156536698	156537656	chr3	138760502	138761123	chr2	434427	435175	chr5	150890978	150892438	chr2	83644868	83646197
chr3	2203451	2203691	chr5	708735	710747	chr2	177472890	177473910	chr6	1336517	1339404	chr2	155806458	155808238
chr3	36609389	36609886	chr2	98517	102144	chr3	152357908	152359714	chr7	2940378	2942996	chr5	27701935	27704787
chr3	36610106	36612257	chr6	1347404	1348595	chr5	7744429	7745320	chr8	1675079	1676860	chr9	2766654	2768445
chr4	39315671	39315909	chr8	13882501	13882851	chr8	3144188	3145441	chr9	88580046	88581331	chr4	97513324	97517559
chr5	144075189	144076242	chr8	16804640	16805828	chr8	6247922	6249509	chr6	32454882	32455764	chr5	154268075	154269833
chr5	144076352	144077752	chr9	4301757	4303414	chr8	11033747	11034470	chr1	204603788	204605692	chr7	106735131	106737441
chr6	3838922	3839325	chr4	35010048	35010951	chr8	103555546	103557908	chr3	123119300	123120716	chr3	129585211	129586012
chr6	96094494	96095346	chr5	163844769	163846096	chr8	144203746	144204824	chr4	13689690	13690870	chr5	24277270	24278987
chr7	125383003	125383702	chr6	3234851	3235217	chr9	1822678	1824016	chr4	86738452	86741107	chr1	183081159	183082771
chr8	13514115	13514390	chr8	118148257	118149363	chr2	175655957	175656765	chr8	86772184	86774189	chr2	165859739	165861296
chr8	16404308	16404523	chr8	145386276	145386920	chr4	122335831	122338279	chr1	31434918	31436874	chr3	132219902	132222148
chr8	16804640	16805683	chr4	5368749	5369268	chr8	693217	694231	chr1	183081072	183082751	chr6	85608128	85610136
chr8	18327576	18327867	chr4	101168215	101169153	chr1	82221162	82222125	chr10	2249308	2251207	chr7	19258955	19263449
chr8	140213393	140213773	chr5	2419481	2420256	chr1	99959198	99961297	chr2	14115729	14117637	chr7	105768274	105769729
chr9	12401350	12402212	chr6	96093116	96093511	chr1	166341888	166344167	chr2	121555113	121557073	chr9	83910146	83913203
chr9	34017716	34018307	chr1	16940092	16944767	chr1	189183753	189188008	chr4	39359422	39360035	chr3	8394525	8396191
chr1	32381848	32382441	chr5	1171087	1171931	chr2	1797305	1798045	chr5	24277232	24278998	chr3	37970968	37972765
chr1	81835094	81835365	chr6	4317682	4318222	chr2	34027916	34031273	chr7	62952016	62955693	chr6	22970326	22973662
chr1	191345637	191346050	chr6	5298171	5304813	chr2	78342347	78344772	chr7	105035603	105037705	chr1	44844460	44845541
chr10	28067285	28067756	chr6	153938853	153940036	chr3	5182982	5184619	chr1	31746310	31747961	chr1	147441696	147443245
chr2	31660302	31661528	chr6	154249035	154250652	chr3	54899242	54901382	chr6	149947171	149947953	chr5	73228080	73230763
chr2	180903206	180903501	chr7	3675625	3677067	chr4	107811043	107813798	chr8	14353505	14353872	chr6	119359277	119361355
chr3	3946863	3947618	chr8	14130066	14130415	chr5	3187634	3188834	chr8	14569058	14569901	chr2	116353874	116355675
chr3	36613773	36614783	chr8	133340786	133346924	chr5	154268134	154269829	chr9	4724650	4726543	chr2	177472839	177473907
chr3	36685394	36686279	chr8	146570808	146571486	chr5	163995317	163995839	chr6	139635386	139637047	chr3	153503426	153504959
chr3	48260302	48260578	chr9	4230375	4233160	chr6	96094013	96096090	chr7	89585744	89587786	chr5	100846557	100848674
chr3	131075937	131076574	chr9	5230074	5231602	chr8	3500258	3502926	chr8	141861720	141863479	chr9	5895664	5897483
chr3	138752864	138753325	chr1	48763980	48766622	chr8	38155346	38156701	chr2	102676553	102677416	chr3	134726636	134727595
chr3	151463199	151463532	chr10	2262497	2266587	chr9	2704858	2705731	chr10	36609595	36612234	chr7	25222416	25224209
chr4	35010142	35010895	chr3	127685519	127688773	chr9	35473738	35474099	chr10	48041224	48042555	chr1	40909353	40911074
chr4	153107997	153108382	chr3	152799274	152799710	chr3	36619151	36620266	chr2	11910060	11911507	chr3	132872993	132874577
chr5	63632013	63632724	chr6	147171339	147173829	chr3	146249802	146252134	chr5	7744405	7745328	chr7	17889760	17892548
chr5	147429099	147429921	chr8	104633	105511	chr3	151280626	151283197	chr7	83125319	83129204	chr7	19774807	19777544
chr8	13953374	13953600	chr8	3288659	3292492	chr3	152616368	152617466	chr8	46469671	46471375	chr8	119284196	119285592
chr8	14335379	14335829	chr8	13530316	13531026	chr1	23305020	23305451	chr8	103095172	103097487	chr3	7498336	7499760
chr8	14815267	14815581	chr8	14894227	14894563	chr1	191446370	191448630	chr1	191268891	191271203	chr1	48794173	48797691
chr8	16845735	16846013	chr10	28080700	28081073	chr10	6102300	6102858	chr10	44561482	44562484	chr1	205229472	205230795
chr9	13316339	13317054	chr3	2037801	2039849	chr2	12567002	12568542	chr10	46894276	46895711	chr5	5981507	5982862
chr9	25056029	25057153	chr3	135235005	135235903	chr2	137663604	137665671	chr3	78316472	78318576	chr8	145795797	145796910
			chr4	39482155	39483014	chr2	179485720	179486862	chr5	18002816	18004441	chr2	1861615	1863740
			chr4	151708639	151709563	chr3	1387059	1388600	chr6	140360916	140362165	chr3	132855027	132857227
			chr6	18635144	18637276	chr3	4738210	4739678	chr8	47146069	47147578	chr4	127218102	127222235
			chr6	66118640	66119010	chr3	141231787	141233426	chr8	144785295	144786557	chr7	40995990	40997574
			chr8	19833534	19834208	chr3	153630230	153631124	chr9	5988274	5991065	chr1	150085446	150087038
			chr8	118139147	118140551	chr4	35074940	35075387	chr6	154309235	154312531	chr4	138164257	138166786
			chr10	28036452	28036836	chr5	2862971	2867645	chr2	16664368	16666360	chr4	141845965	141850038
			chr10	49809478	49810543	chr5	96569954	96572122	chr2	133683370	133686690	chr9	18943615	18945383
			chr10	51505107	51507214	chr6	1347375	1348593	chr3	37624593	37626520	chr9	88580051	88581322
			chr2	1485334	1488358	chr6	4854042	4855441	chr3	56473888	56475617	chr2	117019611	117021764
			chr2	1499264	1501649	chr6	6467554	6468737	chr3	127685422	127688806	chr6	131166334	131167892
			chr3	5461585	5463133	chr6	7125561	7126716	chr4	14342452	14346287	chr2	175580734	175581507
			chr4	17637088	17638422	chr6	31637354	31639631	chr5	2419439	2420309	chr6	96992374	96993503
			chr4	24552901	24553351	chr6	49692946	49695515	chr5	75905162	75909734	chr8	10558937	10560179
			chr4	39353102	39354015	chr6	96155551	96156072	chr5	138566959	138568146	chr9	67319763	67321129
			chr6	5794947	5796342	chr7	106453311	106454562	chr6	949749	951442	chr5	52928319	52929556
			chr6	34605399	34605916	chr7	106603881	106604256	chr6	21482325	21486220	chr6	149947176	149947989
			chr7	106462427	106463258	chr8	597648	598427	chr6	95068661	95073901	chr7	6241227	6242165
			Sca36	3267	4014	chr8	1664447	1665851	chr8	13896556	13898105	chr1	139862168	139862961
			Sca36	13524	14462	chr9	4342860	4344017	chr9	5612179	5612794	chr10	47934402	47936707
			chr10	827908	828499	chr9	4489026	4489745	chr1	120366260	120368292	chr2	136449348	136451455
			chr2	181010339	181010674	chr9	4716042	4716810	chr2	12637234	12639206	chr4	108213939	108216240
			chr3	93379365	93382262	chr1	212271194	212274440	chr4	21076898	21079567	chr4	125699582	125702819
			chr3	135766063	135771419	chr2	14139030	14140053	chr8	82573394	82576797	chr5	8329038	8329840
			chr3	144639944	144641902	chr5	5937028	5938582	chr8	146370796	146371839	chr8	144253173	144254093
			chr3	153353828	153354417	chr6	24282754	24283744	chr3	153630231	153631307	chr2	149987007	149988818
			chr5	48392030	48392466	chr9	3831897	3832647	chr4	151372755	151375241	chr7	29020262	29021863
			chr7	106417576	106418001	chr9	77129756	77132471	chr8	3307848	3309922	chr8	693208	694231
			chr8	14350020	14350695	chr1	204603788	204605617	chr1	15679326	15680193	chr6	122572012	122573147
			chr8	144094108	144095388	chr1	212901764	212902597	chr1	174674084	174677092	chr1	166342039	166344267
			chr8	145407036	145407894	chr10	10637995	10639615	chr1	212945686	212947227	chr2	158267908	158268978
			chr9	2439337	2440261	chr2	104805551	104806580	chr2	123388808	123391672	chr6	8245515	8246910
			chr9	2553712	2556511	chr2	117019735	117021673	chr2	127158995	127162289	chr1	45212550	45214296
			chr9	2704868	2705731	chr3	139065019	139068558	chr3	4757968	4760799	chr10	10890393	10891952
			chr9	2989936	2990789	chr3	141268972	141271390	chr3	19901793	19903803	chr3	39864844	39866235
			chr9	4753274	4754311	chr4	2403315	2405808	chr3	117251499	117252325	chr5	125143805	125145556
			chr9	4844905	4845751	chr5	143341832	143344617	chr3	119256771	119260159	chr9	52480859	52482305
			chr9	5016827	5022366	chr6	5205595	5206130	chr4	139115707	139119038	chr1	176675911	176677667
			chr1	941190	942337	chr6	6728939	6730260	chr4	153431206	153432381	chr3	130505461	130507659
			chr3	5186082	5187636	chr6	117517709	117518932	chr5	125311198	125314850	chr3	138830052	138831232
			chr3	140615905	140625193	chr6	153282909	153284117	chr5	125676106	125678216	chr4	13689700	13690854
			chr5	41659223	41667974	chr9	5223805	5227573	chr6	2538256	2539826	chr6	149130044	149131821
			chr8	3281956	3283970	chr1	183966817	183968335	chr6	118508875	118511720	chr9	68097993	68099239
			chr9	2729520	2730628	chr10	50558186	50559528	chr7	114387869	114390890	chr2	127306112	127307251
			chr9	2895617	2898600	chr4	13689780	13690806	chr8	1664374	1667059	chr5	161943371	161944082
			chr9	5191280	5192195	chr6	151295677	151296411	chr8	145088521	145092192	chr1	45196287	45199072
			chr1	176217618	176219580	chr8	139768801	139769503	chr9	5353306	5357731	chr1	162690752	162692926
			chr10	51712015	51712551	chr9	4724631	4726455	chr1	194926868	194928262	chr8	46521937	46522876
			chr3	9402663	9405140	chr1	153551683	153555309	chr10	2401559	2402788	chr9	4489008	4489782
			chr6	548786	550522	chr10	164795	167504	chr10	46648971	46650424	chr10	2249625	2251139
			chr6	4363997	4364749	chr2	178841433	178842233	chr3	64762914	64766233	chr2	1074056	1075081
			chr6	5247235	5248684	chr3	5461538	5463166	chr3	74441752	74445124	chr6	32454826	32455667
			chr8	14638704	14639260	chr3	5573592	5574506	chr5	13534232	13535264	chr8	114966809	114967967
			chr8	36142860	36145232	chr3	37660777	37663419	chr6	33925113	33927812	chr1	102932920	102934406
			chr8	55346397	55348686	chr3	139714522	139719638	chr6	120357449	120358718	chr4	127207890	127209655
			chr8	141436804	141437528	chr4	91724114	91728624	chr7	81233432	81236491	chr6	140243328	140245519
			chr8	146833874	146835456	chr5	6577136	6578054	chr8	507644	508249	chr8	2646387	2647650
			chr9	4243992	4245233	chr5	125719641	125721920	chr1	166665176	166668925	chr1	152829439	152831140
			chr9	55533591	55533869	chr6	5746415	5748134	chr2	165859802	165861594	chr10	11736449	11737876
			chr10	46977870	46979708	chr6	5831467	5833430	chr3	63196077	63196692	chr8	144715192	144716122
			chr3	153293308	153294861	chr8	1228793	1230734	chr3	138972082	138974125	chr1	194926912	194928313
			chr4	153480704	153481573	chr8	1706166	1706973	chr4	148721490	148722521	chr10	17456798	17460011
			chr5	6007139	6008630	chr8	71278052	71280156	chr5	8136018	8137230	chr4	115378536	115379597
			chr5	164033039	164033374	chr9	488865	489636	chr8	2959701	2961176	chr4	133054214	133055501
			chr6	9598999	9602844	chr9	5996405	5997330	chr8	90614614	90615740	chr7	88666194	88668550
			chr6	140361032	140362120	chr9	7977538	7978023	chr9	4241800	4243540	chr9	21253129	21254444
			chr6	147168752	147170905	chr9	65656354	65657867	chr9	12612769	12614452	chr1	106489295	106491099
			chr6	153952109	153953450	chr9	90259044	90260302	chr5	2862983	2867781	chr2	33975762	33978094
			chr8	1669288	1669746	chr10	46894298	46895631	chr7	128883880	128885050	chr2	117058436	117062981
			chr8	143009176	143010221	chr2	7402522	7407565	chr2	78342255	78344832	chr2	149937462	149940335
			chr9	4599554	4600505	chr3	84458938	84460774	chr2	125066601	125069459	chr2	157717649	157719877
			chr9	56710054	56710377	chr6	3463696	3464258	chr3	141268882	141271497	chr3	127685569	127688617
			chr1	18302472	18304807	chr7	9826964	9828105	chr6	22870809	22874729	chr3	140488082	140489668
			chr1	23304975	23305442	chr7	111144829	111146406	chr8	58154049	58156836	chr5	24253604	24255924
			chr1	99945314	99958989	chr8	1768335	1769449	chr8	82315994	82317050	chr8	46469605	46471797
			chr10	6102302	6102855	chr9	965439	966077	chr9	13723874	13727352	chr9	488787	489715
			chr2	1598995	1600972	chr9	2665014	2665676	chr1	76936965	76937667	chr9	13592129	13594505
			chr2	3416488	3417655	chr9	61025693	61028168	chr10	43871855	43874947	chr10	49694119	49695696
			chr2	156455901	156460344	chr10	51907395	51907957	chr2	142174789	142177971	chr2	121739391	121741212
			chr2	180904161	180904957	chr2	111465458	111468147	chr3	7750048	7751540	chr2	125070331	125072588
			chr4	6957151	6959457	chr2	138753423	138755249	chr5	5730524	5732015	chr3	50272827	50274249
			chr4	24535163	24536280	chr2	146984803	146987973	chr5	137440293	137447561	chr3	121795943	121798683
			chr4	33515142	33515442	chr3	20342760	20346621	chr6	20642202	20645026	chr3	150945505	150946368
			chr4	35037159	35038506	chr3	121284559	121287081	chr7	114570347	114574205	chr7	18105293	18110180
			chr6	5202057	5203177	chr3	140457834	140458556	chr7	131535956	131537971	chr8	119935893	119937597
			chr6	153958913	153961565	chr3	145682154	145683458	chr9	7130908	7134468	chr1	136235987	136237299
			chr7	1073467	1075356	chr4	115110605	115114212	chr4	152371154	152372974	chr10	46894923	46895739
			chr8	118067553	118068480	chr4	147992813	147995011	chr1	16946082	16947311	chr7	1019841	1020810
			chr9	385057	386517	chr5	16788294	16789532	chr2	135121761	135123751	chr7	128883883	128885014
			chr9	2059395	2065590	chr5	124789859	124792426	chr2	155079734	155081039	chr8	104790622	104791629
			chr9	2338905	2339451	chr5	136117968	136119626	chr2	175580776	175581579	chr2	149911447	149913478
			chr9	2556817	2557332	chr5	143224346	143230882	chr3	84459021	84460792	chr3	96586095	96588218
			chr1	9723869	9726271	chr6	152142408	152144074	chr4	108213922	108216063	chr3	126270322	126274278
			chr2	1591907	1593626	chr8	16272332	16272815	chr6	130680252	130681988	chr4	151708603	151709622
			chr3	2218921	2220552	chr8	141326713	141327863	chr7	106448269	106450459	chr5	154207718	154208699
			chr3	125125226	125130738	chr8	142651160	142652740	chr8	132470471	132475559	chr6	23059007	23062246
			chr3	152591602	152592806	chr9	464678	465287	chr8	146793511	146795022	chr6	140360903	140362095
			chr4	151678783	151679524	chr9	970012	971336	chr2	169401400	169403553	chr7	105035593	105037418
			chr5	138141057	138143252	chr9	2895532	2898612	chr1	167458469	167459856	chr9	2739246	2740386
			chr6	1170979	1173065	chr9	4599515	4600521	chr1	194875310	194875969	chr1	31585500	31587211
			chr6	32073795	32075272	chr9	83903861	83905679	chr2	1617170	1617976	chr2	78145186	78146939
			chr8	19612443	19613049	chr1	176217605	176219573	chr7	132791946	132793215	chr5	93094814	93096273
			chr8	137291887	137293416	chr10	45542846	45544082	chr8	100782748	100785673	chr4	173139	174159
			chr8	145902578	145903037	chr10	51509846	51510610	chr2	162400880	162401679	chr5	116207609	116209082
			chr9	965389	966068	chr2	587149	588292	chr1	39120616	39122521	chr8	128524976	128526721
			chr9	2461590	2465830	chr4	96320905	96323682	chr1	194959149	194960039	chr8	83794736	83795777
			chr2	2904396	2904916	chr5	137895055	137898436	chr3	46181170	46182481	chr2	168414611	168416619
			chr3	4752540	4755825	chr6	4474964	4475599	chr3	132769667	132774675	chr4	4196343	4197377
			chr3	132712021	132714219	chr7	131678649	131680360	chr4	128066570	128068758	chr8	1728010	1730283
			chr3	140438463	140439900	chr8	96600203	96601589	chr6	19259182	19261183	chr5	123623637	123627026
			chr3	152508361	152509212	chr1	101878215	101879995	chr6	99150780	99153193	chr7	131375855	131377041
			chr3	152618919	152623012	chr10	2262622	2266585	chr7	33241764	33244312	chr7	132861517	132863200
			chr4	33332155	33332484	chr2	1633372	1634321	chr8	96599149	96601601	chr10	2656112	2656931
			chr4	82712718	82713123	chr2	133936635	133938604	chr8	141326624	141327922	chr10	7366130	7368227
			chr4	97513331	97517569	chr2	137527583	137529403	chr1	146143654	146146007	chr2	41437682	41439314
			chr4	147168769	147171082	chr2	142220191	142221995	chr3	111517302	111518231	chr2	98000086	98002187
			chr5	520263	520791	chr3	9377742	9380472	chr3	132872939	132874635	chr6	126550967	126553558
			chr5	1408220	1409701	chr3	135176776	135177497	chr3	140488169	140489671	chr7	9564495	9566061
			chr5	163872436	163872765	chr4	117379648	117380099	chr4	100843249	100844262	chr8	37277599	37278846
			chr6	3176963	3178751	chr4	153477192	153479142	chr6	41504642	41505377	chr1	162023706	162026188
			chr8	597654	598451	chr5	1171070	1171966	chr6	144190410	144191090	chr1	110088691	110090497
			chr8	14244904	14245450	chr6	6611439	6613507	chr7	3546620	3547406	chr2	10593978	10594390
			chr8	44064267	44069738	chr6	22871538	22873888	chr7	117683345	117684866	chr3	93934064	93935981
			chr8	146601563	146602136	chr7	4815080	4817045	chr8	2846868	2849031	chr4	5246781	5247465
			chr9	2065741	2066174	chr7	17838083	17838413	chr8	146684069	146685171	chr4	83927052	83928367
			chr9	2559950	2562897	chr8	1173342	1174446	chr10	10637126	10639717	chr5	5730689	5732015
			Sca4	37550	38931	chr8	97522389	97524288	chr6	368793	369742	chr8	115584180	115585376
			chr1	205229648	205230768	Sca36	16685	18207	chr8	80089441	80090249	chr1	6728234	6729019
			chr1	206742701	206743897	chr1	6704072	6704966	chr1	162232671	162235796	chr1	113758020	113759826
			chr2	1502076	1502779	chr1	183081052	183082716	chr2	1074079	1075059	chr10	46867321	46868377
			chr3	106834601	106838256	chr10	46977831	46979688	chr3	93382963	93385531	chr3	7750108	7751536
			chr3	138751496	138752359	chr3	7750093	7751364	chr8	144121696	144122626	chr3	114681297	114682644
			chr4	122265265	122268429	chr4	105535577	105537959	chr9	5894849	5897553	chr1	185618842	185620750
			chr5	161407918	161408353	chr5	5730668	5731985	chr10	41029146	41030199	chr2	145586312	145587632
			chr6	5823124	5823942	chr5	8257598	8258988	chr10	50558137	50559562	chr1	129852638	129855298
			chr6	153211254	153212038	chr6	1336621	1337297	chr2	89391905	89394153	chr1	204603761	204605685
			chr8	118082615	118084207	chr6	4408484	4409687	chr3	125333431	125335278	chr2	27027068	27029939
			chr8	142641409	142642598	chr6	130657213	130658647	chr3	126270353	126274315	chr6	152287045	152288233
			chr8	145795854	145796804	chr7	84190508	84193222	chr4	115110504	115114222	chr7	110531874	110534130
			chr1	731121	733175	chr7	131882690	131884050	chr5	162433012	162435951	chr8	86766954	86767753
			chr10	21723315	21724695	chr8	106043991	106046329	chr6	12273162	12274496	chr8	138352628	138353767
			chr10	35745761	35746720	chr8	144976473	144978623	chr6	126551023	126553561	chr4	36310939	36312964
			chr10	49815219	49816077	chr8	145072164	145073082	chr8	2588194	2589823	chr8	76957713	76959091
			chr2	46145362	46147192	chr9	77111037	77111692	chr8	2873069	2873697	chr8	87091734	87094072
			chr2	120791621	120794403	chr1	31690950	31691435	chr7	92585201	92586238	chr9	21430382	21431597
			chr2	122317569	122320465	chr1	133479108	133482966	chr8	693195	694424	chr1	36221191	36222549
			chr2	156528908	156529896	chr10	43725391	43726336	chr1	24430566	24431965	chr1	55521000	55524365
			chr2	171752994	171754141	chr10	51551237	51552289	chr10	33154635	33156210	chr3	49338365	49339483
			chr3	30664346	30665977	chr2	27684220	27686262	chr2	434384	435240	chr5	108035843	108038991
			chr3	37502436	37503422	chr2	78349090	78350096	chr2	136449349	136451448	chr3	105263613	105265679
			chr3	135243928	135246263	chr2	90790444	90794116	chr2	142064280	142065437	chr5	129562077	129563433
			chr4	35033089	35033815	chr2	133681975	133686694	chr5	139571591	139574898	chr8	73956029	73957142
			chr4	82713762	82714145	chr2	141039298	141042406	chr8	144735647	144736374	chr1	65989612	65990977
			chr5	1184917	1185983	chr3	5011325	5012686	chr9	2895600	2898607	chr1	174674396	174677120
			chr5	2845655	2846743	chr3	36602315	36603661	chr1	154086445	154088488	chr2	73812564	73813750
			chr5	3187704	3188834	chr3	121796347	121798674	chr1	152856064	152859514	chr4	6957581	6959736
			chr6	6434225	6438413	chr3	144638495	144639799	chr5	162081191	162082747	chr4	97215862	97217142
			chr6	117132897	117137095	chr3	153503522	153505135	chr8	1238505	1240872	chr5	2778372	2779338
			chr6	153633242	153634258	chr4	33510154	33510565	chr3	105264354	105265627	chr6	3180174	3182273
			chr6	153965191	153966029	chr5	21223395	21227103	chr5	82590607	82593260	chr6	9887068	9888539
			chr7	133198629	133200800	chr6	4426040	4427374	chr1	40908319	40911278	chr8	47146219	47147633
			chr8	13463905	13464243	chr6	4782446	4783003	chr10	43725337	43726776	chr9	59381661	59384936
			chr8	16847657	16848334	chr6	35972797	35974392	chr2	149010127	149012251	chr1	148761837	148763761
			chr8	146684081	146685156	chr6	131395998	131397056	chr2	157717653	157720147	chr3	153760452	153762030
			chr9	88096774	88098059	chr6	140361032	140362136	chr3	135176719	135177513	chr7	110780816	110782935
			chr1	157776670	157778842	chr7	88668669	88671182	chr4	153480629	153481651	chr8	86961562	86963427
			chr10	979802	981652	chr8	3136604	3138547	chr5	104	1334	chr8	128696540	128698342
			chr2	587142	588292	chr8	3294583	3295217	chr6	118605186	118607674	chr1	17894807	17896395
			chr2	31662394	31662931	chr8	51239063	51241043	chr6	123656827	123662000	chr4	143629175	143630411
			chr2	77694833	77699045	chr8	79882487	79885653	chr8	3136402	3139050	chr5	133904536	133906032
			chr2	179086828	179087746	chr8	144084667	144085477	chr8	16406832	16407358	chr7	65994644	65995630
			chr3	144906061	144906860	chr8	146684081	146685122	chr8	105839771	105841369	chr7	83125414	83128081
			chr4	2317848	2319482	chr9	2455248	2457648	chr8	114731010	114732558	chr7	104933652	104935804
			chr4	17359735	17360714	chr9	2549608	2551248	chr9	5371953	5372775	chr9	20604376	20605603
			chr6	866658	867552	chr9	4346050	4349762	chr2	175655885	175656733	chr2	434384	435233
			chr6	5094558	5098960	chr10	46667400	46668106	Sca85	1825	3087	chr3	99906521	99908212
			chr8	145405935	145406827	chr2	77695409	77699016	chr1	621154	622087	chr9	21620007	21621612
			chr8	146541635	146542526	chr2	174882686	174883901	chr1	116012178	116012982	chr2	126736573	126738278
			chr1	931964	934684	chr3	46540460	46541486	chr2	152911911	152913317	chr3	122484057	122485468
			chr10	28072343	28073284	chr3	132219434	132221391	chr3	4738160	4739746	chr4	148083972	148085598
			chr2	1662133	1664182	chr3	135663524	135663948	chr4	96170163	96173173	chr5	133567233	133572732
			chr3	1387076	1388594	chr6	95069190	95073791	chr6	12621200	12625507	chr5	162130333	162131174
			chr3	138654047	138656522	chr6	123458291	123460560	chr8	88620064	88621357	chr6	57560189	57562112
			chr3	138673997	138675334	chr6	128004067	128006188	chr9	2751385	2752202	chr7	127498343	127500481
			chr3	138752907	138753325	chr8	536453	538201	chr9	4256312	4257222	chr8	34840398	34841467
			chr3	151085462	151087610	chr8	144094072	144095784	chr9	67261330	67263763	chr2	21784577	21785842
			chr3	153378129	153378756	chr9	4244032	4245215	chr9	84457784	84459146	chr3	125333395	125335484
			chr3	153382808	153383777	chr9	22559122	22560322	chr1	146204964	146206046	chr5	125387076	125388184
			chr4	9651634	9652003	chr10	2249643	2250541	chr10	50779746	50782870	chr10	36493682	36495160
			chr4	19779787	19780301	chr10	44561477	44562403	chr8	1234974	1235888	chr3	100582746	100584751
			chr5	9561038	9562601	chr10	46649031	46650239	chr1	204775992	204777716	chr3	128053740	128056043
			chr6	368838	369732	chr10	52015687	52016783	chr3	144343825	144346133	chr5	45220695	45221998
			chr6	4408475	4409638	chr10	52424040	52424654	chr5	152480660	152482653	chr6	140575108	140576601
			chr6	9887146	9890102	chr2	77455192	77456353	chr5	161943346	161944118	chr7	38787728	38789760
			chr6	151285749	151287968	chr2	122317749	122320598	chr6	153330846	153333216	chr7	65759017	65760238
			chr7	12407298	12407784	chr2	123388886	123391563	chr7	6241166	6242135	chr9	62136656	62139246
			chr7	101218072	101221649	chr2	156540884	156542051	chr7	9553194	9554258	chr1	127726843	127729848
			chr7	131880430	131881255	chr3	1361917	1363921	chr7	133030261	133036025	chr2	43848652	43850042
			chr8	281070	282147	chr3	84267228	84270559	chr8	98823310	98826026	chr2	92901304	92902794
			chr8	3293311	3295111	chr3	121948084	121949893	chr8	110835575	110837328	chr3	5011345	5012466
			chr8	14862072	14862981	chr3	135234361	135235905	chr9	4263552	4264046	chr5	14341514	14343880
			chr8	16001531	16001907	chr3	153293323	153294861	chr9	67319782	67321108	chr5	125676108	125678201
			chr8	118075370	118075713	chr4	83210092	83213507	chr9	19212443	19213834	chr5	153779318	153780339
			chr8	145032127	145033581	chr4	123811692	123814006	chr1	48763929	48765801	chr2	90366256	90367521
			chr9	5698107	5700208	chr6	3474848	3476101	chr1	192018736	192019610	chr3	42557424	42559563
			chr9	83910196	83913132	chr6	4970859	4972068	chr2	12566971	12568621	chr3	59167233	59168494
			chr1	212850200	212851461	chr7	2658627	2660787	chr2	53710142	53711674	chr4	1098169	1099335
			chr2	156583	158025	chr7	6367415	6368573	chr2	132649236	132652463	chr6	91773365	91774938
			chr2	1595358	1597707	chr7	17889640	17893304	chr2	180876937	180877378	chr6	128128788	128130730
			chr2	156534998	156536116	chr7	73235297	73237686	chr3	9351694	9352690	chr2	164688946	164690901
			chr3	2031994	2032726	chr8	522377	523000	chr4	48789043	48791170	chr3	123118206	123121247
			chr3	152355770	152356959	chr8	1239232	1240754	chr6	1731460	1732769	chr6	31765110	31766255
			chr4	153474981	153476576	chr8	7884047	7884573	chr8	3144122	3145477	chr2	115841225	115842882
			chr6	949751	951344	chr8	16871085	16871321	chr8	14285496	14286958	chr2	33929927	33933306
			chr6	1390608	1392002	chr8	131390116	131393038	chr8	145952165	145953772	chr3	22970374	22971466
			chr6	152070538	152072055	chr8	143553072	143553714	chr9	4753216	4754311	chr3	118294843	118296521
			chr7	23919814	23921776	chr9	4353350	4357120	chr1	102932807	102934364	chr4	115433249	115435402
			chr7	25652615	25654677	chr9	5324461	5326761	chr10	11736483	11737945	chr4	133335668	133338351
			chr7	51359159	51359728	chr9	5334216	5335403	chr2	108591909	108593024	chr5	85093495	85095577
			chr8	577424	578869	Sca22	9949	10342	chr2	177472758	177474047	chr5	129009210	129010378
			chr8	1219259	1220788	chr1	191269000	191271139	chr3	9377651	9380489	chr5	154480373	154481134
			chr8	3210824	3213837	chr3	74487479	74492535	chr4	135413809	135416189	chr6	120372442	120374391
			chr8	15984610	15984950	chr3	140488197	140489565	chr7	119938060	119939757	chr7	9976062	9978169
			chr9	464678	465308	chr3	153309048	153310482	chr7	132742220	132743979	chr7	117299613	117300724
			chr9	2399245	2401283	chr4	111642887	111645795	chr8	3113752	3117123	chr9	63576113	63577541
			chr9	4716125	4716756	chr4	143629185	143630352	chr6	39966325	39968511	chr1	38880960	38882256
			chr9	65656349	65657879	chr4	151725967	151729129	chr7	41502104	41502866	chr1	165240768	165242393
			Sca36	16677	18163	chr5	8056845	8057566	chr9	21253038	21254423	chr1	166257568	166260459
			chr1	134006813	134008759	chr5	111712821	111715451	chr1	153756082	153758434	chr2	11910111	11911541
			chr1	137288062	137291360	chr6	5794381	5796375	chr10	8758615	8762498	chr4	15374818	15375541
			chr1	215235843	215236868	chr6	19292253	19294332	chr2	138782903	138786878	chr4	37235614	37237231
			chr1	216493984	216495564	chr7	23919704	23921369	chr2	149911462	149913492	chr4	100869524	100875846
			chr10	51547755	51548666	chr8	3210807	3213843	chr2	159186559	159187872	chr4	115156993	115158916
			chr2	278372	278850	chr8	52782551	52787529	chr3	5182894	5184785	chr4	115940069	115942611
			chr2	145616059	145620615	chr8	55348840	55350891	chr3	138758746	138760025	chr5	112895524	112896952
			chr2	178834014	178838077	chr8	133268397	133269639	chr4	78765451	78768659	chr9	16315799	16316972
			chr2	179114985	179117377	chr9	2387953	2388972	chr4	126364905	126366216	chr1	120799726	120802225
			chr3	140457830	140458583	chr9	4775809	4777111	chr4	135657544	135659647	chr2	179114989	179117307
			chr3	144965051	144967109	Sca85	1849	3082	chr5	87279193	87282979	chr7	84190587	84193412
			chr3	145682342	145683347	chr1	102932811	102934392	chr5	128862425	128864033	chr3	76747512	76749768
			chr4	151394486	151396280	chr1	140174555	140176000	chr5	150587895	150588596	chr10	33069722	33071305
			chr5	2397758	2402069	chr1	186195888	186196797	chr7	19773514	19777555	chr2	1544998	1545899
			chr5	127540581	127543058	chr1	197208953	197210482	chr7	132304777	132305920	chr3	49306496	49307633
			chr6	4474942	4475578	chr1	216275153	216276151	chr8	144084207	144085529	chr3	152393531	152395132
			chr6	5810696	5811575	chr10	1348445	1349195	chr1	207256	208497	chr5	132391034	132391892
			chr6	6388033	6392480	chr10	15296087	15297352	chr1	145773298	145776326	chr5	150559269	150560657
			chr6	12873393	12883992	chr10	44805972	44808082	chr10	7366150	7368272	chr6	14875831	14876689
			chr6	31636757	31639500	chr10	51685648	51686494	chr2	11906407	11909089	chr9	75693995	75696035
			chr6	153954350	153954924	chr2	1074195	1074941	chr1	82155224	82156154	chr2	31208393	31209507
			chr7	105109344	105110309	chr2	32119944	32121511	chr1	169198716	169200988	chr3	26544052	26546293
			chr8	519727	522140	chr2	33930245	33933344	chr2	179086748	179089125	chr4	122265107	122268541
			chr8	2327649	2328755	chr2	104634711	104636881	chr3	134010592	134011838	chr8	144367845	144369623
			chr8	3503187	3505293	chr3	3579548	3580976	chr4	133335463	133337395	chr1	126140786	126142765
			chr8	38152084	38153143	chr3	82443440	82444733	chr5	133417405	133420178	chr1	132586968	132588807
			chr8	143553079	143553705	chr3	126270457	126274321	chr5	163642762	163643542	chr1	135434989	135435991
			chr8	146572382	146573880	chr3	144906067	144906859	chr7	17924165	17929576	chr2	6804613	6805903
			chr9	2841298	2842386	chr3	152915863	152916731	chr7	29708893	29710614	chr2	133971230	133973339
			chr9	5007070	5007533	chr4	61521667	61523188	chr7	38659236	38660640	chr2	153122755	153124336
			chr9	5334247	5335388	chr4	135644277	135645841	chr8	12258190	12259295	chr4	127358557	127359995
			chr9	5342933	5346964	chr4	153480686	153481595	chr8	45746663	45748805	chr7	112365370	112369182
			chr9	5996408	5997312	chr5	2265374	2266886	chr8	79882400	79885623	chr9	2751385	2752201
			chr9	15969806	15970847	chr5	7988557	7989215	chr8	141576856	141578233	chr9	2868988	2870379
			chr9	88210976	88212772	chr5	13501036	13503569	chr8	145795814	145796907	chr2	47703378	47704734
			chr2	434433	435184	chr5	116507434	116509779	chr3	106231509	106232091	chr5	13534221	13535281
			chr2	1539724	1540292	chr5	162081241	162082484	chr4	143629194	143630375	chr5	14258507	14259449
			chr2	2059357	2062997	chr6	1343659	1345567	chr10	1845386	1849166	chr8	109651643	109655161
			chr2	2886810	2891590	chr6	6422826	6424647	chr10	42844814	42848149	chr9	5988518	5990588
			chr3	2171039	2172921	chr6	12273193	12274465	chr2	174094003	174095835	chr1	177197450	177198365
			chr3	4758175	4760405	chr6	39970928	39972420	chr3	63881024	63882281	chr10	50558307	50559582
			chr3	5573645	5574517	chr6	153633214	153634267	chr4	74035724	74037976	chr2	28649606	28650609
			chr3	152165831	152166763	chr7	2826679	2827620	chr4	133054263	133055379	chr2	101904659	101905799
			chr4	202558	206049	chr7	25652600	25654710	chr4	136925362	136930081	chr4	120699844	120701523
			chr4	119400835	119404202	chr7	86741059	86742884	chr5	76881645	76883798	chr6	103976818	103978812
			chr5	162458224	162459932	chr8	539232	540181	chr5	88811041	88812327	chr7	41502013	41502866
			chr6	2964806	2965616	chr8	2588235	2589790	chr5	132671379	132672513	chr1	16235745	16237385
			chr7	946685	948168	chr8	19619736	19621859	chr5	145927832	145928503	chr1	73551972	73555392
			chr7	133446941	133448146	chr8	58153936	58156697	chr8	137170842	137172904	chr10	15296099	15297812
			chr8	522389	522995	chr9	2461585	2465944	chr8	597581	598774	chr3	56473954	56475637
			chr8	540330	541503	chr9	5007089	5007553	chr1	16828995	16829874	chr3	101827500	101829560
			chr8	580132	580856	chr9	55612017	55612328	chr1	165240707	165242293	chr3	129467776	129469544
			chr8	2780509	2781516	chr9	84457784	84459192	chr2	120778299	120781903	chr6	39471194	39473667
			chr8	98282191	98284033	Sca53	2301	2794	chr2	135309722	135311291	chr6	50183949	50185316
			chr8	106044047	106046190	chr1	70801780	70803092	chr3	118560749	118562311	chr6	130789780	130790627
			chr8	143532967	143534151	chr1	84979428	84981005	chr7	2658622	2661264	chr7	29708866	29710622
			chr8	146576372	146579008	chr1	99965441	99965994	chr1	184194976	184195912	chr7	119937963	119939771
			chr9	2662079	2663877	chr10	979806	981653	chr2	178118646	178119667	chr8	78527342	78528944
			chr9	4355883	4357096	chr10	41029241	41030145	chr6	115782883	115785711	chr1	17072532	17073659
			chr9	5306209	5307455	chr10	49815188	49816088	chr9	2995755	2996631	chr3	143864836	143866812
			chr9	5963022	5963760	chr2	13899073	13901601	chr9	12488132	12490503	chr5	32030700	32032828
			chr1	82221021	82222176	chr2	46068146	46070383	chr7	132919052	132920232	chr6	33925106	33927857
			chr10	1172797	1173517	chr2	171760528	171761462	chr9	5223701	5227723	chr9	15969654	15970873
			chr10	21522758	21529578	chr3	130505457	130507716	chr1	725025	727265	chr1	140174593	140176140
			chr3	151089648	151090269	chr3	144979390	144980356	chr1	212850188	212851508	chr1	165494110	165496435
			chr3	153309056	153310488	chr4	173141	174052	chr1	212871275	212871904	chr6	14449525	14451971
			chr3	153760594	153761793	chr4	36991266	36993208	chr2	6851892	6855065	chr6	33271140	33273416
			chr4	173136	174159	chr5	9589665	9590965	chr2	133634629	133637106	chr7	131678588	131680379
			chr4	121862831	121865380	chr6	5247213	5248754	chr3	37970968	37972813	chr3	140855414	140856645
			chr4	147989778	147992495	chr6	6388025	6392458	chr3	71699285	71700920	chr5	129415019	129416088
			chr5	429709	434301	chr6	16635006	16636263	chr3	103671026	103672922	chr5	132671374	132672297
			chr5	2807856	2808861	chr6	101293617	101293912	chr3	146968974	146969831	chr7	73235262	73237745
			chr5	27522192	27526387	chr6	153209739	153211147	chr5	79590294	79592966	chr7	107315045	107316610
			chr5	48396843	48398027	chr6	154252460	154255934	chr5	91808225	91810883	chr8	1706109	1706980
			chr5	55081276	55086998	chr7	31020345	31022154	chr5	124996307	124998628	chr9	13723940	13725200
			chr6	1332366	1335700	chr7	131375817	131377009	chr5	128032305	128033202	chr9	13829820	13830651
			chr6	5211200	5211686	chr8	3281920	3283961	chr6	9326545	9327633	chr1	21653747	21655149
			chr6	39966418	39967501	chr8	6555511	6556915	chr6	39205135	39207274	chr1	131922027	131923094
			chr6	40330432	40332555	chr8	6616993	6619183	chr7	106460917	106462251	chr4	82694760	82696762
			chr6	101312542	101316604	chr9	4575166	4575667	chr8	127041949	127042778	chr4	118612300	118613900
			chr6	152106177	152107369	chr9	5609137	5610407	chr1	25959552	25960979	chr5	13500962	13502632
			chr6	153120369	153123108	chr9	6014795	6016986	chr1	162023644	162026536	chr6	118509616	118511634
			chr7	107458735	107461827	chr1	13948758	13950020	chr6	5831365	5833430	chr8	146793479	146794708
			chr7	133181060	133183511	chr10	71637	73930	chr2	41437705	41439113	chr9	4351178	4352165
			chr8	1768345	1769455	chr10	4396618	4397898	chr2	136119326	136124173	chr1	139071152	139072341
			chr8	2959912	2961138	chr2	11910154	11911478	chr2	174972895	174975379	chr2	8301631	8302737
			chr8	3279794	3281045	chr2	90796311	90797595	chr3	7498278	7499842	chr3	9791417	9793553
			chr8	17644706	17645378	chr2	135188979	135190554	chr3	130941965	130942724	chr4	34537248	34538414
			chr8	140418515	140420306	chr3	135261190	135261700	chr4	1112923	1113802	chr4	51567804	51569320
			chr8	146439884	146440949	chr3	140631137	140633611	chr4	140175495	140178565	chr5	106987603	106991629
			chr8	146809868	146810616	chr4	5260177	5260988	chr4	153750217	153751380	chr8	118599610	118601471
			chr9	1822669	1823927	chr4	6960365	6961767	chr5	161414719	161416319	chr8	141319879	141321372
			chr9	2716607	2717300	chr4	21037284	21038390	chr6	153206682	153212105	chr1	621098	622065
			chr9	4235125	4240930	chr5	2419475	2420272	chr7	29019783	29021898	chr2	2963450	2964883
			chr9	5612211	5612736	chr5	40258976	40261271	chr8	81546283	81548781	chr4	38002099	38003003
			chr1	713402	714450	chr5	141312858	141313879	chr8	142069894	142070901	chr4	99818686	99820390
			chr1	45195659	45200006	chr5	163642854	163643442	chr9	4097286	4097983	chr5	99814607	99815392
			chr1	134014268	134014716	chr6	21482974	21486148	chr1	18308022	18309407	chr5	133418073	133420080
			chr10	28040433	28040767	chr6	25839520	25841632	chr4	21674677	21677177	chr5	137541557	137542772
			chr10	35650315	35653563	chr6	151354600	151356390	chr5	116207809	116209085	chr6	130658931	130662478
			chr2	1538437	1539085	chr6	152324103	152324955	chr4	148084087	148085490	chr2	142276291	142278785
			chr3	2223187	2223690	chr7	35512456	35513167	chr1	30521543	30524549	chr3	5183146	5184785
			chr3	135401803	135405633	chr7	101400228	101401440	chr10	48392748	48396703	chr4	89695266	89697034
			chr3	152333748	152336775	chr7	133045664	133049198	chr10	51302247	51305745	chr4	128041469	128043025
			chr5	2372112	2373393	chr8	1235035	1235844	chr2	18400812	18404718	chr5	88810811	88812311
			chr5	27681939	27684371	chr8	1917810	1919183	chr2	148151128	148153623	chr5	161372609	161373376
			chr6	1393996	1395051	chr8	14089426	14089898	chr3	138670892	138671986	chr6	126760290	126761110
			chr6	3068925	3070658	chr8	101006971	101008083	chr3	153382772	153383843	chr7	25652974	25654692
			chr6	153936074	153937409	chr8	142178316	142179265	chr5	13501029	13502692	chr7	104154364	104156167
			chr6	154252439	154255917	chr8	146570808	146571500	chr5	40258799	40261090	chr9	15364238	15365785
			chr7	6367425	6368588	chr9	216569	217348	chr5	99348979	99351016	chr1	205889003	205889914
			chr8	14922999	14924855	chr1	16976143	16977837	chr5	162319767	162321758	chr2	164547938	164549239
			chr9	4263572	4263982	chr1	191493197	191494371	chr6	12508290	12509164	chr3	153630202	153631322
			Sca75	4	2343	chr10	2444381	2445902	chr6	128979315	128981245	chr4	126023988	126025129
			chr10	4933	6162	chr10	40938666	40939857	chr6	152287030	152288410	chr8	95280237	95282917
			chr10	46976340	46977363	chr10	46984243	46985056	chr7	84190504	84193320	chr8	144160115	144162035
			chr2	380477	382132	chr2	1592223	1593610	chr8	6247887	6249573	chr2	170685500	170687019
			chr2	3423473	3424692	chr2	12637314	12639093	chr8	97279559	97280914	chr3	138758705	138760030
			chr2	46179502	46181148	chr2	80603870	80605730	chr8	101417954	101419024	chr5	14305246	14306346
			chr3	5182882	5184661	chr2	142064466	142065625	chr9	2716508	2717418	chr5	15547387	15548429
			chr3	134023363	134025018	chr3	132655926	132656933	chr9	5177061	5178371	chr5	76881492	76883769
			chr3	135234397	135234860	chr3	151382305	151382999	chr9	16315789	16317575	chr5	82590483	82593241
			chr3	146394362	146395705	chr4	4209681	4210886	chr5	125719619	125721523	chr8	58154074	58156876
			chr3	153303784	153305062	chr6	3134357	3135570	chr9	2664997	2665723	chr8	77118768	77119962
			chr3	153395525	153398954	chr7	9564623	9566028	chr2	135188948	135191137	chr9	76923109	76924422
			chr3	153399483	153402223	chr8	3284455	3285023	chr2	171760468	171761550	chr7	104854277	104855199
			chr4	34764191	34764752	chr8	4191422	4193216	chr2	178833980	178838073	chr1	135375969	135378822
			chr4	147992834	147994764	chr8	14353511	14353864	chr3	101827561	101829452	chr1	173259062	173261091
			chr4	153641917	153642458	chr8	86961567	86963326	chr4	83717203	83718878	chr2	178118707	178119609
			chr4	153747602	153748895	chr8	127711702	127712735	chr5	2409508	2412419	chr3	137647135	137648819
			chr5	15720238	15728994	chr9	4751031	4752736	chr7	49321253	49321969	chr6	368814	369774
			chr5	27693972	27701430	chr9	5359197	5362412	chr7	120077886	120078984	chr6	24831244	24832412
			chr5	89791039	89792429	chr1	40909345	40911048	chr7	131375756	131377035	chr8	113289713	113291133
			chr5	161414737	161416154	chr1	142015754	142016568	chr8	76957796	76959061	chr8	144152375	144153083
			chr5	162081249	162082648	chr1	174674421	174677112	chr8	78236891	78239256	chr9	4599539	4600591
			chr6	1336617	1337304	chr1	194926815	194928364	chr9	1822637	1824202	chr3	147200558	147201586
			chr6	2856416	2857328	chr10	146167	147019	chr9	89649581	89650826	chr4	107291012	107292218
			chr6	5831488	5833428	chr10	6104891	6106244	chr1	186194227	186199706	chr5	14465561	14466681
			chr6	146834785	146837803	chr10	9036839	9039888	chr2	30666335	30668099	chr5	137425761	137433417
			chr6	153206987	153209470	chr10	45751302	45753055	chr1	187724567	187725560	chr7	129972395	129973594
			chr6	153209782	153211098	chr10	51884291	51885723	chr10	25066954	25068042	chr9	67442842	67444124
			chr7	10004973	10008243	chr2	156536521	156540618	chr10	39925356	39926418	chr1	155329422	155331194
			chr7	106540983	106542620	chr2	158638136	158638950	chr2	1589718	1591081	chr1	59240674	59242286
			chr7	132761219	132765254	chr2	177465241	177468004	chr3	151280576	151283308	chr1	153756079	153758568
			chr7	132792045	132793158	chr3	2218918	2220658	chr3	151382196	151383055	chr3	9351710	9352633
			chr8	1839637	1840873	chr3	2236108	2236667	chr4	4209703	4210924	chr3	47506777	47508002
			chr8	143509365	143510720	chr3	134857353	134858470	chr5	14303050	14306269	chr5	95271839	95272733
			chr9	2440959	2442575	chr3	135229992	135232432	chr5	162557924	162558885	chr6	53613611	53615374
			chr9	5293763	5296859	chr3	152355781	152356970	chr8	14089351	14089898	chr9	13706329	13707171
			chr9	5372049	5372663	chr3	152591567	152592744	chr8	16871078	16871340	chr1	30521471	30524472
			chr9	5956884	5959082	chr5	2230332	2238755	chr9	5324363	5326798	chr1	114593174	114595553
			chr9	6014808	6016971	chr5	38292755	38294877	chr1	191401460	191401851	chr1	114649294	114650766
			chr9	35464924	35467390	chr5	125676273	125678238	chr2	364581	365416	chr4	98106897	98108735
			Sca46	1	568	chr6	4353409	4354113	chr3	105051674	105054789	chr4	113956860	113958801
			chr10	1348447	1349178	chr6	5742918	5744421	chr5	121532711	121534300	chr6	152106093	152107292
			chr10	51426622	51429063	chr6	96856865	96858250	chr1	56480660	56481052	chr7	9223339	9225543
			chr10	52424034	52424529	chr6	118605271	118607598	chr10	4396615	4398278	chr7	16857017	16860026
			chr2	104805549	104806582	chr6	146811068	146812168	chr10	15295999	15297861	chr7	19026544	19027644
			chr2	178832004	178832991	chr6	152106169	152107416	chr10	40937307	40939899	chr7	34811187	34812962
			chr2	178841473	178842211	chr7	2616165	2618180	chr10	43920311	43921596	chr8	111150713	111152712
			chr3	7749974	7751279	chr7	81233414	81236486	chr10	52416198	52416977	chr10	243163	243747
			chr3	151080642	151082172	chr7	88666260	88668118	chr3	74487385	74492560	chr4	6943258	6944812
			chr3	152915849	152916730	chr8	16406164	16406496	chr4	151253437	151255073	chr4	31581729	31583196
			chr4	6871645	6872690	chr8	18129989	18132226	chr5	8340516	8342419	chr5	18002780	18004407
			chr4	24533942	24534944	chr8	90614644	90615737	chr5	28496958	28499600	chr5	77151124	77153059
			chr6	4861823	4862769	chr8	93087594	93089096	chr5	121534428	121538167	chr5	129805574	129808218
			chr6	5797307	5798415	chr8	143509400	143510736	chr7	25652621	25654727	chr5	136120825	136122181
			chr6	152281323	152281734	chr8	145298476	145300213	chr7	73235148	73237786	chr6	9600866	9602901
			chr7	110981409	110983422	chr9	12612857	12614420	chr8	145298434	145302202	chr6	120357441	120358752
			chr8	823368	824334	chr9	14410718	14412158	chr9	4775762	4777038	chr6	154309206	154310733
			chr8	51238653	51241126	chr1	47385624	47387229	chr1	173259078	173261056	chr7	2658713	2661190
			chr8	141326759	141327880	chr10	1212374	1215750	chr3	152330163	152332675	chr7	81714575	81716422
			chr8	145964478	145965291	chr3	3113500	3114687	chr6	114989165	114990955	chr8	65521831	65522881
			chr8	146536581	146538599	chr3	103420255	103421769	chr9	2991256	2991780	chr9	22645714	22648288
			chr9	2676189	2677475	chr3	135399359	135402580	chr1	51297983	51298893	chr2	1617182	1617970
			chr9	12393912	12400648	chr3	138691157	138691537	chr1	155028918	155030810	chr6	14503594	14505789
			chr9	88007861	88008935	chr4	101097239	101099240	chr10	70791	74020	chr6	23331905	23333222
			chr1	733501	736213	chr5	27699948	27701455	chr10	243178	243768	chr7	21305535	21307216
			chr1	6720984	6723065	chr6	5112340	5112831	chr10	35650069	35653432	chr1	201984222	201985852
			chr1	215907674	215908954	chr7	41063180	41064566	chr2	2773748	2774713	chr2	154393899	154395278
			chr2	2891706	2892738	chr7	124480998	124483292	chr2	101904865	101905814	chr3	22876193	22877618
			chr2	14115881	14117709	chr8	3307918	3308981	chr3	141926740	141929952	chr3	87140717	87142202
			chr2	180257685	180258483	chr8	100782646	100785725	chr4	126244232	126246449	chr5	1171025	1171923
			chr3	26292943	26293628	chr8	143519057	143521995	chr5	7988526	7989328	chr5	5541438	5543278
			chr3	136038157	136038730	chr9	274454	275066	chr5	162130351	162131140	chr5	32254853	32257345
			chr3	147260138	147260499	chr9	2393031	2394302	chr6	67766253	67767940	chr5	34838398	34839820
			chr3	152586687	152591081	chr9	2751420	2752164	chr6	119359260	119361041	chr6	4211685	4212711
			chr4	16014984	16015485	chr9	2841301	2842395	chr7	2616196	2618230	chr7	33060566	33064141
			chr4	153490742	153491828	chr1	44729179	44730632	chr8	547192	547986	chr8	40689055	40690632
			chr5	484925	486361	chr1	167458546	167459923	chr9	12666240	12667440	chr8	63136561	63137439
			chr5	516440	517301	chr1	211175464	211177190	chr4	105535484	105538050	chr8	81785582	81787473
			chr5	1984436	1988620	chr1	212945737	212946905	chr1	141334354	141335110	chr9	5353347	5354059
			chr5	2230341	2238752	chr10	2751646	2752080	chr1	152829435	152831344	chr1	169744577	169747325
			chr5	141312847	141313876	chr2	3224449	3225228	chr1	161076601	161077931	chr10	42543272	42544292
			chr5	162453313	162456967	chr2	4073518	4074572	chr1	216168441	216168666	chr2	16664603	16666266
			chr6	3949200	3949912	chr2	78345485	78347840	chr2	4073390	4074653	chr3	2598925	2600327
			chr6	123619441	123623679	chr2	136467305	136468348	chr2	170685493	170687029	chr3	103991130	103992318
			chr7	131882701	131884045	chr2	149937477	149940235	chr2	180655860	180657133	chr5	2990321	2991635
			chr8	1235055	1235829	chr3	199591	200484	chr3	55113314	55115641	chr8	2335425	2338355
			chr8	3105091	3108284	chr3	2013378	2014262	chr3	59167396	59168487	chr3	125522772	125524881
			chr8	4209338	4210582	chr3	36606260	36609224	chr3	108677667	108680780	Sca85	1797	3072
			chr8	141322344	141324251	chr3	138899868	138901211	chr3	153365123	153366084	chr1	101961688	101963687
			chr8	142651180	142652777	chr3	152618905	152622860	chr4	153646825	153647984	chr1	153551734	153554674
			chr8	145861653	145863949	chr4	2317868	2319451	chr5	20722043	20724154	chr1	169198876	169200979
			chr9	530048	530543	chr4	21674797	21677021	chr5	125143810	125145603	chr2	149321569	149323304
			chr9	2393053	2394305	chr4	35029722	35030069	chr6	90753453	90754999	chr2	177660819	177661794
			chr9	4724677	4726418	chr4	90562864	90563527	chr6	103793014	103794511	chr3	115329745	115331337
			chr1	142015719	142016505	chr4	112568670	112569107	chr6	146900710	146902189	chr4	40063166	40064322
			chr10	28038067	28038752	chr4	129883436	129884682	chr7	4215487	4219766	chr4	135657556	135659638
			chr2	6851884	6855200	chr5	133904682	133906198	chr7	25307730	25318009	chr5	142199107	142200281
			chr3	1222249	1227242	chr6	5810687	5811604	chr7	129972269	129973601	chr6	39205120	39207353
			chr3	2220755	2221339	chr6	6542972	6543884	chr8	46522032	46522647	chr6	103722896	103724281
			chr3	141231780	141233348	chr6	40199470	40200437	chr8	96545518	96548024	chr6	106894009	106898105
			chr3	144854152	144855254	chr6	96152719	96155151	chr8	146377687	146378374	chr7	6479141	6480173
			chr3	144989258	144989691	chr6	114989361	114990975	chr9	2772926	2774293	chr7	91514134	91515588
			chr3	151953491	151954967	chr6	115424462	115428290	chr3	144210368	144212410	chr8	9890201	9892554
			chr4	2404117	2405439	chr6	152070543	152072040	chr6	50333396	50337364	chr8	80470920	80472404
			chr4	34711375	34711994	chr6	153206733	153209519	chr7	92933166	92934842	chr8	118594159	118595447
			chr4	34918551	34918802	chr6	153945647	153947305	chr9	3831891	3832613	chr9	66419245	66420343
			chr4	148015168	148018737	chr7	10004929	10010505	chr2	150110634	150113713	chr1	153821189	153822503
			chr5	163956989	163957468	chr7	15654916	15656021	chr2	178841411	178842317	chr10	33153732	33156204
			chr8	11033708	11034462	chr7	62952049	62953031	chr3	39865143	39866311	chr2	8232308	8233841
			chr8	22255098	22257323	chr8	645892	648459	chr4	202552	206125	chr2	21824694	21826191
			chr9	2438344	2438849	chr8	3503194	3505316	chr4	4258568	4259642	chr2	159186432	159187910
			chr9	5205661	5208089	chr8	81786019	81787562	chr4	99678795	99680670	chr4	120124886	120126317
			chr9	7131007	7134398	chr8	88703178	88705334	chr4	101097270	101099235	chr5	21223484	21226014
			chr9	25051288	25074130	chr8	107708843	107710844	chr5	1394992	1396099	chr8	145128602	145129353
			chr9	25311963	25313964	chr8	118593959	118595357	chr6	13330797	13335626	chr9	384911	386550
			chr1	143419520	143420134	chr8	143551891	143552263	chr7	88684365	88685475	chr9	84457906	84459187
			chr1	212871292	212871862	chr9	2439476	2440261	chr8	539094	542014	chr1	139504948	139507026
			chr10	2154889	2156384	chr9	6018192	6019428	chr9	2576996	2578644	chr2	137663579	137665740
			chr10	46140467	46141443	chr9	88033559	88034253	chr9	6008791	6010895	chr6	89069284	89071107
			chr10	51557021	51557768	chr1	99947682	99951447	chr10	45248793	45252685	chr6	126272784	126274592
			chr2	1797300	1798049	chr1	152858314	152859455	chr2	30672487	30673473	chr9	5177084	5178353
			chr2	180044186	180045305	chr10	2742609	2743513	chr8	1595920	1597141	chr1	31746370	31747929
			chr3	36704165	36704576	chr10	51712022	51712551	chr8	129187483	129190315	chr1	154392520	154394323
			chr3	135717542	135718041	chr10	51940201	51941449	chr8	139580608	139580983	chr2	4073353	4074665
			chr3	141215953	141219795	chr2	1589777	1590985	chr9	2688990	2689637	chr2	82775079	82776494
			chr3	141233619	141235046	chr2	11819597	11820875	chr1	18065667	18068060	chr5	96570425	96572092
			chr3	153503546	153505249	chr2	86520640	86523906	chr1	22053833	22055867	chr6	93113278	93115360
			chr4	34765778	34766203	chr2	135122062	135123614	chr1	44844564	44845494	chr1	19641857	19643117
			chr4	117386187	117386497	chr3	96796332	96799012	chr1	106489178	106491079	chr1	136219511	136220862
			chr5	2224715	2226786	chr3	126319661	126322796	chr10	52068737	52069661	chr2	150110619	150112613
			chr5	70363698	70364034	chr5	24253176	24255822	chr4	121857339	121859233	chr4	101097140	101099190
			chr5	153935695	153936255	chr5	88811154	88812203	chr4	153477153	153479217	chr6	26720841	26723826
			chr6	897326	899037	chr6	4048388	4048756	chr5	1984399	1988661	chr8	117863753	117864549
			chr6	4970874	4972010	chr6	130658810	130662720	chr5	41659251	41664050	chr9	83828006	83829705
			chr6	4987019	4989866	chr6	154309233	154312529	chr5	106987659	106991574	chr1	126863834	126864916
			chr7	124394970	124397533	chr7	2822986	2823993	chr6	13883095	13885538	chr1	217238409	217239394
			chr8	517315	518487	chr7	40996126	40997428	chr6	33920394	33921528	chr4	35682911	35683988
			chr8	539175	540210	chr8	480492	481665	chr6	103977021	103978968	chr6	12273164	12274470
			chr8	2381451	2383773	chr8	1329317	1331339	chr8	68010073	68011777	chr2	164384946	164386281
			chr8	2844423	2845231	chr8	1674424	1674966	chr1	139714228	139715760	chr4	105535758	105537920
			chr8	3136578	3138639	chr8	83282039	83284633	chr4	140170403	140172273	chr4	148721616	148722500
			chr8	3284471	3285017	chr8	103850691	103853056	chr7	33060538	33064236	chr6	26363998	26365757
			chr8	142639306	142640381	chr8	113847954	113849702	chr7	123026848	123027827	chr7	3546600	3547359
			chr8	144121758	144122593	chr8	141576961	141578156	chr1	36220906	36222549	chr7	41406630	41408013
			chr9	1830740	1832925	chr8	141779824	141784712	chr1	134247801	134251656	chr7	115787948	115789314
			chr9	2988945	2989259	chr8	144785291	144786605	chr1	205053486	205054470	chr7	117491135	117492594
			chr9	5609198	5610445	chr9	4655245	4655766	chr10	2656093	2656892	chr7	124822901	124823817
			chr9	7977515	7977955	chr9	4732155	4732631	chr10	17295900	17301834	chr1	109094221	109096361
			chr9	90280547	90281460	chr9	5293713	5296859	chr10	45542816	45544097	chr1	131669269	131671315
			chr9	90282526	90283801	chr9	5716552	5718172	chr10	48385705	48387237	chr1	155028880	155030797
			chr9	90831634	90833043	chr9	25141470	25142280	chr10	51685582	51686508	chr1	191446314	191448635
			chr1	36566806	36569921	chr1	94941125	94941740	chr3	134749380	134750851	chr3	62655685	62657169
			chr10	50558218	50559479	chr1	109326846	109327955	chr4	1098136	1099334	chr4	61476607	61477347
			chr10	51553932	51554470	chr1	173259092	173260848	chr4	82694777	82696774	chr4	100273526	100275522
			chr2	1829354	1831839	chr1	189327467	189328425	chr5	30489544	30491924	chr4	112212029	112213533
			chr3	94978726	94981831	chr10	3999023	4000052	chr5	161372589	161373389	chr5	117180610	117183615
			chr3	109252019	109254410	chr10	39925324	39926375	chr6	147736105	147737269	chr7	81233381	81236506
			chr3	134209628	134211039	chr10	51967600	51968411	chr7	9564537	9566061	chr7	117986452	117988011
			chr3	135221533	135226940	chr2	121555231	121557083	chr7	9826943	9828205	chr8	45746558	45748879
			chr3	138691183	138691502	chr2	133971421	133973299	chr7	106460195	106460670	chr2	12637246	12638770
			chr3	152358169	152360415	chr2	148530150	148532155	chr7	131721798	131722393	chr2	89590603	89592150
			chr4	39464831	39465142	chr2	179114988	179117374	chr7	133045515	133049193	chr2	127160151	127162273
			chr4	151693273	151695020	chr3	47203025	47203311	chr8	92549185	92549946	chr4	4258585	4259619
			chr5	16788320	16789581	chr3	59032441	59033694	chr8	147057985	147058344	chr4	6797290	6797992
			chr5	138797871	138799238	chr3	108677572	108680698	chr9	59381670	59385023	chr4	89655742	89657848
			chr5	162130386	162131108	chr3	119257003	119260145	chr1	79453708	79456079	chr7	35264755	35266185
			chr6	1182213	1182951	chr3	125125287	125130771	chr1	130446041	130447550	chr7	35414506	35415612
			chr6	2701743	2702967	chr3	144853917	144855289	chr1	180069326	180070113	chr1	20375296	20376642
			chr6	5195500	5198274	chr3	144989267	144989715	chr10	2403666	2405495	chr6	24948862	24950371
			chr7	132641690	132642491	chr3	152511355	152512235	chr2	1544938	1545806	chr7	43330419	43331834
			chr8	588555	589242	chr3	153291375	153292227	chr2	140585373	140587624	chr8	86330417	86334633
			chr8	681903	682659	chr4	1112993	1113757	chr3	119354914	119357075	chr9	72698564	72702788
			chr8	1706132	1706920	chr4	2497550	2498953	chr3	126872383	126873154	chr1	161076421	161077953
			chr8	20763573	20763961	chr4	98107171	98108645	chr3	130949511	130953421	chr1	18570314	18571548
			chr9	5265413	5276921	chr4	153431298	153432302	chr4	147989729	147995134	chr2	18586524	18587628
			chr9	5324670	5326741	chr5	1984436	1988653	chr5	3187622	3188846	chr5	8477158	8479688
			chr9	5353341	5358111	chr5	13219156	13222210	chr6	54508679	54510266	chr5	114987066	114988651
			chr9	89511988	89512909	chr5	75839410	75841372	chr7	41063144	41064566	chr7	88684338	88685577
			chr1	16934387	16939607	chr6	662224	663133	chr7	120840511	120841861	chr8	141326630	141327939
			chr1	206620195	206623039	chr6	5209899	5211714	chr8	2052857	2054571	chr9	67261367	67263765
			chr1	213208688	213209048	chr6	97000992	97002002	chr9	2466941	2470177	chr1	16902708	16904939
			chr10	22459	22685	chr7	6357544	6358559	chr9	2549570	2551265	chr1	114298810	114300250
			chr10	10637970	10639654	chr7	46909693	46911649	chr9	90258663	90260400	chr1	150461255	150462326
			chr2	141039325	141042429	chr7	92585288	92586103	chr1	35410753	35411471	chr1	212850207	212851532
			chr2	174961911	174962677	chr7	131880437	131881250	chr10	10836342	10838577	chr10	33028876	33030817
			chr2	179394286	179394665	chr7	132742302	132743983	chr3	102342951	102344468	chr4	122050690	122052495
			chr3	1361923	1363883	chr8	468090	469075	chr8	106339642	106343685	chr4	123575890	123576820
			chr3	2311030	2311947	chr8	3497503	3498569	chr9	6038914	6039913	chr5	26909124	26910589
			chr3	134709640	134710748	chr8	68010082	68011707	chr1	40884707	40886942	chr5	119961994	119964299
			chr3	135261207	135261646	chr8	108603781	108605399	chr1	67670910	67672388	chr6	23552856	23553731
			chr3	146962208	146963411	chr8	119935851	119937715	chr10	50883146	50884032	chr6	43662293	43663383
			chr3	147003886	147006561	chr8	144735700	144736312	chr2	135616712	135618891	chr6	97289689	97291369
			chr3	151618829	151621943	chr9	2892280	2894342	chr2	179973130	179974457	chr8	12258170	12259199
			chr3	152157391	152158148	chr9	4256842	4257202	chr4	151725795	151729183	chr2	51991251	51993463
			chr3	152550022	152550846	chr9	4746872	4747450	chr5	17291003	17292726	chr4	10157538	10160097
			chr3	152572491	152575138	chr9	13723996	13725288	chr5	36773393	36782004	chr5	68401296	68403784
			chr3	152594962	152596149	chr9	15293557	15295550	chr5	130467679	130472883	chr5	116095950	116097757
			chr4	35018768	35019080	chr1	215235869	215236863	chr5	161420723	161421823	chr7	37391321	37393187
			chr5	652379	653696	chr2	146685946	146688509	chr6	5247286	5248735	chr1	24535037	24537319
			chr5	1151759	1152494	chr3	9389390	9390218	chr7	6479167	6480178	chr1	205509478	205510535
			chr5	2228448	2229403	chr3	151080666	151082184	chr7	35264846	35265902	chr10	13954156	13955176
			chr5	27874091	27875817	chr4	21521131	21524752	chr7	90518611	90519536	chr2	111918863	111920912
			chr5	44505178	44509104	chr5	39027548	39028938	chr7	95725705	95729335	chr5	143224580	143230257
			chr6	1395604	1396311	chr6	140575151	140576547	chr7	105061940	105064957	chr6	140411985	140413376
			chr6	3874673	3875142	chr6	154306169	154307566	chr8	1148624	1149735	chr7	95020931	95022524
			chr6	6728945	6730235	chr8	3304521	3305018	chr8	128524985	128526740	chr8	96310185	96311662
			chr6	12273187	12274435	chr9	5963017	5963760	chr9	216526	217417	chr9	7235805	7237069
			chr6	151283707	151284757	chr9	49785392	49787102	chr9	2704794	2705820	chr9	20300013	20300773
			chr6	153950532	153951212	Sca20	24222	25087	chr9	22527969	22530813	chr1	76937022	76937702
			chr7	2826698	2827631	chr1	6720970	6723099	chr2	125264273	125266180	chr1	164820368	164822199
			chr7	17835452	17835774	chr1	18293170	18293899	chr2	159745834	159747916	chr2	40957777	40959619
			chr8	1778947	1780545	chr1	21026084	21031362	chr2	179778451	179779261	chr4	21674689	21677172
			chr8	4232208	4233269	chr1	22053868	22055733	chr3	2203435	2203810	chr6	119910872	119912369
			chr8	128524966	128526723	chr1	56257345	56257997	chr6	146811072	146812173	chr9	20419593	20421681
			chr8	145403809	145404713	chr1	165351400	165354558	chr9	78684923	78686029	chr9	4775899	4776732
			chr9	227223	227750	chr1	165494108	165496445	chr1	21469059	21470709	chr1	24430408	24431984
			chr9	2437366	2438197	chr1	178971861	178972620	chr1	140174538	140176054	chr10	41029165	41030264
			chr9	4245995	4250089	chr1	200706090	200708227	chr1	157776529	157778949	chr4	127900732	127902219
			chr9	4740557	4745310	chr1	205889016	205889861	chr1	205057535	205059160	chr5	33762852	33764512
			chr1	6704098	6704991	chr10	7501554	7502942	chr1	205888965	205889950	chr5	87074817	87076942
			chr1	215700648	215702112	chr2	1499240	1501636	chr2	717714	724050	chr5	161007405	161008671
			chr10	11701721	11702857	chr2	2773778	2774641	chr2	31208504	31209370	chr7	123026793	123027904
			chr2	175148576	175151289	chr2	86660898	86662684	chr3	5186012	5187688	chr9	74423089	74424433
			chr2	180996056	180996779	chr2	114925690	114927368	chr3	58775510	58778204	chr2	55246975	55249037
			chr2	181028509	181028889	chr2	180655885	180657036	chr3	61571830	61573326	chr2	121613811	121615534
			chr3	139283298	139284850	chr3	3808629	3810295	chr3	125521260	125526128	chr2	125066954	125069448
			chr3	144785584	144786473	chr3	4736107	4736713	chr3	152333622	152336831	chr3	123006582	123008127
			chr3	152352942	152355282	chr3	56474053	56475665	chr4	115219937	115220949	chr4	86827234	86828867
			chr3	152514838	152516107	chr3	63881064	63881971	chr4	148975806	148977903	chr4	143298058	143299341
			chr4	135646874	135649071	chr3	126383669	126386046	chr5	138937518	138938594	chr6	4202407	4203495
			chr4	153107997	153109141	chr3	138290767	138291786	chr5	150559319	150560590	chr6	40199341	40200420
			chr4	153466517	153468228	chr3	141927035	141929880	chr5	152936367	152937477	chr6	100232386	100234112
			chr6	1349201	1350156	chr3	152157363	152158160	chr5	161292857	161293768	chr7	40997667	40999287
			chr6	1399685	1400762	chr4	97365781	97366750	chr6	108764506	108767982	chr7	94734802	94737576
			chr6	110905350	110905707	chr4	151708654	151709572	chr6	153633185	153634353	chr8	127679641	127680829
			chr6	151353494	151356395	chr4	153490734	153491834	chr8	7024666	7027337	chr1	120803653	120804980
			chr6	152305157	152307489	chr5	26523	27841	chr8	97522312	97524227	chr1	156672666	156673489
			chr7	2820092	2820812	chr5	2397673	2402073	chr8	114788644	114790700	chr2	41637333	41638995
			chr7	15655039	15656089	chr5	92725723	92726215	chr9	2389307	2394340	chr2	76069471	76070535
			chr7	93720055	93720804	chr5	146516215	146517572	chr9	3151040	3153688	chr2	150982686	150985517
			chr7	132749539	132751459	chr5	163872440	163872765	chr1	45426844	45429846	chr3	134158127	134159096
			chr7	133045604	133049140	chr6	1170979	1173091	chr1	148761910	148764261	chr3	147621414	147623572
			chr8	832729	833797	chr6	1349195	1350091	chr2	28649647	28650521	chr4	99678793	99681151
			chr8	15261603	15261936	chr6	7453725	7455851	chr2	137663545	137665712	chr7	6357512	6358598
			chr8	16845057	16846050	chr6	67766348	67767812	chr3	78241743	78242782	chr7	31958785	31960084
			chr8	19331746	19332329	chr6	146900708	146902157	chr3	138194026	138195184	chr8	2910135	2912414
			chr8	96545702	96548116	chr6	153330941	153333130	chr3	150945526	150946405	chr8	106339587	106343207
			chr8	145093448	145096287	chr7	41502108	41502834	chr4	97550654	97551407	chr9	90247927	90249459
			chr9	2408853	2409609	chr7	111846436	111849560	chr4	115433260	115435378	chr1	180069372	180070212
			chr9	2455256	2457659	chr7	132747656	132748662	chr5	14800095	14801863	chr10	46139602	46141429
			chr9	4226197	4228516	chr7	132751708	132754878	chr5	14918079	14919496	chr10	52269005	52269689
			chr9	5347619	5348831	chr8	519703	522205	chr5	95271873	95272809	chr2	120736398	120737889
			chr9	35470729	35471295	chr8	570789	571678	chr5	161698314	161700470	chr3	77131883	77132861
			chr9	89443745	89444380	chr8	1595989	1597111	chr6	4970830	4972081	chr3	144372605	144373549
			chr9	90258835	90260319	chr8	59947238	59948073	chr6	90544127	90545288	chr6	133698850	133700027
			chr1	81837451	81838909	chr8	82573438	82576858	chr6	128128785	128129694	chr8	144121714	144122530
			chr1	104897417	104898282	chr8	94979113	94982995	chr7	7976153	7977329	chr9	216522	217419
			chr1	108015042	108016916	chr8	95435503	95437331	chr7	16856856	16860040	chr9	54482877	54483987
			chr1	191642300	191646629	chr8	127174320	127176290	chr7	19726324	19727797	chr3	142456143	142457538
			chr1	216153887	216154452	chr8	145964467	145965284	chr7	127498153	127500414	chr2	1633328	1634390
			chr10	49780444	49783242	chr9	4237652	4240926	chr8	12235922	12236884	chr2	34224521	34228252
			chr10	51551259	51552270	chr9	6038943	6039962	chr8	21768862	21770468	chr3	98166261	98168282
			chr2	1799219	1800601	chr9	14994695	14997788	chr8	137291810	137293463	chr4	121857356	121859229
			chr2	123388653	123391912	chr9	55533617	55533945	chr8	141319919	141321429	chr4	153646934	153647979
			chr2	138753495	138755243	chr9	89649771	89650757	chr9	2299874	2304502	chr5	32716010	32718008
			chr3	135227248	135228253	chr1	130446048	130447634	chr3	135230067	135232472	chr5	146516142	146517553
			chr3	138900099	138901359	chr1	134248048	134251589	chr7	32250983	32253924	chr6	153330822	153333201
			chr3	139288131	139289737	chr10	41109248	41111472	chr9	5711899	5713207	chr7	9553412	9554313
			chr3	141226812	141229910	chr10	50642590	50643279	chr1	16902686	16906107	chr7	29851559	29853201
			chr3	144328974	144329966	chr10	51913611	51914118	chr1	114649313	114650674	chr8	28183255	28184303
			chr3	144638492	144639861	chr2	137817891	137822153	chr10	6103543	6106204	chr8	141576947	141578170
			chr3	152548321	152548835	chr3	19768723	19772746	chr10	42543360	42544295	chr8	144424190	144425474
			chr4	191695	192347	chr3	109252241	109254446	chr2	418651	419664	chr9	4526570	4527389
			chr4	518699	519205	chr3	134726698	134727500	chr2	90314147	90316070	chr1	167992829	167994355
			chr4	6960438	6961757	chr3	144581371	144582335	chr2	114925647	114927374	chr2	82063323	82064563
			chr4	7012368	7014464	chr3	153353831	153354427	chr2	148817999	148819479	chr2	136035188	136038945
			chr4	144904425	144906258	chr4	6797408	6797966	chr2	149392230	149394813	chr3	125260327	125263280
			chr5	1378458	1381038	chr4	144908843	144909963	chr2	160649017	160651920	chr3	139294871	139296327
			chr5	2409777	2412324	chr4	153744467	153745941	chr3	1207333	1208164	chr6	41566430	41569098
			chr5	2795972	2798381	chr5	22893	23561	chr3	57146129	57147820	chr6	54508415	54510189
			chr5	6110613	6111503	chr5	129009220	129010155	chr3	152591503	152592935	chr1	31434997	31437091
			chr5	41668872	41671491	chr5	152936402	152937332	chr4	39435801	39437002	chr10	28224046	28225165
			chr5	65885907	65886309	chr6	368800	369742	chr5	6577158	6578411	chr2	364543	365487
			chr5	153117184	153118738	chr6	5107578	5110017	chr5	14465609	14466857	chr2	77849919	77852200
			chr5	161943441	161944024	chr6	12765749	12767820	chr5	146516126	146517637	chr2	159746158	159747899
			chr5	162504850	162506109	chr6	14449499	14451941	chr6	12340047	12341746	chr3	110023863	110024870
			chr6	4226376	4228016	chr6	149946979	149947877	chr6	153130824	153131508	chr5	138457093	138459727
			chr6	4782409	4782967	chr6	153211325	153212023	chr7	2963721	2965029	chr5	138796824	138799270
			chr6	5258031	5259875	chr6	153938839	153940020	chr7	26918864	26923109	chr5	150417007	150418703
			chr6	42736502	42738695	chr7	9060070	9061137	chr7	28139489	28141151	chr7	25601925	25603316
			chr6	131395986	131397044	chr7	19259107	19260400	chr7	31020775	31022229	chr8	71278708	71280189
			chr6	153955630	153956119	chr8	823381	824359	chr7	103644153	103645098	chr9	15972345	15973293
			chr7	2823010	2823970	chr8	1219277	1220803	chr7	103961746	103963037	chr9	28142870	28143968
			chr7	9602769	9603870	chr8	13525099	13525460	chr8	104404	105565	chr1	102572304	102574961
			chr7	124522210	124523620	chr8	143532873	143534119	chr8	823309	824413	chr1	202597091	202598423
			chr7	132768575	132769248	chr8	146437050	146438620	chr8	145128581	145129336	chr10	11621342	11622773
			chr8	536432	538600	chr8	146541634	146542479	chr2	1797301	1798103	chr2	30666756	30668103
			chr8	932053	933799	chr9	2440949	2442581	chr2	158638121	158639028	chr2	57108966	57111109
			chr8	1805643	1806389	chr9	12700901	12702427	chr3	134726705	134727527	chr2	174094102	174095882
			chr8	2375743	2379333	chr9	86348908	86349822	chr5	32716244	32717985	chr3	19590548	19591944
			chr8	3506715	3508794	Sca36	3268	4035	chr5	116095599	116097816	chr3	147033386	147034909
			chr8	7024646	7027367	Sca4	31735	34054	chr7	21305535	21307176	chr3	151382251	151383048
			chr8	144981943	144983124	chr1	36058379	36060862	chr7	113252113	113254965	chr5	101065115	101071285
			chr9	471540	472321	chr1	160154933	160156840	chr7	116718320	116719508	chr5	162433020	162434761
			chr9	2546591	2548309	chr1	170622753	170624562	Sca20	24166	25187	chr6	12508359	12509155
			chr9	15972364	15973305	chr10	2656188	2656832	chr1	138975688	138980855	chr6	153185012	153186097
			chr9	83177638	83179531	chr2	278371	278852	chr2	22526689	22527998	chr7	9184419	9185515
			chr1	621221	622040	chr2	102672046	102673143	chr2	34224463	34226850	chr7	106754491	106755992
			chr10	45143428	45144369	chr2	175580776	175581498	chr2	152382175	152386082	chr8	68481154	68483179
			chr10	52417729	52418198	chr3	4374011	4375380	chr3	104908438	104909622	chr8	141861740	141863491
			chr2	1570291	1572141	chr3	5565814	5567042	chr3	123007098	123008129	chr9	15909895	15911021
			chr2	2900734	2903728	chr3	7498313	7499718	chr3	138290727	138291822	chr9	49275556	49276356
			chr2	3417993	3419857	chr3	37971104	37973188	chr4	34408273	34408933	chr9	83969993	83970969
			chr2	15535534	15543127	chr3	93934213	93936011	chr4	39437683	39438328	chr1	12281509	12282679
			chr2	18401231	18402559	chr3	135060474	135066163	chr4	127358613	127360014	chr1	130445872	130447483
			chr2	177472889	177473782	chr3	141233618	141235056	chr6	96992442	96992982	chr1	216510698	216511565
			chr3	727054	728444	chr3	144644834	144650433	chr6	126272844	126274627	chr3	121146620	121147704
			chr3	36618310	36618943	chr3	146259490	146260004	chr6	154330313	154332922	chr3	138212087	138213063
			chr3	141926924	141929942	chr3	146968677	146969817	chr7	2947643	2950888	chr5	78347738	78349478
			chr3	152169974	152170863	chr3	152330383	152332646	chr7	81714589	81716560	chr6	21634564	21636288
			chr4	5246867	5247474	chr4	6991615	6993667	chr7	117609454	117610183	chr7	9924282	9924971
			chr4	9809218	9810784	chr4	115940036	115943360	chr8	9197617	9199962	chr9	66262531	66263855
			chr4	13689758	13690855	chr4	147989785	147992507	chr8	32311646	32313290	Sca20	24166	25182
			chr4	91921387	91923410	chr5	14671805	14673545	chr8	98657953	98659559	chr1	63097761	63103023
			chr5	13219165	13222282	chr5	82590537	82593222	chr8	145167983	145168752	chr2	148817987	148819477
			chr5	70384390	70385139	chr5	93094935	93096139	chr9	12607790	12609528	chr3	63195921	63196701
			chr5	143341669	143344724	chr5	116095556	116097839	chr9	88096474	88098165	chr3	104947552	104949495
			chr5	163045697	163049247	chr5	154207825	154208715	chr2	147753303	147754223	chr3	125604605	125606149
			chr6	2533495	2535714	chr6	3473580	3474706	chr3	143417974	143419706	chr3	144344136	144346109
			chr6	2716623	2717455	chr6	4397127	4397858	chr5	57972664	57973295	chr4	138609879	138610928
			chr6	4436896	4437724	chr6	5202052	5203215	chr8	146301146	146304654	chr5	90643913	90645293
			chr6	5318494	5319763	chr6	13325988	13327842	chr9	4746743	4747491	chr5	128032152	128033284
			chr6	16635004	16636203	chr6	21644397	21646313	chr1	31694151	31695396	chr5	143293110	143294743
			chr6	153832282	153833806	chr6	33587705	33589014	chr1	56257340	56258007	chr1	139743170	139745697
			chr7	4215601	4218178	chr6	50334048	50336354	chr1	201925074	201927094	chr1	141993181	141994149
			chr8	693254	694229	chr6	152148924	152149899	chr10	10890379	10892527	chr1	151612721	151614341
			chr8	706522	707431	chr6	153130927	153131443	chr10	11701640	11703045	chr2	84226490	84227540
			chr8	1057973	1058669	chr7	34811200	34812835	chr10	36493679	36495196	chr2	101264652	101265594
			chr8	1553033	1554167	chr7	35264906	35265971	chr10	51940081	51941502	chr2	122101278	122103891
			chr8	2808154	2810247	chr7	76253395	76254671	chr2	172679950	172680880	chr2	133634614	133636999
			chr8	111147484	111150457	chr7	105136962	105137551	chr3	5558209	5559026	chr3	55671993	55675130
			chr8	119935982	119937660	chr7	128883891	128885053	chr3	152466901	152467823	chr3	104638565	104640518
			chr8	141576922	141578156	chr7	132947707	132950122	chr4	84716275	84718705	chr3	126673455	126674835
			chr8	144864340	144868022	chr8	3506709	3508804	chr4	97710189	97711382	chr8	133268339	133269647
			chr8	145065483	145066102	chr8	88619527	88621348	chr5	162458234	162459976	chr8	145072147	145073185
			chr9	1853608	1854268	chr8	139770365	139771026	chr6	4353317	4354108	chr9	90259052	90260402
			chr9	4988988	4989789	chr8	144160124	144162045	chr6	27176360	27178148	chr1	100030853	100032461
			chr9	6005582	6006881	chr8	145407023	145407886	chr6	40326308	40329573	chr5	139571439	139574906
			chr1	715285	717285	chr9	1814166	1816179	chr6	117517572	117519073	chr8	3144148	3145451
			chr1	6694277	6695797	chr9	2559967	2562921	chr7	26892829	26896768	chr8	28703168	28705844
			chr1	60057959	60061179	chr9	7130993	7134393	chr8	3210758	3213919	chr8	80642388	80643721
			chr1	104911760	104912166	chr9	64903045	64903944	chr9	2461534	2466013	chr8	103321455	103324892
			chr1	153552361	153555231	chr9	66853141	66854789	chr9	4985246	4985711	chr10	36197947	36199755
			chr1	215241602	215243078	chr1	211306665	211307439	chr3	3023067	3024221	chr10	47343701	47344961
			chr1	216275068	216275716	chr10	49694011	49695396	chr4	71004225	71007232	chr10	50883144	50883983
			chr10	17295966	17301762	chr2	47697238	47700664	chr9	32586790	32587951	chr2	14656076	14657137
			chr10	50642586	50643271	chr3	36593280	36594730	chr1	21026159	21031584	chr2	123388813	123391915
			chr10	51581767	51582781	chr3	72506990	72508607	chr1	36307693	36310352	chr4	71004320	71008619
			chr10	51685664	51686442	chr3	144564274	144565176	chr1	138045720	138051006	chr4	145846330	145847254
			chr10	51907395	51907943	chr5	145724388	145725899	chr1	191669157	191671564	chr5	129854113	129855433
			chr2	923302	923857	chr6	1399676	1400770	chr2	587061	588303	chr6	61899072	61900424
			chr2	1483946	1485180	chr6	5267643	5268038	chr2	1861114	1863654	chr8	21768838	21770521
			chr2	1494691	1495788	chr6	6439048	6442145	chr2	83286101	83287519	chr6	42137291	42138545
			chr2	9697785	9699927	chr6	141199549	141202179	chr2	90789645	90790190	chr1	197930149	197931884
			chr2	14228916	14231278	chr7	6241263	6242057	chr2	136469536	136470134	chr10	18506181	18507618
			chr2	23131558	23132830	chr8	577578	578874	chr3	93606306	93607544	chr6	27176339	27178138
			chr2	97818086	97820580	chr8	16221319	16221671	chr3	119335106	119336077	chr7	18232262	18235631
			chr2	135616817	135618849	chr8	46093447	46095525	chr3	129778507	129779174	chr7	29308606	29309924
			chr2	168892161	168893499	chr8	144098384	144099315	chr3	130614807	130616719	chr7	112134222	112138562
			chr2	178986935	178989033	chr8	145952242	145953683	chr3	132789485	132791326	chr8	22255131	22257307
			chr2	180995389	180995720	chr9	75694265	75695959	chr3	135398074	135398686	chr9	52208902	52213484
			chr3	5101818	5102334	chr1	731189	733166	chr3	140631102	140633640	chr1	160054788	160055779
			chr3	139703753	139705355	chr1	16945991	16947247	chr4	153695618	153696729	chr2	55839492	55842734
			chr3	144564187	144565176	chr1	40884860	40886798	chr5	153776597	153778395	chr2	151974889	151976024
			chr3	147046233	147046743	chr1	68328791	68330139	chr6	23552871	23553889	chr2	174482698	174483477
			chr3	150978679	150979806	chr1	82328571	82330623	chr6	89069228	89071071	chr3	3579580	3580960
			chr3	150980563	150981075	chr1	112431912	112433103	chr7	99541846	99543233	chr3	126306591	126311545
			chr3	152597597	152598064	chr1	157776646	157778866	chr8	132466893	132468124	chr4	24933226	24934959
			chr4	518103	518526	chr1	212281849	212282901	chr2	127306195	127307267	chr4	60197679	60199461
			chr4	70673666	70679103	chr1	212871276	212871882	chr3	141233578	141235114	chr4	82725321	82727425
			chr4	100835476	100839173	chr10	33069707	33071220	chr4	112568587	112569156	chr5	33542913	33545667
			chr4	121981330	121982529	chr10	49809462	49810555	chr5	45220766	45222169	chr7	129501485	129502699
			chr4	135634790	135643689	chr10	50883176	50883958	chr7	12790006	12791161	chr8	99643845	99645052
			chr4	153695703	153696581	chr2	1135305	1136703	chr8	51145800	51146845	chr8	105911651	105912763
			chr5	335530	337423	chr2	1494626	1495777	chr8	107708806	107710880	chr1	25507987	25508957
			chr5	6124595	6129043	chr2	1502071	1502797	chr1	102572328	102574949	chr1	65664541	65669956
			chr5	8136098	8136961	chr2	1545080	1545801	chr1	127726871	127729708	chr1	166464458	166465942
			chr5	137442316	137446283	chr2	1662131	1664146	chr1	205509507	205510473	chr1	191669245	191670542
			chr5	154268121	154269800	chr2	32503965	32505109	chr10	145948	147174	chr2	53729378	53731159
			chr6	1103453	1104131	chr2	47414625	47416405	chr10	1348430	1349252	chr3	107438383	107440446
			chr6	3169595	3171693	chr2	102968136	102971245	chr10	51884201	51885737	chr5	118283741	118286363
			chr6	3185586	3188517	chr2	168892155	168893530	chr3	4730263	4730924	chr6	112852784	112854987
			chr6	5077218	5078047	chr2	172012367	172013796	chr3	55672056	55675041	chr7	49321211	49321967
			chr6	110850474	110850757	chr3	2031974	2032756	chr3	118294851	118296571	chr7	117346431	117347677
			chr6	153144824	153145702	chr3	4734721	4735964	chr3	132655877	132657033	chr7	117570292	117571079
			chr7	6247495	6250184	chr3	8394495	8396118	chr3	153503470	153505416	chr9	15585491	15586334
			chr7	88666268	88667924	chr3	9402717	9405102	chr4	64904589	64908164	chr9	56662507	56664770
			chr7	105140341	105141256	chr3	9791265	9793678	chr4	83567842	83569957	chr2	53490186	53491004
			chr7	131916000	131917728	chr3	36677179	36678495	chr4	97215913	97216973	chr3	119354961	119357197
			chr8	556155	557588	chr3	57363204	57365300	chr6	152142298	152145282	chr3	136039950	136041137
			chr8	1329284	1331337	chr3	138857150	138858159	chr6	152324026	152325003	chr4	12936957	12938423
			chr8	36145383	36148085	chr3	139394444	139395681	chr7	101279764	101280931	chr4	77358957	77359937
			chr8	142637727	142638935	chr3	145684998	145690339	chr7	116710326	116711277	chr5	21125470	21127759
			chr8	143446437	143449581	chr3	152467011	152467752	chr8	2187859	2189224	chr8	146684042	146685190
			chr8	144122879	144123209	chr3	152586687	152591113	chr8	14815247	14815625	chr9	7206849	7208597
			chr8	145952270	145953674	chr4	74035766	74038080	chr8	86330984	86334713	chr1	168271594	168274324
			chr9	484466	485299	chr4	127218092	127220044	chr8	105911674	105912798	chr2	27682869	27686228
			chr9	1678525	1679747	chr4	138358955	138360634	chr8	114966719	114967892	chr2	136119491	136123710
			chr9	2070369	2071501	chr4	153110238	153111031	chr8	146601496	146602166	chr2	138638665	138640426
			chr9	2580381	2585823	chr4	153641910	153642448	chr9	12700879	12702578	chr2	141039325	141042057
			chr9	2689030	2689564	chr5	1408249	1409699	chr9	18943742	18945329	chr4	91724098	91729283
			chr9	4489091	4489719	chr5	2224731	2226761	chr9	21620543	21621690	chr5	123780252	123782468
			chr9	4733805	4735276	chr5	8250471	8251335	chr1	16934307	16939701	chr5	128123652	128125453
			chr9	5476910	5478959	chr5	33347481	33350444	chr2	168406012	168407088	chr7	101279206	101280931
			chr9	22559180	22560306	chr5	38788073	38789407	chr3	132700424	132702692	chr1	25971818	25973009
			chr9	55089949	55093874	chr5	55743892	55748834	chr8	113289799	113291293	chr1	145773279	145776451
			chr9	89505035	89505814	chr5	76881162	76883796	Sca36	3260	4106	chr1	196094646	196097273
			chr1	173861950	173865430	chr5	92662902	92664712	chr1	21042554	21044303	chr10	21656689	21657980
			chr1	179524043	179525159	chr5	118455833	118459009	chr1	109326761	109327922	chr2	6685140	6686160
			chr1	191341868	191346902	chr5	125143948	125145503	chr1	211888880	211889941	chr2	135668582	135670945
			chr1	211668159	211668506	chr5	161943443	161944026	chr10	5293272	5294516	chr2	144183794	144185156
			chr1	215137741	215140720	chr6	4507764	4508456	chr10	37199700	37202283	chr2	180655833	180657138
			chr1	215154467	215156417	chr6	5054728	5055954	chr2	1497572	1501651	chr3	100700049	100701082
			chr10	10131842	10138005	chr6	5823124	5823972	chr2	86431470	86432916	chr3	104908716	104910201
			chr10	40236510	40237143	chr6	7695725	7696825	chr2	174882652	174883745	chr3	137121778	137122762
			chr10	48065936	48071734	chr6	22970483	22973110	chr3	9402584	9405168	chr4	90668057	90669615
			chr2	1649607	1651297	chr6	26467172	26468539	chr3	122436167	122437067	chr7	94265299	94267503
			chr2	3411915	3413361	chr6	119359737	119361203	chr3	152915765	152916731	chr8	44726602	44730035
			chr2	3503624	3505534	chr6	120357461	120358669	chr4	115378581	115379517	chr1	725049	727228
			chr2	14139057	14140064	chr6	151962880	151966540	chr4	143298057	143299368	chr1	40884703	40886538
			chr2	125070406	125072516	chr6	154330344	154332846	chr5	99814636	99815402	chr1	45426897	45429740
			chr2	133634654	133637182	chr7	1020021	1020787	chr5	118455779	118458998	chr1	154207097	154208372
			chr2	172330575	172331825	chr7	28681332	28682893	chr5	138141007	138143297	chr1	197935356	197936964
			chr3	1220330	1221712	chr7	94485591	94488361	chr5	161460765	161461663	chr1	205057623	205059074
			chr3	5565814	5567032	chr8	291888	292821	chr6	41103468	41105898	chr1	215210726	215211574
			chr4	5755255	5756408	chr8	503865	504569	chr6	108073473	108074016	chr2	42962760	42965170
			chr4	91179191	91182072	chr8	2457546	2458718	chr6	113140364	113143201	chr2	146931976	146932864
			chr4	129883558	129884770	chr8	2959928	2961077	chr6	117056688	117061717	chr3	90586076	90588017
			chr4	135340402	135341181	chr8	9197699	9199909	chr6	153941179	153942760	chr3	122436167	122437078
			chr5	154305485	154306899	chr8	98657932	98659523	chr7	9060027	9061229	chr3	135176756	135177563
			chr5	163965459	163965784	chr8	99750957	99753358	chr7	38146724	38147608	chr4	1112914	1113802
			chr6	4241737	4243235	chr8	127209875	127213471	chr8	16757926	16758911	chr5	98714349	98715283
			chr6	5337453	5339561	chr8	143711003	143712217	chr8	34840313	34841341	chr6	40006313	40007272
			chr6	6406994	6408055	chr9	2576968	2578524	chr8	80079665	80081073	chr6	117053857	117056462
			chr6	96181531	96182420	chr9	4526518	4527503	chr1	141993299	141994116	chr9	83903793	83905667
			chr6	152148895	152149872	chr9	4785747	4786881	chr1	181027943	181032999	chr6	139697842	139699934
			chr6	153328335	153329369	chr9	19212635	19213834	chr6	115424978	115428064	chr1	187347553	187349365
			chr6	154242107	154242869	chr9	21690445	21695210	Sca53	2277	2849	chr10	8800115	8802570
			chr7	7976276	7977276	chr9	25070942	25073698	chr1	12100568	12101566	chr2	50627126	50628782
			chr7	132946688	132947394	chr9	63576279	63577393	chr1	65304348	65306304	chr2	74871499	74872385
			chr7	133028040	133035809	chr1	113758047	113759687	chr10	49780103	49783323	chr4	117838598	117840189
			chr8	2457580	2458700	chr1	154392602	154394566	chr2	43848677	43849856	chr5	151216295	151216990
			chr8	2777253	2778550	chr2	1097730	1099381	chr2	156536493	156540161	chr6	541960	542923
			chr8	3277580	3279343	chr2	18400894	18402569	chr4	33327929	33328514	chr8	50631029	50633197
			chr8	4617187	4618179	chr2	86412175	86414855	chr4	73155936	73157960	chr8	92606756	92608559
			chr8	14242512	14242791	chr2	120791465	120794330	chr4	153062040	153062839	chr9	68421500	68422397
			chr8	99775574	99777084	chr3	78316507	78319076	chr5	8418877	8419462	Sca46	0	653
			chr8	142623116	142624383	chr3	78996211	78997950	chr5	77152346	77152985	chr1	108376096	108377244
			chr8	145186348	145187435	chr3	126872466	126873122	chr5	152485334	152486666	chr1	160154543	160156828
			chr8	146612914	146614168	chr3	147260125	147260495	chr5	154207718	154208628	chr3	4758673	4760396
			chr9	1814164	1816192	chr4	5249424	5250726	chr7	18047905	18049269	chr3	57732920	57734044
			chr9	6018036	6019428	chr4	73156000	73157851	chr7	113205105	113206032	chr3	109575174	109577038
			chr9	89427298	89429849	chr4	89655719	89658156	chr7	126476741	126477964	chr4	4502481	4503706
			chr1	278647	279728	chr4	97215791	97217122	chr7	132756999	132757984	chr4	34457988	34459024
			chr1	284240	284857	chr4	115156438	115158789	chr8	44726581	44730032	chr4	125801552	125803815
			chr1	719573	720104	chr4	128239829	128241077	chr8	132487200	132489431	chr5	111955526	111957738
			chr1	6728243	6728963	chr5	126497217	126499134	chr8	138424713	138425868	chr7	43880061	43881122
			chr1	15679380	15680161	chr5	138567036	138568073	chr8	145180584	145181877	chr8	145180606	145181875
			chr1	68328993	68330171	chr5	162436262	162437279	chr9	4732170	4733529	chr9	2563267	2564186
			chr1	104853515	104854179	chr5	162504841	162506133	chr9	24469343	24473567	chr1	142747748	142749236
			chr1	170622670	170625906	chr6	1332356	1335742	chr9	67442989	67444108	chr1	182337678	182340326
			chr10	124229	127006	chr6	5318451	5319770	chr9	89451950	89453473	chr2	75025689	75026783
			chr10	2249652	2250472	chr6	40326163	40329559	chr2	149937490	149940325	chr3	56844741	56846933
			chr10	2742602	2743579	chr6	128979173	128981292	chr3	36619135	36620373	chr4	59330826	59332088
			chr10	43872022	43874808	chr7	22231072	22234296	chr3	126931389	126934355	chr4	83567825	83569627
			chr10	49785044	49786395	chr7	93873319	93874598	chr5	21073683	21075959	chr4	122080196	122080988
			chr10	51967611	51968382	chr8	2385490	2387389	chr5	127083501	127084397	chr4	150692999	150693814
			chr2	256119	257072	chr8	2905633	2906899	chr7	26900605	26902162	chr4	153750281	153751370
			chr2	364524	365408	chr8	43379918	43382782	chr1	146838018	146839758	chr5	30489690	30491932
			chr2	412655	414468	chr9	4988960	4989829	chr1	170622679	170624650	chr7	73639982	73641791
			chr2	1647333	1649334	Sca46	16	582	chr1	205593251	205598266	chr8	107693847	107698202
			chr2	16664769	16665826	chr1	12100652	12101447	chr10	33008696	33010849	chr1	113397111	113398367
			chr2	35177868	35184901	chr1	17824607	17827516	chr10	51967530	51968441	chr1	191890051	191891371
			chr2	68639699	68642199	chr1	18065709	18067930	chr2	3224367	3225374	chr1	201469944	201471608
			chr2	173637156	173638024	chr1	81836809	81837298	chr2	9711880	9713462	chr10	44423478	44424725
			chr3	314151	314741	chr1	132587210	132588782	chr3	45767617	45768544	chr2	81448278	81449197
			chr3	1202977	1204640	chr10	25066974	25068030	chr3	151080435	151082254	chr2	141826912	141828240
			chr3	2598996	2600300	chr10	35650121	35653428	chr4	4502493	4503669	chr2	175184794	175186051
			chr3	46330430	46333920	chr10	42536298	42537881	chr4	123575873	123576830	chr3	112449525	112451661
			chr3	108677568	108680784	chr2	135616799	135618879	chr4	136186704	136189487	chr5	152163489	152164830
			chr3	139290915	139292847	chr2	151729246	151731399	chr6	142192518	142194290	chr6	144624219	144625237
			chr3	140455944	140456680	chr2	179094296	179095462	chr7	93873227	93874610	chr7	31824447	31826559
			chr3	151382299	151382976	chr3	5572602	5573377	chr8	2327565	2328972	chr7	39283795	39285345
			chr3	152176833	152177552	chr3	93305780	93307265	chr8	2871112	2872501	chr1	72542460	72543898
			chr4	12098530	12098982	chr3	138654043	138656090	chr8	55346865	55348603	chr1	81787117	81787509
			chr4	82714765	82718387	chr3	141246246	141247402	chr8	69482221	69482928	chr10	45549124	45550352
			chr4	101097037	101099147	chr3	144785563	144786468	chr8	95435397	95437788	chr2	141273736	141275018
			chr5	357386	358072	chr4	33326074	33327050	chr8	127174601	127176159	chr2	174998375	174999117
			chr6	553389	554639	chr4	37235280	37237959	chr9	4526566	4527619	chr3	2107248	2109237
			chr6	1173809	1175413	chr4	126048018	126050009	chr9	22559099	22560435	chr3	31077146	31079890
			chr6	2538297	2539817	chr4	138609913	138610877	chr9	76923353	76924412	chr3	130230230	130233075
			chr6	5261779	5263886	chr4	142004262	142005228	chr3	138745157	138745850	chr3	132204569	132205761
			chr6	6377901	6378910	chr4	151031144	151032131	chr6	5205563	5206177	chr4	59365996	59366993
			chr6	33587714	33588799	chr4	151391949	151392581	chr1	18570338	18571564	chr5	38292648	38294930
			chr6	63200398	63201765	chr5	708759	710768	chr1	25975127	25976820	chr5	138937548	138938594
			chr6	95068739	95073913	chr5	2990420	2991551	chr1	189480901	189483799	chr5	152936367	152937322
			chr6	97033199	97034508	chr5	8341149	8342373	chr2	13899028	13901569	chr6	12340124	12341717
			chr7	31020749	31022182	chr5	99349139	99350933	chr2	34226956	34228281	chr7	32250915	32254045
			chr7	73234996	73237600	chr5	122204327	122205091	chr3	130231792	130232998	chr8	78212127	78215231
			chr7	93632505	93634446	chr5	161612058	161613316	chr4	89655620	89657878	chr1	163611595	163612381
			chr7	99615213	99617099	chr6	6377880	6378889	chr4	127218030	127219701	chr10	14504981	14506271
			chr7	113252195	113252621	chr6	12609632	12612364	chr4	127900763	127902993	chr5	14918044	14919436
			chr8	708687	709957	chr6	106303414	106305754	chr4	148672448	148673422	chr6	123220873	123222508
			chr8	3144213	3145438	chr6	108764658	108767962	chr5	2415273	2416301	chr7	13189532	13191326
			chr8	6320866	6324168	chr6	128310499	128312489	chr5	154480340	154481107	chr8	44911937	44914237
			chr8	61264392	61266383	chr6	152305148	152307493	chr6	541882	543042	chr9	32586723	32587951
			chr8	127679608	127680963	chr6	154256844	154259256	chr6	115171818	115172798	chr5	151883186	151884455
			chr8	135205601	135208839	chr7	2940488	2942032	chr6	152851384	152854385	chr6	6673660	6674577
			chr8	143530200	143531700	chr7	77803648	77806258	chr7	35512003	35513226	chr6	113261011	113262380
			chr8	145224516	145226922	chr7	80405493	80407299	chr7	95020858	95022355	chr7	43898491	43899652
			chr8	146442585	146443478	chr7	91513853	91515421	chr7	99490493	99491425	chr9	22677483	22678625
			chr9	1855633	1859016	chr7	119005734	119006945	chr7	106603818	106604322	chr1	141334300	141335147
			chr9	2336833	2338248	chr7	131505607	131506799	chr8	133268297	133269696	chr10	51372265	51373281
			chr9	2577027	2578544	chr7	132653247	132654573	chr8	143552555	143553786	chr2	30637128	30638116
			chr9	2751466	2752150	chr8	529865	530577	chr8	146570783	146571545	chr2	142329059	142330329
			chr9	2987866	2988422	chr8	708694	709977	chr9	2989829	2990799	chr2	153936170	153937240
			chr9	4331996	4336068	chr8	3105141	3108446	chr9	73884326	73886244	chr3	125225348	125226682
			chr9	4346118	4349461	chr8	3271695	3273616	chr9	84650681	84651965	chr4	86430307	86432360
			chr9	5228066	5229487	chr8	6320841	6324104	Sca46	0	633	chr5	88465973	88466869
			chr9	5283983	5286754	chr8	14221378	14222009	chr1	184291055	184293163	chr5	114713250	114714610
			chr9	83828102	83829627	chr8	14510647	14511130	chr3	115564612	115568117	chr6	103854975	103857151
			chr9	83903883	83905655	chr8	103100409	103101262	chr6	5770723	5774924	chr7	107843599	107844573
			chr9	89649787	89650765	chr8	103601304	103603875	chr6	125128047	125129339	chr9	54119511	54120499
			chr9	90413776	90417398	chr8	118267035	118270916	chr8	14221354	14222120	chr1	173037061	173039442
			chr1	360403	360965	chr8	142094428	142095807	chr9	27898055	27901089	chr2	135616837	135618896
			chr1	13948781	13949967	chr8	142641391	142642598	chr1	12281546	12282717	chr2	137760510	137762423
			chr1	113759975	113761980	chr8	145168071	145168682	chr1	55278717	55279390	chr2	179215850	179216580
			chr1	171337582	171342559	chr8	145180637	145181785	chr1	55521372	55524375	chr3	112468609	112469466
			chr1	213567420	213568296	chr8	146536576	146538584	chr10	51382006	51383251	chr5	51286092	51287851
			chr10	28049098	28050409	chr9	3197622	3198905	chr10	51426586	51429166	chr5	163642670	163643523
			chr2	1667854	1670207	chr9	4803697	4804505	chr2	15650958	15651660	chr6	34260835	34262996
			chr2	3444503	3445471	chr9	5353339	5358152	chr2	45334958	45340557	chr8	81546286	81548041
			chr2	27026942	27029920	chr9	5372025	5372672	chr2	125100249	125101258	chr8	115027002	115029085
			chr2	142220005	142221976	chr9	88580087	88581297	chr2	155701892	155703504	chr9	4549973	4550816
			chr3	338772	340950	chr9	88735171	88735967	chr3	31077187	31079553	chr9	57559623	57560651
			chr3	5572639	5573408	chr1	733502	736230	chr3	64722052	64724181	chr1	202182419	202185203
			chr3	36613213	36614713	chr1	146837969	146839776	chr3	107438353	107440446	chr10	44146784	44148303
			chr3	142423966	142425209	chr1	152460483	152463949	chr3	119301439	119302315	chr4	128066653	128068356
			chr3	147009310	147016650	chr1	213208688	213209050	chr3	127330030	127330768	chr4	138557085	138559806
			chr3	151280635	151283310	chr10	5002	6185	chr3	153399413	153402520	chr4	152371524	152372946
			chr4	2205953	2207306	chr10	7366089	7368178	chr4	2497770	2498884	chr8	65186816	65187907
			chr4	2378215	2379190	chr2	140586658	140587566	chr4	119284828	119288908	chr8	115145175	115147072
			chr4	46475936	46476264	chr3	109784609	109785708	chr4	129951915	129953567	chr9	15766558	15768667
			chr4	96171354	96173115	chr3	125333464	125335231	chr5	59520675	59522455	chr9	67188464	67190042
			chr5	2570317	2574490	chr3	135244034	135246221	chr5	129620917	129621736	chr1	161382921	161383974
			chr6	1325555	1327112	chr3	138751479	138752402	chr5	152163474	152164841	chr1	165287375	165288490
			chr6	4451254	4452426	chr3	140633811	140634441	chr6	12765821	12767913	chr2	143850783	143851856
			chr6	4507765	4508424	chr3	147003928	147006612	chr6	21475334	21476351	chr3	7075739	7077306
			chr6	6467518	6468753	chr3	150945611	150946314	chr6	100232479	100234181	chr3	59032422	59033722
			chr6	6786942	6788041	chr4	9919236	9921021	chr6	106303515	106305597	chr3	72033806	72034833
			chr6	26857556	26859154	chr4	10157523	10160088	chr6	140412182	140413241	chr6	41493333	41493947
			chr6	35972323	35974775	chr4	139318538	139319367	chr6	143362188	143364494	chr1	22735317	22736486
			chr7	46909525	46911785	chr5	2797102	2798462	chr7	65994753	65995769	chr1	28453280	28454336
			chr8	526662	527127	chr5	19801222	19802434	chr7	73639960	73641685	chr2	70582658	70583823
			chr8	613853	614803	chr5	96700582	96702625	chr8	1224830	1230808	chr2	158637872	158639078
			chr8	14863234	14863578	chr5	150587947	150588591	chr8	70429752	70430440	chr2	179973105	179974341
			chr8	52782495	52787455	chr5	162453318	162456920	chr8	144152388	144153124	chr4	86083127	86084819
			chr8	137287794	137288970	chr6	7563043	7565729	chr9	2915510	2917247	chr4	148471135	148472449
			chr8	143457727	143459504	chr6	41069315	41071062	chr9	63576263	63577471	chr5	40258913	40261237
			chr8	147239220	147239715	chr6	151288822	151290232	chr9	84162685	84164119	chr6	44331429	44333631
			chr9	2058456	2058880	chr6	153952134	153953462	chr9	88734858	88736108	chr6	106430957	106432804
			chr9	2298978	2299430	chr8	556155	557617	chr1	101959533	101962949	chr7	35512371	35513270
			chr9	4278888	4280059	chr8	14246431	14246806	chr10	7496056	7496730	chr7	117621886	117623416
			chr9	4353369	4355740	chr8	61264435	61266362	chr5	163045654	163049234	chr8	104631295	104632282
			chr9	4803719	4804440	chr8	80470602	80472914	chr7	91571963	91573047	chr8	121372568	121373671
			chr9	5906885	5911177	chr8	145405970	145406818	chr9	25141462	25142352	chr9	15182948	15183792
			chr9	89441208	89442177	chr9	1868520	1869104	chr1	19641785	19643115	chr9	69124370	69125397
			Sca20	13731	15264	chr9	4800116	4802882	chr10	10661288	10662480	chr1	40929700	40931402
			Sca83	2033	3514	chr9	5711970	5713133	chr2	1633339	1634390	chr1	79046540	79047929
			chr1	17238292	17239381	chr9	12666245	12667402	chr3	147268128	147269098	chr1	140455825	140458300
			chr1	197208981	197210473	Sca36	11376	12959	chr4	6943228	6944771	chr1	178926424	178927528
			chr1	212902961	212904113	chr1	21166731	21169481	chr4	67876186	67877085	chr10	146173	147033
			chr1	212945654	212946851	chr1	35410730	35411469	chr4	153567298	153568266	chr10	25067024	25068051
			chr1	215916016	215916730	chr1	55521668	55524387	chr5	22426	23674	chr2	137439800	137441857
			chr10	466944	468467	chr1	135138478	135142158	chr5	26474	28047	chr3	107537871	107539207
			chr10	3107056	3107640	chr1	136219594	136220766	chr5	106033025	106033836	chr3	131861580	131863145
			chr10	43370941	43371722	chr1	153756156	153757633	chr7	110614821	110616278	chr4	113582006	113583245
			chr2	306068	307280	chr1	154635537	154637682	chr7	129501477	129502745	chr5	74163945	74165413
			chr2	23124043	23129889	chr1	182033272	182034925	chr8	519649	523062	chr5	159573496	159574136
			chr2	32120032	32121514	chr1	216157440	216158074	chr8	38918567	38920627	chr5	161502977	161504997
			chr2	130782715	130783647	chr10	2279299	2280051	chr8	59947350	59948042	chr8	142032798	142034807
			chr2	135188941	135190455	chr10	10890439	10891961	chr8	71278569	71280210	chr9	66459753	66462141
			chr2	156452509	156453429	chr10	11701708	11702840	chr10	46667380	46668285	chr1	13751931	13752830
			chr2	174975667	174977994	chr10	44146825	44148303	chr10	51309549	51310573	chr1	183966701	183968451
			chr2	175655986	175656639	chr10	46980521	46981098	chr3	138861752	138863113	chr1	197209201	197210492
			chr2	179014397	179017402	chr10	48127402	48130008	chr4	112212094	112213495	chr3	125759146	125760993
			chr2	179088224	179089101	chr2	14782753	14783525	chr8	474825	476914	chr4	74035761	74038059
			chr3	2222008	2222710	chr2	50713434	50714596	chr8	88154998	88156240	chr5	55945192	55947958
			chr3	2576933	2578611	chr2	125592761	125596242	chr9	4716060	4716832	chr5	102890828	102891958
			chr3	4732357	4733276	chr2	170685578	170687005	chr1	76931779	76934891	chr6	5831449	5833381
			chr3	4738206	4739694	chr3	4752541	4755845	chr1	177197407	177198307	chr6	124023920	124024634
			chr3	9820078	9821701	chr3	123119336	123121183	chr1	197209239	197210488	chr6	130994232	130995517
			chr3	103420266	103421938	chr3	134010600	134011738	chr1	197930129	197931933	chr8	95603584	95605360
			chr3	134025729	134029959	chr3	141288993	141291887	chr10	2255695	2259747	chr8	107852154	107854224
			chr3	138745158	138746736	chr3	141296743	141298397	chr10	7501546	7502965	chr8	138329733	138330625
			chr3	151615131	151617918	chr3	151064546	151065522	chr2	47414579	47416460	chr1	162346701	162348310
			chr3	153777689	153781176	chr3	152333695	152336799	chr3	11769802	11770788	chr3	39744652	39746103
			chr4	3055948	3056279	chr3	153378099	153378788	chr3	22876083	22877656	chr3	61571947	61573348
			chr4	9974780	9975951	chr3	153399474	153402223	chr3	26544102	26546234	chr3	115129317	115130214
			chr4	33327300	33327660	chr4	9766780	9768810	chr3	40268703	40271442	chr3	126931335	126934446
			chr4	34933713	34934166	chr4	24230743	24235256	chr3	40284317	40286860	chr4	36203372	36204596
			chr4	90942764	90944444	chr4	34711465	34711998	chr3	140457735	140458618	chr5	125719658	125721444
			chr4	111642880	111645644	chr4	35020992	35021369	chr4	14555397	14558171	chr6	107061417	107063294
			chr4	122335846	122338187	chr4	92463306	92465180	chr4	120125272	120126250	chr6	108575725	108578186
			chr4	153062049	153062830	chr4	135646878	135649113	chr4	120699917	120701554	chr6	112389756	112391462
			chr5	26540	27741	chr5	9561013	9562594	chr5	32916342	32919717	chr6	151252357	151253274
			chr5	1427203	1430989	chr5	24277255	24278930	chr5	38292643	38294901	chr7	116716766	116717695
			chr5	1444118	1445260	chr5	87074644	87076877	chr5	132390952	132391850	chr8	68369937	68374198
			chr5	65897254	65897807	chr5	122147220	122148617	chr6	4426014	4427378	chr8	108268490	108269917
			chr5	108035874	108038962	chr5	132400770	132402810	chr6	93113339	93115392	chr1	74376067	74377776
			chr5	161931137	161932227	chr5	145509549	145510770	chr7	117491133	117492494	chr1	139714255	139715578
			chr5	162391866	162393178	chr5	161767936	161770276	chr8	587598	589352	chr1	205593261	205598212
			chr6	1343666	1345491	chr6	3838853	3839470	chr8	2790458	2791178	chr1	215763171	215763975
			chr6	1389522	1390074	chr6	4046970	4048094	chr8	59607475	59610646	chr2	147065090	147065980
			chr6	3137480	3137971	chr6	41504641	41505299	chr8	104116765	104118131	chr2	156785701	156786523
			chr6	4302336	4303786	chr6	81113764	81119502	chr9	73886484	73890407	chr3	89503462	89504907
			chr6	4397156	4397893	chr6	89069287	89070994	chr9	77110932	77111670	chr4	2497793	2498821
			chr6	21482945	21485959	chr6	93009854	93012729	chr10	34569437	34570529	chr4	4285305	4286083
			chr6	152277612	152278018	chr6	153135978	153137849	chr3	147033272	147034911	chr4	121759504	121761542
			chr6	152448850	152449402	chr6	154063923	154064870	chr4	100273501	100275535	chr4	141908216	141909731
			chr7	2630602	2631668	chr7	1000488	1001643	chr5	2247758	2249405	chr4	148529843	148531513
			chr7	2868295	2869349	chr7	9553057	9554240	chr5	145862218	145863092	chr6	67766175	67767815
			chr7	9827080	9828125	chr8	1339322	1340171	chr9	15364573	15365976	chr7	2885270	2886407
			chr7	91567908	91568993	chr8	2751115	2755593	Sca36	16609	18570	chr7	50290300	50290965
			chr7	105142057	105142371	chr8	3299648	3302512	chr1	161763366	161764823	chr9	4724658	4725374
			chr8	4191480	4192958	chr8	13391000	13391322	chr1	189443476	189444167	chr2	14932671	14933472
			chr8	6247891	6249516	chr8	96545590	96548044	chr1	191446351	191448603	chr2	149501763	149504065
			chr8	17814816	17815648	chr8	118525924	118526812	chr1	213952246	213952949	chr3	89188134	89190651
			chr8	58738374	58740022	chr8	119240310	119241677	chr2	132394800	132395994	chr3	98178838	98179965
			chr8	146687556	146689742	chr8	143545457	143546121	chr2	139126100	139129033	chr4	76766759	76768373
			chr9	1852261	1852707	chr8	146370880	146371877	chr2	179215807	179216574	chr4	86081766	86082827
			chr9	2326529	2328092	chr8	146572389	146573846	chr3	3113423	3114718	chr5	133811560	133812731
			chr9	2694752	2696040	chr8	146809846	146810582	chr3	20342703	20346652	chr6	39500684	39501376
			chr9	5710924	5711517	chr9	2546568	2548335	chr3	76991114	76992728	chr7	9060158	9061199
			chr9	5861895	5869492	chr9	2868872	2870368	chr3	83635219	83636479	chr7	109128502	109129866
			chr9	25043202	25046431	chr9	3161385	3162653	chr3	130520840	130522803	chr7	117380699	117382333
			chr9	77215335	77216175	chr9	4097367	4097920	chr3	138084364	138085190	chr8	92536650	92537233
			chr9	88121348	88122991	chr9	5177130	5178326	chr3	138092780	138095662	chr8	92827362	92829166
			chr9	90276108	90278736	chr9	5894944	5897454	chr3	152393672	152395354	chr8	112946467	112949285
			chr1	331007	332386	chr9	15969722	15970844	chr4	2294320	2295865	chr1	65304394	65306380
			chr1	167458711	167459875	chr9	24471676	24473564	chr4	115560040	115561507	chr1	176132150	176133401
			chr10	243205	243701	chr9	55090168	55093880	chr4	148924974	148928587	chr1	211888813	211889977
			chr2	1478700	1479251	chr9	90833333	90834274	chr5	2990325	2991767	chr10	7432731	7435118
			chr2	1533201	1535807	chr1	6694258	6695782	chr5	19801276	19802519	chr2	318225	319658
			chr2	11736530	11737697	chr1	30149607	30150783	chr7	26982561	26983642	chr2	53952793	53954214
			chr2	133936735	133938531	chr1	147441844	147443211	chr7	104151575	104156288	chr3	90872165	90875371
			chr2	151729243	151730711	chr1	173861853	173864702	chr7	104933652	104936399	chr5	31394925	31396934
			chr2	178925126	178926012	chr10	49823817	49824350	chr7	128965567	128968599	chr6	43931195	43933488
			chr2	180668916	180670553	chr10	51191991	51192815	chr7	131516844	131520700	chr6	93009795	93011207
			chr3	569022	570092	chr10	51580056	51580475	chr7	131882654	131884043	chr7	32993104	32994657
			chr3	1217831	1218898	chr2	1126506	1128243	chr8	2905534	2906973	chr7	88045300	88046265
			chr3	36616657	36618139	chr2	30400759	30402433	chr8	9890222	9892555	chr7	107155431	107157123
			chr3	126768173	126770148	chr2	134858627	134859792	chr8	25036722	25040818	chr8	468041	469162
			chr3	144327522	144328652	chr3	36586065	36587009	chr8	138430502	138433843	chr9	86478470	86479615
			chr3	152342608	152343313	chr3	39744698	39746330	chr8	145907586	145908997	chr1	154011254	154013512
			chr3	153348502	153349081	chr3	114681301	114683132	chr9	5191242	5192222	chr2	30672533	30673531
			chr4	19795828	19796837	chr3	125261056	125263569	chr9	50077367	50078739	chr2	139126790	139128688
			chr4	125318164	125320950	chr4	1098675	1099226	chr9	83828011	83829776	chr3	57146064	57147890
			chr4	127218088	127219601	chr4	5262613	5265073	chr10	48105328	48106829	chr3	71410102	71412000
			chr4	127900342	127902833	chr4	128037621	128039791	chr2	127181	128192	chr3	130941955	130942782
			chr5	6009123	6012739	chr4	141967762	141970070	chr3	125260974	125263450	chr3	132789641	132791253
			chr5	96570457	96572141	chr5	18002875	18004349	chr4	33510147	33510567	chr4	21037352	21038464
			chr5	135307062	135308305	chr5	28101696	28102741	chr8	3284412	3285042	chr4	34325743	34327741
			chr5	150587998	150588565	chr5	160079241	160080658	chr8	94575631	94578674	chr4	62787728	62788809
			chr5	154271744	154272493	chr6	116184963	116186901	chr1	113757992	113759731	chr5	19138378	19140137
			chr5	159513231	159515160	chr6	152287090	152288044	chr10	736691	738477	chr6	127088645	127090555
			chr5	163050144	163051733	chr7	16856872	16859972	chr10	6061346	6062122	chr7	93657664	93659685
			chr6	435928	436454	chr7	43880066	43880915	chr10	21656674	21658016	chr9	2773019	2774326
			chr6	2552302	2553048	chr7	104042473	104044536	chr10	40328843	40330286	chr1	62131314	62133776
			chr6	152324098	152324935	chr8	10558994	10560165	chr10	51907376	51908023	chr1	205016873	205018242
			chr6	153945593	153947243	chr8	12236041	12236814	chr2	15544045	15549958	chr3	108436289	108440036
			chr7	4218441	4219470	chr8	105839815	105841190	chr2	78145190	78146902	chr3	140346967	140352374
			chr7	128883900	128885030	chr8	143464163	143466835	chr2	95412455	95413397	chr4	143473727	143475567
			chr7	131536041	131537855	chr9	1853608	1854259	chr2	157782991	157783963	chr5	8136041	8137067
			chr8	3310284	3312002	chr9	2716507	2717316	chr3	4734655	4736931	chr5	45181825	45184223
			chr8	14727202	14727516	chr9	5616061	5617369	chr3	115329684	115331331	chr6	68198854	68201392
			chr8	141571955	141572682	chr9	21253118	21254385	chr3	125207396	125208910	chr6	131635187	131638041
			chr8	142192993	142195335	chr9	52315444	52316496	chr4	4142449	4143703	chr7	99546091	99547713
			chr8	142735315	142736301	chr9	54482916	54483948	chr4	5755159	5756494	chr9	21500632	21501449
			chr8	144342882	144344473	chr9	88007857	88008959	chr4	22349283	22355151	chr4	74783316	74784243
			chr9	2056694	2057375	chr9	89443745	89444384	chr4	31581828	31583194	chr1	206666443	206667641
			chr9	2403759	2404314	Sca4	37618	38904	chr4	135646142	135649243	chr2	137527483	137529517
			chr9	2838160	2839161	chr1	15679383	15680163	chr5	13506319	13506847	chr3	4730215	4730875
			chr9	4272751	4274074	chr1	67838936	67840237	chr5	20052237	20053274	chr3	91497711	91499343
			chr9	5328188	5332321	chr1	147409494	147410848	chr5	75839371	75841461	chr3	119334709	119336207
			chr9	88580110	88581298	chr1	201925575	201927033	chr5	126728542	126729592	chr3	125235618	125237324
			chr1	6723775	6725000	chr10	2446606	2449079	chr6	32115398	32115907	chr4	100843242	100844151
			chr1	15770461	15771977	chr10	10729947	10731580	chr6	151252259	151253283	chr6	116424650	116425632
			chr1	101878265	101879723	chr10	28472711	28474527	chr7	2945426	2946371	chr7	117683211	117684492
			chr1	212901783	212902499	chr10	36288911	36290374	chr8	1768306	1769477	chr9	74473038	74475162
			chr10	736769	738423	chr10	51390879	51392073	chr8	2791294	2792723	chr3	121246379	121247414
			chr10	46982170	46982864	chr2	98566	102117	chr8	3262515	3264351	chr2	172679929	172680876
			chr10	51390918	51392059	chr2	1538415	1539094	chr8	55348842	55350877	chr3	1207317	1208103
			chr10	52015712	52016719	chr2	1598971	1600880	chr8	66551055	66552570	chr3	152616474	152617584
			chr2	2804595	2806923	chr2	9697796	9699943	chr8	99750947	99753464	chr4	3467875	3468705
			chr2	142175703	142177819	chr2	76044648	76046009	chr8	143524567	143525455	chr4	22891010	22892298
			chr2	168414743	168416564	chr3	727022	728443	chr9	2056674	2057418	chr4	34408256	34409001
			chr2	174068902	174069991	chr3	2212471	2213147	chr9	4751030	4752367	chr4	74642664	74644479
			chr2	179094322	179095477	chr3	40268687	40271411	chr9	19366895	19368739	chr4	126364917	126366211
			chr2	179147465	179151758	chr3	56045399	56047587	chr4	36991627	36993190	chr4	148672384	148673242
			chr3	313061	313409	chr3	93382658	93386325	chr9	5334157	5335444	chr5	106346925	106348785
			chr3	932996	933877	chr3	93895380	93897119	chr1	56768364	56771134	chr5	129620872	129621740
			chr3	3091653	3093050	chr3	103362867	103364230	chr1	62131350	62133743	chr5	137440270	137447581
			chr3	9822344	9823529	chr3	125235674	125237330	chr1	74376043	74377777	chr6	40326151	40329570
			chr3	36609339	36612225	chr3	126768047	126770347	chr1	118645724	118646936	chr6	101644718	101645645
			chr3	135253174	135254533	chr3	137121711	137122683	chr1	176675914	176677304	chr7	91254959	91258388
			chr3	135264374	135266928	chr3	137647283	137649229	chr1	216156889	216158384	chr8	22811409	22815142
			chr3	141223378	141226221	chr3	138194086	138195261	chr1	216510739	216511822	chr8	118575359	118577522
			chr3	147621218	147624047	chr3	144210530	144212327	chr10	44146749	44148389	chr1	177018230	177021535
			chr3	151064629	151065920	chr3	144705606	144707241	chr2	164688659	164691032	chr2	139218182	139219653
			chr3	152330395	152332739	chr3	151085691	151087592	chr2	179082861	179085500	chr2	151897821	151899728
			chr4	2299341	2300940	chr3	153395518	153398902	chr3	3047572	3049141	chr3	11769977	11770783
			chr4	9977150	9978955	chr4	6871623	6872798	chr3	3049906	3054604	chr3	41978361	41980853
			chr4	138358913	138360701	chr4	16014910	16015510	chr3	132539209	132540588	chr3	69853125	69854528
			chr4	148672650	148673225	chr4	24533916	24535019	chr3	138830046	138831224	chr3	121607799	121610182
			chr4	153644260	153645036	chr4	37842381	37846763	chr4	134943139	134944535	chr3	138290736	138291843
			chr5	22871	23552	chr4	39464831	39465126	chr4	150843120	150844088	chr4	2317971	2319512
			chr5	719625	721123	chr4	48788841	48791174	chr5	35579644	35580770	chr4	30706760	30708229
			chr5	2219800	2222113	chr4	51567870	51569278	chr5	93094891	93096023	chr4	97550632	97551937
			chr5	13501103	13502629	chr4	58768287	58769547	chr5	138090172	138092444	chr4	115050265	115051904
			chr5	161704091	161704603	chr4	96347055	96349158	chr6	4861773	4862817	chr4	148924974	148928568
			chr5	162279909	162281819	chr4	119244526	119245542	chr6	40199284	40200418	chr5	31851476	31852861
			chr5	163594680	163595072	chr4	120125205	120126294	chr6	103722643	103724025	chr5	141765687	141767080
			chr6	2885874	2887183	chr4	120699459	120701655	chr6	152148849	152149945	chr5	152480562	152482708
			chr6	4239758	4241612	chr4	127207946	127209359	chr7	46909675	46911815	chr5	160235385	160236745
			chr6	5192386	5193526	chr5	2372130	2373385	chr7	116716844	116717548	chr6	125128148	125129301
			chr6	5205620	5206096	chr5	6007140	6008648	chr8	1329192	1331390	chr7	10004944	10013935
			chr6	5213844	5216624	chr5	44968239	44969371	chr8	78527372	78528944	chr9	2667572	2668683
			chr6	5306928	5309479	chr5	92722519	92722957	chr9	2338725	2339927	chr1	185627199	185628011
			chr6	50334039	50337202	chr5	122439351	122440873	chr9	74473096	74475278	chr10	5293267	5294428
			chr6	153957171	153958541	chr5	129620953	129621677	chr2	120401872	120403075	chr10	27632771	27633914
			chr6	154337757	154338319	chr5	137442368	137446331	chr2	155092657	155093322	chr10	46840503	46841508
			chr7	108084983	108085315	chr5	150559217	150560620	chr3	117262532	117265719	chr2	43019289	43020420
			chr7	130079854	130082235	chr5	161372636	161373306	chr3	139295111	139296358	chr2	53710297	53711657
			chr7	132891354	132894095	chr5	162433048	162434867	chr4	13611892	13615215	chr2	90314299	90316016
			chr7	132947709	132950098	chr5	163045690	163049201	chr4	139368934	139371184	chr3	4388125	4389032
			chr8	1345343	1347031	chr6	4059387	4060791	chr5	143336500	143338068	chr3	5333599	5334937
			chr8	2846928	2848946	chr6	9326628	9327558	chr6	89093700	89095312	chr3	147063759	147064724
			chr8	12160649	12161576	chr6	12508425	12509112	chr7	80726174	80727630	chr3	151080679	151082309
			chr8	68371073	68373534	chr6	12622624	12623638	chr8	14863218	14863804	chr6	147736134	147737111
			chr8	83282279	83284583	chr6	60194510	60197179	chr1	26338029	26339607	chr7	47506311	47507485
			chr8	143453630	143455467	chr6	68198981	68201185	chr1	153871417	153873631	chr7	132162817	132163691
			chr8	143503118	143504201	chr6	96064549	96066009	chr1	173036862	173038996	chr9	55840934	55841330
			chr8	145333138	145333987	chr6	110905374	110905684	chr10	51191899	51192895	chr3	26780407	26782882
			chr9	437306	437634	chr6	152119831	152121897	chr2	15697267	15700946	chr1	31503783	31504750
			chr9	582294	582929	chr6	153954349	153954933	chr2	21813158	21814032	chr1	74037477	74038911
			chr9	1840180	1843302	chr7	2866052	2867465	chr2	46068036	46071499	chr1	117275464	117276479
			chr9	2323930	2325130	chr7	2926552	2929518	chr2	175148544	175151350	chr1	144622149	144623438
			chr9	2565211	2566175	chr7	9975859	9978130	chr3	71410442	71411591	chr10	48105404	48106797
			chr9	3161427	3162645	chr7	81714429	81716432	chr3	100582867	100584709	chr2	2927576	2930144
			chr9	5177145	5178312	chr8	507680	508137	chr3	112550506	112552403	chr2	14228924	14231335
			chr9	5288229	5290663	chr8	517326	518499	chr3	140468103	140470419	chr2	159084880	159086456
			chr9	13572651	13573345	chr8	2381446	2383749	chr4	4457239	4461097	chr5	21073683	21075649
			chr9	89504199	89504753	chr8	2873064	2873676	chr4	10157528	10160111	chr5	21188196	21190022
			chr1	207384	208421	chr8	12258184	12259263	chr4	14324454	14325552	chr6	146811103	146812177
			chr1	16946226	16947226	chr8	16406890	16407311	chr4	18649661	18651176	chr7	6328197	6329227
			chr1	40929475	40931311	chr8	46469756	46471274	chr4	114610045	114611241	chr8	37498522	37500500
			chr1	48870759	48874740	chr8	51235245	51236181	chr5	126497230	126499363	chr8	73549515	73550621
			chr1	56768415	56771205	chr8	95280905	95282921	chr5	150640310	150642039	chr8	92549180	92549968
			chr1	216575962	216577266	chr8	143542058	143542550	chr7	1073363	1075141	chr8	115720756	115722409
			chr10	1281371	1283121	chr8	144368692	144369548	chr7	25602186	25603406	chr8	144735650	144736401
			chr10	2551132	2552173	chr8	146442560	146443495	chr8	529760	530596	chr9	4785813	4786801
			chr10	14505117	14506688	chr9	2556832	2557332	chr8	6616764	6619281	chr9	22529167	22530799
			chr10	15296115	15297360	chr9	2988949	2989271	chr9	2964358	2965177	chr9	68445561	68447695
			chr10	44468808	44470389	chr9	20434677	20437725	chr9	5609147	5610570	chr9	74483410	74484690
			chr10	51884281	51885718	chr9	28142965	28144508	chr9	13829839	13830675	chr1	142906848	142908366
			chr2	1601181	1602799	chr9	55706560	55707790	chr9	65656294	65658149	chr1	162285810	162288541
			chr2	2134957	2135927	chr9	68621186	68623025	chr9	72698616	72701579	chr1	166665232	166667275
			chr2	4073426	4074546	chr1	120684976	120687391	chr9	90833308	90834433	chr10	52235783	52236500
			chr2	7578632	7580189	chr1	131669124	131671177	chr1	111171051	111172290	chr3	60003143	60003785
			chr2	9711863	9713430	chr1	179524114	179525080	chr10	41035602	41036504	chr3	132782087	132783438
			chr2	114858690	114862099	chr10	38108113	38109559	chr2	15584361	15585947	chr4	65385192	65386724
			chr2	165859828	165861476	chr10	51581766	51582765	chr3	8813789	8815330	chr4	115614028	115615545
			chr2	180989668	180989973	chr2	76135585	76138174	chr3	36689560	36691233	chr5	2435363	2436824
			chr3	2349649	2353075	chr2	83644876	83646204	chr3	104947829	104949495	chr6	142192742	142194327
			chr3	19767674	19772760	chr2	92901289	92902911	chr4	39484345	39484715	chr8	132487192	132489161
			chr3	121284576	121287045	chr3	8065726	8066679	chr4	115050221	115051833	chr9	82248353	82249631
			chr3	135663601	135663938	chr3	126673159	126674750	chr6	1332310	1335797	chr1	29251426	29253422
			chr3	139720769	139723528	chr3	144631564	144632819	chr6	97289336	97291388	chr1	101457033	101458641
			chr3	141220692	141221397	chr4	6954721	6956908	chr8	80628080	80631648	chr1	211306566	211307968
			chr3	146969074	146969772	chr4	9974828	9975904	chr8	137273497	137275412	chr2	104893299	104895844
			chr3	147550567	147552768	chr4	125801534	125803863	chr9	3579955	3583480	chr2	111888107	111890514
			chr3	153492008	153493605	chr4	151394463	151396257	chr1	72569956	72571040	chr2	171760454	171761561
			chr4	2506452	2507082	chr5	65006395	65008807	chr1	144622219	144623383	chr3	81271472	81273383
			chr4	6954708	6956847	chr5	162558146	162558831	chr1	162285918	162288503	chr3	105986098	105986834
			chr4	12290536	12291143	chr6	4226347	4228018	chr1	162690795	162692917	chr4	96347578	96349220
			chr4	39463559	39464165	chr6	5431814	5432360	chr1	187605472	187607319	chr5	75839279	75841160
			chr4	44468341	44469027	chr6	26363635	26365762	chr10	36198248	36199692	chr8	73828223	73830665
			chr4	148022492	148025425	chr6	115737647	115739904	chr2	90858327	90861484	chr1	17954464	17955446
			chr5	716476	719287	chr7	2963763	2964993	chr2	174491573	174493236	chr1	137845805	137847611
			chr5	5731127	5731964	chr7	18047946	18048448	chr3	8394529	8396137	chr1	198042066	198044552
			chr5	38103076	38103389	chr7	133198693	133200829	chr3	50272857	50274134	chr10	40329407	40330266
			chr5	86103082	86103370	chr8	1778986	1780530	chr3	67947772	67949217	chr2	157913801	157914796
			chr6	4336886	4337693	chr8	101417980	101418933	chr3	103420162	103421952	chr2	175655271	175656733
			chr6	5267647	5268013	chr8	102415202	102417030	chr3	127988708	127990467	chr3	82443368	82444735
			chr6	110851814	110852839	chr8	110835858	110837279	chr3	135663534	135664041	chr3	89328168	89329796
			chr6	153828671	153830365	chr8	118108789	118110979	chr3	140431518	140434201	chr4	88516475	88518423
			chr6	153944081	153944814	chr8	118599454	118601497	chr3	152578739	152591360	chr4	126304854	126307305
			chr7	25966065	25967347	chr8	141319959	141321387	chr4	12893009	12895312	chr4	128816249	128817575
			chr7	99634990	99637132	chr9	4753290	4754242	chr4	135407515	135408257	chr8	118525763	118526850
			chr7	128819912	128822437	chr9	5887467	5888694	chr4	135643799	135645923	chr9	22812199	22813621
			chr7	131885518	131886468	chr9	89502028	89502979	chr4	138164746	138166504	chr1	173330842	173332769
			chr8	570801	571659	chr1	36221039	36222529	chr5	352615	353539	chr1	169410190	169411127
			chr8	2605856	2607437	chr1	48656372	48658036	chr6	6377844	6378903	chr2	43251306	43253340
			chr8	3495587	3496340	chr1	49896717	49899318	chr6	6462647	6464588	chr3	69601696	69602653
			chr8	4603928	4604645	chr1	61009399	61011011	chr6	14875903	14876679	chr3	130521432	130522814
			chr8	14374462	14374799	chr1	68902269	68903757	chr6	46327401	46328799	chr4	52845745	52847457
			chr8	20458219	20458534	chr1	144359896	144361643	chr7	2822936	2824047	chr4	101475336	101476391
			chr8	79882116	79885488	chr1	162157686	162159864	chr7	21337556	21338900	chr4	127910948	127912856
			chr8	84955436	84958706	chr1	184194922	184195983	chr7	99548328	99551803	chr5	2817515	2818684
			chr8	86331264	86334329	chr1	215954906	215955751	chr7	107544211	107545703	chr5	123825788	123827577
			chr8	86961489	86963278	chr10	243212	243713	chr8	73956058	73957054	chr5	125954800	125955999
			chr8	118118742	118119947	chr10	2401655	2402711	chr8	83794797	83795670	chr6	9326571	9327662
			chr8	137289482	137289927	chr10	2403718	2404451	chr8	112497061	112497771	chr6	55074380	55075423
			chr8	142627811	142633679	chr10	3038911	3043143	chr8	127711615	127712812	chr6	113140304	113143028
			chr8	143562109	143563491	chr2	1597219	1597637	chr8	144715182	144716079	chr6	115424848	115427827
			chr9	972140	972809	chr2	3501280	3502038	chr9	4564346	4565470	chr6	144150511	144151320
			chr9	2073556	2074613	chr2	7417736	7418723	chr1	84979382	84981105	chr7	107392134	107393565
			chr9	2345942	2346767	chr2	55839463	55842867	chr2	76135563	76138236	chr8	92575288	92576697
			chr9	5379554	5381249	chr2	114811768	114813933	chr3	126723216	126727409	chr1	147070778	147072289
			chr9	5622292	5623362	chr2	155805691	155808174	chr4	21898332	21899544	chr1	187604625	187607226
			chr9	5701037	5702315	chr2	156506698	156509342	chr4	151391917	151392623	chr3	5558217	5558995
			chr9	5744637	5747017	chr2	164689067	164691019	chr6	5060214	5061001	chr3	94473269	94474831
			chr9	15703451	15706726	chr2	172679951	172680811	chr6	134096669	134097151	chr3	148516177	148517300
			chr9	86325438	86327026	chr2	174094054	174095716	chr7	37391312	37393231	chr4	97653968	97654667
			chr9	89502044	89502956	chr2	178925110	178925994	chr7	110751616	110752501	chr4	130140373	130141888
			chr1	6726415	6726947	chr2	179973204	179974170	chr1	17207805	17209394	chr5	71253945	71258055
			chr1	15562689	15570407	chr3	2635218	2636949	chr1	17954320	17955431	chr7	21337512	21338885
			chr1	178160091	178161109	chr3	4730290	4730838	chr1	25167503	25169723	chr8	480481	481686
			chr1	191493203	191494331	chr3	10010893	10018783	chr1	114254329	114256124	chr8	59947318	59948101
			chr1	206718949	206720238	chr3	26292908	26293569	chr1	114536220	114537024	chr8	79882437	79885639
			chr1	216251225	216251834	chr3	33686271	33688202	chr1	117272558	117273670	chr9	12488844	12490492
			chr10	1422371	1423660	chr3	36702288	36702860	chr1	179523972	179525872	chr3	144785506	144786550
			chr10	44146875	44148315	chr3	39865041	39866278	chr10	2750427	2752250	chr1	21046735	21050231
			chr10	51191990	51192780	chr3	59167347	59168341	chr10	47343701	47344881	chr1	35813602	35814791
			chr10	52068834	52069624	chr3	125207332	125208931	chr2	317672	319631	chr1	79454170	79455583
			chr2	266919	269295	chr3	138760517	138761119	chr2	7407901	7410213	chr2	91334387	91335475
			chr2	1660282	1660873	chr3	139283314	139284851	chr2	168857964	168860238	chr2	177465329	177467427
			chr2	1686221	1691170	chr3	140346958	140352269	chr3	3579488	3581097	chr3	9402757	9405031
			chr2	43747703	43748059	chr3	150978679	150979796	chr3	47506714	47508001	chr5	6577099	6578397
			chr2	104634827	104636937	chr3	150980537	150981058	chr3	125054699	125056675	chr5	50502682	50505116
			chr2	111463290	111468080	chr3	151823062	151823688	chr4	4196342	4197235	chr5	101914846	101916585
			chr2	118478362	118481296	chr3	152369622	152370748	chr5	2845621	2846795	chr5	138141013	138143274
			chr2	133553555	133554365	chr3	152514837	152516109	chr5	9894685	9895919	chr5	145522960	145524899
			chr2	149501768	149504642	chr3	152580094	152586502	chr5	21187891	21190093	chr5	160054371	160055704
			chr2	172012348	172013834	chr4	5246848	5247464	chr5	27874361	27875882	chr6	34547139	34549572
			chr2	173854847	173861336	chr4	5755245	5756426	chr5	111955582	111957232	chr6	108764467	108767885
			chr3	152027	153192	chr4	19779794	19780281	chr5	123780389	123782469	chr7	130342697	130344455
			chr3	3052313	3054574	chr4	37007877	37008915	chr5	143548187	143549821	chr8	108603755	108605473
			chr3	3946740	3948195	chr4	91411148	91412163	chr6	122571999	122573137	chr8	115700106	115701170
			chr3	4172402	4173490	chr4	115050210	115051787	chr6	152119753	152121901	chr8	145952194	145953733
			chr3	19902390	19903808	chr4	136933176	136934122	chr7	41405481	41407903	chr9	83153564	83154629
			chr3	135801257	135804847	chr4	148527603	148531275	chr7	90022400	90023270	chr9	86348846	86349786
			chr3	144624102	144626788	chr4	153567354	153568200	chr7	90553362	90555071	chr1	182234971	182236222
			chr3	144651554	144653635	chr4	153695692	153696538	chr7	117986435	117987974	chr10	10836378	10838531
			chr3	147544416	147547780	chr5	89	1276	chr8	77046402	77050127	chr2	9620920	9621661
			chr4	4196498	4197197	chr5	721879	723109	chr8	88356281	88357112	chr3	94602548	94604485
			chr4	35014072	35015958	chr5	8923711	8924303	chr8	101007022	101008070	chr3	138194100	138195252
			chr4	148183074	148185626	chr5	14918107	14919376	chr8	113046497	113049296	chr3	140457804	140458556
			chr4	153684899	153686358	chr5	21188327	21190022	chr8	117863899	117864520	chr4	67038556	67039946
			chr4	153750256	153751300	chr5	27625669	27627471	chr9	15972331	15973361	chr4	91166491	91168152
			chr5	1089977	1090742	chr5	32716180	32717983	chr10	50629286	50630545	chr5	19801188	19802501
			chr5	1403208	1403799	chr5	116207661	116209039	chr4	128084779	128085802	chr6	108118836	108120265
			chr5	2645949	2647069	chr5	118796210	118797573	chr8	40689127	40690702	chr7	55385137	55386406
			chr5	2798886	2800283	chr5	119960727	119965223	chr1	15611508	15612175	chr7	114820987	114822437
			chr5	7744486	7745291	chr5	138937579	138938502	chr1	72542482	72543878	chr8	82210883	82211640
			chr5	8123132	8124030	chr6	1390628	1392002	chr1	97796320	97798386	chr8	82408747	82409430
			chr5	8341142	8342386	chr6	5110202	5111300	chr1	216169939	216170531	chr8	83282129	83284385
			chr5	10396213	10397541	chr6	21611155	21612276	chr10	10781798	10782684	chr3	70365181	70366762
			chr5	100846404	100849303	chr6	24831298	24833599	chr2	92901237	92902954	chr1	27740737	27748967
			chr5	126747534	126753949	chr6	41662212	41666299	chr2	104805457	104806560	chr1	78780551	78781411
			chr5	132400780	132402825	chr6	96093141	96093511	chr2	112271330	112273211	chr1	168145817	168147165
			chr5	161833988	161835306	chr6	104633192	104634491	chr2	134899407	134901819	chr10	18647522	18649348
			chr5	162109144	162111767	chr6	113140426	113142967	chr2	148968152	148969348	chr3	12093525	12095088
			chr6	4459627	4460398	chr6	146730358	146731724	chr2	155089626	155090856	chr3	126209138	126210101
			chr6	4470064	4472150	chr6	153314356	153315456	chr2	177334120	177334770	chr3	147540917	147542066
			chr6	5210286	5210960	chr7	2630564	2631651	chr3	90586747	90588066	chr3	151390213	151391814
			chr6	5311679	5312177	chr7	2945485	2946246	chr3	125235582	125237336	chr4	52528704	52530794
			chr6	6732413	6734087	chr7	17927196	17929518	chr3	129467704	129469663	chr4	92252174	92253550
			chr6	13274424	13276289	chr7	25222476	25224568	chr4	74046404	74048826	chr4	110885389	110886868
			chr6	23058509	23061310	chr7	127387795	127390883	chr4	143473827	143475758	chr4	150842954	150844148
			chr6	27218433	27221558	chr7	130341832	130344373	chr5	9589553	9591002	chr5	1824744	1826192
			chr6	93113411	93115738	chr7	131928227	131929552	chr6	34547388	34549637	chr6	20326352	20328202
			chr6	96156457	96157105	chr7	132637074	132639264	chr6	125184993	125186055	chr1	112098672	112100147
			chr6	97000996	97001965	chr7	132919150	132920172	chr6	139321333	139325755	chr10	42292452	42294374
			chr6	151252275	151253235	chr8	465962	467528	chr6	144624254	144625350	chr10	44326768	44328336
			chr6	152341836	152342827	chr8	2375784	2379342	chr7	124822867	124823829	chr2	18400911	18402751
			chr6	154256814	154259232	chr8	14285526	14286596	chr8	480424	481854	chr2	46068030	46071094
			chr7	2517250	2518042	chr8	18095543	18096045	chr8	517257	518565	chr2	147055800	147057117
			chr7	2828109	2831567	chr8	19616843	19618515	chr8	1397955	1398783	chr3	8705572	8707053
			chr7	2944029	2944529	chr8	46530838	46531871	chr8	3310220	3312087	chr3	107134649	107135782
			chr7	4815134	4817027	chr8	135063365	135064314	chr8	11285784	11287506	chr7	128966015	128968383
			chr7	106448264	106455100	chr8	141524596	141526266	chr8	79587493	79589045	chr8	2873079	2873715
			chr7	130000816	130003361	chr8	141861763	141863431	chr8	141491143	141493431	chr8	52229570	52230993
			chr7	131613323	131614868	chr8	144157983	144158937	chr8	147047477	147048287	chr8	77302286	77303995
			chr7	131667834	131671064	chr8	144901213	144902442	chr9	2328759	2330476	chr8	131919950	131921032
			chr7	132837605	132841418	chr8	145065486	145066102	chr9	20434595	20437795	chr9	5191328	5192172
			chr7	132928434	132929518	chr8	146601541	146602141	chr9	68098037	68099217	chr1	54468811	54470167
			chr7	133185805	133186237	chr9	2726202	2727161	chr9	74483486	74484588	chr2	78342234	78344875
			chr8	1776749	1778409	chr9	4733877	4735268	chr4	450420	451249	chr2	143168870	143171418
			chr8	3260683	3261976	chr9	5328444	5332321	chr4	52845773	52847436	chr2	154066514	154067505
			chr8	3285915	3287732	chr9	5743020	5744079	chr4	150693002	150693965	chr3	12123526	12126053
			chr8	3295378	3296264	chr9	5764052	5766283	chr7	111144807	111146431	chr3	115565508	115567886
			chr8	3380364	3381606	chr9	6036371	6038277	chr8	1512327	1512914	chr4	101257021	101257798
			chr8	4601190	4601950	chr9	88079399	88080221	chr8	3324936	3326128	chr4	132134496	132135995
			chr8	11628601	11630588	chr1	6728275	6728963	chr9	2868883	2870524	chr5	9670484	9671477
			chr8	21768943	21770433	chr10	1279646	1280373	chr1	63097774	63102845	chr5	37592383	37594007
			chr8	50979721	50982645	chr10	7278754	7280652	chr1	199306161	199307891	chr5	138956148	138957429
			chr8	58736192	58736866	chr10	45314490	45315010	chr10	532101	532713	chr5	145862259	145863126
			chr8	98823321	98825991	chr10	48041271	48042553	chr10	1144572	1145653	chr6	103792999	103794480
			chr8	103601318	103603811	chr10	49660908	49662711	chr2	11733570	11737707	chr6	111481030	111482812
			chr8	137290594	137291627	chr10	50629791	50630384	chr2	14656031	14657124	chr8	71128906	71130108
			chr8	143708920	143709642	chr2	412726	414379	chr2	83644895	83646311	chr8	101337323	101339211
			chr8	144911840	144915933	chr2	1559954	1560966	chr2	159084858	159086892	chr9	25368500	25369343
			chr8	145867010	145868871	chr2	3374646	3377020	chr3	62655745	62657147	chr9	73792068	73793861
			chr8	146276533	146276965	chr2	53710220	53711589	chr3	93934054	93935936	chr1	110769236	110771450
			chr9	1837523	1838377	chr2	102721898	102722321	chr3	129585257	129585971	chr1	128548034	128549369
			chr9	1868629	1869097	chr2	169075395	169076482	chr3	135401788	135405611	chr1	139139341	139140660
			chr9	5213891	5219003	chr2	174973027	174975365	chr3	138212109	138213045	chr2	12968172	12969155
			chr9	6007295	6008269	chr3	1037171	1037970	chr4	4285318	4286251	chr2	112271318	112273262
			chr9	7975336	7976948	chr3	31077281	31079592	chr4	34613838	34617547	chr2	155092624	155093401
			chr9	55804834	55805157	chr3	90586714	90588023	chr4	129902278	129903167	chr4	105188236	105189912
			chr9	67437802	67441605	chr3	105264400	105265562	chr5	8329016	8329814	chr4	151192166	151193091
			chr9	88987974	88988864	chr3	118215313	118217336	chr5	129414969	129416140	chr5	9589606	9590991
			chr1	6771051	6771826	chr3	135264330	135267391	chr5	163594585	163595215	chr5	44050716	44051717
			chr1	18065730	18067937	chr3	140615887	140625211	chr6	31592432	31593599	chr5	52651916	52653561
			chr1	65566011	65568111	chr3	143418094	143419649	chr6	90306506	90307379	chr5	143718633	143719738
			chr1	146143852	146146456	chr3	152610073	152611592	chr7	2926487	2929550	chr5	162081399	162082653
			chr1	161007332	161010242	chr4	480304	481050	chr7	131880394	131881540	chr6	6467609	6468804
			chr1	215146554	215147109	chr4	90578342	90580103	chr8	13241295	13243180	chr6	28740887	28742189
			chr1	216280457	216281188	chr4	136186738	136189563	chr8	77118824	77120465	chr6	50333018	50336664
			chr1	217071287	217071990	chr4	150843118	150844096	chr8	87092622	87094166	chr6	106303469	106305636
			chr10	801956	802538	chr5	59520677	59522010	chr8	104790632	104791919	chr7	103961602	103963088
			chr10	2444350	2445896	chr5	129561910	129563412	chr8	105177217	105179342	chr9	7978240	7980413
			chr10	41109585	41111465	chr6	5707992	5708374	chr8	143551654	143552370	chr2	3501162	3502109
			chr10	46648967	46650263	chr6	26840910	26843264	chr8	144253146	144254892	chr1	114536173	114537167
			chr10	50582654	50584834	chr6	34547402	34549525	chr9	89504117	89504791	chr3	3023094	3024091
			chr10	50883221	50883965	chr6	96097453	96099231	chr1	27730382	27731477	chr3	58775497	58778278
			chr10	51303760	51305614	chr6	97516477	97517888	chr3	114970381	114973131	chr4	90476355	90477400
			chr10	51585169	51585863	chr6	111726275	111728555	chr4	122118336	122119536	chr4	113939287	113941388
			chr10	51594156	51594483	chr6	126272898	126274549	chr4	126023981	126025038	chr4	128219158	128220223
			chr10	51892470	51893371	chr6	130789432	130790550	chr5	151068236	151069306	chr6	1731612	1732767
			chr2	310962	312619	chr6	151285828	151288028	chr7	117380668	117382201	chr7	20387474	20388773
			chr2	408098	409467	chr7	15778014	15778891	chr9	21698797	21699834	chr8	109905664	109907480
			chr2	1132189	1134309	chr7	111020847	111023434	chr1	6726354	6727244	chr9	4560062	4560714
			chr2	1593857	1594520	chr7	131536024	131537896	chr1	112431784	112433076	chr9	66500481	66501538
			chr2	1812907	1816089	chr8	6553316	6554487	chr1	142747877	142749095	chr1	61008888	61011137
			chr2	12538871	12542788	chr8	44284480	44285431	chr1	154011202	154013416	chr1	67671044	67672494
			chr2	102967978	102971094	chr8	59417479	59419085	chr1	191493165	191494447	chr1	105580696	105581899
			chr2	179095785	179098795	chr8	78046841	78048390	chr1	195030198	195032375	chr1	129360914	129362089
			chr3	2236118	2236644	chr8	106339601	106343470	chr1	202597124	202598368	chr1	182323374	182325147
			chr3	7492977	7494474	chr8	113907427	113909184	chr2	164547957	164549215	chr2	14043092	14044932
			chr3	115084268	115084780	chr8	146576372	146578706	chr3	107134593	107135812	chr2	31895145	31896640
			chr3	132782055	132783444	chr9	5966441	5968181	chr3	144631287	144632887	chr2	152760670	152762077
			chr3	135398125	135398657	chr9	82080744	82083581	chr4	2317798	2319562	chr3	107316627	107317409
			chr3	135557961	135558277	chr9	88210932	88212759	chr4	6906517	6907442	chr4	18950714	18952142
			chr3	140626344	140629771	chr9	89441174	89442190	chr4	24933165	24934957	chr4	115592693	115594094
			chr3	144644843	144650483	chr1	19581059	19582392	chr4	34324761	34327977	chr5	38948731	38950827
			chr3	144705663	144707192	chr1	44844637	44845645	chr4	136552720	136553686	chr5	147162357	147163456
			chr3	144708499	144710037	chr1	56563287	56564935	chr5	2434474	2436817	chr6	56607386	56608800
			chr3	146901088	146903686	chr1	56768396	56771159	chr5	8923608	8924963	chr7	37172254	37173386
			chr3	151952522	151952976	chr1	84860737	84862809	chr5	163995243	163995874	chr8	133345780	133346865
			chr4	2207835	2209656	chr1	106489278	106491072	chr6	6609725	6611241	chr1	101441220	101442962
			chr4	33276542	33279943	chr1	117272559	117273905	chr6	108118965	108120184	chr1	145341417	145343152
			chr4	33290198	33290848	chr1	147647086	147649054	chr6	152268351	152268989	chr3	15788109	15788939
			chr4	96321826	96323618	chr1	152829392	152831315	chr6	153969003	153970502	chr3	67947904	67949375
			chr4	151711829	151712817	chr1	162023757	162026291	chr7	9647121	9648495	chr3	140099628	140100602
			chr4	153431299	153432269	chr1	191454005	191455957	chr7	117570322	117571005	chr3	153365161	153366079
			chr5	853539	853940	chr1	200967318	200969951	chr7	120094353	120096486	chr4	83765085	83766069
			chr5	1374091	1374601	chr10	17296433	17301849	chr8	1408234	1408840	chr4	89470097	89471878
			chr5	70408945	70409982	chr10	24785129	24785527	chr8	97467379	97468902	chr5	145652031	145652720
			chr5	92725752	92726205	chr10	28072329	28073634	chr8	114128680	114129782	chr5	152796964	152799415
			chr6	541970	542989	chr10	29199393	29200118	chr8	138214229	138216164	chr8	96545538	96547982
			chr6	826161	826524	chr10	42668243	42672336	chr9	5243888	5251172	chr8	105177212	105179068
			chr6	1722398	1723078	chr10	49803619	49804690	chr9	81968052	81970194	chr9	65695682	65698460
			chr6	2833092	2833502	chr10	52416338	52416974	chr2	18317686	18320505	chr1	21042659	21044295
			chr6	4353433	4354041	chr2	1570311	1572161	chr2	73812654	73813766	chr1	27927767	27929387
			chr6	5746567	5747179	chr2	2114414	2115895	chr2	172012392	172013844	chr1	190900328	190902348
			chr6	5799502	5800256	chr2	90366219	90367435	chr4	123921715	123925970	chr2	103196363	103198589
			chr6	6706496	6707045	chr2	118478364	118480520	chr4	136971467	136974497	chr3	13559897	13561409
			chr6	96102917	96103791	chr2	122101418	122104025	chr5	122439378	122440856	chr3	83635222	83636495
			chr6	96991912	96995008	chr2	133634720	133637076	chr5	131575472	131576543	chr3	109252190	109254461
			chr6	140575117	140576505	chr2	141912274	141913649	chr6	26363476	26365744	chr3	153382760	153383843
			chr6	150529316	150530655	chr2	147343733	147347027	chr1	17072531	17073645	chr4	133369059	133370497
			chr6	153314356	153315441	chr2	179014436	179017407	chr1	56571145	56573757	chr5	1987588	1988681
			chr6	154309200	154312538	chr2	180996060	180996729	chr1	65989614	65990899	chr5	108882776	108884105
			chr7	944890	945847	chr3	4740470	4741172	chr1	74850016	74851182	chr6	130657241	130658747
			chr7	3674232	3674592	chr3	7447560	7448593	chr1	131922218	131923063	chr7	52925135	52926416
			chr7	91650615	91651557	chr3	8813985	8815316	chr1	154392570	154394618	chr8	97607538	97609610
			chr7	131505645	131506660	chr3	9454816	9455825	chr1	201470010	201471565	chr9	18754650	18756496
			chr7	132747671	132748645	chr3	11769824	11770793	chr10	34568078	34568848	chr9	24471580	24473560
			chr7	133210199	133211198	chr3	36603986	36606185	chr10	51372275	51373314	chr1	178961359	178962840
			chr8	468088	469096	chr3	46243562	46246445	chr10	51551195	51552379	chr1	201925098	201926688
			chr8	1354716	1355289	chr3	64762838	64766716	chr10	52424011	52424753	chr10	49141791	49142571
			chr8	1753793	1754956	chr3	72514598	72516632	chr2	1270807	1272406	chr2	14941329	14942336
			chr8	1917696	1919192	chr3	112550581	112552393	chr2	14782728	14783581	chr3	76991075	76992693
			chr8	3274034	3274975	chr3	118294939	118296735	chr2	173350825	173351921	chr3	125207437	125208606
			chr8	13982821	13983230	chr3	122407495	122409009	chr3	41754418	41755589	chr3	134709633	134710868
			chr8	15466826	15467257	chr3	125054708	125056939	chr3	134709553	134710791	chr5	2419483	2420272
			chr8	43379797	43382632	chr3	130614933	130616553	chr3	144600853	144601801	chr6	151223546	151224338
			chr8	44726699	44729448	chr3	135665910	135666257	chr3	151066263	151073486	chr7	90518575	90519547
			chr8	55021044	55023320	chr3	138883810	138885430	chr3	152111442	152114614	chr7	102898830	102900379
			chr8	58737268	58738092	chr3	140472185	140477570	chr3	153293274	153294870	chr7	104026658	104027863
			chr8	95775151	95776257	chr3	147621125	147624294	chr4	104176137	104178428	chr8	40817453	40818536
			chr8	103323144	103325006	chr3	152550022	152550931	chr4	141847987	141850003	chr8	133202686	133204338
			chr8	141774232	141775447	chr4	106556832	106558573	chr5	79587928	79588987	chr8	138214143	138215486
			chr8	145180639	145181778	chr4	113637762	113639578	chr5	124755692	124757404	chr9	21011092	21012809
			chr8	145228360	145229107	chr4	141976720	141977569	chr6	33532506	33533934	chr4	66709316	66710538
			chr8	146793567	146794996	chr4	148022505	148025493	chr6	103061871	103063857	chr1	87620137	87622897
			chr9	233160	233661	chr4	153468747	153471746	chr7	9975612	9978201	chr10	46667392	46668280
			chr9	2068826	2069593	chr5	652651	653674	chr7	132653150	132654637	chr2	89391810	89394153
			chr9	4526593	4527599	chr5	873101	873667	chr8	6610846	6614318	chr2	110498301	110500417
			chr9	4732214	4732582	chr5	2800532	2802778	chr8	102415098	102417080	chr2	138475269	138476638
			chr9	5341174	5342776	chr5	5981585	5982852	chr9	4733779	4735311	chr3	94447661	94448992
			chr9	73884349	73886185	chr5	8226267	8229782	chr9	14476274	14479014	chr6	37867660	37869215
			chr9	86348933	86349847	chr5	13506357	13506838	chr9	21579672	21584397	chr4	103835335	103838853
			chr9	89492312	89493440	chr5	31982303	31984940	chr9	89395778	89396930	chr1	20843326	20844574
			chr9	91135606	91135921	chr5	33542786	33545702	chr9	89504935	89505901	chr1	144359851	144361626
			chr1	12204427	12205036	chr5	35579740	35580678	chr4	151192166	151193051	chr3	108127693	108128767
			chr1	24189137	24190093	chr5	45220844	45222052	chr5	125004771	125005676	chr4	65783528	65784605
			chr1	33421827	33422343	chr5	100827798	100835394	chr8	119944386	119945048	chr4	95923263	95925367
			chr1	42675345	42677656	chr5	129415088	129415969	chr1	14556123	14557190	chr4	123972152	123973873
			chr1	152461316	152464215	chr5	136120913	136122060	chr1	114839440	114843725	chr6	89093787	89095718
			chr1	161076707	161077917	chr5	138457219	138459575	chr1	126757619	126759995	chr6	91856004	91857209
			chr1	169386865	169388106	chr5	153781230	153781726	chr1	173861695	173864689	chr7	77804057	77805928
			chr1	189327518	189328393	chr5	154480427	154481042	chr10	1193666	1197560	chr8	23974383	23975596
			chr10	2239718	2244721	chr5	161693117	161696525	chr10	52417657	52418257	chr8	25367252	25369367
			chr10	2735731	2736519	chr5	162319769	162321393	chr2	73463338	73465783	chr8	34898223	34899483
			chr10	50666879	50667980	chr6	87666	89085	chr2	141826907	141828234	chr9	2056658	2057420
			chr10	51940237	51941441	chr6	435884	436454	chr2	174014002	174015433	chr1	48761871	48763166
			chr2	186859	187318	chr6	5734655	5735191	chr2	174998335	174999124	chr1	114537206	114539056
			chr2	279028	279569	chr6	5735482	5737059	chr3	49890668	49893622	chr1	151693963	151696463
			chr2	1135211	1136726	chr6	5834171	5835314	chr3	126319586	126322943	chr1	186127224	186128607
			chr2	1617243	1617805	chr6	6394264	6395674	chr3	144967387	144968321	chr2	48733046	48733868
			chr2	1629224	1629666	chr6	6724862	6727356	chr4	6506839	6508693	chr2	83531594	83533497
			chr2	3130033	3130640	chr6	6888756	6894850	chr4	86827436	86828892	chr2	83934234	83935464
			chr2	3505883	3507714	chr6	12340119	12341704	chr4	126719280	126719891	chr3	8813987	8815348
			chr2	12566993	12568557	chr6	12873411	12883961	chr4	132134268	132135987	chr3	50386576	50387406
			chr2	67467659	67467957	chr6	13331463	13335718	chr4	140766975	140767777	chr3	81829131	81830268
			chr2	117020138	117021625	chr6	40900110	40901948	chr5	13219088	13222261	chr3	126929968	126931229
			chr2	138783166	138786923	chr6	85608141	85610020	chr5	14671737	14673893	chr4	118539572	118541112
			chr2	173375492	173377157	chr6	97033294	97034356	chr5	52379822	52380708	chr4	122485695	122488520
			chr2	174958218	174961632	chr6	103723000	103724089	chr6	17658709	17660494	chr5	91799269	91808345
			chr2	179010346	179012300	chr6	106899852	106900986	chr6	68198885	68201271	chr5	138365736	138367259
			chr2	180199000	180200297	chr6	119622534	119624720	chr6	142027858	142028733	chr6	108583283	108585067
			chr2	180672384	180674803	chr6	140412319	140413205	chr7	6357443	6358597	chr6	120052032	120053847
			chr2	180863186	180863698	chr6	153234013	153235266	chr7	65759057	65760014	chr7	32120991	32122166
			chr3	2035078	2036296	chr6	153923446	153924626	chr7	99634973	99637208	chr7	81269220	81270937
			chr3	2217439	2217968	chr6	153940187	153940617	chr8	4191456	4193821	chr8	122916	123833
			chr3	2627069	2628451	chr6	154249043	154250646	chr8	112946297	112948982	chr8	1595907	1597151
			chr3	126872473	126873098	chr7	1053765	1056838	chr9	22677616	22678687	chr8	70255652	70257965
			chr3	135246491	135252118	chr7	2960460	2961565	chr9	66419328	66420338	chr9	5306234	5307562
			chr3	135259632	135260847	chr7	3546694	3547370	chr1	20375803	20376830	chr9	71891882	71893462
			chr3	135651800	135652134	chr7	37391353	37393405	chr1	136219513	136220751	chr10	4558025	4558619
			chr3	143418172	143419662	chr7	38787871	38789784	chr1	204204123	204205116	chr1	97934053	97935835
			chr3	144732602	144733750	chr7	59036812	59039912	chr10	46977770	46979965	chr1	145288849	145289723
			chr3	146365081	146367256	chr7	104153317	104156246	chr3	39744663	39746047	chr1	189480896	189483811
			chr3	147317422	147320276	chr7	110858506	110859339	chr3	59010375	59012760	chr2	80577000	80579405
			chr3	151074677	151077307	chr7	117346421	117348687	chr3	117141289	117145244	chr2	104823045	104824187
			chr3	152154087	152154731	chr7	117380596	117382127	chr4	91804667	91805591	chr2	121032051	121033210
			chr3	152496958	152497598	chr7	132768558	132769272	chr5	106060127	106062401	chr2	122660853	122661994
			chr4	1112995	1113718	chr8	547221	547928	chr7	107388592	107391740	chr2	173659126	173660788
			chr4	2324961	2325318	chr8	832685	833786	chr7	132181265	132183539	chr3	38553732	38555483
			chr4	10651512	10652599	chr8	1345348	1347021	chr8	3259409	3262082	chr4	101749844	101751377
			chr4	35138978	35139281	chr8	2790513	2791122	chr8	25047384	25048877	chr4	125869954	125871713
			chr4	35139511	35139794	chr8	2846848	2848951	chr1	40362779	40364645	chr5	153037827	153038892
			chr4	44515211	44516670	chr8	11617773	11619264	chr1	110088589	110090354	chr6	91070399	91071553
			chr4	82561833	82562132	chr8	14815265	14815615	chr1	150085989	150087038	chr7	103644152	103645167
			chr4	92463488	92465147	chr8	73955513	73957026	chr1	151612702	151614306	chr7	132791941	132793149
			chr4	97215911	97217237	chr8	77244486	77249968	chr1	161382585	161383896	chr8	138231454	138233063
			chr4	136185820	136186209	chr8	86331106	86334800	chr1	162346667	162348304	chr9	13627283	13628501
			chr4	142004245	142005223	chr8	95775075	95776228	chr1	199175460	199176661	chr1	207315	208480
			chr5	62754	63318	chr8	98823316	98826063	chr10	711155	712192	chr1	17824588	17826496
			chr5	528197	528953	chr8	115584012	115585253	chr10	2279286	2280159	chr1	72569913	72570976
			chr5	1447465	1449705	chr8	141521943	141522766	chr10	2353327	2356139	chr1	179523987	179525895
			chr5	2803802	2804255	chr8	142639288	142640411	chr10	11619727	11623044	chr2	48794597	48796330
			chr5	2990340	2991485	chr8	143084744	143086317	chr10	38062150	38064340	chr4	21898410	21899563
			chr5	8614850	8619093	chr8	143530183	143531697	chr2	15791838	15796408	chr4	114035709	114037173
			chr5	91809697	91811922	chr8	143539854	143540730	chr2	21824662	21826269	chr4	119138128	119139067
			chr5	153772445	153773270	chr8	144101592	144102354	chr2	26843762	26845594	chr5	39027364	39029066
			chr5	161359482	161360201	chr8	144123869	144124821	chr2	55839512	55842833	chr5	123732292	123734279
			chr5	162558164	162558787	chr8	146377705	146378345	chr2	86412126	86414829	chr6	17658901	17660269
			chr5	163976797	163977488	chr9	2059405	2066181	chr2	133971225	133973775	chr7	12800490	12802052
			chr6	1296529	1298672	chr9	2338922	2339500	chr3	87140739	87142346	chr8	13299280	13300045
			chr6	1321969	1324101	chr9	2729034	2730585	chr3	93895386	93896913	chr8	58116393	58118433
			chr6	1357769	1358893	chr9	4230449	4233128	chr3	140346865	140352291	chr1	60759526	60763076
			chr6	2655456	2658023	chr9	89395823	89396879	chr3	141087070	141088733	chr1	112431802	112432949
			chr6	2823705	2825521	chr9	90912974	90913768	chr3	152594543	152598201	chr1	167458504	167459903
			chr6	2923152	2925982	chr1	76937032	76937683	chr4	6954646	6956923	chr1	182276550	182278143
			chr6	3191390	3192373	chr1	148762021	148763556	chr4	51567896	51569287	chr2	138782898	138785934
			chr6	4842918	4843416	chr1	161443662	161445211	chr4	128239787	128241244	chr3	3942526	3943542
			chr6	5314259	5315408	chr1	167821470	167822620	chr5	31851595	31852884	chr4	104615445	104616647
			chr6	5808786	5810122	chr10	532198	532668	chr5	125373619	125376005	chr5	59520721	59522306
			chr6	6724930	6727348	chr10	10178539	10180847	chr5	151883123	151884402	chr5	147007634	147008345
			chr6	7089432	7093246	chr2	21824657	21826290	chr5	162004044	162005024	chr6	30842137	30843291
			chr6	54359393	54359927	chr2	125264687	125266149	chr6	4397130	4397994	chr8	90869776	90870600
			chr6	86658773	86661838	chr2	138726064	138728033	chr6	14503631	14504380	chr8	142651136	142652804
			chr6	115425018	115427886	chr3	84996647	84997872	chr7	2960416	2961597	chr9	18517413	18518948
			chr6	151273838	151276412	chr3	145227334	145230829	chr7	26897215	26898989	chr1	21026205	21027817
			chr6	151362593	151364722	chr3	152165822	152166831	chr7	29308576	29310110	chr1	39178555	39180872
			chr6	152680973	152682551	chr4	2395638	2397093	chr7	91811274	91813859	chr1	64098672	64100314
			chr6	153125610	153129369	chr4	4196417	4197196	chr7	94902472	94904533	chr1	135138305	135141274
			chr6	153185110	153186091	chr4	90667814	90669650	chr7	111024725	111029333	chr1	153871400	153873638
			chr6	153215230	153216544	chr4	113375601	113376403	chr7	119971121	119972765	chr2	103504332	103507752
			chr6	153217647	153220851	chr5	132671385	132672290	chr8	1173223	1174528	chr2	168804958	168806022
			chr7	960436	961036	chr5	151883193	151884378	chr8	82975451	82976230	chr3	7447547	7448664
			chr7	2948356	2950655	chr5	162974623	162975409	chr8	103850699	103853073	chr3	9389402	9390278
			chr7	5592269	5592812	chr5	163594669	163595052	chr8	145072144	145073171	chr3	115508600	115511026
			chr7	106543088	106543680	chr6	4317687	4318238	chr9	2841217	2842405	chr3	125692743	125694001
			chr7	111020890	111023447	chr6	5146592	5147985	chr9	4342847	4344034	chr3	141128623	141129630
			chr7	131549893	131550653	chr6	19259413	19261037	chr9	4988926	4989851	chr4	96171778	96173205
			chr7	131892059	131893485	chr6	27176533	27178111	chr9	55369249	55370793	chr7	28986049	28987669
			chr7	132803416	132804435	chr7	4218401	4219618	chr2	11819571	11820911	chr7	91908357	91911778
			chr7	132809324	132809888	chr7	27953412	27954603	chr5	38788059	38789455	chr9	22558659	22560351
			chr7	133039594	133041153	chr7	91908345	91911606	chr6	85608144	85610032	chr9	82146712	82147433
			chr8	200801	201344	chr7	119971218	119972853	chr6	106430966	106432978	chr1	157776624	157778866
			chr8	2385506	2387390	chr7	131893687	131894990	chr7	4815090	4817106	chr10	11701693	11703040
			chr8	2601329	2602259	chr8	1337812	1338417	chr7	18967315	18968737	chr10	41690869	41691813
			chr8	2646457	2647015	chr8	3045119	3046103	chr8	118594148	118595447	chr10	44926858	44927761
			chr8	3271395	3273609	chr8	3324988	3326140	Sca98	0	2530	chr2	83582028	83584277
			chr8	5465345	5467882	chr8	21768924	21770433	chr1	145341467	145343111	chr2	146685874	146687667
			chr8	6395915	6397528	chr8	55021110	55023396	chr1	153712840	153714884	chr3	126872333	126873193
			chr8	13781251	13781481	chr8	76800483	76801386	chr1	171337554	171342670	chr4	38456526	38458554
			chr8	14600732	14601354	chr9	2345949	2346776	chr1	177018071	177021247	chr5	161904425	161905061
			chr8	64818311	64818624	chr9	29207601	29210318	chr1	191890170	191891210	chr5	162458308	162459998
			chr8	103850696	103853020	chr9	32586820	32587861	chr10	28375365	28376721	chr8	104369	105543
			chr8	114731025	114732544	Sca36	13494	14466	chr10	39446416	39447218	chr9	29664248	29666136
			chr8	118203806	118204406	chr1	74849216	74851239	chr10	52352061	52353281	chr9	83991851	83992981
			chr8	133268375	133269663	chr1	134005548	134006479	chr2	703494	704122	chr1	210932125	210933166
			chr8	141560475	141561602	chr1	153811904	153812760	chr2	7402450	7407598	chr10	45314420	45315021
			chr8	143084736	143086298	chr1	186127194	186128561	chr2	137547248	137547950	chr3	77483742	77485042
			chr8	144115827	144118016	chr1	186197707	186199765	chr2	156785747	156786429	chr3	86409466	86411004
			chr8	145088503	145092134	chr1	205384780	205386437	chr2	156901736	156902843	chr3	118215343	118217250
			chr9	4800137	4801331	chr1	211232033	211232719	chr3	125225169	125226654	chr3	151245225	151246443
			chr9	7219164	7219610	chr1	215146530	215147095	chr4	480235	481171	chr4	108718803	108720217
			chr9	12619748	12622117	chr10	736803	738414	chr4	2299274	2300992	chr5	32765170	32767236
			chr9	28349378	28350358	chr10	2539233	2541516	chr4	33691933	33694915	chr5	92545478	92547594
			chr9	78712254	78712830	chr10	18522452	18530634	chr4	77669629	77672190	chr6	5247302	5248726
			chr9	89846566	89848099	chr10	44810391	44811375	chr5	2230271	2238780	chr6	13883137	13885559
			chr9	89922377	89926066	chr10	51372292	51373256	chr5	162504766	162506145	chr6	27181474	27183444
			chr9	90285228	90286664	chr2	117299	119277	chr6	4474876	4475618	chr6	46327336	46329198
			chr1	6768743	6770477	chr2	1497588	1499107	chr6	4842805	4843483	chr6	104908459	104909602
			chr1	6918655	6920370	chr2	3104621	3105088	chr6	5836463	5838108	chr7	95725704	95729333
			chr1	16902802	16906033	chr2	7408022	7410195	chr6	151365195	151368719	chr8	1917620	1919258
			chr1	21717650	21718867	chr2	15651000	15651810	chr7	2883511	2886362	chr8	43623830	43625757
			chr1	22053868	22055740	chr2	86568893	86569877	chr8	832636	833831	chr8	113907231	113909097
			chr1	44729273	44730630	chr2	90896368	90897861	chr8	3281879	3284005	chr9	4278913	4280084
			chr1	49896796	49899368	chr2	146199855	146201558	chr8	4232164	4233404	chr9	24978432	24979788
			chr1	160082173	160083337	chr2	148818017	148819515	chr8	137356229	137357072	chr9	77289361	77290485
			chr1	182033049	182035287	chr2	152382315	152385989	chr8	141979126	141979814	chr1	138975679	138980828
			chr1	191401462	191401835	chr2	173375467	173377167	chr9	2437338	2440366	chr1	199306121	199308062
			chr1	212849267	212850042	chr2	179095772	179098847	chr9	2553707	2557427	chr10	28472754	28474593
			chr10	1712174	1712664	chr3	1222753	1227259	chr9	2694697	2696114	chr10	43872045	43874885
			chr10	24774452	24774964	chr3	4732338	4733158	chr9	7977466	7978082	chr2	73463515	73465840
			chr10	36610085	36612091	chr3	5100904	5102298	chr9	77167030	77168659	chr2	94296382	94299301
			chr10	44561522	44562397	chr3	9822295	9823530	chr9	84080458	84082480	chr2	121520281	121522827
			chr10	46255963	46257521	chr3	10265530	10266663	Sca85	3477	4235	chr3	58015872	58017585
			chr10	50569841	50570579	chr3	56193126	56194348	chr1	17901917	17902791	chr3	107412463	107414605
			chr10	51309627	51310482	chr3	63200948	63202143	chr2	92936576	92937799	chr3	117365314	117366828
			chr10	51515356	51516950	chr3	88919482	88921787	chr3	1361877	1363891	chr4	136325517	136327299
			chr10	51580060	51580477	chr3	99217677	99221001	chr5	129009203	129010523	chr6	21482379	21486251
			chr2	152900	155184	chr3	121146617	121148940	chr6	662128	663241	chr6	152268345	152268992
			chr2	280266	282182	chr3	125604613	125606912	chr7	93715915	93719609	chr7	36328537	36330540
			chr2	357566	358002	chr3	127989049	127990380	chr8	103380275	103382296	chr7	38920467	38921515
			chr2	703505	703968	chr3	129585308	129585849	chr8	138428132	138429756	chr7	91988456	91989352
			chr2	717893	723928	chr3	134615235	134617838	chr8	145442602	145443350	chr7	115965212	115968302
			chr2	2114486	2115657	chr3	135227271	135228271	chr9	2729497	2730611	chr8	22412333	22413268
			chr2	23121220	23123724	chr3	135659482	135660611	chr1	22857708	22861560	chr8	45886790	45888213
			chr2	31302086	31302601	chr3	139295226	139296349	chr1	189327437	189328457	chr8	121288292	121289555
			chr2	41327057	41328901	chr4	2299338	2300911	chr10	2874858	2875952	chr9	49785232	49787045
			chr2	46068103	46071422	chr4	2378239	2379292	chr10	49660717	49662751	chr1	73537715	73538828
			chr2	171760530	171761456	chr4	4027069	4028417	chr2	416667	418370	chr1	120273005	120274345
			chr2	177476180	177476513	chr4	4670480	4671338	chr3	52525790	52526513	chr1	181647425	181648856
			chr2	178118841	178119619	chr4	5368911	5369262	chr3	108436318	108439915	chr2	72930967	72932386
			chr2	178914947	178915930	chr4	19820072	19820735	chr3	137646612	137649192	chr2	157964144	157964977
			chr2	180647256	180648222	chr4	33762099	33765438	chr3	152506760	152508129	chr2	174882674	174883997
			chr3	3877060	3877823	chr4	59330951	59332327	chr4	33512431	33514885	chr3	41754431	41755602
			chr3	4365206	4366616	chr4	59830218	59832251	chr4	36919020	36919814	chr3	74641088	74642189
			chr3	108436935	108439796	chr4	65423406	65424869	chr4	106556710	106558616	chr4	36091212	36092447
			chr3	121183059	121185508	chr4	82714809	82716151	chr4	120430368	120431622	chr6	42471260	42472043
			chr3	136782552	136784193	chr4	129951983	129953379	chr4	128783614	128786597	chr8	46093770	46095439
			chr3	140465888	140467387	chr4	133368898	133370850	chr4	138609660	138610915	chr9	7130908	7134378
			chr3	141268975	141271350	chr4	151253459	151254956	chr4	141976698	141977644	chr1	21747035	21749828
			chr4	413880	415283	chr5	311711	313073	chr5	139905609	139906673	chr1	108811447	108812411
			chr4	152394388	152395869	chr5	2778408	2779319	chr6	6611360	6613543	chr1	127448343	127450433
			chr4	153633220	153634812	chr5	8131163	8132254	chr6	31765190	31766286	chr1	153712964	153714839
			chr5	333479	334547	chr5	8388834	8390425	chr6	91773368	91774883	chr2	13423358	13424385
			chr5	428470	429344	chr5	21073802	21075968	chr6	120157060	120157963	chr2	75064980	75066812
			chr5	1911695	1912719	chr5	23588197	23589346	chr6	139697759	139699914	chr2	136552588	136553776
			chr5	27654212	27656259	chr5	27874333	27875817	chr7	127341402	127343478	chr2	149392283	149394263
			chr5	62806140	62812115	chr5	77152305	77152989	chr7	132311722	132312972	chr2	152382245	152386116
			chr5	145509614	145510687	chr5	111955518	111957379	chr7	132947590	132950206	chr3	125054810	125056484
			chr5	152480615	152481712	chr5	125373741	125375908	chr8	645845	648540	chr3	144556471	144557501
			chr5	162472378	162473044	chr5	129854024	129855189	chr8	1411193	1411889	chr4	73076188	73078063
			chr6	2912778	2914243	chr5	137436913	137438954	chr8	14902816	14903454	chr4	95646072	95646889
			chr6	2931701	2932758	chr5	139905668	139906517	chr8	18129967	18132203	chr5	23588163	23589691
			chr6	4356525	4360685	chr5	143336549	143338068	chr8	51238297	51241011	chr5	50776820	50777904
			chr6	12536149	12537340	chr5	163199968	163200950	chr8	118525815	118526861	chr5	139905127	139906675
			chr6	13366313	13368719	chr5	163844772	163845930	chr8	131920049	131921077	chr6	133761713	133762680
			chr6	89069223	89071040	chr6	4455792	4456518	chr8	143706272	143708061	chr9	38422979	38423897
			chr6	153130914	153131452	chr6	5716518	5717615	chr9	2676130	2677480	chr10	11659402	11662036
			chr7	2866062	2867485	chr6	5740664	5742433	chr9	5476880	5479063	chr2	127152	127788
			chr7	91565555	91566421	chr6	8245929	8246882	chr2	114858784	114861867	chr2	122155407	122156514
			chr7	131792862	131796162	chr6	13883248	13885505	chr3	144906021	144906965	chr2	132394867	132395975
			chr7	132765594	132766082	chr6	27202514	27203705	chr4	91179186	91182072	chr2	168789145	168789975
			chr7	132883885	132885159	chr6	127774828	127775928	chr9	5616037	5617754	chr3	3113446	3114718
			chr7	132951791	132954154	chr6	151291870	151292908	chr1	16915204	16916855	chr3	61279992	61281530
			chr8	480504	481741	chr6	152421098	152423241	chr1	20346653	20348730	chr3	127330045	127330778
			chr8	503872	504556	chr6	153936076	153937388	chr1	139743461	139745819	chr4	18649600	18650708
			chr8	1321034	1326433	chr7	960439	961084	chr10	2444327	2445992	chr4	84716239	84718531
			chr8	3326505	3328396	chr7	6250683	6253001	chr10	8754258	8758147	chr4	100982398	100983787
			chr8	3512928	3514650	chr7	31824417	31826710	chr10	10670291	10671471	chr5	138903109	138905722
			chr8	21163317	21163629	chr7	38920550	38921663	chr2	16691860	16693486	chr6	7478361	7479364
			chr8	94979076	94983158	chr7	79920189	79922230	chr2	47817192	47818712	chr7	128858812	128860238
			chr8	113847980	113849755	chr7	88684392	88685372	chr2	80603784	80605706	chr8	100275663	100277251
			chr8	119238956	119241713	chr7	99615221	99617078	chr2	90366376	90367434	chr8	115517412	115518447
			chr8	127731481	127732277	chr7	106144223	106145956	chr2	165916869	165918339	chr9	12700829	12702406
			chr8	142919576	142920370	chr7	106460305	106460648	chr3	3755816	3756784	chr1	40690971	40692055
			chr8	145078660	145079421	chr7	130079873	130082294	chr3	108150123	108153037	chr1	109985540	109986669
			chr8	146377700	146378333	chr7	131731566	131732353	chr3	131861549	131863108	chr1	181027964	181033116
			chr9	347033	348167	chr7	131916016	131917699	chr3	138174624	138175620	chr10	37759354	37760755
			chr9	2915589	2917209	chr8	526659	527109	chr3	152165780	152166964	chr10	41109157	41111535
			chr9	5029604	5031112	chr8	2327635	2328775	chr4	93763230	93764696	chr10	51426672	51429063
			chr9	6038983	6039958	chr8	2834257	2835840	chr5	2662211	2662958	chr3	65506969	65508011
			chr9	25141549	25142344	chr8	10528299	10529141	chr5	14258524	14259402	chr3	130782171	130783515
			chr9	89457877	89460268	chr8	75974696	75975388	chr5	14748001	14749890	chr4	64793797	64794828
			Sca85	1891	3062	chr8	97279006	97280897	chr5	18308602	18309581	chr4	126048032	126049795
			chr1	678389	679695	chr8	104540760	104543301	chr5	38864904	38866426	chr5	74128938	74130365
			chr1	6845309	6849124	chr8	105177270	105179353	chr5	39027364	39028958	chr5	119831143	119832157
			chr1	6858789	6859861	chr8	127679589	127681168	chr5	52928395	52929926	chr8	6616761	6619280
			chr1	15869348	15873513	chr8	141774229	141775436	chr5	152448214	152450413	chr8	56990054	56991691
			chr1	165351326	165354539	chr8	143244808	143246064	chr5	153037840	153038853	chr9	45213589	45214960
			chr1	183966731	183968366	chr8	145417637	145418084	chr6	4408466	4409699	chr1	99112018	99113273
			chr1	204776023	204776891	chr8	145861634	145863954	chr6	44331250	44333617	chr1	200751949	200753298
			chr1	205897868	205898842	chr8	146813735	146814554	chr7	38663107	38664776	chr10	38588757	38590308
			chr1	216241259	216241601	chr9	2437369	2438173	chr7	44101698	44102746	chr2	3138611	3139951
			chr10	1279622	1280365	chr9	5191300	5192164	chr7	80821481	80827546	chr2	120778282	120781950
			chr10	3085879	3088132	chr9	5744556	5747037	chr7	96117172	96118402	chr3	65547509	65548641
			chr10	10890359	10891929	chr9	6009668	6010909	chr7	117299546	117300691	chr3	72476092	72477928
			chr10	13578083	13579164	chr9	21698886	21699700	chr8	12157951	12159620	chr3	117141254	117145150
			chr10	36493868	36495039	chr9	74473167	74475142	chr8	14350013	14350697	chr4	58786519	58787972
			chr10	46980516	46981088	chr9	78712223	78712789	chr8	15984594	15984959	chr5	1395078	1396037
			chr10	46989787	46994527	chr1	715318	717322	chr8	22255145	22257368	chr5	18308570	18309668
			chr10	50648910	50651486	chr1	12281648	12282579	chr8	83282150	83284385	chr6	41103494	41105181
			chr10	51564205	51566073	chr1	16934516	16939576	chr8	109905708	109907520	chr6	103487049	103488705
			chr10	51916123	51916907	chr1	18308189	18309039	chr8	127209885	127214288	chr7	116710359	116711321
			chr2	318202	319567	chr1	45220489	45222539	chr8	143710967	143712232	chr7	119971118	119972369
			chr2	403080	403542	chr1	116012113	116012986	chr8	144094003	144095789	chr1	170622629	170624607
			chr2	1518751	1519718	chr1	161763478	161764887	chr9	14376371	14378347	chr10	10661288	10662468
			chr2	1541275	1541853	chr1	197935385	197936930	chr9	14728874	14729838	chr10	33007913	33010854
			chr2	3413847	3415003	chr1	201984196	201985862	chr9	67469349	67470453	chr2	45486807	45488699
			chr2	6586393	6587362	chr10	1422626	1423678	chr9	77215254	77216267	chr2	134608282	134610003
			chr2	7417747	7418766	chr10	50960658	50961211	chr9	82248353	82249563	chr3	5088976	5090404
			chr2	26844285	26845500	chr2	1518761	1519781	chr9	83969826	83971016	chr3	101861117	101863061
			chr2	136506092	136507572	chr2	136506104	136507594	chr9	89492243	89493509	chr3	106231487	106232102
			chr2	137818262	137821960	chr2	173876659	173878277	chr9	90924012	90924933	chr4	128824634	128826007
			chr2	158637879	158638981	chr2	178775280	178776482	chr1	97933888	97935742	chr5	32916257	32919800
			chr2	172679986	172680837	chr2	179215893	179216479	chr1	111683498	111684418	chr5	39239996	39241977
			chr2	172681479	172682067	chr3	1207369	1207944	chr5	13537464	13539063	chr6	41069229	41071108
			chr2	180178520	180179748	chr3	2217498	2217968	chr6	4455809	4456590	chr6	69265701	69266497
			chr2	181004656	181005546	chr3	58822219	58824284	chr6	42137309	42138493	chr6	108311664	108312977
			chr3	156831	159836	chr3	127330081	127330708	chr7	96126566	96127377	chr7	118752623	118753385
			chr3	2573786	2576140	chr3	135964698	135965559	chr8	115517409	115518350	chr8	75974597	75975496
			chr3	4742813	4744534	chr3	138212149	138213002	chr8	117334130	117335391	chr1	29618361	29620206
			chr3	5011398	5012339	chr3	140855286	140856806	chr1	29251645	29253268	chr3	9377793	9380489
			chr3	31077386	31079412	chr3	144472774	144474835	chr1	38881061	38882256	chr3	48510732	48511760
			chr3	113989001	113991270	chr4	34408273	34409089	chr1	113397073	113398369	chr3	89796220	89797588
			chr3	125261055	125263450	chr4	35682835	35684018	chr1	176132224	176133444	chr4	128084696	128085630
			chr3	144631451	144632799	chr4	97550654	97551440	chr1	211175356	211177279	chr5	8418858	8419415
			chr3	151299680	151300600	chr4	100273519	100275119	chr10	49809393	49810600	chr5	79590325	79592964
			chr3	151458917	151459367	chr4	119284941	119288853	chr10	51533707	51535524	chr5	85327598	85328945
			chr3	152496348	152496808	chr4	133335465	133336836	chr2	15116250	15117033	chr6	6377844	6378887
			chr3	152506796	152507431	chr4	148975859	148977306	chr2	141273906	141275016	chr7	43804570	43806595
			chr3	153365223	153365989	chr5	37765409	37766954	chr2	173579929	173580549	chr7	63942688	63943390
			chr3	153392694	153393286	chr5	40269727	40271662	chr3	13559939	13561420	chr7	66158257	66160304
			chr3	153536652	153537503	chr5	95271567	95272820	chr3	59032418	59033723	chr7	90021910	90023266
			chr4	2431671	2432484	chr6	23331992	23333227	chr3	109252185	109254421	chr8	547187	547986
			chr4	4670519	4671338	chr6	31592413	31593339	chr3	132043924	132048425	chr8	97467369	97468755
			chr4	36310951	36312955	chr6	46327290	46329123	chr3	142456058	142457714	chr8	131967938	131969488
			chr4	46477706	46478201	chr6	97289632	97291405	chr4	6871606	6872710	chr8	144852667	144853688
			chr4	82723905	82724263	chr6	109125860	109127549	chr4	7017301	7018244	chr1	14556111	14557150
			chr4	107811036	107813799	chr6	152277610	152278016	chr4	33326099	33327085	chr10	10781888	10782620
			chr4	113375601	113376405	chr7	26918934	26920641	chr5	528129	529060	chr10	49780232	49783268
			chr4	151714009	151715304	chr7	109199261	109202284	chr5	2446905	2449758	chr2	41327133	41328958
			chr4	153110233	153111004	chr8	164251	165863	chr5	5981585	5982934	chr2	93992691	93993935
			chr5	339562	342513	chr8	1341361	1342557	chr5	21175008	21176505	chr2	179485750	179486918
			chr5	27553367	27554269	chr8	2871112	2872455	chr5	31394954	31396876	chr3	107607946	107609031
			chr5	27658902	27660789	chr8	16804640	16805839	chr5	85093518	85095285	chr4	36955952	36957854
			chr5	38292581	38294912	chr8	73506698	73508938	chr5	123825707	123827603	chr5	74871896	74873001
			chr5	38788062	38789371	chr8	77025063	77026170	chr6	4302325	4303587	chr6	19292653	19294467
			chr5	76881599	76883782	chr8	100275839	100277201	chr6	34260857	34262633	chr6	90790343	90792224
			chr5	161700680	161702630	chr8	103323158	103325087	chr7	15636199	15637676	chr8	45945095	45946947
			chr5	162447007	162450968	chr8	143524538	143525088	chr7	122446961	122447793	chr8	114788613	114790648
			chr6	3061559	3062375	chr8	144852763	144853461	chr7	130342665	130344382	chr8	137291889	137293481
			chr6	3580738	3581165	chr9	64969523	64971706	chr8	291780	292906	chr9	7988644	7989614
			chr6	3593438	3594468	Sca85	3516	4213	chr8	43623787	43625746	chr9	13849348	13850039
			chr6	4419946	4424396	chr1	20346686	20348036	chr8	99643657	99644997	chr3	68650897	68652770
			chr6	6714668	6717568	chr1	31746328	31748159	chr8	119241976	119246431	chr5	36927098	36927929
			chr6	7045348	7047257	chr1	51363769	51365040	chr9	52150018	52150564	chr1	213951863	213952911
			chr6	68198890	68201254	chr1	56154920	56155917	chr9	68421435	68422457	chr2	134324178	134325077
			chr6	96099417	96099931	chr1	68900589	68901963	chr1	42724397	42725724	chr2	146802074	146803740
			chr6	96101808	96102241	chr1	120366472	120368197	chr1	168852622	168853613	chr3	104695842	104698013
			chr6	99151516	99152341	chr1	136236038	136237379	chr10	50489177	50491292	chr4	90579165	90580103
			chr6	123458348	123460470	chr1	151694381	151695738	chr10	52067349	52068376	chr5	7988530	7989282
			chr6	126272811	126274607	chr1	153875516	153877655	chr2	137439937	137441967	chr6	141292506	141295358
			chr6	151277041	151277766	chr1	178162002	178163609	chr3	31689521	31691542	chr7	110858454	110859368
			chr6	152082090	152083330	chr1	192018861	192019511	chr4	18595727	18599970	chr8	1148641	1149743
[truncated: 45,729 more rows]

## Sheet: Table S2
Table S2: Expression (TPM) of all genes in X.tropicalis early developmental stages
Gene Name	Stage 3		Stage 4		Stage 5		Stage 6		Stage 7		Stage 8		Stage 9		Stage 10		Stage 13
	rep1	rep2	rep1	rep2	rep1	rep2	rep1	rep2	rep1	rep2	rep1	rep2	rep1	rep2	rep1	rep2	rep1	rep2
42Sp43	244.902	248.519	264.58	264.227	269.57	256.652	280.326	265.878	233.091	219.734	335.968	336.885	305.809	290.164	198.019	163.219	20.0911	15.5333
42Sp50	53.7009	53.6662	58.1133	58.1321	63.235	57.8127	62.8476	58.9577	105.003	103.973	50.5864	42.7448	26.6581	28.2574	17.4985	21.271	4.73933	3.43372
a1cf	0	0	0	0	0	0	0	0	0	0	0	0	0	0.0403342	0	0	1.49315	1.60407
a2m	0	0	0	0.0560881	0	0	0	0.0241215	0	0	0.0656908	0	0.0805498	0	0	0	0.856235	1.12255
a2ml1	0.0732026	0.118462	0.158658	0.0585065	0.0832993	0.272662	0.109161	0.150969	0.11092	0.148056	0	0.0267625	0.0280076	0.0444235	0.137047	0.0381776	23.5339	20.0089
a4galt	0	0	0	0	0	0	0	0	0	0	0	0	0	0	0.280043	0	0.52145	0.125933
a4gnt	0	0	0	0	0	0	0	0	0	0	0.0484105	0	1.9589	1.12984	7.6005	6.87781	5.28836	4.87646
aaas	40.2461	34.4737	43.8862	42.8413	55.6721	51.2334	60.302	62.416	70.2187	68.863	83.6635	79.3798	63.8972	68.9451	23.3751	28.5404	28.7424	30.0189
aacs	57.0831	78.2526	58.9147	64.5349	55.677	55.0392	52.463	46.502	34.5486	35.9835	48.5121	51.8555	48.4885	48.8792	9.67745	12.4103	1.60521	1.01294
aadac	0	0	0	0	0	0	0	0	0	0	0	0	0	0	0	0	6.23757	7.8129
aadacl3	0.0915291	0.423199	0.0881682	0	0.416615	0.363653	0	0.167791	0.12328	0.555368	0.228476	0.13385	0.560311	0.333271	0.114239	0.381884	15.8828	21.1653
aadat	6.73998	6.18073	5.19399	6.5241	6.39135	5.46728	7.8173	8.95791	9.83451	8.93651	7.71118	7.55658	6.53283	8.72578	5.25765	4.45249	2.52363	1.63926
aagab	96.5701	81.9481	79.7349	80.0414	56.5802	60.0453	55.8124	51.7222	43.2274	41.208	32.2847	32.5035	35.482	34.1858	38.7419	36.5742	43.6394	41.7265
aak1	5.21911	4.53609	4.67745	4.59374	8.11911	8.25173	9.68752	8.41714	15.8499	16.3572	13.8938	16.2066	12.9669	12.9697	3.15395	5.71952	2.07274	2.55851
aamdc	1.24268	1.72372	0.199509	0.441424	2.12113	2.26292	2.05902	1.89841	10.461	12.9859	1.8095	3.33167	7.92428	6.28444	14.4761	14.2582	17.0073	16.9719
aamp	89.4848	75.3276	90.6064	87.1268	100.547	102.293	104.024	93.2972	99.0577	99.7228	119.176	102.122	105.381	101.872	54.2988	62.4344	48.5774	39.3209
aanat	0	0	0	0	0	0	0	0	0	0	0.12894	0	0.474316	0.877711	1.41835	0.215516	0	0.347901
aar2	1.17338	0.852546	1.69544	1.25041	1.0491	1.74822	1.99973	2.68879	6.54741	5.82003	3.97506	2.20619	5.51554	4.57761	5.33498	6.99378	16.8812	16.8407
aars1	13.3523	11.6664	15.3441	16.3686	23.9904	25.1288	30.2743	25.7963	35.8554	34.8795	46.5701	47.9587	48.0903	50.7702	47.4057	46.1451	28.5164	31.8924
aars2	3.91307	2.8218	3.28524	2.94577	4.73876	5.0278	5.78173	6.05465	9.18707	8.64049	11.6945	8.97734	9.34008	9.58586	4.48069	5.76666	7.17515	5.31941
aarsd1	2.55168	1.53056	2.65728	2.42524	4.63011	3.35651	5.21062	4.10883	8.03475	6.23029	14.977	13.8167	10.7655	9.79326	7.23031	6.04249	1.60275	2.63209
aasdh	0.744894	1.06455	1.76124	2.16491	2.73555	2.25328	3.43339	3.56903	4.85684	4.1317	2.95815	2.82232	3.10909	3.90402	3.29625	3.03726	7.86888	5.5491
aasdhppt	5.38688	6.30128	4.92297	3.77797	3.71985	3.65855	3.89065	2.99633	3.25569	3.32135	2.87324	3.83783	2.25482	2.7382	1.1493	0.480246	0.356674	0.930298
aass	123.559	115.597	110.134	107.419	114.951	114.03	115.39	106.92	82.9176	79.3985	89.548	93.1226	78.075	81.5037	62.8601	67.4025	29.374	33.6694
aatf	37.1457	34.8035	40.1701	37.2692	51.1218	56.7359	61.315	64.5623	46.6801	48.6214	31.9283	30.0304	40.5448	41.0012	58.1712	55.7058	71.0167	75.4483
aatk	0.440803	0.504677	0.323517	0.603956	1.12263	0.917371	1.12686	1.01972	2.94029	3.07088	3.01282	3.31519	2.85907	3.64316	2.27928	1.92672	1.69113	1.64938
abat	94.8189	90.4727	79.316	72.4041	72.6739	71.4559	62.5589	61.3423	41.2244	43.0843	44.0799	44.0733	28.4608	29.1049	11.9108	15.1438	3.79117	4.02858
abca1	0.390119	0.574953	0.669383	0.610607	0.582655	0.787097	0.872631	1.0504	1.69949	1.57807	1.41508	1.72933	1.38067	1.46487	0.502128	0.890138	9.72756	10.0859
abca10	0	0	0	0	0	0	0	0.0226675	0	0.0166726	0	0	0	0	0	0	0.0383155	0
abca12	1.08088	2.17053	2.58766	2.60294	1.25408	1.76829	0.932333	1.99604	0.035682	0.0500096	0	0	0.0243264	0.0192923	0.00661302	0.0663193	0.820911	0.63045
abca2	0.42473	0.280543	0.248402	0.274802	0.811274	0.813609	0.874648	0.681287	3.68777	3.89635	4.31658	4.45872	5.75727	5.19183	2.51802	6.83519	0.846071	0.612992
abca3	18.7733	18.3176	20.1118	20.1162	21.8339	22.3832	20.7219	20.6871	21.2999	23.3823	24.9816	23.1893	22.05	17.5498	4.5441	8.0991	19.9435	17.1417
abca4	0	0.0271833	0.0141582	0	0	0.0437971	0.0730597	0.0134721	0.0395931	0.0495457	0.20179	0.32241	0.494869	0.4103	0.220136	0.245295	0.0227723	0.0989934
abca5	0.0436398	0	0	0.0232525	0	0	0.0216922	0.140001	0.0587779	0.0441319	0.136167	0.127636	0	0	0.0272336	0	0.540906	0.440882
abca8	1.55862	1.20758	1.56226	1.32427	1.46202	1.48537	1.27729	1.17766	0.964539	1.1644	0.736067	0.616025	0.290109	0.409021	0.420612	0.175756	0.0652662	0
abca9	0.197111	0.202527	0.295358	0.0933566	0.0996882	0.261046	0.653192	0.321195	0.722714	0.738273	0	0.0960836	0.201108	0.106327	0.0546703	0.0913778	0.135731	0.0245848
abcb10	23.6401	21.2081	25.394	23.7419	32.0056	29.5891	33.7743	33.8657	47.1498	47.6094	43.5973	40.9836	41.2705	45.5162	32.2106	35.8569	42.562	43.398
abcb11.2	0	0	0	0	0	0	0	0	0	0	0	0	0	0	0	0.0475755	0	0
abcb5	0.651538	1.78339	1.20502	0.944268	0.415186	0.388292	0.362726	0.692752	0.649387	0.808233	1.3011	0.876572	1.91448	2.24582	70.6501	104.114	241.342	251.211
abcb6	18.7206	20.0505	21.8895	20.8128	24.1202	23.8581	23.028	23.5861	30.2481	29.0021	28.5061	29.4408	24.436	21.6823	2.31054	3.91019	7.34978	7.71481
abcb7	29.553	33.9037	31.748	30.2711	33.8902	32.088	33.5195	32.328	43.6068	43.5952	61.857	59.679	51.3849	51.0088	24.5976	28.3781	12.5199	12.7745
abcb8	0.469961	0.253509	0.490429	0.166939	0.356521	0.622397	0.73975	0.538457	2.71656	2.45551	1.75968	1.66088	4.07567	3.04212	7.4298	10.0491	10.0118	8.79241
abcb9	0	0	0	0	0	0.0405207	0	0.0373929	0.0824199	0.137517	0	0.119316	0.686771	0.495137	1.01834	1.70208	57.7703	59.303
abcc1	3.77503	2.84747	3.46528	3.17097	3.95879	4.02901	5.01863	3.74515	7.30779	6.99643	7.33535	9.26581	7.86175	8.55271	2.71613	4.01481	3.99097	5.48393
abcc10	0.817635	0.804873	1.06709	1.54588	1.98088	2.27921	3.01541	2.32086	4.97345	5.47681	9.31612	8.48556	9.08219	8.99541	4.87206	5.22714	2.53361	1.62839
abcc12	0	0	0	0	0	0	0	0	0	0	1.15167	1.59473	1.241	1.05207	0.383893	0.233328	0.086645	0
abcc2	0	0.0147073	0	0	0	0	0.0316227	0	0	0.0107225	0.0198503	0.0465165	0	0	0.0198505	0.132715	0	0.0178532
abcc3	1.42737	1.06521	1.35083	1.20085	1.33929	1.66649	2.48949	1.37718	0.826339	1.26619	0	0.0732403	0.114972	0.0303932	0	0	1.86231	1.29305
abcc4	0.927554	1.6275	1.23715	1.39397	1.67796	2.10248	2.08069	2.11459	2.38651	2.27689	0.890525	1.426	1.78353	1.15465	1.21706	1.14115	2.06354	2.05572
abcc5	3.17791	2.87993	2.6204	2.43832	3.0955	2.49997	2.64118	2.23708	2.17439	2.45101	1.45962	2.02622	1.88705	1.77425	1.57069	2.12145	9.47318	9.98843
abcc6	9.52288	7.64127	9.8527	8.66258	14.6396	14.7304	15.3946	14.8403	20.9699	19.3851	16.8536	17.8067	8.94489	9.62153	0.880416	1.68178	0.208173	0.226238
abcc8	0	0.0450052	0	0	0	0.0241705	0.0725755	0.223048	0.360531	0.278898	0.303716	0.569374	0.782073	0.649766	0.607437	0.964525	0.226214	0.355107
abcc9	0.344454	0.169881	0.353926	0.19577	0.130655	0.228091	0.342438	0.378872	0.231971	0.232225	1.26108	1.20893	1.68691	1.33782	1.49038	1.48506	2.09914	1.44353
abcd1	1.86472	2.00438	2.64063	2.39476	3.8267	3.84681	5.60894	4.98151	10.2609	10.3796	9.32932	9.22958	7.3906	8.47262	1.47201	2.09464	2.07422	1.78906
abcd2	0	0.256187	0.177911	0.0492048	0.105084	0.137588	0.0918062	0.296257	0.435333	0.46694	0.230516	0.202569	0.635981	0.224165	1.61362	0.963237	4.4354	3.83549
abcd3	35.4561	34.9545	42.7659	44.6748	61.2359	62.7191	66.1829	72.3572	79.4074	78.4121	91.5391	95.3233	95.9726	95.8645	42.1949	38.658	11.0944	13.6403
abcd4	14.9641	17.2452	16.2326	15.1803	17.6417	15.6668	16.4401	18.6176	20.276	18.632	23.2758	23.986	21.7321	23.0708	8.86167	8.53078	5.0825	4.28768
abce1	245.175	238.972	252.747	247.681	275.176	284.477	287.351	294.564	270.954	284.112	193.688	188.595	193.415	205.098	326.04	320.069	454.983	455.773
abcf1	29.8748	22.3756	23.8974	23.179	38.0212	32.8407	44.4631	44.718	67.8576	73.8803	71.739	71.8557	74.33	70.9287	67.9781	70.6143	44.4595	42.2624
abcf3	40.2406	43.4373	52.8631	50.8178	73.9387	80.1929	92.2298	93.7307	104.312	105.527	118.272	129.18	129.57	129.994	111.016	121.505	95.7723	100.19
abcg1	0	0	0	0	0	0	0	0	0	0	0	0	0	0	0	0	0	0
abcg2	15.061	12.677	13.712	13.5683	15.9417	14.6239	15.0475	14.941	23.0678	23.5996	14.86	15.0494	13.048	16.274	5.90654	4.70114	27.5827	32.4637
abcg4	0	0.0998007	0.129951	0	0.0307025	0.133997	0.0536463	0.123654	0.0545107	0.236472	0.1347	0	0.206461	0.425715	0.269403	0.112572	0.0418031	0.030287
abcg5	0	0	0	0	0	0	0	0.0543148	0	0.0799001	0	0	0.0906877	0	0.147918	0	0	0.26607
abcg8	0	0	0	0.0483582	0	0	0	0	0	0	0	0	0.0694487	0.110154	0.0566379	0	0	0.0509392
abhd10	7.80573	7.40094	7.70946	8.4235	10.9062	8.9309	11.3945	7.60756	48.5083	45.0976	38.7228	34.1003	27.2188	29.3812	26.7608	27.6206	28.3209	29.503
abhd11	19.6318	20.1033	23.4495	20.3922	20.4113	18.7607	19.558	19.0173	17.1176	17.3872	13.0508	17.7694	21.6955	20.6671	26.9787	27.9353	25.9341	27.2798
abhd12	5.23173	4.59843	6.81097	6.34801	10.0205	10.393	11.8441	12.1309	16.1861	18.3516	13.9322	16.2863	18.3124	20.244	5.1721	8.15854	1.36434	1.42458
abhd12b	0.6519	0.904248	0.941943	1.3894	0.741816	1.05221	1.05314	0.672223	0.0548773	0	0.20341	0	0	0.296708	0.101705	0.849969	0	0.0914721
abhd13	14.1659	14.1354	18.9771	18.2556	26.4664	26.9631	34.0612	35.4506	44.4162	46.2196	43.5845	44.7078	37.7631	38.4652	6.20878	8.93431	6.78855	6.98933
abhd14a	9.21751	7.89565	9.81368	9.51249	11.1513	10.312	13.6007	11.7393	6.0768	6.73761	15.5007	21.7091	18.2644	15.0736	13.321	9.71568	3.15688	3.26745
abhd14b	6.57328	5.39223	7.45531	5.08416	8.08314	4.21229	9.59142	6.99685	1.99917	3.00205	1.72022	1.0853	3.08286	1.8015	1.58791	1.54821	4.4351	4.99848
abhd15	0	0	0	0	0	0	0	0	0	0	0	0	0	0	0	0	0	0
abhd16a	8.14299	8.15758	9.09189	8.61188	10.5999	11.6421	13.3696	12.3267	24.7189	24.6213	28.642	27.515	32.9493	35.6397	31.953	33.5887	13.4766	12.0492
abhd17a	155.723	149.224	171.839	168.235	166.523	168.737	161.295	174.666	181.301	181.93	192.572	199.464	194.99	193.541	99.463	105.521	41.4028	36.5142
abhd17b	187.615	187.026	212.252	212.223	221.729	230.315	232.969	240.347	249.216	253.565	202.25	214.351	203.937	208.744	104.277	128.334	70.853	70.0823
abhd17c	289.896	279.254	301.462	289.522	282.193	297.413	271.789	270.16	336.558	333.553	272.761	293.19	260.542	274.294	138.84	153.412	82.0913	87.1525
abhd18	6.35161	3.73318	4.71841	5.9082	8.39146	7.59203	11.7192	13.3706	14.8986	13.4634	12.0256	11.1776	11.2858	11.7596	5.7105	5.27767	1.41775	2.35648
abhd2	6.57284	6.25644	6.68754	6.18235	9.78361	10.4873	10.6403	10.8267	14.1776	14.2582	9.60762	10.082	6.44379	6.76825	0.862485	0.871657	0.373483	0.52315
abhd3	7.4756	10.1936	10.4355	9.92425	5.76725	7.677	5.03854	5.86496	2.90118	1.96472	0.869775	0.833808	1.64825	0.922703	0.316284	0	0.883397	0.924496
abhd4	5.67861	5.95447	4.63981	6.69981	10.5582	11.734	13.559	13.059	17.0725	15.7581	19.4906	23.1334	23.9769	22.3382	17.0228	18.5099	4.7133	5.74836
abhd5	17.8754	21.0343	19.8449	22.0968	24.104	23.348	24.346	25.0684	30.637	28.3206	26.382	25.2257	19.2182	21.4787	3.06769	4.19518	6.02372	7.27381
abhd6	1.73309	0.915796	1.72908	1.71496	3.45124	3.0125	3.75357	4.14158	4.54352	3.75565	6.25747	3.98269	4.64162	4.05671	0.772533	0.903865	0.863089	1.73701
abhd8	0	0.166915	0	0	0.136932	0	0	0	0.0810386	0.0811276	0	0.263962	0.276243	0.146052	0.0750953	0.251034	0	0.135079
abi1	88.2223	91.1126	90.9441	89.3782	81.9116	82.1287	80.004	78.2202	84.3719	82.0176	102.387	94.9576	94.6757	93.1556	74.6851	82.2663	45.7066	45.1025
abi2	73.5126	67.0702	72.0616	75.7674	86.3473	95.2118	100.894	99.6183	121.585	117.53	174.132	168.084	171.254	169.063	146.524	171.909	65.9839	64.1098
abi3	0	0	0	0	0	0	0	0	0	0	0	0	0	0	0	0	0	0
abi3bp	0.681521	0.567201	0.612729	0.65364	0.620418	0.541548	0.677533	0.437278	0	0.0153157	0.170122	0.132886	0	0.0551449	0.113415	0.0473915	0.0703943	0.0765028
abitram	8.58343	6.13342	9.30178	9.97851	18.4247	18.3108	29.4783	31.4703	56.8194	55.435	46.6259	47.4988	71.8015	78.8441	173.235	152.203	218.069	209.565
abl1	5.34908	4.28795	5.50362	4.69434	7.08565	8.9648	8.24832	7.71117	14.6881	16.6022	13.5384	12.7871	15.0801	13.1453	5.51876	14.51	15.1897	13.5148
abl2	134.312	149.748	128.329	124.709	135.389	136.622	121.803	119.566	152.786	158.968	121.163	121.22	101.634	103.349	20.5006	38.898	35.0585	35.7798
ablim1	6.84857	5.9245	7.04635	7.01047	11.2289	9.11874	11.4695	8.81986	2.54577	2.89609	21.9667	24.697	24.9069	21.4807	16.4215	16.2841	12.6645	9.75432
ablim2	0	0	0	0.0281386	0	0	0	0.0242028	0	0	0	0.019307	0.0202053	0	0	0.0550843	0.0409106	0.0741009
ablim3	0.0577906	0.0534408	0.092781	0.0205283	0.0657616	0.172205	0.325564	0.105942	0.0259459	0.0389615	0.0240429	0.0281706	0	0.140283	0.0480861	0.120559	0.238768	0.302735
abo.1	11.3597	10.3642	10.6207	10.3576	10.438	10.0161	10.2665	9.46571	12.3752	11.9383	5.23147	4.575	4.92732	3.90766	2.12293	3.86515	8.37653	7.63731
abo.2	223.294	217.065	226.17	221.947	216.817	229.883	228.076	229.402	230.058	230.623	198.655	186.293	147.215	143.607	13.1236	10.1239	1.6112	2.91836
abo.3	0	0	0	0	0	0	0	0	0	0	0	0	0.570658	0.226283	18.5691	17.5799	166.325	179.983
abo.4	60.138	52.2566	54.5584	53.0339	57.8935	53.7558	63.6049	51.3668	91.9506	96.6843	37.7157	45.0646	42.0663	39.8883	72.0758	70.786	89.3394	90.6478
abo2	0	0	0	0	0	0	0	0	0.0384857	0	0	0	0.0874596	0.0346804	3.17403	2.80161	14.7422	18.1544
abr	88.9152	91.3486	81.3915	80.502	91.46	100.335	99.9205	96.8185	109.039	111.724	111.3	115.676	109.788	107.237	32.4762	42.7459	3.90209	3.68756
abra	0.0506423	0.0468305	0.146348	0.161902	0.172882	0.100603	0.151038	0.185675	0	0	0	0	0	0	0	0	0	0
abracl	3.04303	3.97268	3.44857	3.81508	7.53657	7.28968	10.4993	14.9306	18.0822	14.9643	22.3412	19.8944	31.5039	33.2403	69.0349	52.279	136.727	133.421
abraxas1	71.1305	64.4818	72.0704	76.8451	83.3315	78.9966	83.7064	93.6904	78.5802	80.7433	83.7102	90.5054	73.2873	77.6084	28.2531	29.8918	11.4979	11.5263
abraxas2	54.064	57.7461	67.7152	64.1831	73.8858	84.537	87.169	92.5651	98.445	99.8688	90.0622	94.3686	80.4328	80.1523	21.5885	22.0203	40.9544	39.3305
abt1	6.74166	3.31608	7.46132	6.57286	16.6489	12.2528	22.2456	18.1438	28.3034	25.9169	36.8797	25.1716	35.5627	34.6449	59.9746	49.3737	23.7795	23.0252
abtb1	12.1515	11.4162	11.7364	10.5041	13.6069	13.3217	13.9439	13.9818	10.7951	11.1556	11.7781	10.8228	9.94143	9.92385	8.2286	10.3826	5.50789	6.53
abtb2	0	0.102234	0	0.117814	0	0.146415	0.219817	0	0.0248176	0.0745347	0	0.323347	0.281993	0.17891	0.321966	0.153755	3.42578	3.92989
acaa1	4.87828	4.11883	4.97157	5.04788	8.20603	8.07576	8.50461	7.7116	12.3792	11.8208	16.7657	17.0593	11.902	11.6701	4.76502	4.42467	0.766771	0.952351
acaa2	3.37652	3.28387	3.92547	3.84635	5.8296	5.95588	9.3179	6.56336	15.7605	15.974	11.8435	11.8336	14.5224	17.3817	9.66376	10.2015	10.102	10.3905
acaca	15.3759	15.08	17.7938	18.4686	28.1858	27.2089	30.6762	28.7163	35.1817	37.2635	34.7136	37.7955	27.4669	27.9612	3.40589	6.8422	1.3009	1.03088
acacb	1.1794	1.0637	1.23428	1.19477	1.82257	1.86567	2.33052	2.13539	6.95224	7.5096	3.81634	4.32248	4.74642	5.31937	3.12578	6.10541	8.34696	9.30009
acad10	9.87852	9.86469	9.96624	9.03212	10.975	10.5668	11.1282	9.34933	9.01452	9.3988	8.46279	10.0439	8.09588	8.30057	7.40499	5.36538	8.46772	10.2359
acad11	20.9045	23.69	20.2948	20.8355	21.9221	22.6774	17.563	18.2594	17.0317	16.4701	19.7985	20.62	16.8118	17.8102	9.05517	10.2611	1.96871	1.33434
acad8	6.98183	5.71314	7.59638	6.2091	7.25894	7.23419	5.9922	6.90598	6.08876	6.77272	4.20029	5.28867	4.07418	5.60866	4.07494	5.55357	2.8016	3.83408
acad9	17.0358	16.4719	19.8847	19.8101	29.4888	29.1022	42.5334	36.2655	64.7627	61.1301	79.6476	78.7959	93.0776	96.9849	105.205	98.3979	45.0511	39.9283
acadl	40.678	33.6099	32.551	33.9694	28.126	29.3066	24.1189	21.4015	22.1735	22.8435	26.7512	26.3421	18.1459	19.2615	11.3835	10.5599	7.63076	7.52505
acadm	61.5717	63.4918	70.5539	71.959	84.5825	81.152	86.0154	90.3506	89.7722	85.1877	115.419	123.003	118.963	117.802	106.573	111.294	36.826	36.7594
acads	14.5213	12.3773	15.9342	15.2728	18.3921	19.5658	24.73	23.1481	29.848	26.3479	39.9516	36.6544	46.8628	49.579	51.772	46.757	36.4867	33.5933
acadsb	52.8481	46.8911	55.0837	53.2768	63.572	60.9959	68.7424	67.2534	62.939	60.4552	54.0419	62.1161	50.4763	43.561	17.6716	14.0815	11.0534	9.17883
acadvl	3.64214	2.47338	4.05659	3.63869	7.18812	8.6484	8.59947	9.07624	20.4271	21.5238	13.2111	13.3155	27.87	24.0366	57.8879	62.2086	81.382	74.7413
acan	0	0	0	0	0	0	0.0159805	0	0	0	0	0	0	0	0	0	0	0.0180441
acap1	0	0	0	0	0.0407495	0	0.0356007	0	0.120581	0.144856	0.491644	0.628417	0.657656	0.391171	0.715122	1.12057	0.665791	0.321585
acap2	12.7488	14.2751	19.0683	19.9663	23.8697	29.2098	29.0736	33.4885	51.9524	54.0965	44.6343	48.7829	46.8762	52.6985	22.8257	23.4517	26.4416	23.9581
acap3	25.3489	25.599	21.2399	21.5248	21.5561	20.4464	18.5764	18.3223	16.8001	16.059	21.2527	20.7355	10.8871	13.3419	0.883862	1.24229	1.57097	1.51759
acat1	16.0517	10.348	15.4623	14.8574	17.6394	17.7658	22.7968	16.7308	54.9145	51.9447	18.7749	17.7058	25.2677	22.9333	26.4453	24.8753	12.648	9.67852
acat2	11.4626	11.409	15.509	14.5464	15.3338	14.6013	15.919	16.3615	21.5084	20.0572	24.9	22.6489	26.1131	18.3729	24.1357	20.4444	5.96507	3.33957
acbd3	20.6519	19.6787	23.6128	23.1242	35.1144	37.3395	42.1333	41.2061	53.1323	55.6121	59.3589	57.907	48.7833	48.678	33.7328	35.6525	72.7585	68.0017
acbd4	2.71511	3.04243	3.75388	3.54012	5.48858	5.39367	6.25584	5.38723	8.66912	8.33408	6.33893	7.66076	5.71958	5.35013	1.47511	1.39936	2.07858	1.61354
acbd5	146.328	157.062	166.891	171.745	183.769	183.221	183.383	181.368	128.999	130.252	120.635	121.819	106.716	102.839	49.9277	58.4614	7.23645	8.327
acbd6	216.843	235.015	221.628	212.704	194.757	188.547	175.466	178.092	141.343	141.343	147.608	142.944	131.037	146.115	104.678	104.843	35.5754	42.4925
acbd7	0	0	0	0	0	0	0	0	0	0	0	0	0	0	0	0.544667	0	0
accs	0	0	0	0	0	0	0	0	0	0	0	0	0	0	0.0898134	0	2.22981	1.61553
ace	0	0	0	0	0.104549	0	0	0.0280712	0	0.0206472	0	0.0447859	0.0937393	0	0.0764478	0.383332	2.08778	1.51263
ace2	0	0	0	0	0	0	0	0	0	0	0	0	0	0	0	0.0804086	0.119437	0.173069
acer1	0	0	0	0	0	0.191596	0	0	0.194855	0.130046	0.240752	0	1.47604	1.63883	12.0377	11.2673	4.33348	4.43886
acer2	7.4333	7.50636	5.79857	6.22043	6.53853	6.06969	5.259	6.01917	5.09805	4.70397	2.33361	3.66789	1.95417	2.49071	1.25219	1.42701	8.196	8.70244
acer3	2.17101	1.53523	2.33733	1.22482	5.08624	3.93227	4.44358	5.26752	12.9865	12.9147	15.3015	10.4583	10.7495	12.09	14.6641	15.7184	56.9844	61.4991
ache	0.672144	0.70828	0.82815	1.08274	0.90715	1.19551	1.72491	1.5044	1.66323	1.49644	4.3506	3.70313	4.23425	4.02204	1.36567	2.11958	0.266401	0.228105
acin1	169.551	166.753	166.334	160.984	169.562	181.567	167.635	164.344	161.915	164.772	200.143	199.954	209.046	198.324	307.237	323.598	385.28	387.11
ackr3	0	0.0611624	0	0	0	0.131391	0.0657538	0	0	0	0.495303	0.580337	7.99663	9.39231	13.3733	15.8675	32.997	27.2479
ackr4	0	0.169761	0	0	0	0.0911715	0	0	0	0.0618828	0	0	0	0	0	0	0	0
acly	66.2853	64.6943	66.6303	62.0729	80.1178	81.4632	80.9206	73.5381	73.0191	71.0848	96.3622	96.4319	89.9858	81.2852	62.37	67.9936	29.5327	26.0233
acmsd	0	0	0.0730596	0	0	0	0	0	0.153231	0.0511332	0.283986	0	0.464296	0.644376	1.79859	1.424	0.23502	0.255413
aco1	25.9442	24.5158	33.0763	32.9052	44.1711	48.1878	55.3621	52.9668	50.6402	51.1163	69.3627	73.3927	88.0031	90.5091	75.2732	83.048	16.8255	19.8292
aco2	88.5432	77.3104	90.413	88.7913	135.983	133.463	162.159	154.771	200.939	196.782	163.3	165.467	103.035	101.413	15.3847	18.0591	4.22779	4.91152
acod1	2.42397	3.55363	3.36007	3.33915	3.96927	4.22809	5.34855	5.52744	12.9797	12.1967	12.8394	11.4989	11.8529	11.1222	1.99233	3.33004	0.0915996	0.0663654
acod1la	0.0621342	0	0.0598526	0.0662136	0.0707043	0.370296	0.0617706	0	0	0.0418899	0.0775499	0	0	0.0754132	0.155101	0.12962	60.2635	39.5468
acod1lb	0	0	0	0	0	0	0	0	0	0	0	0	0	0	0.228585	0	38.6853	28.2337
acot11	36.2736	36.1402	39.9574	37.8134	47.7012	46.5187	51.271	51.5885	47.6351	48.0621	57.3216	54.714	49.5594	48.4283	16.4299	18.4297	0.997104	1.34633
acot12	31.3847	26.6989	30.3643	34.711	42.0037	42.2907	55.09	46.8148	59.2542	58.3645	63.9171	64.7358	50.4787	45.1339	20.3555	16.4873	2.8312	2.82047
acot13	0.369255	0.170731	0.711391	0.786996	2.73121	1.46708	1.83547	0.676918	2.23805	3.11182	3.45651	2.69995	3.9558	5.60213	5.53045	5.00705	8.00947	8.08274
acot2	12.3279	11.6265	11.8752	15.6604	12.449	12.3261	12.7428	11.8984	11.4911	12.4945	18.6472	16.7148	15.1185	17.2417	10.5974	11.2409	10.4988	11.1808
acot7	5.2785	5.84499	6.86593	6.98653	6.00656	8.2485	8.35606	7.7967	10.1209	9.36137	12.6727	11.3083	9.67339	9.63029	0.92318	1.33262	1.40645	1.43414
acot8	0	0.101972	0.212446	0.352537	0.376446	0	0.548135	0.202151	0.148525	0.446063	0.275262	0.32252	0	0.267678	2.61501	1.84034	3.92956	2.72325
acot9	40.4887	38.2079	37.9703	44.1042	44.6581	42.7212	41.4882	38.4419	40.8771	41.8769	36.4346	39.8605	31.4582	33.3762	9.78781	10.2338	0.802874	1.08583
acox1	5.02404	3.64462	2.33634	3.13849	3.00635	2.58115	3.40152	2.46131	30.4799	30.601	6.10835	5.13027	4.24214	3.88995	2.21632	2.34915	3.15386	5.63964
acox2	19.6313	17.8227	21.4219	23.6986	22.688	25.6434	24.7512	24.5075	27.2674	29.7445	34.9024	40.7449	26.2885	25.44	7.27403	7.03887	1.50494	0.803421
acox3	54.708	61.0046	55.5656	51.8113	44.9061	42.5624	39.9603	40.5359	43.1323	39.5068	42.9115	41.5752	36.1529	33.5612	21.8273	24.5447	3.2628	2.41534
acoxl	40.1309	49.3341	40.4857	41.9349	38.1451	38.3795	39.2895	39.0519	30.1531	30.9403	38.1579	38.1661	21.164	20.2811	3.17279	2.47478	0.210057	0.418522
acp1	234.317	234.66	246.508	247.416	222.062	223.084	228.398	244.128	215.856	209.442	202.7	200.704	198.884	217.417	204.843	192.366	134.229	128.224
acp2	79.406	99.9215	96.212	96.9297	75.1504	78.2008	75.9024	76.3673	58.5742	62.0653	100.704	97.669	97.7526	93.831	79.0553	87.6455	38.8798	46.0042
acp3	0	0	0	0	0	0	0.219254	0	0	0	0	0	0.225017	0.713809	7.52389	8.28154	42.9404	49.9262
acp4	0	0	0	0	0	0	0	0	0	0	0	0	0	0.112849	0	0	0	0.10437
acp5	166.689	164.853	132.21	139.138	101.198	94.516	72.0275	75.9027	65.2164	63.9809	63.8083	59.4671	55.5186	59.0778	27.6377	28.5257	21.581	19.4731
acp6	0.427413	0.543458	0.360254	0.227738	0.607958	0.796007	0.902938	0.636622	0.971458	0.864466	4.00092	4.29715	7.44063	6.09541	5.73469	17.7214	2.56608	2.15903
acp7	0	0	0	0.133973	0	0	0	0	0	0	0.15691	0.42898	0.384805	0.406899	0.156911	0	0.0649276	0.0470411
acr.2	0	0	0	0	0	0	0	0	0	0	0	0	0	0	0	0	0	0
acrbp.1	0.133857	0.928364	0.451297	0.570582	0.7616	0.864217	0.399222	2.45387	0	0	0	0	0.307286	0	0	0	0.103696	0
acrbp.3	0.924899	0.855282	0.356374	0.591373	0.77181	1.2249	0.612991	1.18687	1.49488	1.28867	0.230874	0.18034	1.22675	0.449025	0.46175	0.257262	0.191066	0.484506
acrbpl	0	0	0	0	0	0	0	0	0	0	0	0	0	0	0	0	0	0
acsbg1	0	0	0.0648404	0	0	0	0	0.123396	0	0.136142	0	0.0984357	0	0.0816977	0.252039	0.561688	1.0429	1.889
acsbg2	120.123	123.565	119.69	123.542	133.692	132.66	133.314	113.482	152.488	151.757	155.239	158.387	137.806	130.684	51.5351	66.0608	27.2133	23.4245
acsf2	70.234	73.3842	73.5832	75.8807	68.1266	71.6381	66.3882	65.7125	61.7682	61.1446	86.379	86.8405	90.5505	85.1785	67.3788	71.2879	21.1612	20.7856
acsf3	0.422955	0.537789	0.280104	0.450724	0.511373	0.73519	1.39284	0.702671	3.22222	2.31684	2.24354	2.822	2.99375	2.75924	2.77145	1.70953	0.327653	0.326411
acsl1	74.6522	78.4496	84.3571	90.7251	110.821	109.832	128.948	117.665	107.069	104.26	113.092	116.982	107.913	105.681	81.465	91.7273	116.025	112.657
acsl3	75.3523	77.9714	78.5699	81.251	85.6609	87.0577	81.7904	75.973	93.4491	96.6367	102.869	107.093	97.5001	104.505	49.009	56.8866	34.4103	38.8161
acsl4	115.819	116.941	128.642	125.972	143.461	142.356	135.913	138.51	145.223	150.974	142.534	153.443	114.448	120.244	48.8294	58.4187	70.0758	78.5737
acsl5	0.0514487	0	0.0495595	0.109653	0.175635	0.153307	0.153443	0.0471579	0	0	0	0	0	0	0	0	0	0
acsl6	0.114574	0.141266	0.0735777	0.0406987	0.173836	0.151737	0.0759355	0.140024	0.668712	0.386219	0.810332	0.893601	1.16897	1.3906	0.333668	0.239016	1.18343	0.342966
acsm3	2.50763	2.35455	2.34122	3.1656	2.5023	2.56739	2.30119	1.98024	2.39023	2.15877	4.67059	4.11843	3.60155	4.21414	2.84089	2.33394	0.597721	0.21653
acss1	0	0	0	0	0	0	0	0	0	0	0	0	0.0344702	0.027337	0.0562234	0.14096	6.63035	8.74798
acss2.1	13.3801	18.7201	21.4254	21.6192	22.2946	25.1992	25.3511	29.9038	24.9843	25.7439	55.3584	53.4273	54.3839	49.0878	23.9111	30.4501	3.90377	2.58453
acss2.2	0.899197	0.831515	0.734939	1.45187	0.682148	0.974341	0.948113	0.249759	1.41297	1.48801	0.510132	0.398475	0.375313	0.198431	0	0	0.168869	0.0917614
acss3	44.9061	44.4702	40.5112	37.1631	41.5792	39.3455	43.0607	36.546	38.8431	38.8109	88.6223	88.7325	76.0905	69.2411	56.4174	58.3087	32.3499	33.1208
acta1	0	0	0	0	0	0	0	0	0	0	0	0	0	0	0.449004	0.18762	0.278687	0.706697
acta2	0.2163	0	0.104179	0.345751	0.123067	1.18164	0.322551	0.594781	0.291332	0.218739	0.674911	0	0	0	0.944882	1.57931	76.911	67.7421
acta4	0	0	0	0.108701	0	0	0	0	0	0.0687695	0.254623	0	0.156109	0.123804	0.127312	0.212794	90.0828	74.9992
actb	26.4389	25.7046	25.1603	25.1955	36.1754	37.1303	54.9506	45.9785	73.4798	68.1754	59.0184	58.638	164.906	174.213	597.266	548.718	2222.78	2232.97
actc1	0	0	0	0	0	0	0	0	0	0	0.243845	0	0.149501	0	6.34002	11.4121	1546.8	1257.1
actg1	159.825	134.155	165.151	175.49	259.544	256.612	336.188	299.722	542.853	543.536	601.861	540.47	814.125	756.553	901.601	890.22	6866.81	6485.07
actl6a	343.22	331.304	335.344	343.178	358.634	351.31	373.169	385.297	391.109	386.134	338.023	329.907	379.556	402.97	533.531	466.699	521.249	544.857
actl6b	0	0	0	0	0	0	0	0	0	0	0	0	0.179973	0.142729	0.293548	0.245323	0.182199	0
actn1	84.0506	78.2385	90.3063	86.7907	104.82	107.584	114.798	105.78	113.675	115.815	141.303	139.74	141.4	132.179	134.84	131.614	178.102	178.359
actn2	0.554299	0.620488	0.562047	0.683958	1.06232	0.898296	0.406041	0.668514	1.04128	1.23911	1.74776	1.8345	2.00915	1.2393	0.327707	0.547741	0.0452002	0.19649
actn3	0	0	0	0	0	0	0	0	0	0.0202725	0	0	0.138057	0	0	0	2.42259	2.29527
actn4	53.8993	44.1972	54.4731	52.9953	78.3443	74.0047	90.3228	88.8727	148.782	147.842	150.34	141.965	153.173	149.559	139.562	146.298	174.538	174.758
actr10	60.9807	48.1953	66.2043	65.3596	94.0361	95.1986	112.962	109.746	119.486	118.786	175.515	182.13	173.178	181.436	142.625	147.049	49.559	46.1841
actr1a	31.8882	32.2525	38.3227	37.0859	52.4235	50.023	56.7733	57.4738	66.6446	67.3896	79.4081	77.2352	77.3094	78.0576	40.087	32.9417	35.1542	31.1489
actr2	153.229	164.399	174.497	167.097	185.341	194.988	190.441	195.61	192.117	195.425	170.605	176.307	168.418	177.861	105.307	113.402	85.9626	86.6324
actr3	129.09	117.72	148.89	147.488	151.812	154.191	158.623	148.093	157.165	150.508	204.442	192.809	203.946	194.831	210.487	191.602	301.336	280.199
actr5	7.84897	9.14729	12.3768	10.1403	14.0703	12.1748	11.9718	12.2698	13.468	14.0627	19.7939	14.7801	16.3728	15.1379	27.3762	27.2526	28.7361	24.8027
actr6	195.414	174.429	179.43	178.107	161.332	169.942	162.689	169.18	168.484	163.649	110.595	115.383	82.2321	90.0426	22.1191	22.8117	44.1076	46.9827
actr8	56.6348	49.7876	68.0704	62.298	84.2411	92.4532	95.4833	92.0082	159.552	152.268	192.91	187.662	217.255	199.293	173.62	164.788	30.8396	24.7127
actrt2	0	0	0	0	0	0	0	0	0	0	0	0	0	0	0	0	0	0
acvr1	253.724	241.783	239.047	225.588	251.248	255.181	245.4	224.403	237.738	242.535	218.376	222.21	171.857	171.041	141.607	156.068	125.393	127.984
acvr1b	21.6572	20.2306	21.286	19.9362	29.9039	32.311	32.6896	33.4885	55.1975	58.5226	21.921	20.8566	21.5575	24.1487	16.0975	25.4366	15.2087	18.4308
acvr1c	3.88319	5.5128	4.58355	5.59523	5.47682	4.94355	5.3829	5.56459	6.18788	7.19024	7.30406	7.51827	4.60366	5.44328	1.16047	2.28193	0.169477	0.0613943
acvr2a	21.5065	19.5794	24.1375	23.6469	32.7443	34.51	36.2477	36.3542	56.2721	57.3905	52.9772	55.7091	54.2698	53.622	24.1791	32.797	23.1956	21.6527
acvr2b	22.9022	22.5469	26.4735	23.8051	43.8629	45.3563	48.0585	45.2786	79.9169	86.1808	44.2398	45.2396	51.2269	49.8632	35.8846	62.4778	65.5082	56.7168
acvrl1	0.948386	1.23577	1.41187	1.37816	0.833924	0.899185	1.02855	1.34345	0.725779	1.13346	0.43043	0.441286	0.461818	0.575535	0.215217	0.53958	0.0667901	0.0967811
acy1.1	1.44734	1.57459	1.06615	1.72382	1.25945	1.35304	2.96238	3.04345	3.26813	2.86993	1.91269	2.11656	2.99682	1.75666	2.97532	2.30891	6.85923	9.84368
acy3	0.0700483	0.194327	0.134952	0	0	0.487038	0.139277	0.128413	0.141521	0.188902	0.437138	0.102437	2.14406	1.70037	13.2016	18.8508	149.336	161.745
acyp1	9.4669	7.08216	8.50449	9.63503	8.2308	8.241	7.29656	7.11739	9.74224	11.474	1.3276	1.39997	2.60464	2.06564	2.92075	3.55042	3.79049	6.44777
acyp2	0	0	0	0	0	0	0	0	0	0	0	0	0	0	0	0	0	0
ada	0	0	0	0.0749724	0.160114	0.20964	0.139883	0.257944	0.331654	0.42688	1.22932	0.823066	1.0767	1.62239	0.263426	0	0.327006	0.394869
ada.2	0	0	0	0	0	0	0	0	0	0	0	0	0	0	0	0	0	0.0980235
ada2	0.160148	0	0	0	0	0	0	0.0489304	0	0.0359897	0	0	0.163395	0.129582	1.26592	1.00227	3.88729	3.0561
adad1	20.396	18.8608	18.4891	18.2227	20.3411	20.5283	19.814	19.6901	16.5819	17.5935	21.7782	23.8726	22.0756	19.4368	9.67926	11.6483	5.04647	4.65737
adad2	6.58098	5.76193	6.8114	7.6099	8.76335	10.3613	14.8249	11.9359	17.9163	16.4728	11.7963	10.9548	10.6074	12.1511	10.8352	6.28019	8.02682	4.40097
adal	3.57537	4.66765	5.36872	6.16341	4.42751	4.17801	3.55445	5.20494	6.6569	5.1754	5.77491	6.76635	8.69053	7.78554	8.00618	10.3106	14.0117	11.8043
adam10	376.338	406.942	368.296	370.859	372.247	365.77	336.373	336.127	315.995	311.863	315.928	311.606	295.132	295.278	189.904	209.362	97.3068	94.9443
adam11	0	0	0.0224515	0	0.0530442	0	0	0	0.0313924	0.0157134	0.0290899	0	0	0	0	0.145867	0.397223	0.130816
adam12	0	0.0848501	0	0	0.0522062	0.0455696	0.0456098	0.252312	0.0308965	0.0309304	0.229043	0	0.140426	0.0556832	0	0	0.0710815	0
adam15	1.89843	2.16066	1.96939	1.94526	3.3235	3.55373	5.84343	4.75181	9.73617	10.0176	10.4802	12.1727	10.1689	8.55195	6.92608	9.21549	7.2402	5.90135
adam17	77.0798	87.5896	88.7361	82.8101	77.9957	73.3324	68.1623	67.1555	51.909	53.2078	79.9216	83.0266	65.6315	64.0957	11.2243	12.0249	13.3625	13.6464
adam19	0	0	0	0	0	0	0	0	0	0	0	0	0.880744	0.548809	0.205222	0.600277	0.191066	0.230717
adam22	0.545654	0.299012	0.330944	0.34458	0.459937	0.441615	0.562552	0.351955	0.476347	0.313372	0.454022	0.118215	0.371146	0.220756	0.126118	0.0421595	0.720163	0.476399
adam23	0.0233284	0	0	0	0.053092	0	0	0	0.0157104	0	0	0.0341149	0	0.084942	0	0.0973322	0.0722876	0.130934
adam28.1	20.5298	21.031	20.1695	19.3743	17.8214	15.9616	15.8403	15.7906	10.524	11.9817	17.1247	16.8782	20.6856	15.8264	6.67146	5.46891	24.1592	18.7267
adam28.2	0	0	0	0	0	0.356954	0	0	0	0.0302854	0.560667	0.0656922	0.343743	0.163566	0	0.0937122	0.139198	0.0504257
adam28.3	0	0	0	0	0	0	0	0	0	0	0	0	0	0	0	0	0	0
adam28.4	0	0	0	0	0	0	0	0	0	0	0	0	0	0	0	0	0	0
adam33	10.2596	15.7841	23.0454	23.1326	14.1189	18.9059	15.4697	20.3369	7.55559	6.19283	127.395	123.703	127.43	139.609	63.5409	78.0802	119.838	117.758
adam9	16.8018	19.9966	21.8908	19.6883	29.5433	30.4902	36.9533	33.6267	46.5652	49.1402	57.3867	55.9358	49.675	49.8722	9.97677	12.9086	16.7518	15.1774
adamts1	10.729	9.17261	11.3936	11.834	15.0718	16.9187	18.4286	18.343	25.7854	25.3458	33.5313	33.325	37.8408	36.4684	86.8786	97.009	15.0995	13.5369
adamts10	0.165018	0.0971073	0.18786	0.255785	0.102425	0.22351	0.119311	0.26126	0.353597	0.384327	0.168512	0.219381	0.137753	0.16387	0.0374474	0.0625909	0.534584	0.505194
adamts12	0	0	0	0	0	0	0	0	0	0	0	0	0.0768564	0	0	0	0.0389036	0
adamts13	0	0	0	0	0	0	0	0	0	0	0	0.0757957	0	0	0.776281	0.324376	0.160607	0.116362
adamts14	0	0	0	0	0	0	0	0	0.0155754	0	0	0	0	0	0	0.0482481	0.3225	0.233657
adamts15	0.150628	0	0.0725487	0.280906	0.0857022	0.0374037	0.0374367	0.103549	0	0	0.0469999	0.165207	0	0.045705	0	0	0.29172	0.0422712
adamts16	1.7704	1.37111	1.51353	1.22631	1.48576	1.40679	1.21003	1.17649	2.78692	2.81982	2.59633	2.36246	2.47237	2.79339	0.828621	1.15415	0.0342871	0.124208
adamts17	0.436799	0.334959	0.564433	0.44277	0.545538	0.370368	0.593112	0.341779	0.394605	0.330395	1.38287	1.79166	1.38588	1.26719	0.265938	0.266699	0.313618	0.322893
adamts18	0	0.0186533	0.116585	0.0429918	0	0.0200358	0	0.129425	0	0	0	0	0	0	0.528703	1.43074	7.18814	7.60811
adamts19	0.0522178	0	0	0	0	0.0518664	0.0778684	0	0.175829	0.0352044	0.391039	0.229087	0.0799151	0.0633776	0.0651737	0.0544667	0.121356	0.029308
adamts2	0.240413	0.127038	0.264669	0.146398	0.0781637	0.272909	0.0682874	0.157402	2.98368	1.80606	0.857315	0.552475	1.47173	1.95918	1.11452	0.573181	0.053212	0.115659
adamts20	0.0317463	0.0880703	0.0458708	0.0845764	0.0180625	0.0315327	0.0157803	0.0872959	0.0213794	0.07491	0	0.0232125	0	0	0	0.0331135	0.122965	0.124727
adamts3	4.50925	5.13072	5.59012	5.84994	6.82674	6.81573	8.63439	8.39216	12.7015	12.4775	14.7552	15.5395	13.202	14.1107	3.35236	3.64006	1.57954	2.15676
adamts4	0.0541089	0	0.234549	0.0864921	0.0615721	0.0537448	0.161377	0.0495962	0.109318	0.291835	0.472735	0.316511	0	0.394037	0.709106	0.338635	0.167667	0.0911083
adamts5	0.194595	0.102828	0	0.177747	0.221436	0.0276123	0.110547	0.229328	0.262099	0.224903	0.104089	0.243919	0.127634	0.067481	1.35317	2.20374	3.44567	3.68226
adamts6	4.96235	4.91661	5.64686	5.11381	6.85683	6.25598	8.13182	6.29791	7.8589	8.97045	8.60967	7.89479	6.05054	5.75813	1.49734	1.64951	1.26732	0.765163
adamts7	0.0892289	0.0165025	0.0171905	0.0380349	0.0406145	0.0531771	0.0177413	0.0490723	0.0360544	0.0481254	0	0.0260973	0.109246	0.173278	0.44547	0.260601	0.276494	0.340551
adamts8	0	0	0	0	0	0	0	0.021041	0	0	0	0	0	0	0	0	0	0
adamts9	0.0753801	0.0871328	0.145224	0.0200823	0.0643329	0.168464	0.318491	0.190007	0.46957	0.33033	0.752657	0.38582	0.519134	0.36596	0.211686	0.196566	2.30661	2.8135
adamtsl1	0.124456	0.0986475	0.10276	0.0378936	0.0809272	0.141279	0.0707018	0.0977801	0.191576	0.14384	0.110953	0.078001	0	0.0215792	0	0.0370904	0.275467	0.359244
adamtsl2	0	0.0307148	0	0	0	0	0.0330205	0	0.111842	0	0	0	0	0.0403134	0	0	0	0
adamtsl3	0	0	0.0206081	0.0227983	0.0730334	0	0.0425369	0.0392189	0.0288149	0.0576931	0	0	0	0.103863	0.080105	0.04463	0	0
adamtsl4	0	0	0	0	0	0	0.0248084	0	0.0336109	0	0	0	0	0	0.0622919	0.0520583	12.4495	12.4654
adamtsl5	17.3651	18.3169	23.7008	26.3143	34.9722	35.2906	47.9493	45.8373	52.7895	52.8176	77.2706	78.9759	70.6198	69.0505	17.4054	21.5873	3.37168	4.437
adap1	0.218494	0.101024	0.210471	0.256123	0.372946	0.325535	0.477874	0.300407	0.706289	0.707065	0.627217	1.21418	0.568458	0.795568	0.136352	0.136742	0.57549	0.367899
adap1l	0.271321	0.209082	0.261358	0.433701	0.0514573	0.0898316	0.0449555	0.414488	0	0	0.282197	0	2.90664	1.70142	87.0865	77.2606	165.766	177.968
adap2	0	0	0.0465222	0	0.054957	0	0	0	0	0.0976805	0.602779	0.0706265	0.29565	0.117234	0.120557	0.100751	0.598615	0.433706
adar	10.5226	9.43117	10.9939	9.3158	11.2678	12.5957	10.5951	9.37298	11.7743	12.242	7.74527	7.57564	13.9981	12.7714	19.498	35.6291	24.0368	22.3821
adarb1	35.0626	35.1254	39.6127	40.4495	51.9976	54.5241	57.7729	56.0685	60.7809	63.8024	58.2139	59.5832	61.4445	61.6668	30.9981	34.315	10.605	10.7812
adarb2	0.182735	0.232348	0.528074	0.365123	0.597825	0.930213	1.08999	0.984031	0.90758	0.970176	0.969305	0.935296	1.99258	1.08122	0.769747	0.381209	0.03539	0.0256407
adat1	40.2918	39.6802	37.9015	41.9296	38.7318	39.4427	38.6099	36.8648	40.7994	41.2365	34.5845	35.3106	27.2699	23.3921	8.71427	8.34471	2.14097	1.46953
adat2	3.71754	2.32552	5.26622	4.19465	4.10587	5.53878	5.10888	6.21367	8.68882	9.65665	5.45867	5.27655	7.02807	4.64474	8.8704	7.98338	14.3994	20.3743
adck1	1.56925	1.71027	1.6196	1.85145	1.2755	0.723678	1.6715	1.7466	1.88715	1.7003	0.839395	0.983503	0.771947	0.748246	0.979301	0.818418	5.47047	6.41701
adck2	1.96546	1.70625	2.47287	2.30823	4.19925	3.62558	5.74225	4.44871	8.02282	9.87052	11.3644	9.97188	11.2339	9.54205	3.7047	3.34712	0.621467	0.315184
adck5	0.109247	0	0.263089	0.291049	0.0621576	0.217024	0.651646	0.250339	0.441431	0.405089	0.204527	0.319521	0.417984	0.662974	1.36352	1.02557	1.35409	1.16501
adcy1	0	0	0	0	0	0	0	0.0757033	0	0	0	0	0	0	0	0	0	0
adcy4	20.2933	19.2235	21.3228	21.6842	28.7559	26.7937	32.2574	32.2112	39.6289	39.691	67.0612	63.4948	55.7599	57.3038	16.9198	21.9704	1.61894	1.79029
adcy5	0.406638	0.199075	0.437789	0.458826	0.871012	1.18795	1.26034	1.24972	4.78429	5.07982	0.447817	0.629639	0.805363	0.609671	4.17965	4.94011	11.8964	11.3579
adcy6	4.46556	4.57534	5.9273	5.52953	8.36179	8.51701	10.9006	10.5691	19.2934	20.1555	26.6768	25.2016	18.8822	20.2293	0.928919	1.46515	4.3039	4.53028
adcy7	4.07001	4.56872	5.82843	5.72885	4.87905	5.81532	5.30116	6.28412	6.49321	6.77914	3.44991	3.72391	3.29761	3.53977	1.68422	1.99778	12.4769	13.6084
adcy8	2.47259	2.72902	1.53664	2.12494	2.35982	2.00701	1.40086	1.73024	1.21753	1.25472	0.0663665	0.116641	0.0406891	0.258152	0.0663669	0.332784	0.0411925	0.328291
adcy9	1.62451	1.94735	2.37627	1.79529	3.14944	2.92835	3.66866	3.06998	2.02596	1.79833	4.05512	3.72479	2.9159	4.67365	1.62707	1.67356	9.32201	10.6262
adcyap1	0	0	0	0	0	0	0	0	0.0233151	0	0	0	0	0.0420197	0	0	0.107279	0.194314
adcyap1r1	0	0	0	0	0	0.0401971	0.0201163	0	0	0	0	0	0	0	0	0	0	0
add1	79.6324	76.8244	96.9566	89.9495	114.511	123.778	134.054	130.592	147.947	150.05	198.643	192.759	189.681	186.633	170.721	178.952	138.446	124.906
add2	0	0	0	0	0	0	0	0	0.0376451	0	0	0	0	0.0678458	0	0	0.606253	0.878481
add3	60.7951	56.2191	56.5551	57.213	70.5324	85.414	90.2757	85.679	88.7337	85.8524	142.809	141.846	146.245	128.503	132.639	145.349	160.551	158.668
adgb	0.455728	0.272687	0.464817	0.399946	0.274546	0.452661	0.293157	0.393149	0.090267	0.126513	0.0669171	0.274419	0.12308	0.130147	0.167294	0.0559241	4.77644	4.60412
adgra1	0	0	0	0	0	0	0	0.028531	0.125774	0.0839412	0	0	0	0	0	0	0.14468	0.349409
adgra2	0	0.0917765	0.0573615	0.0423051	0	0	0.0197332	0.0363878	0.0267349	0.0267642	0.0743221	0.0870818	0.0607556	0.0240915	0	0	0.953362	0.868978
adgra3	97.6079	100.972	121.62	120.283	144.221	149.591	163.589	158.588	181.564	185.695	184.414	182.63	166.861	168.308	101.432	113.809	91.1454	88.2395
adgrb1	0.26053	0.24092	0.156852	0.294987	0.18529	0.145562	0.0809392	0.208952	0.186418	0.142712	0.121938	0.142873	0.07476	0.0790523	0.0406463	0.169844	0.201826	0.420401
adgrb2	0.0658935	0.142179	0.0846319	0.0702197	0.0999762	0.152717	0.131016	0.0402653	0	0.0444244	0.027414	0	0.0672298	0.133293	0.137071	0.0916418	0.510461	0.320526
adgrb3	0.498191	0.844604	0.559881	0.752108	0.472422	0.494839	0.371457	1.00842	0.167752	0.251905	0.647702	0.698188	0.571831	0.478691	0.0777248	0.129912	0.353775	0.535933
adgrd1	0.0610098	0.225671	0.0195898	0.0433436	0	0.0201998	0.0202176	0.0186405	0.0273912	0.0548425	0	0	0.062247	0.0246829	0	0	0.157543	0.0456569
adgrd2	0.410283	0.379401	0.428152	0.43722	0.116718	0.135841	0.203941	0.470082	0.276303	0.0922021	0.128019	0.249995	0.261627	0.165989	0	0.142651	0	0
adgre2	0	0	0	0	0	0	0.03884	0	0.0526212	0.052679	0	0.0571332	0.119583	0	2.09677	2.52658	9.56391	7.76247
adgre5	0	0	0.0430922	0.047672	0.203621	0.0888677	0.266839	0.246024	0.120506	0.150798	0	0	0	0	0	0	1.31689	1.65714
adgrf1	0.0915129	0.126937	0.198343	0.0487606	0.0520676	0.249967	0.136466	0.0838808	0.169479	0.0925449	0.0856632	0.133827	1.96074	1.55499	5.33971	6.82497	18.8929	19.5436
adgrf3	0	0.0435855	0	0	0	0.093632	0	0	0	0	0	0	0	0	0	0	0	0
adgrf4	0.0597776	0	0.172748	0.0637023	0.0680226	0	0	0	0	0	0	0	0.548908	0	0	0.249408	0	0.134204
adgrg1	6.84032	7.18107	7.83058	7.28942	5.86605	6.63018	5.12486	5.78521	2.13638	2.02734	2.18591	2.70616	1.51718	1.88504	1.11358	1.37873	2.71351	1.81761
adgrg2	0.176436	0.228418	0.339914	0.282029	0.200771	0.0876242	0.263105	0.38813	0.415869	0.761281	0.154147	0.0516031	0.432033	0.107071	0.440423	0.69933	0.464713	0.138638
adgrg4	0	0	0.0483095	0.160331	0	0.149441	0.0498575	0.0229842	0.0675479	0.0507165	0	0.0366699	0	0	0	0.104622	0.116552	0
adgrg6	0.130545	0.294252	0.243643	0.226063	0.408514	0.534873	0.162226	0.545936	2.20885	1.73272	0.468433	0.692033	1.26116	1.69337	0.794304	1.12338	0.214901	0.311398
adgrl1	0	0	0	0.0147236	0	0	0.0137356	0	0	0	0.0344887	0.121229	0	0	0	0	0.214065	0.186113
adgrl2	15.629	15.9542	18.4856	19.88	25.8687	27.3454	31.0934	29.6659	46.5374	46.1282	39.589	44.2539	32.7297	34.4446	13.4728	19.7473	67.8415	70.9632
adgrl3	1.36312	2.50276	1.16082	1.47366	1.52865	1.64828	1.63009	1.6478	1.21067	1.18537	1.43009	1.87783	1.9652	2.37375	1.60269	1.64849	0.520334	0.266111
adgrl4	0.0762923	0.0705498	0.183727	0.365856	0.130223	0.113668	0.303383	0.0699295	0.333961	0.411481	0	0	0.350277	0.0925971	0.428496	0	0.0591017	0.0856404
adgrv1	0.0466375	0.0924152	0.160446	0.141998	0.113722	0.0926473	0.0198705	0.0244274	0.00448682	0.017967	0.00831548	0.00974309	0.0101964	0	0	0.0416966	0.0722578	0.0299154
adh1	1.19245	1.15521	1.58625	1.21023	1.35693	1.69204	1.86289	2.02986	3.28868	5.20642	3.75619	3.40459	3.563	3.44595	1.70093	1.30304	0.0879775	0.892376
adh1a	6.6591	5.42865	5.57056	5.22885	5.38407	6.17914	4.87799	7.46904	5.48766	3.60338	15.5289	12.6852	11.8003	13.7186	10.6078	9.32211	2.17206	2.4589
adh1b	0	0	0	0	0	0	0	0	0	0	0	0	0	0	0	0	0	0
adh1c	0.0667903	0.123526	0	0	0	0	0.132799	0	0.0899591	0.0450289	0	0.293018	0	0.243193	0.166723	0.418	0.103481	0.149948
adh4	0	0	0	0	0	0	0	0	0	0	0	0	0	0	0	0	0	0
adh5	58.9797	48.9714	62.4309	63.0557	82.2346	81.2753	98.8329	92.3502	103.065	100.6	93.7757	84.1538	68.0269	66.7117	17.6576	12.7626	6.66468	5.15059
adh6	0.0997986	0.0922868	0	0.106351	0	0	0.0992145	0	0	0	0	0	0	0	0	0	0.618492	0
adh7	0	0	0	0	0	0	0	0	1.73793	2.01821	0	0	0	0	0	0	0	0
adhfe1	0.064555	0.059696	0	0	0	0	0	0	0.0869485	0	0	0	0.296389	0.0783514	1.20858	0.673352	21.704	26.3048
adi1	18.929	16.9006	22.74	19.2443	23.8919	20.0982	20.116	22.1366	21.3193	18.5557	25.3904	25.9313	24.9735	20.2016	13.5778	11.5742	4.04519	5.37314
adipoq	0	0	0	0	0	0	0	0	0	0	0	0	0	0	0	0	0	0.244234
adipor1	24.703	25.6163	24.321	26.3611	33.4609	31.1363	34.2802	32.668	28.4534	27.3821	21.9438	23.3692	27.7938	27.0462	30.1942	34.0478	40.8603	43.335
adipor2	14.1037	12.4735	10.5873	12.163	17.5796	16.1845	18.7586	15.2875	24.5086	21.8929	29.1143	29.4482	24.9958	20.9892	10.5522	12.8271	37.2727	32.2245
adk	305.827	308.197	298.83	301.403	325.101	318.555	302.548	316.571	359.681	364.669	229.584	236.121	242.259	263.899	169.893	194.355	81.2769	90.7004
adm	0	0	0	0	0	0	0	0	0	0	0	0	0	0	0.480074	0.160482	0	0.172708
adm2	1.52046	0.937344	0.48821	0.540095	0.288363	0.377557	0.629818	0.232276	0.76796	0.68338	0.474423	0.370581	0.387823	0.461352	2.37213	1.32162	0.392621	0.426691
admp	0	0	0	0	0	0	0	0	0.0785164	0	14.7698	18.5842	66.1976	72.1681	60.2437	56.4272	49.585	63.3434
admp2	1.825	2.08734	1.66546	1.02359	1.25697	1.95583	1.38462	2.64126	0	0.161893	1.55849	2.59861	1.98451	2.27333	42.4991	45.5863	56.2538	57.6849
adnp	35.9749	33.7093	45.1301	45.7604	71.32	70.8046	83.8911	78.548	123.656	124.843	146.225	147.639	159.855	166.248	133.093	157.558	124.524	129.342
adnp2	116.404	124.972	113.445	114.297	124.147	121.08	112.702	113.799	105.679	112.055	127.305	126.746	120.471	123.549	105.449	109.525	84.9393	89.2827
ado	116.058	112.596	124.13	118.285	134.344	141.762	150.072	134.8	185.592	194.581	235.168	236.218	172.647	167.311	68.0667	84.3024	46.0509	45.8287
adora1	12.4341	12.7177	11.796	14.9569	20.2589	19.1806	24.8163	20.8947	23.3448	23.6244	22.338	18.7344	15.137	14.8628	2.82166	2.94763	0.875671	0.317219
adora2a	0.0632285	0.175408	0	0	0	0.125606	0.125717	0	0	0	0.394579	0.739712	5.32214	5.75561	7.41813	6.99087	3.13482	3.61977
adora2b	0.0824229	0.076219	0.317585	0.61484	0.750331	0.409341	0.983287	0.831037	1.16565	0.611251	0.308617	0.482134	0.378425	0.100038	0.102873	0	0.255404	0.925222
adora3.1	0	0	0	0	0	0	0	0	0	0	0	0	0	0	0	0	0	0
adora3.2	0	0	0	0	0	0	0	0	0	0	0	0	0	0	0	0	0	0
adora3.3	0	0	0	0	0	0	0	0	0	0	0	0	0	0	0	0	0	0
adpgk	0	0	0	0	0	0	0	0	0	0	0	0	0	0	0	0	0	0
adpgkl	26.6269	35.7251	30.2753	31.2183	36.918	31.6948	32.0942	29.982	31.3716	32.7731	44.888	45.9616	35.9321	33.1594	9.59038	15.5844	13.8066	11.4407
adprh	7.11886	8.29569	7.52648	6.78445	9.22037	10.1178	9.20611	7.48005	0.272838	0.429217	8.52389	10.4105	7.52895	8.92125	4.40645	6.03695	0	0.0649686
adprhl1	0	0	0.0449516	0.0248645	0	0	0	0	0	0.0157305	0	0	0	0	0	0	0	0
adprhl2	44.1808	42.0644	43.2877	44.6614	49.6481	47.1645	53.7056	52.7963	44.0275	42.22	43.0315	45.2867	41.2852	42.9317	23.7061	30.0045	5.97085	4.55773
adprm	2.22826	2.71617	2.5367	3.34597	2.42035	3.72231	6.1422	7.24132	8.11694	6.35046	7.33199	7.85017	11.9356	7.49877	7.20562	7.39526	1.8831	3.18346
adprm.2	0.0791422	0.0731852	0.152472	0	0.0900582	0	0	0	0.0532979	0	0	0.462943	0	0.192112	0	0	0	0.444197
adra1a	0	0	0	0	0	0	0	0	0	0.0888487	0	0.192723	0	0.213269	0	0.0916418	1.02092	0.838298
adra1b	0.158058	0.097441	0.406012	0.168436	0	0	0.104756	0.144876	0.177406	0.0355202	0.526062	0.385235	0.241896	0.575514	0.197275	0.329731	0	0
adra1d	0	0	0	0	0	0	0	0	0	0	0	0	0	0	0	0	1.67387	1.81912
adra2a	0	0	0	0	0	0	0	0	0.0522422	0.0522995	0.193642	0.34033	0.593607	0.376614	3.00147	1.78014	3.12494	2.52531
adra2b	0	0	0	0	0	0	0	0	0	0	0.0638195	0	0	0	0	0.0533353	0	0
adra2c	0	0	0	0	0	0	0	0	0	0	0	0	0.0929901	0	0.0758368	0.126756	0.941404	0.750269
adrb1	1.24433	0.912604	1.7773	1.41748	3.02723	2.59978	2.98599	2.3991	2.16722	2.05388	3.37388	4.07861	2.49536	3.02054	0.481986	0.626584	0.332398	0.144497
adrb2	6.01582	5.74969	4.20034	3.91531	6.61586	4.1707	7.58615	6.62432	7.69479	8.38374	9.37285	10.0963	8.83598	9.80066	10.3808	14.8239	6.63077	7.02487
adrm1	22.6669	14.2674	18.807	19.5879	28.3943	28.947	41.2811	37.45	76.0037	71.0789	44.4566	39.6935	83.5178	64.8476	106.863	95.3669	78.2059	87.9857
adsl	41.6411	38.2111	44.4235	37.8167	45.0199	48.6645	44.5757	48.7908	49.9498	52.7528	30.2258	34.1292	36.0841	36.2804	38.0069	32.68	23.1566	21.2633
adss2	118.621	108.984	115.325	119.171	134.111	133.168	146.742	135.559	147.657	152.044	139.036	134.368	118.074	128.297	94.1442	98.285	55.2837	60.4568
adssl1	0	0	0	0	0	0	0	0	0	0	0	0	1.2308	0.683271	0.100376	0.335545	0.373808	0.0902768
adtrp	0	0	0.0843452	0	0	0	0	0.240774	0	0	0	0	0	0	0	0	0	0
aebp1	0	0	0	0	0	0	0	0	0	0	0	0	0	0	0	0	0.218838	0.475655
aebp2	11.3196	7.74764	9.78776	7.21865	18.7635	19.0341	23.2155	22.5484	29.8321	32.0882	23.9175	24.6347	26.7357	25.7466	16.5755	52.9923	32.0379	25.0129
aen	9.40876	8.17059	12.0077	11.3498	20.163	22.5809	33.1415	33.0954	58.9242	59.4719	48.1646	45.957	58.4745	56.2863	20.029	18.8309	13.6155	15.065
afap1	5.95929	6.78245	4.84209	5.52514	4.92855	5.11845	4.90297	4.99864	3.77906	3.94306	2.91988	2.51965	1.57245	2.28306	0.21702	0.39571	4.35936	4.70216
afap1l1	0.232236	0.134222	0.111854	0.247483	0.363368	0.403677	0.230877	0.266084	2.77606	3.36625	0.83333	0.509425	0.355418	0.493269	0.9058	0.423915	28.2454	26.6883
afap1l2	0.0289839	0.0268023	0.139598	0.0617736	0.0329816	0	0.0576285	0.0265666	0.019519	0.039081	0.180874	0.0847708	0.0443575	0	0	0	0.179625	0.357888
afdn	139.038	152.735	138.519	137.285	131.67	131.87	116.725	111.984	125.147	128.61	111.548	111.367	99.1054	98.6892	34.1791	45.975	59.3146	62.8889
aff1	4.88686	4.94852	4.74631	5.46593	8.31836	7.20072	8.9135	8.07013	12.0082	12.9607	22.6581	22.8863	17.5539	16.6173	3.52854	6.44537	0.93861	1.38274
aff2	0.0640523	0.0507695	0.0617003	0.0682576	0.0208248	0.0817987	0.209226	0.0587103	0.117082	0.006169	0.0342616	0.0133812	0	0.0222118	0.0114206	0.0572664	0.0141771	0.041086
aff3	0.253863	0.448168	0.600236	0.368904	0.446447	0.527232	0.550641	0.676918	0.543971	0.326741	0.144021	0.472491	0.247237	0.168064	0	0	0	0.0259062
aff4	86.1354	91.4565	95.0374	89.3056	114.156	117.409	113.713	111.387	124.255	122.123	78.8516	88.8734	72.81	69.9099	23.0735	47.5429	28.1583	30.7906
afg1l	12.9027	14.3374	13.861	17.4277	22.4767	23.6803	26.235	29.1528	32.3612	34.7593	19.7488	20.4992	19.3402	21.3314	10.8685	12.1845	9.87198	10.6094
afg3l1p	1.37814	1.10449	1.68155	1.14226	2.30007	1.97725	2.61837	2.30184	4.35177	4.79014	2.14052	2.59758	2.39035	2.97364	1.79652	2.04444	3.46381	3.54093
afg3l2	18.2588	16.6316	20.9538	20.7525	32.2547	32.3489	44.6096	43.636	74.3914	73.326	61.6549	62.7767	41.4736	43.695	13.3852	14.1333	7.76659	9.85581
afmid	0	0.327878	0.0853865	0.283383	0	0.17609	0	0	0	0.119521	0.110634	0.129627	0	0.107585	0.110634	0.369836	0.686683	0.796021
aftph	36.4459	40.9753	37.5559	36.8202	38.5534	37.4629	35.8274	36.8349	33.2479	34.2543	35.1337	36.5019	29.907	34.6022	17.4772	18.4575	31.4658	34.2366
ag1	0.257962	0.298182	0.24849	0.481073	0.220157	0.448396	0.705245	0.29556	0.564601	0.30435	0.241473	0.188619	2.96093	1.72201	306.109	285.62	698.63	771.778
aga	5.9518	6.65699	6.55229	6.16135	7.67576	6.64368	8.39647	8.1052	18.8195	17.3116	22.7806	21.4693	20.2995	18.5067	9.76319	8.041	3.95204	5.02672
agap1	62.138	66.6271	66.609	63.6478	64.6301	66.3293	60.8405	59.0632	56.2076	57.6588	70.3976	66.3477	56.8179	55.0659	6.92956	9.85665	18.8116	18.3035
agap2	0.0583578	0.0323791	0.0899438	0.0870649	0.066407	0.046372	0.104429	0.139076	0.0235804	0.0786878	0.0582692	0	0.0714495	0.0424978	0.0291348	0.0730453	0.506333	0.327542
agap3	0.548786	0.507479	0.384462	0.478486	0.908334	0.891971	0.86796	0.891713	2.18387	1.98445	2.05483	2.4076	3.20679	1.96793	1.02742	4.83956	5.44941	4.50821
agbl1	0	0	0.0171479	0.0569109	0.0405138	0	0.0353947	0.0163169	0	0.0120015	0.0222181	0	0	0	0	0	0.0551616	0
agbl2	2.38968	2.02818	3.72093	3.8373	3.6133	4.51959	5.10937	4.77083	6.32704	6.09123	9.07027	8.66473	7.91561	9.97258	9.84662	10.6533	11.2595	10.1053
agbl3	19.3324	15.3526	16.2414	15.923	17.3388	19.0923	20.5396	21.3385	26.0883	24.1768	33.1541	30.6991	28.0057	26.2403	17.6362	17.4712	9.60313	10.3536
agbl4	1.14879	1.59349	0.622467	1.07119	0.653622	1.56896	0.856552	0.789737	1.25718	1.21015	1.16497	0.839985	0.32965	0.522865	0.627296	0.149783	0	0.241791
agbl5	67.5896	74.0333	64.7501	68.3734	60.5108	58.4799	51.9098	52.0042	45.6355	44.7581	41.0755	39.345	39.4042	38.539	29.8733	35.3983	12.7559	13.1396
agfg1	75.8817	73.1325	81.2438	84.3841	91.9298	95.2082	100.318	99.4665	112.047	114.094	130.193	134.537	141.64	136.204	100.706	83.7441	17.6041	16.3504
aggf1	22.2024	22.7162	27.9623	26.8974	34.483	34.6068	38.5896	37.1951	34.6273	34.3113	53.5027	54.3516	52.2312	49.9347	22.7961	26.4446	18.478	18.9448
agk	10.758	10.6114	12.7119	13.2221	21.464	21.7986	26.5236	25.1121	38.2531	41.1962	33.0306	36.1841	48.5145	45.2647	39.9234	39.9478	13.7788	12.3177
agl	13.1844	12.6518	11.9532	12.1004	13.0116	13.234	13.6608	10.8636	11.5976	13.0314	19.0616	18.1174	16.7691	13.9989	11.0697	10.8275	3.29671	3.86182
agmat	0	0	0	0	0	0	0	0	0.110171	0.220585	0	0.239236	0	0.0992782	0.204183	0	0.126732	0.0918195
agmo	0	0	0	0	0	0	0	0	0	0	0	0	0	0	0	0	0.109659	0.0794495
ago1	61.6289	75.5684	70.4473	71.2866	79.5245	77.069	79.1982	78.9905	77.719	80.0556	71.1028	74.4288	53.0416	57.4973	7.55687	11.5208	11.7117	12.1514
ago2	2.8634	3.84572	4.40007	4.26226	5.45643	5.84626	5.10588	5.51997	4.75963	4.39715	8.93453	9.4382	10.5381	9.571	39.8795	62.5313	61.0886	63.4431
ago3	9.21886	8.72745	12.6139	12.0176	15.2497	13.3981	13.9759	12.5646	14.7763	14.2463	7.18788	7.33314	5.39549	6.2191	7.65255	10.1412	2.78201	2.58097
ago4	62.7108	59.3743	52.0371	52.6611	57.848	59.8689	47.1631	49.0406	54.6474	52.5217	25.619	25.2482	26.3642	30.2683	18.8672	42.0603	22.5292	22.137
agpat1	12.5387	12.8384	13.7587	12.7809	15.0539	16.2086	17.3791	17.356	24.5491	23.841	22.5898	22.4819	21.6924	21.3939	10.6599	11.9035	4.95524	4.77327
agpat2	0.707414	0.402565	0.419346	0.579892	0.866909	0.918855	1.83933	2.49391	2.78513	3.19175	3.39587	2.54648	1.2492	0.726507	0.135836	0.11352	0.337241	0.366505
agpat3	54.0679	51.3277	55.4953	51.2157	67.193	73.4414	84.328	74.6438	103.184	106.447	134.708	134.408	149.305	117.785	65.8165	72.9458	35.481	36.0237
agpat4	10.879	8.92553	15.6799	14.2954	19.2674	18.1992	19.2724	20.6931	30.1319	32.8671	14.599	17.1054	24.6612	25.8123	22.0518	18.7703	4.68909	4.77461
agpat5	81.3408	88.8521	92.7639	98.6372	94.6061	101.867	98.8824	102.639	110.138	112.49	74.8622	83.6128	72.7541	84.5837	33.392	36.4581	2.11714	4.52097
agps	4.3739	4.53707	5.71542	5.43115	11.6856	13.5245	20.4181	19.4878	47.9745	49.5913	52.6919	58.0116	72.5269	76.9064	74.7186	74.0277	11.2552	12.5521
agr2	0	0.142785	0.892426	0.493635	0	0.766842	0	0	0.41594	0.728694	1.34902	0.451605	0.945233	0.562221	14.4538	12.5625	255.021	295.869
agr3	0	0	0	0	0	0	0	0	0	0	0	0	0.156727	0.745766	0.511267	0.427274	1.58666	1.03461
agrn	6.81559	9.33944	10.9208	10.6917	7.33321	9.19964	7.99646	10.3131	9.55806	10.2231	24.1415	24.11	26.1205	27.1619	16.3835	19.7784	32.9328	31.9812
agrp	1.24388	1.61036	1.31803	3.04876	1.13236	0.741306	0.49464	1.14014	0.502611	0.670884	0.620996	1.09141	0.761463	0.90583	1.08675	1.29745	0	0
agt	0	0	0	0	0.0753407	0	0	0	0	0	0	0.193644	0	0	0	0	0	0.0743211
agtpbp1	3.48558	3.36336	3.2116	3.61752	4.48369	5.84045	5.2731	4.72287	6.59297	6.35501	5.97702	7.84531	7.37538	7.43096	5.25829	7.01846	1.45575	1.3269
agtr1	0	0	0	0	0	0	0	0	0.0396426	0	0	0	0.0450444	0	0.0734706	0.491205	0.0456016	0.0330391
agtr2	0	0	0	0	0	0	0	0	0	0	0	0	0	0	0	0	0	0
agtrap	27.3106	26.1903	23.4596	24.4604	21.4267	23.108	24.3661	21.9662	21.5362	20.5631	17.1889	17.6366	14.1704	15.1099	3.59318	3.89563	0.723311	0.873419
agxt	0	0	0	0	0	0	0.0765234	0	0	0	0	0.112565	0	0.186849	0	0.642311	0	0
agxt2	0	0	0	0	0	0	0	0.126493	0.0464685	0	0	0	0	0	0	0	0	0
ahctf1	113.348	112.745	94.4751	92.1686	110.737	112.691	116.119	118.883	120.597	126.235	83.2058	90.7028	62.4414	63.5179	20.9177	25.3533	36.7535	37.5067
ahcy	7.58055	5.98412	6.11484	7.55283	9.95862	11.2025	15.1949	14.744	45.4892	47.2427	53.6141	56.1492	113.185	111.305	241.073	237.982	87.7528	87.7229
ahcyl1	54.7747	60.4889	54.8	58.5821	56.9162	52.2403	45.5864	48.8741	25.3631	24.1882	49.7271	48.6985	38.2232	41.1395	23.9153	27.7053	2.25215	1.85423
ahcyl2	140.956	147.322	147.54	149.257	169.532	166.458	163.138	168.796	179.1	178.076	163.369	168.233	160.114	162.396	105.685	115.82	48.8813	44.5766
ahdc1	3.10309	2.5217	3.13408	3.04629	5.15755	5.23042	6.50641	6.5505	13.6151	15.253	17.1585	15.3188	19.4854	18.7172	17.9567	24.7953	76.2834	72.833
ahi1	79.553	92.7072	67.5102	67.9968	46.6411	46.809	36.8345	37.0647	31.051	30.7881	29.9932	33.492	18.3677	20.5471	11.1659	11.1404	19.5759	18.6326
ahnak	8.63736	8.41002	7.43342	7.4531	10.4122	9.2911	11.0806	8.6702	19.485	19.3231	19.8719	19.4165	20.4522	19.5643	87.0528	141.546	395.122	431.694
ahnak2	0	0	0	0	0	0	0	0	0	0	0.00639764	0.007496	0.00784476	0.0124428	0	0	0.079418	0.120833
ahr	1.53028	2.22985	1.62299	1.81194	1.4951	1.67352	1.42912	1.43099	1.32203	1.24011	1.0032	0.949391	0.331188	0.469021	3.20256	3.93403	5.36455	6.33325
ahrr	0	0	0.154267	0	0.0455592	0	0.0796052	0.0366978	0.0269626	0	0.0999404	0.0585491	0.0612732	0	0.199882	0.0835223	0	0
ahsa1	41.5924	33.8198	38.223	33.8792	54.9454	52.8673	67.806	63.4663	75.1231	77.5692	52.7071	46.2587	50.6059	49.8044	64.144	58.1773	63.3301	62.6988
ahsg	0	0	0	0	0	0	0	0.301426	0	0	0	0	0	0	0	0.228677	0.339672	0.369147
aicda	0	0	0	0	0	0	0	0	0	0	0	0	0.193532	0.0767415	1.57832	1.58284	0	0
aida	59.9036	54.8236	62.409	64.1955	70.0188	65.2442	71.2181	66.8978	64.4259	63.0583	66.4975	70.0322	69.3382	68.8901	61.3827	58.2086	41.4043	46.3836
aif1l	0	0.0826497	0	0.095245	0.203409	0	0.266562	0	0.120381	0	0	0.130703	0.136784	0	0.223105	0.186452	0	0.100328
aifm1	46.6871	44.3333	55.9012	51.9809	67.6427	71.2471	85.1874	76.0506	96.1544	91.8541	93.9634	94.8805	67.6902	65.612	24.4698	23.7763	24.3816	25.2942
aifm2	12.3099	10.1706	10.5946	11.5617	16.5177	15.1876	18.5494	16.2282	15.1549	14.4281	19.3817	21.9246	20.4815	19.8607	13.1321	11.8141	6.14195	5.25294
aifm3	0.127917	0.276008	0.410734	0.863333	0.630764	0.804691	0.890181	1.05524	1.83777	2.32848	0.478962	0.561191	0.717812	0.724524	0.798275	0.444754	45.7816	51.0705
aig1	0	0	0	0	0	0	0	0	0	0	0	0	0.118544	0.0470062	0.0483383	0.0807942	0	0
aimp1	15.5546	9.75012	14.9835	13.0159	23.5209	21.2566	31.3423	29.2802	44.6426	47.0845	43.2576	43.0509	60.2317	60.5645	88.3398	86.8937	83.2972	73.8264
aimp2	162.095	145.255	174.696	172.306	174.507	177.241	191.638	195.16	190.366	189.702	191.807	188.05	184.538	177.584	153.325	134.045	80.4959	76.2165
aip	21.3809	25.2841	21.438	25.4951	30.842	22.1054	24.5745	21.6376	29.1724	30.4369	38.0939	41.3793	40.2635	40.8066	33.9276	35.9812	21.6738	23.5546
aipl1	0	0	0.0341265	0	0	0	0.0352201	0.0649455	0.190867	0.286615	0.663256	0.414466	0.162656	0.214994	0.309521	0.147813	0.109779	0.357915
aire	0.247941	0.0573196	0.0597091	0.13211	0.0705348	0.0615681	0	0	0.0834872	0.125368	0	0	0	0.30093	0	0	0.192074	0.139161
ajap1	0	0	0	0	0	0	0	0	0	0	0	0	0	0.0424289	0.0872625	0.0729267	0.324972	0.235447
ajm1	0	0	0	0	0	0	0	0	0	0	0	0	0	0	0	0.0716667	0	0.0385632
ak1	0	0	0.0728671	0	0	0	0	0	0	0.0509985	0.0472063	0.110621	0.173652	0.0918113	0.14162	0	1.5236	1.40107
ak2	91.1887	86.9793	92.6612	90.3521	91.2875	90.2826	97.9718	99.9764	134.816	136.105	132.001	125.065	170.645	167.132	213.022	181.941	136.836	127.477
ak3	93.1036	93.1894	88.4095	91.3321	82.1065	83.6587	75.4096	76.8441	89.8676	90.1238	69.0122	71.977	64.4203	67.2525	43.6918	51.0951	66.8461	70.7671
ak4	4.76934	5.79711	8.9516	9.14319	5.84679	5.64073	4.64366	7.41365	17.0693	15.5964	11.3836	10.2462	4.74064	3.96848	0.490941	0.769289	0.533254	0.441544
ak5	0	0.0268988	0	0.0619961	0.0662008	0	0.0867541	0.106649	0.137125	0.0588325	0.0726103	0	0.0890344	0.282439	0.108916	0.060682	1.08163	2.28567
ak6	17.8958	17.4489	18.9697	17.6345	22.9203	24.6921	27.766	30.6103	24.6584	24.0797	18.3172	20.8049	17.8767	19.721	31.775	27.6483	54.8737	53.2894
ak7	0	0.0942891	0.0982197	0.217316	0.0580138	0.0506388	0.152051	0.09346	0.068667	0.0687424	0.254523	0.223665	0	0.24751	0.509049	0.21271	11.4534	12.7048
ak8	4.94658	3.70297	5.82381	4.09993	6.43298	6.55105	7.41547	5.32569	12.6905	11.0634	19.5995	12.9749	23.9126	21.9184	18.7176	18.0177	18.1259	14.8072
ak9	0.706723	0.463794	0.966257	1.45766	1.71217	1.76624	2.0851	2.38217	3.60792	2.78192	3.38598	3.03381	3.48897	4.03978	3.38601	4.56563	7.41748	6.55127
akain1	0	0	0	0.130979	0	0	0.12219	0.168988	0.0827726	0.165727	0.153403	0.17974	4.23231	3.72942	29.7605	28.8456	0.0952148	0.482893
akap1	138.536	135.2	131.057	128.376	149.451	148.481	163.421	153.101	151.927	154.697	158.79	169.431	121.123	126.157	66.7599	77.4014	52.5701	54.5618
akap10	54.8009	59.4305	65.7642	65.5473	80.7657	79.9018	85.7538	84.767	109.04	110.364	94.6959	97.9	68.3447	66.5455	10.263	13.2604	25.1867	23.9868
akap11	5.51173	5.00552	6.22277	5.95781	8.29517	9.10477	9.68237	9.28925	11.3351	12.0135	11.2188	11.6714	5.95607	7.86456	1.62735	2.26667	2.41802	2.28412
akap12	0.1281	0	0.123397	0.0758394	0.0971795	0.0141376	0.0566004	0.039139	0.0670978	0.0191919	0.604001	0.395477	9.01818	9.48413	159.83	186.946	241.717	264.762
akap13	5.00026	4.71731	5.64376	5.66226	8.40273	9.08038	10.1629	9.09241	23.1704	23.9655	23.0974	24.4186	16.4645	17.7285	3.29065	6.55376	20.4556	19.4809
akap14	0	0	0	0	0	0	0	0	0	0	0	0	0	0	0	0	3.60004	2.96805
akap17a	69.2589	71.5536	100.233	101.174	147.379	163.589	192.999	199.864	220.229	215.854	178.813	178.174	142.003	147.341	61.6956	55.4199	52.3696	58.0299
akap6	0.936516	1.18677	1.22511	1.26906	1.40776	1.82597	1.50575	1.73802	3.16903	3.53107	4.0261	4.41296	3.14963	3.83098	0.317472	0.482394	0.250788	0.233615
akap7	42.9874	43.5476	43.4951	44.8167	56.1094	57.5811	63.1148	64.9548	67.7866	71.2736	57.4558	57.3398	53.1474	60.7021	27.5337	26.6878	3.97976	5.54066
akap7.2	2.02569	3.12203	3.51236	4.02955	3.07346	3.35343	4.5647	6.06538	5.63866	3.45975	2.35972	3.55479	4.5469	3.44206	3.2025	1.1269	0	0.151593
akap8	273.686	279.667	287.462	279.367	238.79	222.765	225.343	206.387	180.636	180.609	249.604	241.378	239.224	223.525	212.755	197.327	96.4071	102.24
akap8l	50.2381	52.9808	56.683	54.6105	71.9886	68.3816	80.928	73.9046	73.2518	76.6251	75.088	78.2289	75.8175	85.0636	69.8633	75.3679	21.7414	25.0639
akap9	60.3384	73.8796	58.7402	59.8039	59.7775	59.3622	52.7094	48.0805	39.5651	41.2016	48.1678	49.1343	34.495	34.7996	6.79417	12.1344	8.73043	7.78586
akip1	63.4427	60.5472	61.4223	63.1616	59.1669	52.1766	52.01	49.9143	54.8294	56.8371	77.4472	68.0575	56.488	53.4985	5.60828	4.24056	0.331518	0.72057
akirin1	753.012	747.484	743.662	722.57	711.427	703.079	694.385	687.901	639.971	630.872	471.088	487.422	474.399	501.715	441.33	441.756	227.369	253.736
akirin2	530.182	500.29	555.603	548.721	518.768	530.494	515.431	517.777	472.06	462.285	488.343	502.996	490.4	515.611	567.78	524.221	316.996	324.625
akna	22.6807	22.9582	20.9165	20.4402	20.1763	20.3578	19.8952	19.3535	5.09139	6.17895	7.89143	6.72968	5.20811	5.18641	1.30318	1.81515	20.1016	17.5375
aknad1	0.0330366	0.0305499	0	0.0352056	0.0375933	0.0328143	0	0	0.111242	0.0222728	0.0412331	0.048312	0.252799	0.280679	3.54607	3.58377	0.460667	0.222507
akr1a1	11.9581	11.9086	14.9894	16.0107	22.1557	21.471	27.6627	25.2238	35.5679	32.2478	46.0185	44.1664	43.4059	47.1695	42.0962	39.658	21.4963	23.6629
akr1b1	12.9717	11.4802	13.032	11.1943	14.9419	13.1215	19.1458	13.4946	22.134	22.9094	31.3867	30.4908	42.9925	42.6921	44.8952	42.5001	45.4971	38.77
akr1c1	0	0	0	0	0	0	0	0	0	0	0	0	0	0	0.129458	0	0	0
akr1c2	0	0	0	0	0	0	0	0	0	0	0	0	0.174881	0	0.142621	0	0.708176	0.641356
akr1c3	0	0	0	0	0	0	0	0	0	0	0.125333	0	0	0	0	0	5.60103	5.52344
akr1c4	2.74199	1.94396	1.49674	1.26621	2.08013	1.54334	3.99805	3.51863	1.23105	0.369721	7.07273	4.94545	9.79158	9.87305	11.2936	6.1015	0.991271	1.02599
akr1c8p	0	0	0	0	0	0	0	0	0.300744	0.180645	0	0	0	0	0.222951	0	0.830283	0.601554
akr1d1	0.177893	0.493509	0.685442	0.568717	0.101215	0.530087	0.176852	0.244585	0.179701	0.179899	0.111014	0.130073	0.27225	0	0.22203	0	0	0
akr7a2	0.300091	0	0.578143	0.639586	0.341482	0.794857	0.795559	0.275063	0.673649	0.741827	0.998785	2.04795	1.53088	1.21408	1.99758	2.08677	10.5388	9.76897
akt1	18.2368	16.606	14.6393	14.4103	18.564	19.5619	21.6759	18.5637	16.4797	17.7942	33.6001	33.7445	22.7361	20.0262	2.36131	6.21132	9.13006	8.35564
akt1s1	2288.13	2368.91	2369.19	2313.75	1916.83	1926.16	1860.36	1845.17	1504.05	1518.71	1746.48	1696.39	1714.18	1626.2	1642.99	1514.08	588.589	580.768
akt2	9.01223	8.05017	10.159	9.93086	13.7028	18.0936	20.0159	21.1964	58.5229	60.4488	39.7276	38.5845	79.2921	87.6458	106.404	124.325	98.8706	104.523
aktip	236.15	235.662	255.021	248.953	275.577	277.16	278.166	290.125	284.032	281.25	265.08	279.404	181.326	188.255	11.0998	13.665	17.6309	26.6212
alad	1.06151	1.39062	1.27817	0.848404	1.61057	2.28447	2.63825	2.51354	7.56571	5.36741	2.98097	5.04508	9.88273	6.54923	36.5448	36.1695	25.9033	20.5547
alas1	16.0287	15.8653	17.9563	18.2831	22.2928	23.0558	25.1418	26.9896	36.9411	36.5414	38.381	39.7613	36.5235	32.64	15.7822	12.8799	74.4104	84.8991
alas2	0	0	0.0468902	0	0	0	0	0	0	0	0.121509	0	0	0	0.364531	0	0.377094	0.601063
alb	0.0649769	0	0	0	0.221817	0	0	0	0	0	0.0810979	0	0	0	0	0	0	0
alcam	0	0	0	0.0284437	0.0607455	0.079535	0.0530701	0.0244652	0.0539253	0.0899742	0.133254	0.195164	5.55544	4.72976	47.8051	56.6838	284.806	311.812
aldh16a1	11.0678	9.98594	12.0681	12.6135	18.0606	18.971	26.1703	21.3462	32.635	35.469	45.4701	48.1062	43.0515	44.3572	14.1975	15.4727	2.56027	2.41576
aldh18a1	132.888	130.64	119.807	120.603	122.518	119.722	109.01	111.508	85.1818	85.599	89.1205	88.5541	78.3714	75.5552	13.6618	14.3552	33.1744	33.9873
aldh1a1	0	0	0	0	0	0	0	0	0	0	0	0	0	0	0	0	0.747989	0.108386
aldh1a2	164.464	166.439	185.556	189.745	206.85	216.658	202.43	211.748	212.409	215.105	209.914	220.992	195.156	204.642	272.114	331.884	154.639	166.875
aldh1a3	0	0	0.0305431	0	0	0	0	0	0	0	0	0	0	0	1.10808	0.926041	1.27727	1.92199
aldh1b1	0	0	0	0	0	0	0	0	0	0	0	0	0	0	0	0	0.339845	0.787915
aldh1l1	0	0	0	0	0	0	0	0	0	0	0.0467547	0	0.0573304	0.500132	52.7397	58.6109	211.845	223.373
aldh1l2	0.572749	0.218086	0.421902	0.430837	0.8051	0.970468	1.13879	1.60583	1.38404	1.36284	3.32195	3.00542	2.88744	3.06686	2.27071	2.60051	0.78299	1.02112
aldh2	49.1849	50.3058	52.2277	54.1591	68.7361	70.299	92.0663	87.9977	159	157.171	116.796	117.336	67.6625	67.0573	12.7167	15.0557	8.17484	7.14822
aldh3a2	121.605	123.524	122.642	130.525	142.502	138.844	141.369	148.818	129.018	134.27	129.427	137.671	121.885	131.994	118.871	109.769	46.0383	47.3512
aldh3b1	190.463	168.523	162.618	164.975	155.336	148.025	129.854	128.43	138.914	138.279	153.159	147.877	118.788	121.895	27.149	29.3295	0.739791	1.25065
aldh3b2	0	0	0	0	0	0	0	0.0591416	0.0434525	0	0.0805311	0.0943567	0.0987469	0.469874	0.161063	0.134603	0.499842	0.57943
aldh4a1	1.18791	1.42305	1.40436	1.06451	1.8433	2.44028	2.52296	2.62311	6.94538	6.51617	4.75117	4.50086	3.71863	3.67	3.50443	3.60456	4.68488	5.00049
aldh5a1	1.02655	1.27662	0.920658	1.24484	0.402807	0.773522	0.91497	0.713814	0.381421	0.572759	1.01616	0.828251	0.379219	0.601488	0.795258	0.221537	10.4204	11.2055
aldh6a1	204.04	199.267	168.041	166.506	169.875	150.114	153.655	137.898	106.077	112.915	191.26	187.762	166.224	158.396	110.543	105.533	57.2922	60.8722
aldh7a1	163.975	155.939	151.099	153.785	173.931	164.477	172.211	167.908	184.395	170.817	133.935	138.957	82.759	75.839	14.9356	13.6289	1.6035	1.67003
aldh8a1	0	0	0.0751319	0	0.177508	0	0	0	0	0.0525836	0	0	0	0	0	0	0	0
aldh9a1	3.22158	2.87979	4.03427	4.06249	5.3767	6.02648	7.25952	5.21679	14.3914	12.3801	6.76846	6.98824	5.99861	8.92803	11.2585	10.641	15.6396	14.9475
aldoa	44.4999	34.5839	51.5954	53.4754	84.191	88.6024	131.239	127.139	178.079	172.529	240.985	217.084	257.82	256.59	287.58	261.568	224.336	203.682
aldob	118.998	109.461	111.272	109.585	107.425	98.751	113.037	110.989	91.2112	87.6947	115.304	119.715	106.519	108.237	104.696	83.7172	134.175	135.69
aldoc	191.049	165.058	199.47	190.729	192.219	177.843	199.931	214.857	176.921	184.084	211.608	200.562	226.774	211.672	235.68	226.774	179.708	150.915
alg1	6.55878	6.64273	8.60443	7.52192	12.2969	9.98911	12.7924	11.68	11.9889	11.581	12.396	11.6924	13.6704	11.5996	9.51145	10.1641	3.19372	2.52426
alg10	21.7137	23.2234	19.651	20.0102	22.4225	23.3329	24.6211	22.7359	20.5815	19.3277	16.6849	17.9109	20.3999	19.6016	10.175	12.0901	4.25017	5.50807
alg11	41.3243	39.8753	43.2087	44.4996	44.4156	42.5231	45.0244	43.6135	39.7626	42.3124	43.767	43.3079	34.1344	36.5454	6.41817	8.53033	17.3743	18.4299
alg12	12.9767	11.3721	11.7735	12.7031	12.9637	14.538	13.7258	13.2084	14.2773	14.5981	8.56897	9.92977	6.81238	8.14974	3.48411	1.88869	4.6757	4.57329
alg13	53.3211	50.501	48.8241	51.4966	56.6139	57.5712	53.7734	48.698	66.6218	63.9738	42.1508	41.2765	26.5569	26.2266	4.07803	5.49874	2.12701	1.57188
alg13l	273.169	263.24	246.321	235.288	234.044	218.884	222.887	222.089	183.534	172.683	164.758	179.344	178.891	151.433	114.534	103.491	10.5561	17.2082
alg14	14.9751	11.4042	15.8799	14.0809	13.8903	14.9993	16.8892	18.1094	14.2375	12.6412	14.1357	14.7222	15.022	14.2044	8.95265	7.61314	3.5095	2.54269
alg2	20.5626	17.2322	26.0748	25.5933	33.7271	34.9446	43.5995	42.3337	60.9627	61.7877	67.3686	63.8994	61.9553	72.8242	49.5243	46.9179	53.7615	58.9676
alg3	6.85638	4.22687	4.61613	4.63533	8.89269	6.59056	9.45481	8.31184	12.8592	12.3266	8.46546	8.40943	12.4112	11.543	13.2504	15.9951	6.16816	7.11719
alg5	14.0562	14.4425	18.6176	21.3244	27.8801	29.9593	39.4959	46.2569	43.3862	43.8945	58.235	59.6681	54.8255	57.8153	45.4431	39.9121	62.0068	54.2387
alg6	292.993	297.794	296.148	297.079	260.478	257.192	237.618	256.223	195.215	197.172	159.121	159.091	146.946	167.471	104.374	108.954	12.2498	15.0195
alg8	94.0178	95.4264	97.3646	91.766	87.6286	88.2671	93.7483	88.1823	88.3189	85.2751	122.101	109.826	101.434	95.2637	83.8679	78.7774	26.1368	26.3052
alg9	153.403	161.423	158.383	153.335	168.471	163.252	158.386	160.29	133.789	135.16	156.342	158.969	144.666	151.389	73.6791	84.6898	14.6456	14.3002
alk	0.224959	0.15602	0.162524	0.149831	0.255988	0.111723	0.36342	0.48972	0.757488	0.682488	2.10579	1.85049	3.18461	3.27644	0.772129	1.40789	0.217838	0.0631309
alkal1	0	0	0	0	0	0	0	0	0	0	0	0	0	0	0	0	0.1758	0.12737
alkal2	0	0	0	0	0	0	0	0	0.067157	0.0224102	0.0414876	0	0.0508719	0.0806891	0	0	0.103002	0
alkbh1	5.32756	6.07325	7.74213	6.80301	9.09357	10.3553	14.5194	14.776	12.6192	13.8716	15.1903	13.1639	12.3707	16.1096	10.318	9.00617	13.0218	12.6309
alkbh2	7.31396	4.46099	8.0947	8.5404	11.9529	12.2109	15.0064	14.1211	25.5709	25.8088	23.2099	25.7154	25.8401	27.1034	17.6746	16.7187	3.85766	6.11393
alkbh3	2.04901	0.842124	2.33928	2.66876	4.57689	3.69354	4.5267	3.89536	13.7989	12.6885	4.92531	5.65991	6.27167	4.23696	2.17851	1.26652	4.23284	5.19646
alkbh4	72.3457	73.5141	72.014	67.0586	64.2718	64.0239	55.0683	56.3032	65.2914	65.8394	64.7272	66.3705	48.7831	52.5842	14.1431	15.473	7.29626	8.09459
alkbh5	50.7645	47.9851	62.0659	57.1384	77.4206	81.3031	90.483	92.6484	151.212	146.518	201.794	198.111	219.626	223.577	193.922	204.753	110.764	101.746
alkbh6	1.58941	1.83722	2.29657	1.79963	3.3912	4.93349	7.8018	6.28269	19.4676	20.0247	1.98375	2.17905	5.01696	3.61705	4.95941	2.69403	2.00083	0.892082
alkbh7	13.644	9.90087	12.5954	15.5495	16.8197	11.3876	13.1874	12.9403	14.2294	13.4146	20.3404	20.9226	19.286	18.6299	12.6537	8.89476	5.28484	5.84979
alkbh8	152.77	150.928	153.838	146.958	154.434	160.484	158.858	153.322	143.483	145.854	169.614	169.323	166.733	166.324	87.9948	97.5125	17.1692	15.8692
allc	0	0	0	0	0	0	0	0	0	0	0	0	0	0	0	0	0	0.0715007
alms1	10.217	10.629	9.26207	8.24406	10.9246	11.1689	9.61724	7.95209	11.1315	11.1042	8.2081	8.67272	9.23349	8.17793	17.3141	26.1525	32.7284	30.5672
alox12b	7.74979	5.11138	7.35544	7.89425	8.68902	10.8107	8.72414	8.40924	23.6393	24.0494	39.3302	40.0826	49.6219	49.4509	56.2575	57.417	28.9584	28.145
alox15b	0	0	0	0	0	0	0	0	0	0	0	0	0	0.0470908	0	0	0.0601131	0
alox5	0	0	0	0	0	0	0	0	0	0.0199293	0	0	0	0	0.0737899	0	0.183199	0.0663654
alox5ap	0	0	0.0546024	0.0604054	0.0645022	0	0	0	0	0	0.0707473	0	0.1735	0.137596	0.212243	0	1.49299	1.71799
alpi.1	0.0423596	0.156685	0.0408042	0.0902814	0.0964044	0.0841491	0.0842234	0.194134	0.0570537	0.171349	0.0528691	0.123892	0.0648279	0.102825	0.0528695	0.176736	0	0.23775
alpi.2	0.0565351	0.0522797	0.0544591	0	0	0	0	0.20728	0.152293	0.190575	0.211685	0.248027	0.259567	0.137235	0	0	0.262778	0.0634623
alpk1	2.84568	2.78782	3.79967	4.26354	5.41835	5.31724	5.96617	6.19807	9.94257	11.1122	23.1388	25.8753	23.9314	21.6464	15.1916	16.1637	4.01608	2.84646
alpk2	0	0	0	0	0	0	0	0	0.058874	0	0	0	0	0	0	0	0	0
alpk3	0.102761	0.237566	0.230971	0.164262	0.409272	0.340232	0.204319	0.20408	0.346019	0.357946	0.384769	0.350643	0.393168	0.29102	0.0427524	0.107187	1.24717	0.519086
alpl	0	0	0	0	0	0	0	0	0	0	0	0	0.41794	0.745766	71.1514	155.67	119.529	114.88
als2	4.8976	4.61777	5.84633	5.83317	8.17392	7.57359	10.0434	9.94654	14.9521	15.7714	13.5199	12.7795	15.608	15.0123	13.6398	13.3823	2.91621	3.21239
als2cl	0	0	0	0	0	0	0	0	0	0	0	0	0	0.0452828	0.0465661	0.155664	4.45099	4.94193
alx1	3.49295	2.47003	2.07819	1.09479	1.40285	1.22451	1.63412	2.91914	0.207557	0.346308	0	0.300471	0.471677	0.249379	0.38467	0.428633	6.04849	5.53545
alx4	0	0	0	0	0	0	0	0	0	0	0	0	0	0.0942665	0.339283	0.324051	0.120335	0.435922
alyref	1347.44	1396.49	1402.17	1404.27	1472.53	1482.36	1460.59	1521.85	1393.16	1384.35	1167.12	1152.34	1247.11	1261.34	1893.55	1725.61	1928.29	1943.49
amacr	91.7324	84.6641	77.0309	78.4302	73.6835	78.0233	74.0469	77.7575	91.0864	90.5304	64.1461	69.5963	55.7765	54.4338	13.5801	12.9177	1.64465	1.29088
ambn	0	0	0	0	0	0	0	0	0	0	0	0	0	0	0	0	0	0
ambp	0.102734	0.0950011	0	0.109479	0.116904	0.40817	0.306398	0.188332	0.899412	0.484831	0.128222	0.450707	0.471677	0.249379	0.897563	0.214316	12.8928	15.1072
ambra1	6.64345	5.77923	5.55833	5.03602	10.4824	11.8029	11.3878	11.7707	12.9031	12.0861	26.4352	27.0675	26.5711	25.79	7.07365	16.6095	25.4673	25.39
amd1	7.67087	7.30212	8.76562	7.894	10.1837	11.4289	13.3455	11.1326	35.2751	32.6012	46.1807	47.1804	61.3454	64.8067	42.4733	46.5954	60.0652	67.1557
amdhd1	52.0792	52.8661	49.3853	52.1183	49.1056	50.1901	59.4013	51.7927	69.3501	65.3483	65.8289	69.1477	60.7369	63.478	52.6634	52.0138	28.4583	30.8036
amdhd2	2.86211	2.14473	2.94715	3.47071	6.06453	4.9995	6.27942	6.33237	7.31111	6.55396	13.365	9.74209	9.81775	9.76254	5.29676	4.2207	3.36404	3.2682
amelx	0	0	0	0	0	0	0	0	0	0	0	0	0	0	0	0	0	0
amer1	150.812	164.508	145.984	149.834	142.309	138.55	122.231	124.973	107.595	109.001	92.0033	97.2922	80.8033	85.5554	81.9689	112.054	36.8468	37.2405
amer2	0	0	0	0	0	0	0	0	0.0403877	0.040432	0	0	0.0917819	0	0	0	1.48668	1.14444
amer3	0	0	0	0.018887	0	0	0	0	0	0.0119488	0	0	0	0	0.0221208	0	0.0274598	0.0198951
amfr	191.758	210.227	205.154	208.92	205.287	210.95	202.811	207.449	202.889	207.612	186.855	186.948	186.115	185.396	114.814	139.312	45.2922	48.6705
amh	0	0.041978	0	0	0	0	0.0451292	0.0832178	0.183426	0	0.169972	0.132769	0.208419	0.275482	0.0566578	0.473499	0	0.0509571
amhr2	0	0.0793832	0.124039	0	0.0488426	0.0426335	0.0853423	0.236056	0.144529	0.0868127	0.214286	0.125537	0.394135	0.260477	0.214287	0.268625	0.39901	1.25272
amigo1	0	0	0	0	0	0	0	0	0	0	0	0	0	0	0	0	0.145239	0
amigo2	0	0	0	0	0	0	0	0	0.0690392	0.0230383	0	0	0	0	0	0	0.105889	0.191796
amigo3	0	0	0	0	0	0	0	0	0	0	0	0	0	0	0	0	0	0
ammecr1	360.432	394.019	367.139	359.08	375.154	370.525	349.151	328.426	389.851	393.374	326.878	328.527	367.675	344.996	267.094	304.847	89.9186	103.41
ammecr1l	10.7392	12.0242	16.4808	13.6883	18.2708	19.9744	25.6966	20.1214	35.0978	33.2553	42.4449	43.9581	36.1742	29.9662	1.90543	2.41606	4.32283	4.49111
amn	0	0	0	0	0	0	0	0	0	0	0	0	0	0.0767039	0	0	0.0979153	0.141882
amn1	1.22695	0.882468	0.262644	0	1.39619	1.62493	1.08424	1.4995	3.58057	3.03304	1.87167	0	2.08639	1.32371	5.10458	2.84399	2.1122	2.60155
amot	4.45545	3.74684	4.60589	4.3013	6.78354	6.92347	6.91415	7.61278	14.3334	13.0513	7.98284	8.99011	4.77547	5.27576	0.561903	1.19827	3.07871	3.31102
amotl1	0.836382	0.706173	1.05087	0.852542	1.40692	1.33643	2.20525	2.23322	13.6896	14.244	5.58254	4.9456	5.12005	6.53214	15.2046	16.9929	21.2406	21.3081
amotl2	3.38648	3.64286	2.19694	1.98853	1.57289	1.47591	1.13367	0.950219	1.34975	1.32793	0.388164	0.505338	2.06252	2.64229	65.9452	69.9256	133.848	132.623
ampd1	0	0	0	0	0.0543477	0.0474388	0.0474807	0	0.0321639	0	0.298048	0	0	0.173902	0.0596101	0	0.221992	0.107225
ampd2	0	0.0961669	0.025044	0.0554111	0.0295846	0	0.051693	0.0476607	0.140069	0.157751	0.129796	0.304159	0.119366	0.0946648	0.0648983	0.108473	3.06135	2.24719
ampd3	0	0.0871498	0	0	0	0.0624061	0.0312306	0.0287945	0.0634677	0.0423583	1.64676	2.02135	3.41349	2.55459	3.84246	3.40781	0.194688	0.317373
amph	2.27175	2.58045	2.05048	2.43996	2.05586	2.43413	1.86722	1.57401	1.43352	1.26626	1.45118	1.33409	1.75205	1.54146	0.826059	0.895591	1.80144	1.30517
amt	8.97983	6.8928	9.27199	7.13014	11.8213	9.38578	12.895	12.2657	16.8379	16.3816	21.4632	16.9942	22.6354	18.0937	23.0017	21.9165	13.5492	14.2967
amy2a	0	0	0.0479929	0	0	0.0989741	0	0	0	0	0.0621834	0	0	0	0.0621838	0	0.463154	0.279635
amy2b	207.099	218.084	198.334	201.456	180.279	164.31	176.87	190.447	150.412	150.983	258.011	263.473	238.43	242.776	187.219	193.969	70.5141	68.4841
amz2	0.127329	0.176618	0.183981	0	0	0.126472	0.063292	0.058355	0.814617	0.557982	0.47676	1.30342	1.1692	0.772707	0.158921	1.32813	0	0.142931
anapc1	56.5684	59.9129	61.3893	62.4992	78.7791	77.6654	82.9043	78.7659	93.1108	91.6892	126.027	125.929	117.523	112.989	84.4347	92.0539	10.971	10.486
anapc10	501.682	525.029	469.485	471.934	401.624	405.983	361.863	374.347	275.551	260.517	275.961	288.485	254.822	266.385	195.242	177.857	18.127	20.4296
anapc11	35.2177	37.9449	50.7311	49.925	53.6787	41.3991	80.9442	55.3803	105.095	103.904	87.5073	84.1035	98.895	75.6847	122.188	99.0817	37.5444	34.818
anapc13.1	13.654	14.3799	14.2487	14.7526	18.7743	19.1189	20.7382	17.4692	15.6447	15.1504	20.3553	10.677	14.2211	16.9174	13.373	13.4508	13.2218	18.6266
anapc13.2	0	0	0	0	0	0	0	0	0	0	0	0	0	0	0	0	0	0
anapc15	103.439	117.292	115.13	112.916	108.831	113.709	101.76	110.101	81.5402	72.6496	77.8811	69.6672	71.6231	62.1904	26.0604	25.5341	18.2202	19.936
anapc16	181.919	171.609	196.127	196.486	199.745	202.894	203.404	220.033	179.401	176.101	159.892	162.053	150.557	155.406	94.1429	94.4954	16.2828	19.7117
anapc2	8.9319	8.13318	10.2281	9.85826	17.9423	18.2415	23.0599	19.7991	28.2957	30.6618	50.3363	51.2476	70.6492	67.0359	89.5253	84.8949	29.6542	28.5443
anapc4	32.963	36.5039	40.2716	43.1379	51.507	51.5075	60.6647	62.2701	78.6432	77.1306	103.857	105.344	105.816	105.777	101.9	106.251	75.2367	77.8395
anapc5	16.0671	16.9281	21.651	22.2211	33.4193	29.4761	38.5361	38.5077	61.2559	59.4882	56.1604	54.4392	59.1892	59.7814	32.3267	34.8918	9.04602	8.27873
anapc7	25.6114	26.3708	40.2327	39.3648	60.5858	65.0653	79.4694	81.3514	95.9247	96.4285	94.1144	94.7143	95.8799	95.3472	39.9574	39.5579	13.6594	12.108
ancv1r	0	0	0	0	0	0	0	0	0	0	0	0	0	0	0	0	0	0
angel1	54.6081	58.5774	56.5043	54.7502	52.2495	46.8277	45.4214	46.4249	46.092	43.5348	39.3036	37.5997	40.6723	41.4242	29.5347	30.4735	3.24327	3.01388
angel2	168.535	159.594	162.794	164.251	135.584	142.479	114.889	108.239	98.7921	97.5581	64.4552	56.1068	66.1332	59.1345	38.3586	41.4039	26.8422	25.4831
angpt1	1.04541	1.73205	1.30074	1.4854	2.13138	1.68736	1.34242	1.63697	3.4908	3.64147	2.33774	2.10208	1.19994	1.85038	1.14169	2.09	0	0.0977923
angpt2	0	0	0	0	0	0	0	0	0	0	0	0	0	0.0442981	0	0	3.61908	1.51589
angpt4	1.89535	1.42406	2.3963	2.01979	1.75238	2.23558	3.53298	2.38876	1.43596	1.757	1.03495	1.55909	1.08775	3.16307	36.8148	31.6316	132.145	81.1142
angpt4.2	0	0	0	0	0	0	0	0	0	0	1.94453	1.19343	13.2844	12.5163	214.548	203.523	672.667	645.924
angptl1	0.138619	0	0.0445096	0	0	0	0	0	0	0	0.115341	0	0	0.0560814	0.0576706	0	0	0
angptl2	0	0	0	0	0	0	0	0	0	0	0	0	0	0	0	0	2.39218	1.37866
angptl3	0	0	0	0	0	0	0.0837022	0	0	0	0	0	0	0	0	0	0	0
angptl4	0	0.0468488	0	0	0	0.0503212	0.0503657	0	0	0	0	0.0740872	0	0.0614894	0	0.105688	0.23548	0
angptl5	0	0	0	0	0	0	0	0	0	0	0	0	0	0	0	0	0	0
angptl6	1.95899	1.7109	1.67739	2.84147	2.29112	1.83771	2.27212	2.64354	0.219879	0.183434	1.1546	1.7507	1.33248	0.924646	0.815014	0.45408	0.16862	0.122168
angptl7	0	0	0	0	0	0	0	0	0	0	0	0	0.113087	0.0896853	0.276681	0.154151	0	0.248842
ank1	0.108683	0.0861447	0.14956	0.132364	0.247346	0.169638	0.0926114	0.128081	0.334591	0.251219	0.465076	0.385985	0.356421	0.508795	0.213161	0.323895	0.192443	0.313713
ank2	1.01043	1.10488	0.888072	1.2261	1.23372	1.1648	1.15849	0.784194	0.124173	0.174033	0.147284	0.161784	0.203174	0.0895164	0.0920532	0.138475	0.319958	0.165582
ank3	0.0640432	0.0814312	0.0771144	0.110903	0.136644	0.182885	0.143254	0.308185	1.90848	1.8728	1.10906	0.878019	1.59271	1.54489	2.41797	4.12498	23.4172	22.8522
ankar	0.402077	0.212465	0.442644	0.306054	0.457535	0.513478	0.399724	0.210597	0.3288	0.290437	0.286762	0.54599	0.351627	0.209146	0.32261	0	0.667456	1.19284
ankdd1a	8.84527	9.08832	11.2423	11.9789	12.0923	12.1414	9.95376	12.3303	11.8722	9.52478	14.1831	13.6537	15.3231	15.7307	2.98997	3.58797	1.2372	2.27541
ankdd1b	1.38541	1.83019	1.85882	2.32001	2.08323	1.76926	2.45947	1.72339	2.0326	2.702	3.89056	5.86092	5.07348	5.52491	1.72915	1.75474	24.378	23.0498
ankef1	0.433043	0.444942	0.695235	1.69207	0.985543	1.1948	2.00904	1.19078	1.26373	1.49219	0.840749	1.12582	1.25184	1.63517	2.04183	1.70639	8.4985	10.6403
ankfn1	0.0924457	0.170975	0.118735	0	0.0350656	0.183647	0.214444	0.141226	0.249028	0.311627	0.307685	0.360508	0.613083	0.149604	0.0384609	0.192854	0	0
ankfn1l	0.0804852	0.0186068	0.116295	0.0857694	0.114483	0.0599577	0	0.147546	0.0542024	0.0406964	0	0.0882749	0.061588	0	0.0753409	0.29383	1.27817	1.62625
ankfy1	3.5676	2.74035	3.54745	3.83249	4.84542	6.28702	5.89213	6.32915	12.7492	12.414	14.6509	13.4637	14.8386	15.7139	11.6346	14.945	4.81424	5.23199
ankh	0	0	0	0	0.0675229	0.117878	0	0.0543896	0.119884	0	0	0.173551	0.181625	0.07202	0.296244	0.247576	0.91936	0.599483
ankhd1	19.4725	18.3046	25.2709	25.7835	40.1292	43.3431	51.2316	54.2903	88.6049	94.1809	76.5088	77.648	72.7193	73.6192	15.52	28.7234	14.0396	12.5815
ankib1	1.48108	1.27373	1.8547	1.51519	3.2359	3.41298	5.47738	4.92794	11.7796	12.0821	10.13	10.483	12.0134	13.4102	2.40312	4.04755	14.9845	12.9846
ankk1	0	0	0	0	0	0	0	0	0.0389072	0	0	0	0	0	0.0360538	0.120523	0.0895113	0.0972786
ankle1	74.0711	78.4516	49.6708	52.2686	35.9022	39.4204	26.7466	25.8444	30.3296	30.5157	19.5194	19.1582	15.332	15.4604	5.40323	6.90338	11.6939	9.59193
ankle2	66.3344	66.5113	64.7389	63.3798	73.2956	79.5343	75.4657	70.3604	100.253	104.587	96.0301	100.92	79.7956	91.724	39.4416	55.0056	47.5789	50.9398
ankmy1	3.45387	3.44149	4.35869	4.22275	4.81381	5.07946	5.776	5.71811	8.18605	8.03259	5.54722	4.22864	3.27806	3.96455	3.00755	3.29542	4.27271	4.59839
ankmy2	143.169	147.172	133.506	139.94	128.464	125.065	118.639	115.316	108.23	109.295	96.7563	99.4579	77.9944	77.4046	10.2822	11.6562	3.42251	3.8216
ankra2	8.57367	7.20118	8.74753	8.19047	7.62025	8.3648	8.59915	9.43965	9.17331	9.3886	6.07857	8.90268	5.5125	5.72637	5.22381	4.86833	12.1439	13.3828
ankrd1	0	0.145983	0.101379	0	0	0	0	0	0	0	0	0	0	0.0638679	0	0.109776	0	0
ankrd10	4.38099	3.35006	3.20567	3.72592	4.12242	3.34731	3.81093	2.9731	5.61702	4.94159	5.04731	5.05141	7.22049	5.11276	9.62151	10.5454	33.09	37.4036
ankrd11	47.5502	50.3391	52.0048	51.0988	62.8452	65.936	60.6047	62.3863	58.3481	63.8649	79.2925	84.0778	70.2901	77.7125	25.7605	40.5709	50.2143	56.7865
ankrd12	39.5919	36.3711	32.5577	31.1102	37.1088	37.5475	32.3553	33.441	30.1917	33.1431	25.5096	28.5803	17.8813	18.6841	9.11935	12.1871	22.5147	20.2944
ankrd13a	40.6695	43.4337	48.2212	49.6094	54.8676	56.2551	57.2895	57.6324	66.4105	64.8541	64.5808	60.7489	55.3897	57.8967	13.3267	14.7947	2.60885	3.02425
ankrd13b	0.129153	0.0398106	0.0829404	0	0	0.0427613	0	0.0394606	0.0869774	0.116097	1.18211	2.14053	2.17424	1.56755	0.913452	0.628671	0	0.0483261
ankrd13c	313.826	323.252	313.062	313.9	293.916	285.66	276.711	278.45	238.307	248.384	258.11	268.514	241.199	247.533	34.6576	39.7313	24.5981	28.2119
ankrd16	2.50729	2.45908	3.8058	3.23867	4.23644	4.45256	6.57143	5.91955	19.3924	18.6453	10.6208	9.44427	10.6976	7.56172	9.10362	7.60805	2.58978	1.79105
ankrd17	6.33626	5.85933	7.70384	7.34759	11.5765	13.551	15.9891	15.1192	21.8405	23.3215	28.1837	29.6469	28.1014	30.1193	30.2206	45.5433	88.3766	85.9128
ankrd2	0.0690011	0	0	0	0	0	0	0	0	0.0465195	0	0	0	0	0.0861211	0.143946	0.534535	0.464735
ankrd22	0	0	0	0	0	0	0	0	0	0	0	0.168296	0	0	1.00546	1.92064	5.52746	7.10518
ankrd24	0	0.0953548	0	0	0	0	0.034171	0.063011	0	0.0463463	0	0.050265	0	0.125154	0	0	0	0
ankrd27	22.93	22.7776	25.1782	23.7517	33.2031	35.3272	40.7107	36.4612	54.9114	55.0657	79.2418	83.2188	74.4541	74.2823	48.4646	45.74	10.5456	11.8678
ankrd28	114.589	120.047	119.975	118.069	121.973	124.249	121.628	126.836	119.529	122.218	123.054	120.514	116.712	117.372	60.1744	66.5839	8.16465	7.65649
ankrd29	0.82164	0.357551	0.419013	0.20602	0.164994	0.432059	0.864881	0.310106	0.390585	0.814613	0.301615	0.141359	0.517775	0.762593	0.0603234	0	0	0.162762
ankrd31	2.3361	1.60278	1.88736	2.19502	2.80124	2.17068	2.54718	1.45054	1.28565	1.06691	3.1038	3.04892	2.34503	1.82927	0.53298	1.20525	0	0.0563945
ankrd33b	0	0	0	0	0	0	0	0	0	0	0	0	0	0	0.0312909	0.261504	0	0.0281425
ankrd34a	0	0	0	0	0.044071	0	0.0385025	0.0354991	0	0	0	0	0	0	0	0	0	0
ankrd34b	0	0	0	0	0	0	0	0	0	0	0	0	0	0.0659767	0	0	0.210554	0.15255
ankrd35	58.6498	65.7166	60.2585	61.5868	65.836	70.0512	75.164	68.515	76.3645	76.7053	105.739	99.8849	89.7101	88.142	28.6148	41.5345	32.9628	32.7577
ankrd37	54.4964	50.2385	49.4073	46.3875	45.6938	43.2367	44.9522	50.4153	62.0383	60.2865	41.9053	42.9313	28.6615	26.6211	6.10684	7.3914	7.58076	5.1136
ankrd39	3.09349	3.92014	4.85613	4.02917	4.69356	4.89352	6.03687	5.25091	7.02147	6.02502	5.14799	7.0371	5.43572	4.31086	1.28701	2.62918	2.13018	3.21531
ankrd40	98.2941	97.0315	108.659	108.926	119.025	113.78	122.546	115.696	136.413	138.047	177.98	167.737	169.356	164.401	109.958	119.421	58.8794	57.9961
ankrd42	0.793527	0.831639	0.458633	0.394625	0.842779	1.15601	1.41999	0.969796	3.02825	3.06724	2.97121	2.39824	2.91463	2.18306	4.02767	3.86261	7.86849	6.82915
ankrd45	1.1882	0.929721	1.14457	1.55841	1.87211	1.1802	2.72594	2.26198	4.86266	5.36096	3.19413	2.67322	4.47615	4.43733	5.13346	4.38545	1.69932	4.20655
ankrd46	8.19083	9.42976	10.1935	11.7455	12.7298	13.5959	15.0835	17.0309	18.2141	19.2904	17.3242	18.4093	18.2562	17.1138	5.72903	7.91284	25.0402	21.9062
ankrd49	2.67161	3.27344	2.83086	2.98936	4.06614	3.78142	4.78076	4.74455	8.70354	8.78064	7.21074	8.59519	8.02404	7.0526	3.29279	3.20467	3.46663	4.46096
ankrd50	3.21265	3.76402	3.56039	3.22415	4.45436	5.09636	5.36443	4.28843	7.48839	8.27466	7.72748	7.79978	6.96931	6.73851	3.8735	4.84758	12.1539	11.5892
ankrd52	11.0561	8.89527	11.3274	11.1196	12.8593	13.927	14.4053	13.2256	27.8269	27.9949	18.4667	19.9532	18.6515	19.3307	2.89975	11.6279	10.5778	11.2669
ankrd53	0	0	0	0	0	0	0.0516826	0	0	0.140195	0	0	0.0795615	0	0	0	0.0805457	0.17507
ankrd54	93.1583	95.7844	89.701	94.7915	81.3817	79.4309	73.1712	74.6545	45.7127	46.555	43.7554	42.3441	43.8502	45.7239	19.2052	23.0868	0.998247	0.680703
ankrd55	13.2777	17.6108	14.6573	13.6846	13.6753	11.8406	11.7065	13.6805	19.1236	18.4586	2.23781	1.91335	2.52151	2.3526	0.907226	0.505456	0	0.217585
ankrd6	0.0236962	0.153388	0.0228261	0.101008	0	0	0	0.0217199	0.0319162	0.0159756	0	0.0346528	0	0	0	0.0494335	0.367137	0.771392
ankrd60	0	0	0	0	0	0	0	0	0.161876	0	0	0	0	0	0	0	1.86209	1.529
ankrd63	0.832388	2.39023	2.44767	2.05419	5.48378	7.13647	7.83963	4.73842	4.92709	3.69199	10.6625	11.0835	6.83884	8.98619	3.55417	2.46762	2.57932	1.86876
ankrd65	0.263753	0.182926	0.44462	1.19455	0.225099	0.0654946	0.458867	0.543952	0.843711	0.711274	0.164596	0.192854	3.12831	1.36052	16.0482	18.9828	16.6523	13.1752
ankrd66	0.133512	0.246924	0	0.284554	0.151927	0.132613	0.530921	0.856637	0.359651	0.63008	0	0	1.02164	0.810225	12.1645	10.0268	2.48227	2.24806
ankrd7	19.6654	19.5237	21.4915	22.4281	28.5686	28.7377	30.3013	31.3384	32.7279	34.8053	40.3675	40.1934	36.7673	40.2447	17.0691	24.8508	12.1668	12.7744
ankrd9	0.139154	0.0643399	0.033511	0.074145	0.197934	0.207326	0.449603	0.22321	0.49199	0.515984	1.21575	1.11923	1.59723	1.56226	0.390779	0.870881	24.0392	23.7821
anks1a	20.4191	19.1591	26.6191	26.3727	39.6552	43.2946	48.4213	51.5816	66.2621	66.2431	52.6013	55.5006	58.0412	60.6026	40.4706	45.4367	19.6567	20.0483
anks1b	0	0	0	0	0	0	0	0	0	0	0.0487617	0	0.0597914	0	0.048762	0.489015	0.302655	0.350846
anks3	85.3653	93.9477	86.5335	95.254	75.9045	82.7204	69.5702	71.3311	53.8456	52.9679	45.3435	44.854	56.5874	51.9853	40.1404	36.5485	40.9086	39.2215
anks4b	0	0	0.0654196	0	0	0	0	0	0.0457359	0	0	0	0	0	0	0	0	0
anks6	0.246287	0.085406	0.444831	0.328071	0.420386	0.642153	0.765143	0.790114	1.0159	1.20381	0.19212	0.450206	0.141346	0.186827	2.84339	2.31204	13.2124	13.5122
ankub1	21.0739	24.8071	20.3519	21.4836	18.4137	26.5923	24.9056	21.5831	20.6727	21.5653	69.6478	62.2651	61.7888	72.6878	54.0143	44.7481	0.499759	0.724167
ankzf1	4.0819	2.93262	4.41595	4.38335	9.11117	8.23361	13.1729	11.5985	30.1537	30.3138	31.3124	30.7647	32.5325	32.4695	25.199	26.2667	11.2864	12.5478
anln	218.21	223.064	204.743	200.761	197.994	198.762	182.319	175.11	139.934	140.352	156.003	159.619	107.63	112.481	13.4953	15.7079	27.1586	30.2253
ano1	102.612	84.6069	72.3439	68.9037	65.891	62.314	51.9096	43.9554	43.369	44.6776	57.3236	55.2364	42.3807	42.3442	9.46754	13.6024	2.9784	4.40328
ano10	8.05841	8.80907	8.96289	8.55797	13.9282	13.9179	13.4897	13.9858	17.6607	15.7198	23.71	24.1358	24.284	25.5103	11.6822	16.8687	2.6601	2.33139
ano10l	0.204169	0	0	0.0543935	0	0	0.101487	0	0	0	0.127412	0	0	0.185853	0.0637065	0	5.29852	5.50047
ano2	9.78853	8.28801	9.72375	10.3986	11.069	10.2088	11.3734	11.6077	11.1035	12.188	8.47561	10.1991	8.00523	8.35347	0.954466	1.72295	0.189573	0.103012
ano3	0.0932013	0.0574574	0.0598526	0	0.0707043	0.030858	0.339738	0.113904	0.188298	0.188505	0.891824	0.227159	0.713185	0.527893	0.232651	0.0648101	0	0
ano4	0	0	0	0	0.0604211	0	0	0	0	0	0.0331355	0	0	0	0.165679	0.110768	0.164533	0.0298017
ano5	49.2655	57.7468	52.2565	52.6047	51.759	54.2248	49.3189	46.5968	47.5761	51.4181	54.9628	61.4553	55.9747	52.8228	34.283	45.2167	45.676	46.5948
ano6	12.4336	14.6059	10.1757	11.3648	13.7172	12.601	13.6924	12.578	10.5348	11.0234	14.2568	16.7414	10.2879	9.26312	1.41938	3.00504	3.21068	2.63824
ano7	0	0	0	0	0	0	0	0	0	0	0	0	0	0	0	0	0	0
ano8	0.875209	1.36238	1.33486	1.35237	1.02912	1.82557	1.16012	1.57769	1.75839	1.88817	0.200264	0.426629	0.424155	0.973733	0.18206	0.39559	3.16401	2.35788
anos1	0	0	0	0	0	0.0590385	0	0	0	0	0	0	0	0	0	0	2.70134	2.66886
anp32a	22.2299	26.7569	22.1505	23.4016	24.6303	21.1416	21.6077	25.6967	25.0924	23.1176	24.4315	26.5201	33.5389	39.1603	52.2331	56.6069	55.3579	60.3131
anp32b	352.976	357.723	366.294	384.958	433.038	458.628	436.42	442.87	401.831	392.657	355.197	354.676	349.127	347.364	343.514	336.288	133.378	136.126
anp32c	2467.07	2613.89	2491.84	2526.05	2399.11	2410.95	2265.17	2406.91	1725.54	1725.78	1513.66	1472.1	1806.52	1733.69	3946.24	3849.36	1740.76	1729.34
anp32e	919.158	988.509	950.788	961.46	1009.15	977.575	952.665	964.328	910.126	919.475	741.893	741.047	722.678	743.278	736.657	805.838	574.854	619.376
anpep	0.0305602	0	0	0	0	0	0	0.0280115	0.102903	0.0206032	0.228854	0.134072	0.18708	0.185457	3.66168	5.48273	9.99053	13.7562
antkmt	0	0	0	0	0	0	0	0	0	0	0	0	0	0	0.0899636	0	0.335031	0.728206
antxr1	0.0690749	0.0319378	0.0665385	0.110415	0.117904	0.171525	0.446359	0.31657	0.395404	0.372554	0.431063	0.707096	0.634281	0.461105	0.172426	0.432298	0	0.0387693
antxr2	0.0559235	0.0517141	0.05387	0.11919	0.0636369	0.0555471	0.0277981	0.102519	0.0564921	0.0754055	0	0	0	0.0339376	0.104698	0.116664	0.259935	0.156939
antxrl	1.90183	1.96867	1.42185	1.51246	1.22743	1.5507	1.24165	1.30091	0.649946	0.535838	0.743988	0.373593	0.695067	0.551231	0.247998	1.00667	6.11309	6.62762
anxa1.1	82.1291	68.0793	79.9761	75.2091	92.9475	86.5582	102.751	101.878	82.6324	89.7274	91.7744	96.3974	78.8144	77.2884	60.8107	65.0203	60.7787	56.4012
anxa1.2	13.6301	16.0968	13.1296	12.3374	15.2297	15.985	14.3666	15.278	26.4866	29.4496	15.577	15.7297	16.9642	15.3471	14.5523	11.819	12.5943	15.3923
anxa1.3	0	0	0	0	0	0	0	0	0	0	0.219163	0	11.5557	10.0168	21.2589	22.3454	3.40076	3.05524
anxa10	0	0	0	0	0	0	0	0	0	0	0	0.160711	0	0	0	0	0	0
anxa11	3.38537	3.09615	3.76276	4.00407	4.7413	3.32563	4.80794	3.88731	6.01281	6.14482	3.66811	4.13464	3.35913	2.70915	4.27175	3.33714	54.4685	60.0929
anxa13	0	0.0719082	0	0	0.0884867	0	0	0	0	0.104851	0	0	0	0	0	0.324441	0	0
anxa2	3.32759	2.28302	2.1714	2.17339	2.19865	2.239	4.05511	4.13235	7.80716	7.96047	9.5121	11.3021	22.8346	16.9367	31.3499	22.3929	361.89	340.275
anxa3	19.2879	16.0239	23.9449	27.2591	31.4552	29.3006	40.5034	42.071	53.7633	52.9184	53.4246	55.809	65.6669	50.9512	69.903	59.1722	42.9878	44.2287
anxa4	15.0062	13.6615	12.214	15.8674	21.5766	22.5311	38.6258	39.2381	72.2292	75.6808	48.6379	45.4204	67.6509	73.5588	116.441	116.241	356.857	353.089
anxa5	28.9423	34.1702	39.0138	39.6685	51.162	49.9014	61.527	60.3982	86.9741	82.7745	100.19	108.74	102.238	118.97	90.308	82.0222	13.5371	11.4425
anxa6	0	0	0.0495595	0	0.175635	0.102205	0.0511476	0.282947	0.207887	0.17343	0.0642133	0.225712	0.078738	0.124888	0.128427	0	0.0797121	0.115505
anxa7	51.83	48.6833	52.3307	55.8466	76.7272	76.6022	87.4523	85.3814	114.377	113.371	114.943	118.395	137.931	150.336	154.357	157.181	169.38	187.202
anxa9	0	0	0	0	0	0	0	0	0.050602	0.0506576	0.375125	0	0	0.0911974	1.0316	0.78375	87.3125	91.0935
aoah	0	0	0	0	0	0	0	0	0	0	0	0	0	0	0	0	0	0
aoc1	0	0	0	0	0	0	0	0	0	0	0	0	0	0.0531367	0	0.0913313	0	0.0491446
aoc2	0	0	0	0	0	0	0	0	0	0	0	0	0	0	0	0	0	0
aoc3	0	0	0	0	0	0	0	0	0	0	0	0	0	0	0	0	0.0826741	0.239595
aopep	6.07145	6.19435	6.75461	7.38134	12.1959	9.73954	10.7116	10.3464	15.5873	15.7581	17.7882	19.2581	18.0602	17.4365	8.28937	8.38443	1.05992	0.511953
aox1	4.38345	4.26826	4.64194	4.23815	6.21029	5.0748	7.8498	6.62549	9.42297	10.2357	14.855	15.028	15.7717	16.3483	13.6957	15.806	8.32071	9.25455
ap1ar	253.039	240.15	247.813	245.665	243.756	245.84	247.362	246.463	208.999	214.223	212.574	215.741	212.143	224.589	156.388	146.153	26.301	27.899
ap1b1	27.8286	27.0572	36.3106	34.9126	50.7357	51.4675	64.5783	63.0961	84.2712	83.5513	101.332	107.77	107.424	112.206	102.085	102.675	47.317	46.0334
ap1g1	77.7942	80.5637	82.406	81.2555	90.3816	86.6219	86.3507	84.504	92.8653	99.3341	121.032	124.207	118.656	124.419	96.3682	93.7616	56.7653	52.579
ap1g2	1.98877	2.84483	2.18515	3.21213	2.29844	2.19145	1.05035	2.59195	1.88343	1.44555	0.81447	0.908856	0.428014	0.52802	0.581768	0.777909	0.337018	0.802289
ap1m1	16.4926	13.8049	19.1739	18.939	28.0702	28.9502	34.9123	38.9656	50.1244	45.3388	51.3723	46.2615	52.2218	57.2908	64.9478	56.0575	31.5004	24.5781
ap1m2	11.2606	11.0092	7.12101	7.19079	4.98857	2.86024	3.24732	1.33943	2.60498	2.20218	1.39471	1.38275	0.986648	0.834637	4.45238	5.20033	13.7176	15.3904
ap1s1	17.9614	13.8412	14.0204	15.7305	21.6134	20.0962	27.6053	23.5597	73.4101	68.8279	79.6212	68.9868	94.9455	92.0861	145.458	135.02	140.422	127.462
ap1s2	7.93509	5.7072	9.6962	10.9616	7.85907	8.97637	10.3721	9.09163	15.5367	14.9099	12.8383	11.4967	14.8427	13.9114	10.8209	10.2694	4.89493	5.52587
ap1s3	35.5475	33.8699	36.9712	39.319	38.1479	37.6532	41.1735	39.1365	57.4634	52.1604	52.6174	50.8989	46.1441	50.2671	16.9219	18.4337	33.2334	35.8901
ap2a1	15.3822	14.7941	18.5563	17.2456	25.5664	29.0274	29.3389	28.3304	58.2126	60.0765	57.8776	54.3594	58.1144	52.0954	20.1471	32.4749	32.9326	35.1794
ap2a2	10.9339	10.7406	12.063	12.3371	17.2638	16.422	22.2663	17.5471	47.1612	46.7283	48.7311	45.1467	66.4125	61.8989	70.5	65.1926	23.3883	21.6593
ap2b1	29.6771	29.5497	30.8769	35.6008	44.5139	42.757	48.6692	48.2617	56.5564	57.9538	69.3833	72.2194	63.7071	67.5117	52.5322	52.5447	48.1796	49.5811
ap2m1	34.8215	30.5953	43.1192	43.1054	62.7884	59.7176	85.7598	85.9165	143.323	144.97	219.339	225.227	277.888	284.99	333.967	339.399	365.674	372.046
ap2s1	123.216	122.535	120.515	113.7	92.2338	93.6704	77.6714	78.7108	76.9528	74.9489	52.6224	56.8751	55.5708	66.4199	70.8796	62.4663	38.6609	33.4194
ap3b1	92.1874	92.0272	86.0546	85.0176	88.1221	87.9972	80.5038	77.5445	76.6818	75.7469	92.1685	93.3929	79.8843	77.7893	55.0024	57.1828	20.2402	22.3167
ap3b2	0.0464388	0.0214717	0.0671003	0.123719	0.0792661	0.0922526	0.0692505	0.0212829	0.172007	0.125233	0.0579604	0.237689	0.248748	0.197272	0.289804	0.77502	4.78467	4.24851
ap3d1	267.16	288.538	272.188	265.247	264.024	258.036	239.294	246.514	224.153	228.477	230.713	232.205	222.331	221.056	174.34	181.692	32.9008	33.8264
ap3m2	141.772	140.074	147.86	140.381	141.238	148.18	141.345	133.037	111.131	103.122	125.309	120.414	116.323	107.544	89.6512	91.9317	122.355	109.6
ap3s1	228.256	229.875	207.985	210.455	182.489	169.657	162.589	173.947	137.582	132.96	125.169	131.661	120.007	124.584	106.706	94.6665	18.1394	18.1344
ap3s2	52.0761	47.7166	48.7895	49.4135	51.006	45.8209	48.2254	47.406	57.4898	50.1785	54.4604	50.0745	40.577	43.1472	23.0011	19.8425	7.18421	7.87435
ap4b1	2.53309	3.05949	3.43602	3.47065	4.35312	5.03208	6.62971	6.25472	15.1093	15.0911	10.3234	10.5838	7.75337	9.28608	1.03235	1.07844	1.36161	1.56681
ap4e1	9.83645	7.34572	11.5975	11.1105	17.6549	18.6775	21.9948	21.7012	27.6257	28.4091	18.2411	20.4198	19.8977	19.7722	3.91159	3.94867	9.51906	8.18549
ap4m1	11.8725	9.83183	13.7694	13.848	12.0986	16.5449	14.5042	16.513	13.5247	15.8891	16.5137	12.1794	13.198	12.761	12.754	15.0331	12.0801	11.537
ap4s1	68.0048	63.3035	58.696	69.1026	63.6882	64.2594	66.8589	65.3671	43.5684	46.2535	29.106	23.102	9.67075	13.1477	3.56786	4.70798	10.2566	6.07997
ap5b1	8.63059	8.70651	8.67645	7.826	12.9637	12.6561	14.2585	13.6066	15.9572	18.4503	18.6843	21.6625	18.9241	20.6454	11.3987	14.6001	6.41847	7.04589
ap5m1	71.1385	72.2804	77.7322	74.3252	85.8479	82.2268	82.6141	80.6948	75.3142	75.7383	79.309	80.43	84.3658	88.1855	56.6384	54.7934	3.03983	2.84182
ap5s1	32.0836	29.6686	33.362	30.508	39.5044	36.9338	42.7731	42.8298	38.8917	38.768	36.758	37.5346	33.8673	34.4472	18.7898	18.0198	6.88274	9.88097
apaf1	13.4064	13.9201	14.0982	12.4575	17.235	16.242	18.7697	16.604	16.7292	17.9673	23.7961	24.5234	11.4301	12.8933	2.14224	2.61288	1.47339	1.32786
apba1	8.98903	9.30934	9.86541	10.1536	14.739	15.1801	15.0989	14.8802	21.7055	21.6972	25.8221	25.2706	24.8208	25.1491	13.7521	18.7523	4.74064	4.09313
apba2	3.5811	3.14054	4.66425	4.21038	5.28033	5.84484	7.18715	6.28749	10.009	10.2694	9.79951	8.16272	8.51678	9.50911	6.29523	6.94456	0.755414	0.585055
apba3	9.47901	8.97018	9.48623	9.00082	15.3193	16.5957	19.0671	22.1776	31.3715	35.1359	23.2933	25.836	26.9816	29.1873	10.1276	12.234	11.9433	11.4685
apbb1	2.58962	1.62839	2.22844	2.09732	3.7719	3.60107	5.21758	3.2598	6.53405	5.95927	11.4201	11.8659	13.5277	13.4523	26.762	36.2313	23.7524	20.1159
apbb1ip	0.16883	0.0390305	0.0406576	0.0449785	0.0960581	0.0419234	0.0839209	0.154749	0.369517	0.113822	1.15894	0.864125	0.64595	1.02456	0.684834	0.704403	0	0.142137
apbb2	3.93999	3.88984	5.35377	5.29397	7.45071	8.12943	9.00704	7.99042	16.1124	18.1833	21.9031	20.4862	11.0984	10.465	0.427612	0.357362	1.88736	2.20069
apbb3	0.141606	0.174597	0.0909375	0.100602	0	0.0468844	0.0469258	0.0865308	0.0953639	0.0954686	0.353478	0.207082	3.46746	2.92178	0.648047	1.08317	0.29253	0.0529857
apc	157.277	177.266	154.174	160.06	154.514	152.924	135.333	137.814	164.746	168.338	151.873	157.194	80.8955	86.6175	10.4832	21.1096	10.3144	8.85544
apc2	0	0.013685	0.0855331	0	0.151561	0.102895	0.147123	0.0678235	0.199325	0.239453	0.277059	0.302983	0.498268	0.251464	0	0.0617451	0.343931	0.265796
apcdd1	0.296194	0.502149	0.523082	0.368247	0.730269	1.0297	0.29446	0.361988	0.53192	0.798756	1.41711	1.37163	1.13325	1.25823	0.862593	0.926849	5.50689	5.15354
apcdd1l	2.17679	1.89792	3.41488	3.18131	2.90167	4.38606	6.55398	6.04274	0.837685	0.545093	0.776245	0.727609	1.99884	1.43423	0.232875	0.51898	7.5161	4.04925
apcs	0	0.194961	0.203089	0	0	0	0.104798	0	0	0.284277	0.263138	0	0	0	0	0	0	0
apcs.2	0	0	0	0	0	0	0	0	0	0	0	0	0	0	0	0	0	0.120896
apeh	31.1621	32.4501	31.7792	34.3689	36.7884	35.744	35.969	38.1199	31.4134	35.2511	41.7584	42.1004	33.3421	35.8388	27.7258	31.5708	15.6115	15.4158
apela	0	0	0	0.0628591	0	0.117179	0	0	0	0	0.294484	0.690083	16.4298	14.4617	146.212	166.737	162.218	165.27
apex1	94.255	95.0209	111.348	111.535	139.432	130.495	155.961	160.227	169.125	163.892	150.334	149.337	155.931	162.193	184.111	187.099	268.864	261.394
apex2	187.204	179.667	181.773	185.74	150.343	146.798	139.195	129.076	123.976	127.142	114.703	109.37	76.4529	77.8353	11.4344	11.6595	2.8567	2.97523
aph1a	64.2443	66.799	68.3077	68.6504	69.7893	68.1099	67.5994	65.3213	80.345	77.3671	102.447	94.7243	101.429	106.752	103.22	97.6381	128.611	129.561
api5	19.2725	17.2293	21.841	18.857	29.3906	25.5074	27.9311	27.3788	72.0648	70.6486	36.3579	38.1309	72.9454	78.8485	397.233	416.035	449.12	497.415
apip	79.626	76.323	93.9601	90.4835	94.1808	100.308	101.005	101.197	97.2961	102.41	148.308	154.623	155.021	154.072	77.5945	80.34	52.5503	51.309
aplf	3.38887	4.4158	4.84718	3.7208	7.42044	7.19114	10.1582	10.5424	11.3073	10.4197	17.4313	18.6969	17.0522	13.5234	7.49808	7.60521	0.795537	0.634018
apln	0	0	0	0	0	0	0	0	0	0	0	0	0	0	1.59182	1.77375	35.0744	43.1884
aplnr	0	0	0	0.183144	0	0	0.113903	0	0.0385795	0.0386219	0.0714999	0.3351	21.1292	11.681	145.003	163.128	143.166	149.448
aplp1	0	0	0	0	0	0	0	0	0	0.0414416	0	0	0.0470368	0.0373031	0.0767205	0	0.476187	0.379506
aplp2	69.0059	72.4679	59.7638	62.7903	65.9168	57.8067	59.566	50.2774	52.4405	54.2968	54.2947	56.2757	49.3437	46.4871	62.8739	69.3364	187.485	189.389
apmap	80.957	91.1124	82.1775	84.5184	89.4955	85.9487	83.8345	79.436	77.2933	77.0561	89.7788	89.4327	83.4788	87.9174	36.7731	36.8783	8.10159	7.77665
apmapl	22.8542	20.3154	18.8368	19.0379	17.2156	14.2277	16.1604	15.7849	0.867103	1.41059	4.01753	2.70668	2.09367	2.83246	1.70746	1.51089	4.73785	4.33598
apoa1	0	0.102234	0	0	0	0	0	0	0.223359	0	0.689922	0.485021	0	0.402548	0.275971	0	1.5416	1.36512
apoa4	0	0	0	0	0	0	0	0	0	0	0	0	0	0	0	0	0	0
apoa5	0.0478309	0	0	0	0	0	0	0	0	0	0	0	0	0	0	0	0	0
apob	0	0	0	0	0	0	0	0	0	0	0	0	0	0	0	0	0	0
apobec2	0	0	0	0	0	0	0	0	0	0	0	0	0.157727	0.125087	0.450213	0.215	1.8363	1.61966
apobec4	0	0	0	0	0	0	0	0	0	0	0	0	0	0	0	0	0	0
apoc1	0	0	0.230117	0	0	0	0	0	0	0	0.894476	1.04804	1.4624	1.73966	216.166	186.883	722.111	641.172
apoc2	0	0	0	0	0	0	0	0	0	0	0	0	0	0	0	0	0	0
apoe	0	0	0	0	0	0	0	0.130034	0.0477692	0	0	0.10373	0	0.086092	0.177063	0	0.879195	0.636992
apof	0	0	0	0	0	0	0	0	0	0	0	0	0	0	0	0	0.079459	0
apoh	0.106195	0	0	0	0	0	0	0.194676	0.357582	0.14319	0.530168	0.155297	0	0.515561	0.132543	0	0.164533	0.238414
apold1	0	0	0	0	0	0	0	0	0	0	0	0	0	0	0	0	0	0.158091
apom	0.590133	0.272857	0.284232	0.157219	0.167882	0.439621	0	0.676145	0	0	0.368273	0.215749	0.225788	0.53719	0	0.923322	2.97155	2.31855
apoo	1.44916	1.70557	2.15738	2.52705	1.64905	2.09369	2.09554	2.77736	5.76687	5.86202	5.26169	4.23845	7.45997	5.91621	10.6879	10.7184	6.53168	9.76039
apool	22.2603	18.6861	18.4242	18.0792	23.1172	23.1838	31.2613	26.6437	27.4351	26.8824	17.2633	15.8024	19.349	21.7715	17.8029	13.5256	5.3575	8.3697
apov1.1	0	0	0	0	0	0.560565	0	0	0	0	0	0	0	0	0	0	0	0
apov1.2	0	0	0	0	0	0	0.184867	0	0.125231	0.250737	0.464183	0.271937	2.56131	2.70837	17.407	14.3533	5.4741	2.08741
app	33.4547	32.5529	34.8191	32.4846	38.2281	35.7295	37.325	30.4402	40.9398	41.904	53.4043	58.0741	43.8701	43.7442	28.8403	32.3065	79.1848	75.1862
appbp2	1.27079	0.940109	1.63217	1.08338	2.89213	3.49219	4.84285	4.58156	10.6405	9.7669	7.0316	7.92906	9.33522	8.74012	6.9259	6.09738	11.8134	13.1713
appl1	46.079	43.7931	56.7953	56.2706	71.6733	81.0012	86.2045	88.0315	109.456	106.767	150.251	158.04	156.84	150.882	93.5674	102.549	15.9955	14.8849
appl2	26.4824	26.0691	28.9975	28.8714	32.5422	34.4258	34.2944	35.3107	40.0796	39.5477	42.8519	42.9511	32.1245	32.389	16.8565	13.7478	9.95826	9.08715
aprt	2.23083	1.37527	1.57587	1.6641	2.03082	2.58512	2.95703	3.13532	5.35834	5.41435	6.4967	6.30713	7.39721	9.2058	48.7256	49.1751	67.5136	75.292
aptx	93.0484	93.1343	79.8611	81.6501	74.7246	70.8539	65.2356	68.8765	53.1705	60.0671	56.9972	58.5652	45.9858	47.3931	16.6416	17.9806	3.68896	2.67271
aqp1	0	0	0	0.296181	0	0	0	0	0	0	0	0	0	0.168666	0.86723	1.15961	0	0
aqp10	0	0	0	0	0	0	0	0	0	0	0	0	0	0	0	0	0	0
aqp11	24.0345	23.6228	24.8155	23.772	39.059	44.8864	53.8684	49.6664	79.5725	74.1778	121.966	120.806	125.986	120.177	85.9514	94.8739	56.7486	51.1316
aqp12a	0	0	0	0	0	0	0	0.0451795	0.0331943	0.0332307	0	0	0	0	0	0	0.0763679	0
aqp2	0	0	0	0	0	0	0	0	0	0	0	0	0	0	0	0	0	0.0750905
aqp3	1.08068	1.04476	1.75076	2.30326	1.62101	1.46373	0.92785	0.855474	3.90353	4.90133	1.83927	2.01137	2.2553	1.72897	1.22619	1.43464	7.07792	7.33369
aqp4	0	0	0	0.203634	0	0	0	0.0583837	0.0428957	0	0	0	0.0974815	0	0	0	0	0.0715007
aqp5	0	0	0	0	0	0	0	0	0	0	0	0	0	0	0	0	0	0
aqp7	0	0	0	0	0	0	0	0	0	0	0	0	0	0	0	0	0	0
aqp8	0	0	0	0	0	0	0	0	0	0	0	0	0	0	0	0	0	0
aqp9	0	0	0	0.0657081	0	0	0.0612991	0	0	0	0.0769579	0	0.0943654	0.0748376	0	0.385892	0.382131	0.27686
aqr	9.12303	8.787	12.6771	12.5031	21.9557	25.346	36.5447	36.5359	83.971	81.8376	65.8133	67.3916	102.411	107.885	163.031	188.038	90.027	86.8846
ar	0	0.0170123	0.0177215	0	0.0209345	0.0548197	0.0182894	0	0.0247788	0.012403	0	0	0.0844655	0.0669863	0.0229615	0.153515	0.313538	0.0619537
araf	34.6976	26.3689	28.3381	24.8355	37.4678	43.8478	45.3367	42.4688	70.8961	69.1709	104.949	99.7044	91.3735	86.376	57.8721	91.0776	61.0235	60.3926
arap1	10.8714	9.71734	11.3157	9.71877	9.57587	11.1164	9.76733	9.06416	12.7008	13.1179	16.0477	15.0235	10.656	10.4469	0.639781	0.84657	0.628739	0.71926
arap2	0.117854	0.0653901	0.0681161	0.125592	0.026822	0.140474	0	0.0216051	0	0	0	0	0	0	0	0	0.0365196	0
arap3	3.15029	2.41275	3.68621	4.09857	7.10363	7.54437	9.70298	9.63699	24.6255	25.0305	29.3082	29.733	30.4952	30.4946	9.45588	14.9985	19.1942	18.5059
arc	0	0	0	0	0	0	0	0	0	0	0	0	0	0	0	0	0	0
arc2	17.4312	18.8844	19.6014	21.0628	24.0682	22.4574	21.0271	26.2057	23.8709	24.2905	36.5937	38.7166	33.2626	36.0281	15.4751	15.8236	1.017	0.818707
arc3	21.0932	23.0922	17.9887	18.5769	16.8613	16.709	12.8678	13.9213	13.9409	14.2354	12.9728	12.9375	12.3389	13.0121	2.85567	3.00021	4.5915	3.88921
arcn1	43.6564	45.65	49.8307	49.5955	70.6122	73.4358	78.4886	76.2778	97.9488	98.2119	105.161	100.613	115.091	113.392	122.292	121.511	151.629	149.024
areg	0	0	0.126261	0	0	0	0	0	0	0	0	0	0	0	0	0	0.40616	0.441404
arel1	42.3289	43.5981	50.599	50.3422	61.8734	60.9374	61.831	62.7718	73.6988	73.5899	63.8811	66.7504	76.5113	80.8789	70.012	71.2042	23.5088	23.389
arf1	781.52	809.545	793.118	791.2	736.39	723.848	693.9	705.069	666.536	659.034	622.005	624.927	609.521	608.121	631.463	669.631	704.224	731.727
arf11l.2	0	0	0	0	0	0	0	0	0	0	0	0	0	0	0	0	0	0
arf3	26.4499	26.9549	26.5386	25.62	29.224	30.2313	28.2353	26.1279	48.9496	49.7592	28.7367	29.6626	24.7198	24.014	9.40621	11.9105	8.81363	8.62292
arf4	246.265	235.232	227.875	217.239	244.442	270.033	264.117	268.204	313.102	306.735	348.291	338.481	365.623	356.056	445.18	491.057	688.192	685.561
arf5	347.614	364.176	402.6	415.833	460.572	462.846	471.968	503.127	562.742	568.034	593.639	577.94	593.54	584.218	608.251	613.161	456.935	461.251
arf6	240.742	239.605	240.538	244.051	251.836	233.78	226.375	236.699	219.759	214.577	213.56	222.232	211.287	231.613	136.568	150.424	82.2119	84.7494
arf6.2	65.2848	66.1127	77.5841	79.3072	87.7141	91.9819	109.964	98.3784	177.297	180.422	149.901	154.622	155.707	160.735	134.734	121.759	64.8673	58.946
arfgap1	213.139	223.849	249.694	249.036	242.979	265.102	264.135	256.315	288.441	284.828	272.81	270.266	288.854	269.067	224.091	223.309	164.11	152.927
arfgap2	198.169	201.157	226.579	221.788	211.45	221.3	222.958	224.599	200.241	201.499	269.879	273.49	316.527	298.357	314.625	333.98	138.968	135.782
arfgap3	22.6791	20.7628	19.4916	17.704	21.8923	20.1434	23.5814	16.6384	19.7849	19.8677	41.244	43.1614	34.3621	31.262	26.3286	30.3134	30.0881	27.2873
arfgef1	30.395	31.6571	31.5298	29.2484	33.8699	34.8139	34.015	29.9339	51.979	52.6112	48.6758	47.9203	52.1366	50.9135	30.6222	39.1513	7.29805	7.05702
arfgef2	18.3944	22.6092	22.9504	23.8817	34.0729	35.0117	39.0558	39.2135	71.2146	73.327	73.2632	72.5739	76.4919	74.6794	47.6824	59.8603	95.1697	98.009
arfgef3	0.177445	0.240664	0.079767	0.0630317	0.20192	0.258501	0.411615	0.249391	0.159333	0.159508	0.339587	0.397887	0.488817	0.301515	0.398648	0.394852	0.274925	0.305421
arfip1	32.4654	33.8495	33.4102	33.5013	47.3182	46.1936	50.9951	47.7612	62.4389	64.8421	61.8607	64.133	62.6866	68.1684	45.0114	44.1355	16.2637	13.4537
arfip2	1.33696	1.23632	2.14644	1.36537	2.09187	2.15793	3.32283	2.55303	4.23923	4.13121	5.90984	6.92444	8.44017	7.9782	15.7133	24.4044	36.6813	37.2692
arfrp1	7.89247	5.92995	10.6912	9.46197	14.0329	15.1887	20.4739	16.8422	31.6417	31.427	35.7085	33.5433	40.7659	33.5272	32.7843	36.0166	14.712	14.5352
arg1	0.260694	0.060268	0	0	0	0.064735	0	0.119476	0	0.043939	0	0	0	0	1.3015	0.543843	1.3127	0.585274
arg2	0.478467	0.934067	1.38269	1.35968	0.604957	0.792078	0.211407	0.925854	0.214814	0.21505	0.597176	0.0777444	0.406808	0.129049	0.19906	0	1.31789	1.13386
arglu1	199.831	207.353	191.392	191.555	183.65	169.329	170.173	176.351	134.575	130.311	182.795	185.651	177.466	168.89	240.371	254.764	345.344	358.836
arhgap1	115.656	119.618	131.899	128.886	116.284	121.624	118.255	117.242	87.5998	90.2874	149.004	145.382	143.256	140.69	67.5951	73.1299	38.4623	39.9669
arhgap10	164.434	174.109	158.987	160.44	141.481	136.062	128.521	131.709	102.191	106.413	109.96	107.646	108.723	113.957	67.9002	71.9813	11.8206	9.7692
arhgap11a.1	123.712	131.021	154.483	152.47	189.918	197.867	207.366	204.985	210.912	210.855	206.036	225.45	185.619	192.742	126.097	153.925	96.1954	99.9591
arhgap11a.2	279.323	275.953	236.238	236.381	170.296	163.075	112.496	117.884	106.778	107.542	70.9472	69.9181	50.0805	52.0456	5.86413	7.24758	1.79424	1.78279
arhgap12	14.5496	13.1456	14.2299	12.9735	19.6396	21.5669	24.3903	24.3249	34.5442	36.7091	37.9865	42.4455	53.2249	53.698	30.5284	37.0888	50.778	57.4133
arhgap15	0	0	0	0	0	0	0	0	0	0	0	0	0	0	0	0	0	0
arhgap17	4.62916	3.44319	5.86479	5.01352	8.04463	9.72079	12.1555	10.723	21.6868	20.252	32.6564	31.4197	44.9715	42.9631	37.0841	61.3538	73.554	61.5092
arhgap18	3.69979	2.76517	3.0269	3.72666	4.2101	5.58785	7.50743	7.20055	15.8712	14.6585	19.0402	19.4185	23.5021	17.2238	16.257	14.4849	5.26112	5.80299
arhgap19	101.26	102.607	111.747	115.95	135.757	136.129	137.887	142.45	178.92	182.323	156.959	161.914	152.734	164.599	83.2723	91.2927	33.9628	35.016
arhgap20	36.9452	34.8867	44.5299	44.6594	50.4073	50.8913	52.6723	51.4909	75.0439	73.252	76.5368	77.245	33.4045	32.571	2.75294	4.2179	0.533965	0.670568
arhgap21	145.396	148.82	150.211	157.944	192.848	202.417	192.469	186.582	222.033	226.338	244.045	246.382	236.724	241.923	63.5269	94.613	54.0461	56.0412
arhgap22	0.95691	1.50951	1.35555	1.67956	1.60132	1.06229	1.7907	1.70261	2.5398	2.88413	3.86398	1.97557	2.67051	2.66443	3.51274	2.7008	5.66872	5.74992
arhgap23	4.16604	3.7917	3.89912	4.42555	6.02676	6.80094	7.7999	7.33603	19.3029	18.8988	24.7516	24.8498	24.5377	23.9899	6.28226	10.9116	36.1827	35.3762
arhgap24	0	0.0832445	0	0.0959305	0	0.119219	0	0.0825126	0	0	0	0.0438812	0	0.109259	0	0	0.232455	0.0336835
arhgap25	2.15399	1.86737	2.63684	1.91284	2.65534	2.9418	2.14138	3.16718	8.76398	7.98701	6.66498	6.95612	7.76051	6.80814	3.58455	3.74459	0.20858	0.554105
arhgap26	121.071	127.773	124.439	125.212	120.118	116.087	110.523	103.825	99.068	99.9989	106.863	109.947	101.781	100.615	64.6706	68.0385	1.27427	1.65545
arhgap27	0.130117	0.0601618	0.0313349	0.13866	0.185081	0.0969314	0.194034	0.119266	0.197161	0.219308	0.0812	0.0951405	0.0995671	0.0394814	4.42543	4.88596	14.263	15.4459
arhgap28	0	0.065414	0.0170352	0.0565371	0.0201238	0.0175656	0.0527434	0.0648389	0	0	0	0	0	0	0.0220724	0.0737849	1.69878	1.86604
arhgap29	336.181	353.212	310.807	306.612	279.015	273.736	242.506	241.487	210.582	212.813	155.64	166.011	72.6382	81.7078	11.3007	15.1939	28.1594	31.3608
arhgap30	0.0805563	0	0	0	0	0	0	0	0	0	0.0670284	0.19634	0.205475	0.293317	0.0670288	0.392119	0.208017	0.331565
arhgap31	2.34392	1.84985	2.86125	2.75621	4.1158	4.93729	5.76526	5.53779	8.47765	7.83307	11.3992	10.4604	11.1017	9.6627	1.79059	5.1005	1.84709	1.54238
arhgap32	19.4768	20.0994	24.0878	22.8186	33.4618	30.1112	32.9518	33.3658	43.6362	44.3269	54.6039	54.1767	54.3855	54.1675	12.8319	21.4171	21.2235	19.9371
arhgap33	10.1994	10.571	9.29878	9.29893	16.1735	16.5524	18.9662	16.4157	35.6011	36.6421	50.2697	48.7212	40.5688	39.1725	4.09009	9.24756	16.5109	15.6695
arhgap35	16.5314	14.8822	19.062	18.8671	30.9076	29.2223	34.8192	33.3391	51.2542	51.6765	69.1552	66.8402	62.7675	63.5515	22.1193	29.153	49.2723	49.9309
arhgap36	0.671082	1.70657	5.06378	5.24437	1.2091	1.8886	1.22312	3.17809	4.9713	8.03068	27.9891	26.5789	21.311	20.7698	31.6188	34.7658	69.6626	73.8243
arhgap39	0.645626	0.667269	0.475585	0.485657	0.69146	0.829893	0.830627	0.731023	1.09977	0.896146	1.56422	1.44399	2.20864	1.47502	1.42202	2.21836	2.82438	2.85631
arhgap4	0	0.0872346	0.113589	0.0753965	0.0536733	0.0234251	0.0234458	0	0.0317648	0.0317996	0	0	0	0.085872	0.264917	0.245995	1.68082	1.56194
arhgap40	24.4614	22.0249	24.2309	24.1149	30.6526	28.7725	31.3085	28.7755	34.1139	35.9874	42.7053	43.882	25.0079	24.7009	2.90472	4.23525	0.997348	1.27844
arhgap42	1.14762	1.41498	1.33224	1.1916	2.27696	2.30901	2.74986	2.10381	2.19967	2.75756	2.31378	2.2807	2.29674	1.82146	0.330543	0.36832	5.1974	5.41718
arhgap44	0.976015	1.22611	1.49009	1.51108	2.347	2.30472	2.80106	2.61633	4.53904	4.59368	5.63115	5.97852	5.74938	4.89488	2.78112	3.57278	1.99723	2.43927
arhgap45	45.4747	49.29	55.0585	50.7946	52.6775	50.8836	46.0215	46.3937	58.83	61.5529	86.5755	81.0229	93.9111	83.9775	80.0874	84.2646	70.0037	63.4067
arhgap5	12.2074	12.8632	16.5097	16.0018	25.0393	26.3153	35.9682	36.872	47.9112	48.0682	55.1204	59.215	46.2999	50.1929	51.8085	62.5584	104.641	106.15
arhgap6	1.89026	2.48101	2.20264	2.46922	4.33666	4.2699	6.06194	4.47127	11.2721	12.0656	15.1068	13.6431	12.7847	11.4712	2.93005	3.75254	26.4998	25.1545
arhgap8	144.864	127.838	149.749	141.252	134.106	131.263	115.45	107.537	99.52	101.326	122.796	115.993	134.765	109.77	152.545	132.871	86.3726	81.3073
arhgap9	0	0.108581	0	0	0	0.0777525	0	0	0	0	0	0.057237	0	0.0950088	0	0.163301	0.060641	0
arhgdia	26.0529	29.3598	30.4008	31.6891	32.4122	29.6876	33.5271	31.1555	39.6685	42.0677	42.8974	41.6537	37.9538	39.042	21.757	26.7788	12.9451	15.6031
arhgdib	0	0	0	0	0	0	0	0	0	0	0	0	0	0	0	0	4.66138	3.81776
arhgdig	36.0786	33.7545	49.6016	49.2775	52.0413	58.7168	67.5251	66.7602	86.7503	87.3594	86.7827	91.402	100.969	106.286	112.575	107.243	120.851	114.463
arhgef1	124.341	128.285	127.001	122.57	130.398	140.473	137.963	131.755	132.465	138.465	143.939	143.01	147.057	132.794	108.856	120.589	82.2283	81.329
arhgef10	3.03069	2.47669	4.41306	3.63025	5.21317	7.02403	5.90914	7.42936	16.1065	16.0609	16.5966	16.4569	19.7035	20.0744	9.26601	12.8899	3.67641	4.37783
arhgef10l	0.156149	0.144396	0.100277	0.277334	0.266529	0.258497	0.336342	0.405524	0.806208	0.403547	0.747077	0.380581	1.23469	0.663321	0.552191	0.325747	0.887074	1.25619
arhgef11	21.7989	18.3127	17.3015	17.668	22.8622	24.3206	25.6966	21.2297	42.2707	42.5629	33.2906	36.9575	35.5346	35.3778	15.2563	29.1027	38.5905	36.3603
arhgef12	80.7418	83.5165	84.212	86.1821	94.2991	94.8407	90.0641	87.7594	108.549	109.876	103.778	104.377	65.2827	68.5326	7.82536	14.0917	17.1731	13.5104
arhgef16	156.029	157.661	152.45	151.64	155.73	155.313	157.943	160.676	148.306	146.964	187.831	188.37	179.49	181.469	87.6374	100.482	38.2373	36.5605
arhgef17	45.0172	47.6107	40.1822	37.7171	52.2263	54.5468	56.4158	53.6455	70.002	73.3051	61.6831	63.9588	41.9658	41.2741	3.47531	10.9328	16.0098	14.3684
arhgef18	27.6333	28.7782	29.2388	29.8043	41.7941	44.7388	44.1959	45.7477	60.8074	64.2785	47.0244	49.5899	36.6547	35.3167	3.88246	5.20887	5.8569	4.49395
arhgef19	0	0	0	0.0356153	0	0	0	0.0306337	0	0	0.125139	0.244371	0.102296	0.0405636	6.17355	9.0637	26.9261	30.163
arhgef2	11.4464	9.46362	10.9865	11.0153	15.0362	17.452	18.2438	16.3875	28.5367	29.0668	32.2659	32.967	39.5014	34.6692	63.6345	86.7691	72.4023	70.3806
arhgef25	0.080016	0.061661	0.0513852	0.0142116	0.0758771	0.10597	0.0928057	0.0244475	0.0628674	0.0719274	0.149802	0.17552	0.163277	0.0323722	0.0665792	0.166924	5.59944	4.8503
arhgef26	68.3062	72.6832	62.7297	59.999	61.6183	59.8198	59.1983	53.2559	43.7958	44.9773	61.9153	58.312	51.6818	52.2269	16.1599	18.6426	6.71721	7.68082
arhgef28	0.074498	0.248006	0.34446	0.539846	0.186502	0.399582	0.222186	0.341424	0.42143	0.67302	0.0371925	0.0435777	0.205224	0.126587	0.111578	0.12433	7.66412	6.32214
arhgef3.1	2.74102	2.3446	2.8384	3.72425	3.97684	4.83257	3.13373	5.08765	4.01489	5.45146	9.06585	6.8143	10.4873	5.82193	4.3619	5.57518	2.01723	1.23075
arhgef3.2	1.56244	1.14293	1.41521	1.86383	3.55588	2.59426	4.31213	4.16814	9.25007	9.103	9.40114	11.5608	10.4213	9.05721	10.1288	10.3621	37.1424	42.6167
arhgef33	0	0	0.028352	0	0	0	0	0	0	0	0	0.0430418	0.0450444	0	0.110206	0.0614006	0	0.0991174
arhgef37	10.8936	10.1819	10.5312	9.86122	14.1289	15.0088	16.303	14.6734	14.7513	14.3727	12.0369	11.1913	10.4572	8.43535	4.43466	4.47993	2.48027	3.68166
arhgef38	0.154297	0	0.0297262	0.0328855	0.105347	0	0.0306788	0.169714	0.0415642	0.0208049	0	0	0	0.0374545	4.85301	6.56644	21.0373	24.6641
arhgef39	9.03023	7.81179	9.30661	9.10574	10.994	12.538	12.7904	13.2167	78.9923	74.7913	37.993	39.0489	34.9959	36.7695	22.0567	18.6357	1.27875	3.26991
arhgef4	0.0777145	0.155707	0.124768	0.124225	0.103172	0.205844	0.103013	0.201827	0.436137	0.314363	0.43648	0.492474	0.336984	0.157205	0	0.0540409	0.0602035	0.116316
arhgef40	0	0	0	0	0	0	0	0	0	0.0102567	0.0189881	0	0.814909	0.553948	1.57602	2.2851	23.4297	23.3452
arhgef5	11.9568	10.8539	12.0989	11.3195	17.0595	17.5784	16.7397	15.2328	24.6861	27.4002	45.5685	45.9057	45.3554	42.3825	44.2225	52.671	15.3244	12.6625
arhgef6	4.5361	5.40892	4.86782	6.0636	7.69737	7.46977	8.18841	9.22738	13.6931	12.957	9.33655	10.4739	9.74335	9.22419	1.98651	3.15431	0	0
arhgef7	13.9355	13.2291	15.4753	15.8865	23.4703	23.6597	30.0553	26.8833	49.0286	52.6407	54.3747	59.6136	47.1181	48.7183	9.01435	11.5899	27.6881	27.2844
arhgef9	0.0163098	0	0.0157109	0.0695226	0.0185594	0.0162001	0.0162144	0.0149496	0.0549189	0.0439833	0.0203564	0.0238512	0.0249609	0.079182	0.040713	0	0.303236	0.347857
arid1a	75.5518	67.4677	56.7105	53.8355	92.7936	98.8317	89.4007	89.9204	163.466	166.873	149.166	154.996	198.735	180.067	125.147	255.188	129.467	128.769
arid1b	0.898779	1.0878	1.26047	1.33809	1.77477	2.15306	1.69506	1.84148	2.58133	2.5307	5.88929	5.60534	6.06842	6.86601	3.16737	4.43927	1.55635	1.58754
arid2	39.9592	41.4191	41.9859	42.4544	55.798	55.4319	52.9223	52.1326	71.9231	76.7609	74.3872	73.4021	85.7082	88.9425	109.872	144.774	108.431	112.806
arid3a	13.3425	11.6124	13.643	14.1044	18.877	19.9145	24.8146	22.3558	44.4307	43.5896	32.8158	33.0935	39.4197	39.2438	38.0405	49.2681	55.3838	52.3807
arid3b	195.933	232.716	192.193	186.58	235.92	220.666	212.682	204.18	231.724	241.127	167.228	166.066	171.371	170.344	163.323	200.301	178.993	184.303
arid3c	0	0	0	0	0	0	0	0	0	0	0	0	0	0	0	0	1.58134	1.86177
arid4a	28.241	28.0498	28.9571	27.7098	30.2795	32.6638	33.2541	32.9419	52.1959	51.9994	52.741	59.8989	43.0925	41.7666	25.5613	32.7303	41.6809	46.284
arid4b	40.6069	41.1599	40.3691	41.2784	53.6104	54.3677	52.7592	49.9618	59.7196	63.9094	46.0949	46.9654	28.4004	30.1141	3.44717	5.52363	1.98044	1.69109
arid5b	21.4721	20.8336	23.6608	25.3087	32.424	33.9033	35.5774	34.7156	34.4892	34.3808	27.6453	31.44	22.9448	21.9149	3.82367	6.16478	1.42816	1.61296
arih1	8.30248	6.42408	6.77349	6.86139	9.25483	10.0137	10.8227	10.095	17.8863	17.9345	12.9001	12.9467	15.429	17.7887	19.6146	21.2966	62.0858	60.436
arih2	2.28191	2.30199	3.79675	5.58192	5.07528	7.10874	9.28046	11.0284	11.0366	9.58021	11.2628	10.8453	21.1124	19.6389	40.7793	47.7119	22.4182	23.8687
arl1	119.445	126.599	109.316	111.291	114.236	108.173	109.009	109.874	88.1108	97.3226	87.8268	77.8404	83.5801	80.2387	89.289	102.825	179.949	190.724
arl10	0.55325	0.204643	0.319761	0.235829	0.251824	0.549527	0.44001	0.709952	1.04323	2.31255	2.62395	1.77993	2.70945	1.74587	9.80534	9.46405	26.2296	24.3447
arl10b	143.417	148.794	166.254	164.459	190.445	196.471	211.146	214.637	246.66	241.587	187.516	185.471	158.645	167.423	27.0286	31.5383	10.1923	11.6959
arl11	0.23175	0.428612	0.297653	0.0823217	0.263715	0.46038	0.307191	0.0708073	0.416189	0.364565	1.15699	0.677812	0.118225	0.281278	0.0964165	0	0.598436	0.433577
arl11l.1	0	0	0	0.108615	0	0	0	0	0.27456	0.618438	0	0	0.311972	0	0	0	0.157915	0.114412
arl13a	18.8458	17.7815	19.6297	19.3483	16.4762	17.0449	17.06	21.6277	2.16686	1.96264	19.9837	18.9333	13.3658	17.2945	10.6134	8.15063	1.54302	1.20394
arl13b	11.9781	12.7254	13.4053	14.5821	22.8052	21.6003	24.4325	24.7296	19.4224	20.2539	29.2224	28.2871	25.3912	30.7226	17.1271	23.8557	16.0358	16.3177
arl14	0	0	0	0	0	0	0	0	0	0	0	0	0	0	0	0	0	0
arl14ep	60.675	50.736	58.2397	53.7293	63.4126	59.4831	65.6674	62.583	67.6191	70.3044	101.509	115.894	91.7605	102.194	55.7674	44.1371	41.4474	45.0038
arl14epl	0	0	0	0	0	0	0	0	0	0	0	0	3.03255	2.13778	0.824386	1.83721	0	0
arl15	26.4777	23.6111	24.1753	23.5693	27.9244	29.3313	28.6347	27.3781	37.8812	37.9555	30.4164	30.3599	29.2143	29.99	13.0011	16.5253	2.81495	2.69211
arl16	87.8244	85.2553	71.9697	67.0879	67.2568	63.7713	61.138	64.0946	49.0538	47.7046	56.4953	55.999	57.1712	55.9491	37.0144	40.1593	12.5753	14.6009
arl2	17.2619	17.7671	24.1468	26.5531	34.8447	40.5534	52.9749	56.1346	71.2659	74.0765	65.758	68.0475	65.7003	63.5819	14.4256	9.39408	3.48844	1.68496
arl2bp	92.692	86.9396	91.1379	99.2715	110.299	104.563	115.779	113.606	115.081	111.056	92.8819	100.114	99.4016	105.912	58.1755	52.7618	34.467	40.728
arl3	27.3141	26.2481	29.8109	29.6951	29.3096	29.7402	30.6695	30.418	33.5777	33.6145	32.7142	33.8239	36.2416	36.1832	31.2164	29.5732	14.3242	13.3641
arl3l2	0	0	0	0	0	0	0	0	0	0	0	0	0	0.158926	5.72003	4.09742	7.10059	5.1445
arl4a	50.1972	46.3756	59.2697	61.7763	79.82	84.1843	75.9725	70.6901	75.8091	75.8924	76.6193	81.0768	79.331	83.7153	154.642	177.591	146.405	166.941
arl4c	0	0.0876826	0.0456689	0.20209	0.053949	0.188363	0.0471324	0	0	0.159815	0.236689	0.62398	2.17671	1.55363	103.552	102.563	68.386	63.1177
arl5a	1.67139	1.25318	1.78407	2.31065	2.51876	3.05107	4.62556	4.26475	3.80267	4.02003	6.822	4.0957	4.83932	5.37303	8.06242	9.14092	13.9977	15.7194
arl5b	30.0259	33.7639	32.9127	31.3157	27.9645	25.5287	26.3081	24.9817	24.4659	22.9325	39.5658	40.5692	37.7031	35.5928	24.3249	26.2368	8.72851	10.2892
arl5c	710.984	740.41	733.344	725.862	593.813	588.471	590.218	582.02	489.536	482.775	422.932	430.984	429.232	417.203	165.225	189.57	56.9249	66.9334
arl6	48.9718	45.0177	55.3615	53.4222	55.8363	55.55	62.9931	65.1622	52.7547	56.1337	56.6613	59.0438	48.7823	47.5971	16.7574	19.3442	14.6661	15.1797
arl6ip1	184.694	179.702	157.541	170.402	105.352	114.132	59.5693	70.2148	51.0344	43.7239	20.2363	17.3533	24.9935	28.0921	21.7028	19.608	32.2199	41.0166
arl6ip4	17.9727	15.8613	18.0311	17.8016	16.9723	16.7406	18.683	19.4814	21.0934	20.1613	15.2648	14.1775	20.3154	19.3698	24.0142	23.025	31.0812	25.6999
arl6ip5	7.63718	7.06234	9.75568	9.2507	11.8213	11.4494	14.8784	14.6744	22.266	21.9706	53.314	48.8706	47.7687	47.6134	27.9153	28.2524	9.00312	7.16189
arl6ip6	84.6403	92.7944	126.375	118.818	181.423	173.8	213.032	217.824	316.353	315.384	311.637	326.935	334.3	344.439	94.8732	109.508	39.5934	41.5674
arl8a	0	0.104377	0	0	0	0	0	0	0	0.0760969	0	0	0	0	0	0.470935	2.79807	2.91417
arl8b	56.1556	62.164	54.1249	50.4064	40.8967	41.6796	36.5707	35.568	46.3897	46.8796	25.8411	26.9927	30.64	25.9194	5.68833	7.47031	16.6444	17.0655
arl9	14.0693	13.4273	22.5878	24.7	48.3375	49.0008	82.6666	93.0821	120.076	121.242	93.9907	103.796	94.4092	100.815	57.2953	52.304	28.3657	27.8406
armc1	40.9159	41.9461	43.7466	43.4012	43.862	44.3594	48.1744	47.8978	60.8414	61.2532	70.4653	69.6821	65.875	72.8393	54.5639	61.98	40.3144	42.5428
armc10	71.8735	76.5941	60.8207	66.5746	60.3084	55.1415	49.892	51.4279	51.4935	51.1508	70.3972	67.3287	71.5941	73.848	50.9967	44.1629	8.25718	10.4693
armc2	0.652423	0.630739	0.714166	0.60045	0.269968	0.471297	0.235857	0.434917	0.219686	0.35988	0.0740265	0.260206	0.181542	0.467915	0.259094	0.618656	2.15951	2.13052
armc3	0	0	0	0	0	0	0	0	0	0	0	0	0	0	0.421791	0.302141	8.45228	7.96638
armc4	0	0.102585	0.0712409	0.118218	0.0420787	0.0734589	0.0735238	0.101683	0	0.0498604	0.138458	0.162229	0.113185	0	0.230765	0.385708	16.2137	14.1547
armc5	0.579894	0.750745	0.484121	0.700363	0.967822	0.652791	1.9601	1.24024	3.56681	3.54467	4.43911	4.63587	5.79821	4.55141	4.48739	6.29063	19.5864	20.4398
armc6	32.1255	28.1003	34.3448	31.0918	32.4813	30.6538	36.4401	32.4391	44.1206	44.4887	56.2657	56.0674	48.44	45.3832	27.6729	28.4552	30.8433	30.0909
armc7	21.7209	21.3413	27.7233	24.0149	29.3512	30.8338	31.9408	31.5231	33.0954	31.3013	37.7279	33.617	32.5495	30.9765	17.9604	18.6915	16.4059	14.3246
armc8	8.07554	8.65126	8.42481	8.15109	10.6805	8.83845	9.69453	10.307	10.2407	10.2519	13.0458	11.0965	14.4576	11.8357	7.68299	6.92938	2.69123	2.29192
armc9	53.8764	51.6324	40.8314	39.8438	35.76	39.0538	29.6432	30.0372	25.2582	26.7246	45.6073	45.4857	37.849	36.3676	14.6309	16.2217	12.9989	10.107
armh1	0.190394	0.457763	0.440166	0.527524	0.693294	0.226935	0.492126	0.279224	0.12822	0.359409	0.285157	0.556855	0.233105	0.2773	0.66537	0.238312	0.589973	0.812145
armh3	5.53241	5.27731	5.64134	5.57696	7.28802	8.4408	8.54735	9.02274	13.5101	13.2057	12.1304	12.2086	14.8362	17.6641	11.1974	15.4405	6.56387	5.9865
armh4	2.74427	3.88121	3.0478	3.02766	2.82888	3.3351	3.40224	3.344	0.369623	0.174131	11.9275	12.7949	11.9573	12.6177	7.77712	6.93726	11.3549	13.4094
armt1	45.8916	48.6117	49.6656	48.1757	59.5598	51.7295	57.8626	59.2602	49.8567	50.702	56.4644	59.109	40.6745	41.7844	5.48794	5.2998	1.21111	2.19367
arnt	49.8416	48.5672	71.1474	68.5414	87.2321	88.609	92.4275	91.2869	118.169	116.31	99.0587	102.113	91.0644	94.3203	74.7922	87.4632	96.9474	91.4235
arnt2	0.0752265	0	0.0362321	0.0400827	0.214006	0.0373601	0.0373931	0.103429	0.303965	0.177508	0	0.220019	0.172692	0.136955	0.140837	0.235399	0.874142	0.84444
arntl	24.5003	23.4653	23.0106	23.1716	24.1457	26.2475	25.7923	27.2291	21.5968	19.2019	27.8487	31.0942	30.0635	26.338	19.1119	17.7063	4.13488	6.23714
arntl2	5.02748	4.548	6.42207	6.11461	9.76288	12.1585	14.4509	16.0786	30.6188	30.3945	38.7402	35.8814	51.4337	50.6063	46.3112	53.694	20.828	19.8749
arpc1a	143.088	131.27	143.231	152.617	163.398	154.256	173.981	179.912	177.802	179.652	152.897	146.097	158.097	157.089	129.484	125.941	44.963	44.5188
arpc1b	23.0092	25.1903	27.1746	27.9958	28.9917	27.0574	35.6702	30.4636	44.527	42.8523	32.0187	33.3902	34.674	36.8074	35.98	34.9426	22.9466	22.8597
arpc2	50.3181	48.9192	64.3201	60.6558	75.2198	77.5348	86.1624	77.8631	127.107	120.023	170.617	155.422	177.879	165.684	237.002	218.322	225.137	208.431
arpc3	26.0418	21.904	26.2864	28.6372	37.0421	36.048	47.6474	42.1532	57.5572	66.1187	60.1647	61.5809	75.4697	76.3282	142.979	130.037	141.217	141.965
arpc4	164.295	166.994	170.958	175.081	183.102	166.28	175.072	175.174	147.566	150.937	165.188	168.384	140.078	156.415	100.187	105.018	50.201	57.2285
arpc5	36.5583	34.2687	41.6812	43.9044	55.1697	56.2414	58.9175	71.6654	74.1003	73.7485	76.5525	75.4942	71.9037	78.9497	61.1354	64.6468	54.7609	56.1864
arpc5l	7.19389	7.65801	13.94	10.7862	13.8022	16.3681	22.5365	25.839	37.4055	36.6007	75.5883	80.6141	92.0459	93.6081	82.8971	75.0371	77.7618	76.5281
arpin	22.8809	23.1688	23.3265	22.9608	28.0764	27.0451	28.7371	29.9909	29.5854	29.2065	35.84	34.3529	36.8266	36.3799	17.7535	23.6277	6.20385	6.33552
arpp19	199.915	195.87	198.75	205.599	242.406	239.401	261.994	269.377	262.498	271.624	288.906	303.811	280.984	299.019	287.308	303.497	333.139	376.283
arr3	0.0873828	0	0	0	0	0	0	0	0	0	0	0	0	0	0.109063	0	0.135387	0
arrb1	0.854658	0.82469	1.68234	1.78194	2.45249	2.4729	3.21392	1.94142	3.40334	3.15656	1.34497	1.4672	1.08051	1.26281	0.32465	0.232556	0.403007	0.208561
arrb2	244.201	234.518	245.728	243.289	213.206	224.075	213.51	194.002	226.064	226.541	188.54	181.674	189.04	176.405	133.562	145.039	44.5553	46.7506
arrdc1	66.6594	71.882	53.7554	48.2889	61.8436	64.6912	45.4108	55.4241	44.2536	45.481	52.6465	59.5541	47.3849	46.8633	26.0052	40.4263	9.70708	7.36005
arrdc2	2.4216	2.06708	1.79437	2.42179	3.34913	2.40531	3.74078	2.25379	3.86378	3.06428	3.62689	4.08612	7.07004	6.55654	2.18545	2.95335	3.52103	4.43296
arrdc3	18.003	17.834	15.1405	16.5011	16.373	16.4921	17.0399	13.851	19.411	20.0455	13.2431	14.5277	15.9174	16.1615	5.61744	6.37296	30.6028	28.0359
arrdc4	30.0066	32.3727	29.75	32.0702	28.4545	27.626	29.831	25.6544	22.1577	20.6441	23.8725	25.4048	16.7846	11.0749	1.64262	1.09821	0.407814	0.196979
arsa.1	3.42408	4.12362	4.96031	5.06318	6.88659	7.11845	7.91638	8.53967	9.50972	10.576	12.092	12.5377	12.6742	13.1119	3.5448	3.48849	2.34411	2.56242
arsa.2	0	0	0	0	0	0	0	0	0	0	0	0	0	0	0	0	0	0
arsb	3.62214	3.18477	3.03154	2.34128	3.37847	3.5093	3.92562	3.70104	4.53872	5.26429	5.70659	5.9482	6.08864	5.87367	4.74317	5.20268	1.33399	1.3331
arsd	0.124628	0	0.0600258	0.332026	0	0	0	0.228468	0.461615	0.672177	2.17768	2.36929	1.4305	2.04205	1.94437	1.55994	0.193092	0.419696
arsg	0.434105	0.229388	0.238951	0.396519	0.211706	0.24639	0.246608	0.3979	0.417636	0.459905	1.23842	0.816204	1.32872	0.301074	0.696614	1.16434	0.576497	0.556909
arsh	0	0	0	0	0	0	0	0	0.0386138	0	0.572507	0	0.0877506	0	0.143128	0	0	0.128727
arsi	0.273137	0.210481	0.613916	0.485115	0.259008	0.497381	0.814615	0.792797	0.919712	1.41177	2.15905	2.796	3.41378	3.64661	1.07953	0.379866	0.141061	0.306604
arsj	0	0	0	0	0	0	0	0	0	0	0	0	0	0	0	0.115564	0	0.0932757
arsk	0	0	0.0306257	0.101642	0.0361783	0.189475	0.0316071	0.0582832	1.71287	1.52185	1.58724	1.90624	1.41105	2.93268	0.714265	0.663248	0.295552	0.0713775
art1	0	0	0	0	0	0	0	0	0	0	0	0	0	0	0	0	0	0
art5	109.572	104.743	111.246	112.669	104.83	97.6724	102.316	114.666	66.123	62.7064	62.3806	58.6019	49.7869	46.1246	42.8178	45.0378	24.0559	22.2426
art5l1	0	0	0	0	0.167882	0	0.29334	0	0.496778	0.298394	0	0.431499	0	0.179063	0.736552	0.615548	0.685742	0.331221
artn	0.0269641	0.374019	0.25974	0.201141	0	0.187479	0.134032	0.197723	0.544766	0.527185	0.706735	0.315454	1.23799	1.21089	0.403851	0.337505	1.67108	2.1793
arv1	63.6355	52.6443	57.2263	54.142	55.2427	59.4424	53.4802	56.7916	43.6404	41.8209	40.94	41.786	38.1524	36.0078	11.5543	13.2296	1.35524	2.61838
arvcf	24.8498	23.2619	31.5035	31.0395	47.8193	55.2702	60.4193	60.3388	99.7752	102.683	132.434	132.607	158.688	159.239	62.8726	75.715	41.2623	40.0842
arx	0	0	0	0	0	0	0	0	0	0	0	0	0.476411	0.440794	1.2951	1.94821	3.77805	2.91198
as3mt.2	0	0	0	0	0	0	0	0	0	0	0	0	0	0	0	0	0	0
asah1	77.216	75.1314	66.3723	65.6405	72.8875	66.0615	65.2432	66.2733	55.6908	56.6012	48.5012	52.1306	38.7483	42.2726	32.544	35.475	10.8315	7.42342
asah2	0	0	0	0	0	0	0	0	0	0	0.12807	0	0	0.0622706	0.128071	0	0	0
asap1	26.5755	30.0241	30.3615	28.6996	36.2262	39.0254	36.8779	36.8468	43.7041	45.1919	66.486	65.0037	60.4325	61.6542	11.1057	20.295	10.3243	9.98832
asap2	70.6061	78.138	64.9231	65.0772	76.2704	82.2224	73.8378	70.2572	66.8198	69.9636	105.641	98.8965	92.4072	78.1516	7.11429	10.6362	10.2959	8.8421
asap3	0.050151	0.0695643	0.0724642	0.0801655	0	0.099627	0	0	0.0337739	0	0.0625936	0.183349	0.076752	0	0.031297	0.104622	0.233104	0.084444
asb1	0.856598	0.990152	2.06286	1.02694	2.19318	1.91437	2.92732	2.94434	3.02857	3.6455	6.88247	5.7936	5.32574	5.9131	3.74195	4.35576	1.99075	3.90632
asb10	0	0	0	0	0	0	0	0	0	0	0	0	0	0	0	0	0	0
asb11	0	0	0.0672574	0.0744053	0	0	0.208238	0.0639982	0.141062	0.141217	1.04573	0.714736	0.213711	0.677945	0.261434	0.145656	0	0.0783765
asb12	8.17872	6.84961	9.21623	9.62014	11.9408	11.3425	15.1111	12.7301	16.6796	17.0101	13.0006	11.8475	11.6903	12.1742	11.9414	9.17479	13.9867	12.2123
asb12.2	0	0.134737	0	0	0	0	0	0	0	0	0.27278	0	0	0.176843	0	0	7.56249	7.36005
asb13	2.5673	1.41434	2.99921	1.1642	2.42415	2.92982	3.04101	2.25305	4.00966	3.05658	1.84074	2.23665	1.83913	2.3867	0.88629	0.341856	0.592416	0.306582
asb14	0	0.147302	0	0	0.120842	0.10548	0	0.0486691	0	0.0357975	0	0.155297	0.568829	0.257781	0	0	0.329066	0.655638
asb15	0.0644584	0.0596067	0	0	0	0	0	0.118165	0	0	0.0804508	0.37705	0	0	0.241354	0	0	0
asb16	0	0	0	0	0	0	0	0	0	0.0345758	0.192028	0	0	0	0	0.106988	0.158918	0
asb18	0.057034	0	0.329639	0.182336	0.194702	0.283251	0.170101	0.627329	0.115228	0.115354	0.355922	0.250216	0.0872859	0.484562	0.569479	0.237961	0	0
asb2	0.130743	0.161202	0.125942	0.20899	0.0743879	0.108219	0.0433259	0.159785	0.0586987	0.0293816	0.135984	0.0637318	0.0333485	0	0.0543938	0	10.4997	11.4475
asb3	8.77815	6.52923	8.50177	8.84608	13.4633	14.1211	14.6079	15.3487	17.9276	17.6899	14.5882	14.2323	14.8945	14.1863	4.10854	6.56857	0.813069	0.803294
asb4	1.36185	1.15859	1.39055	1.27711	1.20875	1.54206	1.21849	1.24827	2.67801	2.00153	1.66573	2.11103	2.25093	1.61984	0.135979	0.397739	0.126599	0.21402
asb5	1.38899	1.51798	1.82453	1.61474	1.43688	1.19151	1.94576	1.85185	1.148	1.31952	0.630401	1.01561	1.54599	0.919548	0.236402	0.790259	1.46729	0.992207
asb6	7.89697	8.28351	11.1266	9.54587	20.856	17.3852	25.0755	26.6307	48.5779	48.2737	60.4613	57.397	63.134	60.8698	31.1135	33.44	38.9882	35.9876
asb7	91.078	86.2615	89.0406	86.7554	72.5675	77.1003	63.7356	68.1952	59.0135	55.3049	39.585	39.767	34.1763	37.671	33.5875	41.5148	34.2487	34.3966
asb8	1.82027	1.4637	2.97321	1.85544	4.05262	5.10962	6.53036	7.32671	20.9994	19.7952	13.8289	11.3421	15.7457	13.64	9.08759	11.392	3.18809	3.8201
asb9	0.0714423	0	0.068819	0	0	0	0	0	0	0	0.0891674	0	0	0	0.356672	0.149038	30.993	31.1963
ascc1	3.69714	3.64183	4.7227	4.02552	5.57896	5.34873	9.02896	8.39833	15.8591	15.2804	11.9373	12.5763	15.4985	16.4859	13.6427	9.55708	4.23386	7.03721
ascc2	14.4711	12.372	15.2548	15.8577	20.1438	23.8659	31.1254	31.0751	38.6756	38.626	39.758	38.1986	46.3831	47.334	44.1884	42.7199	6.34553	6.53858
ascc3	13.0367	13.9128	12.8575	14.4864	19.9813	19.8482	22.4423	20.2997	25.0032	25.8431	32.3481	32.2922	30.8594	29.7582	17.5975	22.4653	1.18459	1.45468
ascl1	1.60274	1.28	1.33336	1.39743	1.4093	1.08542	2.31762	0.868088	0.735925	0.785849	0.54556	0.532685	1.00344	1.68001	1.81854	2.88759	3.49906	3.10758
ascl2	0	0	0	0	0	0	0	0	0	0	0	0	0	0.193415	0.596689	0.664883	4.44422	6.6187
ascl3	0	0	0	0	0	0.0391132	0	0	0	0	0	0	0	0	0	0	0	0.0884064
asf1a	0.851502	0.52494	2.27843	1.10905	1.9379	1.59757	1.50492	1.82114	4.5238	4.08227	6.14041	3.32058	4.92303	6.54538	1.88937	1.77635	1.17269	0.318612
asf1b	113.789	101.105	116.784	109.467	120.297	133.07	126.684	129.688	127.718	127.342	85.1253	83.5574	54.2138	64.8724	44.4739	45.4432	44.4252	40.6241
asgr1	0	0	0	0	0	0	0	0	0	0	0.104607	0.245132	0.256537	0.305174	0.313823	0.524533	0	0.0940822
ash1l	1.07126	0.635959	0.777129	0.789251	2.49824	2.87688	4.01016	3.30943	14.3486	13.8115	20.782	21.12	18.8439	18.3634	4.30828	15.3401	12.1511	9.29358
ash2l	643.785	634.407	659.715	653.712	602.084	597.758	580.428	566.912	482.388	483.491	652.531	652.294	656.816	659.969	641.502	619.097	175.628	183.333
asic1	0.496014	0.840912	1.1945	1.20399	0.846643	0.903239	1.1232	1.23765	0.927883	0.7617	0.240752	0.120893	0.421727	0.167228	0.240753	0.0574862	1.75047	1.85597
asic2	0.969017	0.486443	0.746748	0.885117	0.661603	0.522498	0.743153	0.558298	0.298322	0.186656	0.518328	0.283414	0.550829	0.168016	0.310999	0.115514	0.300269	0.0932357
asic4	0	0	0	0	0	0	0	0	0.248989	0.249262	0	0	0	0	0.051273	0	0.063648	0.368912
asic5	28.6832	31.4361	26.9948	29.2	22.1348	24.7788	23.3075	25.3173	13.9632	14.102	20.1172	20.5175	16.034	16.5841	6.17238	6.26645	2.27026	1.97381
asip	0	0	0	0	0	0	0	0	0	0	0	0	0	0	0	0	0	0
asl	13.1224	21.6181	13.9152	17.7443	15.3088	13.3627	16.0055	15.0603	5.49541	5.35276	18.9931	20.3187	55.5229	54.6064	48.5841	61.6515	16.0599	17.4535
asmt	0.154131	0.57012	0.148472	0.739128	0.613867	0.153094	0.383073	0.565107	0.467095	0.311739	0.384744	0.112699	0.117943	0.187072	0.0961865	0	0	0
asmtl	64.1432	62.5192	70.2153	74.5853	77.1303	89.0929	86.0714	94.5223	70.9642	73.4073	64.6512	63.21	60.1191	64.2893	43.5696	42.6461	5.09986	3.93802
asns	8.97301	10.6132	11.8597	11.3411	8.07353	6.83992	8.50559	8.09715	14.2405	14.0685	5.64303	7.42559	4.89684	6.41621	3.7331	5.07877	3.01756	3.51365
asnsd1	433.503	448.168	397.305	404.349	350.665	335.706	325.135	310.637	282.574	287.08	266.948	273.681	246.74	259.002	200.415	188.434	64.9008	59.9618
aspa	0.641385	1.28507	2.05945	2.50615	2.18955	2.4421	2.55053	5.09508	3.52749	3.31516	1.33419	1.2506	2.45397	1.68666	2.80182	3.12204	1.32497	2.15992
aspdh	0	0	0	0	0	0	0	0	0	0	0	0	0	0	0	0	0.39994	0
aspg	32.8678	33.7846	33.0942	31.0899	30.8401	27.3682	29.1886	26.1568	27.2165	28.142	40.2928	37.5351	30.0101	30.2819	16.1835	17.2386	48.042	51.152
asph	115.447	124.455	111.495	113.92	103.919	102.942	94.3769	97.7016	81.0131	83.0337	78.3918	82.4184	78.4516	76.8341	55.7446	55.2416	27.7679	27.5948
asphd2	14.5168	13.4967	19.4639	19.442	25.2252	25.9155	28.5127	28.7341	33.4772	33.6462	43.2886	42.3435	33.5054	35.3815	5.33765	5.81127	1.82365	2.68657
aspm	13.8827	13.7059	20.6528	18.8835	35.3741	38.5936	50.2592	46.2311	83.5423	87.0123	97.4296	99.4493	83.2072	84.1911	10.5457	21.984	33.291	35.5277
aspn	0	0	0	0	0	0	0	0	0	0	0	0	0	0	0	0	0	0
aspscr1	44.4186	50.3062	48.648	45.7612	45.4369	46.8771	48.1517	46.1823	45.268	43.1673	46.0025	50.4451	43.0293	43.3013	42.9065	38.815	14.8256	14.4544
asrgl1	3.93078	4.40595	6.50196	7.36222	6.91273	8.55796	28.6965	12.3374	28.6909	29.2043	72.3017	73.9148	75.9562	58.8404	44.0553	55.0816	7.93565	8.73569
ass1	0	0	0	0	0	0	0.0699036	0	0	0.0474053	0	0.102827	0.107612	0.0853425	0.263283	0.146687	0.326828	0.394654
aste1	74.9797	76.3871	66.3717	71.188	71.3004	63.828	64.3238	60.8763	61.2113	61.2413	59.0321	53.7335	50.5679	50.297	26.9646	24.0909	1.36973	2.23287
astl	0.607648	0.59703	0.841419	0.809429	1.21006	1.62206	1.51023	1.28799	3.22259	2.99569	2.51222	2.99906	3.89419	4.65554	3.64986	2.69372	0.411889	0.383683
astl2a	0	0	0	0	0	0	0	0	0	0	0	0	0	0.0918381	0	0.157851	0.351704	0.0849384
astl2b	0.121181	0.112059	0	0	0	0	0	0	0	0	0	0	0.185457	0.220618	0.604988	0.252799	0.375502	0.204043
astl2c	0	0	0	0	0	0	0	0	0	0	0.721538	0.375739	16.9085	13.4095	159.862	154.369	289.209	378.19
astl2d.1	0	0	0	0	0	0	0	0	0	0	0.639587	1.3489	30.8214	27.9884	294.532	302.002	298.37	338.987
astl2d.2	0	0	0	0	0.0875387	0	0	0	0	0	0	0	0.117732	0	0.19203	0	15.0178	47.8401
astl2d.3	0	0.0680589	0	0	0	0	0	0	0	0	0	0	0.112637	0.267983	0	0	1.93851	5.53531
astl2d.4	0.665495	1.29235	0.833376	1.20562	1.21166	0.661017	0.860081	0.304996	0.17927	0.0897333	2.57488	2.14105	2.24067	1.69622	3.32245	8.60753	221.889	218.882
astl2d.5	0.647441	0.92109	0.575692	1.1676	0.736742	0.74202	1.33682	1.04994	0.268317	0.201459	1.61615	2.40342	2.21037	1.08804	0.248639	0.623376	2.70069	1.84488
astl2f	0.0629514	0	0	0	0	0	0	0	0	0	0	0	0	0	0.0785703	0	12.2892	9.61041
astl2g	6.93265	7.62552	7.02956	5.91025	7.5567	5.9437	5.51366	5.95313	4.32474	4.23109	0	0	0	0.0885712	0	0	2.03516	0.409584
astl3a.1	0	0	0	0	0.080672	0	0	0.0649811	0.047743	0	0.176965	0	0	0	0	0	0	0
astl3a.3	0	0	0	0	0	0	0	0	0	0	0	0	0	0	0	0	0	0
astl3b.2	0	0	0	0	0	0	0	0	0	0	0	0	0	0	0.174635	0.097297	0	0
astl3b.4	0	0	0	0	0	0	0	0	0	0	0	0	0	0	0.0887265	0.296601	0	0
astl3c	0	0	0	0	0	0	0	0	0.0378744	0	0	0.246732	0.0860705	0	0	0	0.871352	0.820702
astn1	0	0.114639	0.0796121	0.110091	0	0	0	0.0189385	0	0	0	0	0.0316211	0.0250775	0	0.0431031	0	0.208741
astn2	0.0539395	0.174578	0.233815	0.172443	0.184138	0.294671	0.268119	0.0741615	0.163464	0.109096	0.201966	0.15776	0.206375	0.196402	0.0336613	0.281313	0.0835712	0.0605488
asxl1	173.67	169.972	198.276	196.754	221.986	239.536	248.664	234.905	275.732	280.228	329.684	318.344	315.696	301.999	411.389	414.559	275.146	265.154
asxl2	2.07854	1.84064	1.86647	2.04606	2.06456	2.60693	2.34656	2.26039	3.81974	4.63147	2.55026	2.6017	1.34789	1.90275	0.307792	0.734933	0.818741	0.672283
asxl3	7.58484	8.25392	8.78534	8.1919	10.1452	10.7669	11.0105	10.2924	13.3042	13.8708	12.1112	12.3493	8.72557	9.67793	7.3843	12.8121	17.9683	19.6827
asz1	7.1628	2.74083	2.7956	2.03987	3.58352	3.80263	3.92876	1.81115	3.53464	4.74579	2.69739	2.97988	2.64602	3.52241	1.77258	1.41697	0	0.346571
atad1	59.8697	58.5101	67.6417	66.0291	75.5089	78.0216	80.6277	75.3131	106.085	110.216	106.4	97.2456	109.148	115.343	66.5393	66.4782	43.1119	51.2099
atad2	191.542	197.974	270.628	266.265	310.782	338.433	345.037	346.738	403.367	400.686	384.166	402.286	375.672	404.105	281.751	293.072	96.7804	106.654
atad2b	187.14	187.549	159.254	153.882	154.486	159.972	135.562	119.948	171.767	178.136	185.794	185.661	155.229	143.816	58.3792	81.4107	34.2525	33.8273
atad3a	107.761	99.7073	100.048	102.568	110.651	115.151	120.36	116.929	140.641	137.582	127.931	120.838	110.736	107.878	39.7854	37.7041	16.9741	16.1889
atad5	250.882	272.961	256.405	255.144	261.799	273.6	238.066	235.94	229.523	232.165	193.544	197.803	170.846	172.319	53.7683	64.5681	64.3722	65.3885
atat1	22.4702	14.1614	23.782	21.0476	9.20174	20.2576	13.3747	12.5938	3.51804	4.10085	3.12604	3.45343	3.83314	2.95306	0.893161	1.34357	15.3005	10.2018
atcay	0	0.158451	0.165056	0.182598	0	0.0850974	0.127759	0.196322	0.0576967	0	0	0	0	0	0	0	0.663695	0.577029
ate1	3.14218	2.71617	4.4415	4.54956	8.35596	10.313	12.7668	11.4266	27.8311	27.5623	29.8821	31.616	34.6028	35.8572	8.56825	9.33375	9.36625	8.62628
atf1	803.788	847.86	829.427	827.634	809.107	829.707	778.326	766.77	618.055	651.927	601.872	582.257	599.761	610.098	553.319	568.336	124.467	117.442
atf2	10.5306	11.0193	10.0226	9.85279	9.05897	8.13257	8.29002	8.28993	12.0458	11.3797	8.20668	7.1104	8.63644	8.31692	6.32013	5.83367	3.90325	4.21367
atf3	0.573123	0.728728	1.38019	1.37419	0.407608	0.142316	0.0712211	0.59099	0.241229	0.241494	3.12951	3.56202	2.19279	1.13036	2.14596	1.94287	5.99378	5.62929
atf4	3.08131	2.36092	3.64661	2.62689	2.40433	2.62335	3.85098	4.76102	6.46244	8.13144	14.3943	13.7756	64.9419	65.6075	160.096	146.559	322.998	305.369
atf5	78.9125	89.4816	73.008	74.3478	62.9388	60.7579	60.5394	57.7244	60.7773	63.7238	61.0357	55.9782	49.4475	48.4536	22.8971	29.3601	3.98776	5.10221
atf5.2	69.0456	66.4779	64.8048	68.7192	69.5949	66.1297	64.8548	63.4839	72.2224	71.1443	91.5996	90.144	48.4417	47.6634	6.76288	6.2674	1.66241	1.74644
atf6	33.8556	41.3056	42.8648	41.4793	39.9863	41.3803	38.2593	40.2301	46.8285	45.4448	48.4122	49.7567	51.7615	53.6398	54.6117	58.8561	60.7777	62.0503
atf6b	173.563	187.832	178.964	183.517	155.004	158.803	138.511	146.892	123.532	126.221	65.0075	66.3208	37.9935	37.7461	6.88558	6.37496	8.75695	8.86417
atf7	10.4376	8.74826	14.7991	13.7058	16.2368	17.2402	20.7531	20.4242	30.4861	32.3645	36.1055	35.0438	23.9909	26.2381	1.51254	2.365	11.205	10.444
atf7ip	123.987	121.568	109.766	107.643	122.076	124.373	106.799	103.806	84.3543	80.6779	48.9752	48.2478	30.9827	35.5973	14.8539	22.6184	57.8761	66.2737
atf7ip2	39.0376	43.1987	36.6634	37.9002	32.4753	34.6791	30.3407	31.4801	39.0052	38.9566	28.7123	32.8879	20.3852	19.9202	4.97729	6.678	4.62343	5.57277
atg10	0.368465	0.170365	0.177468	0.490821	0.104822	0.457482	0.641041	0.337735	0.620352	0.248413	0.574853	1.61651	0.845859	0.335409	0.689828	0.576501	0.713602	0.62042
atg101	18.7216	18.3673	20.6196	19.5217	29.7032	28.3266	32.3542	34.4434	29.9156	31.5318	31.1552	29.0462	29.5761	29.6453	24.9579	22.8175	11.7481	9.34023
atg12	8.15389	8.36957	8.71847	11.6436	11.4126	10.6907	10.8623	12.855	17.2423	16.6016	15.5706	15.6205	11.9797	13.3603	4.57963	5.44323	17.6865	20.3196
atg13	4.41151	4.37085	4.76987	5.37273	6.9665	9.74731	11.0985	9.49005	14.6423	16.0241	17.3046	16.1941	23.2856	20.8709	9.77605	15.0253	6.55599	6.87223
atg14	50.0376	51.2681	55.5087	56.0836	56.5602	56.3546	54.0128	56.9574	50.8953	50.2775	49.7492	50.7671	32.9083	35.5315	1.61674	1.69857	1.08949	1.24635
atg16l1	21.1763	22.6821	24.9089	23.4738	36.9327	37.5226	38.2433	34.4311	41.7799	42.1127	28.7544	29.1781	114.244	102.356	257.264	295.583	49.6264	61.6971
atg16l2	0.173825	0.160742	0.0837212	0.138928	0	0.129492	0.21601	0.0398321	0.526778	0.351571	0.922046	0.889695	0.864583	1.00213	4.55602	5.16738	11.3786	10.5367
atg2a	2.06478	1.52008	2.04689	2.07217	3.99199	3.48451	4.5239	4.77738	8.43759	8.43334	10.4083	10.8174	12.0263	12.4086	11.3591	17.5642	7.1746	6.88582
atg2b	13.3849	13.3815	14.1622	14.6051	18.6945	17.5909	19.7298	17.7993	24.1053	23.1837	24.5477	23.8686	21.8465	20.1988	8.73059	12.2533	13.0164	12.028
atg3	64.6196	60.8171	73.1924	72.7761	86.0709	86.5297	90.828	95.3155	89.8954	91.6965	97.1261	83.5882	85.8963	77.3153	80.7957	71.8322	29.342	28.345
atg4a	41.8419	45.8022	44.8902	40.9661	35.6503	37.8199	30.7818	32.7912	30.8551	28.0328	26.9601	31.1297	23.373	22.8529	3.06812	2.2913	0.243104	0.58711
atg4b	31.4111	31.7171	30.9389	27.884	30.2446	27.0436	25.6028	27.2249	21.233	19.1108	24.8612	21.6316	23.9007	21.6013	13.534	13.2777	2.28268	3.24153
atg4c	171.048	178.112	181.701	188.733	184.373	190.261	190.134	195.726	215.378	218.413	202.595	227.341	204.338	221.794	124.878	126.896	14.3729	15.5013
atg4d	131.642	128.293	144.019	134.204	119.343	129.935	109.451	105.455	130.97	119.473	123.402	125.43	119.375	122.463	95.0588	91.8538	37.2209	33.3718
atg5	13.5801	15.637	17.5152	16.872	22.5854	21.303	22.4902	25.0446	22.7317	23.1968	22.8164	22.1506	19.5842	19.0973	9.37108	8.85307	3.03466	2.8949
atg7	3.43369	3.09873	3.30761	2.99784	5.50787	7.88954	7.77313	7.12887	8.66454	7.89311	11.7725	10.4057	12.1561	13.0047	14.3543	18.1236	7.56336	7.29089
atg9a	7.11254	7.97989	11.0401	10.1659	9.09087	7.9352	10.1205	8.21871	13.7795	14.7491	13.2527	13.9012	12.6907	13.3785	7.82543	7.38369	0.835625	0.79462
atg9b	1.63494	1.25686	2.16312	1.97319	3.47433	3.52179	5.34611	4.82076	9.10018	9.32266	18.5127	17.5141	21.1024	21.015	5.94967	7.84873	15.5953	14.6822
atic	12.1033	9.16886	10.4733	9.76458	15.4068	13.5841	21.4818	17.9885	43.1493	41.2143	25.4331	27.2995	37.3603	33.9447	44.1241	41.0834	39.0938	34.9254
atl1	0.71224	0.299377	0.686086	0.724501	0.994678	0.610977	1.19085	0.86056	2.89973	2.64099	6.86915	6.81751	7.2338	7.97657	2.74768	2.7015	0.250797	0.654145
atl2	142.683	134.39	146.551	154.177	155.01	159.428	142.754	145.611	152.75	159.76	135.268	137.688	115.621	114.908	37.5656	45.689	7.32409	6.71823
atl3	16.0665	16.0559	16.6685	18.2307	21.4786	21.6745	24.8765	21.8558	30.7005	33.4223	36.4527	36.5068	30.2396	33.136	12.3553	15.1604	3.53001	3.72609
atm	7.7613	8.35544	7.41431	7.44789	11.9076	11.5061	11.8873	10.2404	13.4701	13.5456	17.3336	18.239	15.3646	14.8877	4.4499	7.19605	1.43582	1.44482
atmin	26.206	25.8026	31.0855	28.7972	40.5832	39.3878	45.6703	45.5928	56.6481	60.1634	53.6895	51.1894	30.4884	33.828	17.4521	21.6317	11.0512	11.7457
atn1	2.03223	1.09201	1.32271	1.19989	3.2188	2.42773	4.01338	2.9955	7.00944	6.46169	12.6136	12.7711	10.8015	7.56632	2.67356	8.36444	8.3822	7.89187
atoh1	7.29009	8.69281	12.5048	10.4946	7.1313	8.76545	9.28179	8.73361	4.04816	3.92327	9.97673	10.1933	12.0377	8.14956	2.55406	4.53575	0.49539	0.502486
atoh7	0	0	0	0	0	0	0	0	0	0	0	0	0	0	0	0.774742	0	0
atoh8	0	0.141016	0	0	0.043382	0	0	0.0698883	0.0770225	0.128512	0	0	0	0	0	0	2.18547	2.05416
atox1	1.91584	1.69781	2.30686	2.55202	4.26934	3.64731	4.36477	4.68282	11.6657	8.44939	8.76759	8.17156	8.79609	9.10735	14.8452	11.657	22.3859	21.0578
atp10a	24.3786	26.1067	26.085	25.8833	29.3597	28.4888	29.2657	27.9401	35.903	38.6979	27.3484	27.4885	21.4103	21.9839	8.24726	8.6765	2.67801	2.9306
atp10b	67.1537	69.0631	57.6741	55.645	58.1193	54.8256	49.5871	46.9131	55.4157	55.7894	36.8179	39.3025	28.5678	27.2912	9.95626	14.1469	7.85242	11.0779
atp10d	153.511	158.73	139.473	132.603	161.169	154.149	120.89	108.746	116.687	124.746	70.6247	71.6753	64.7083	63.6512	10.2191	18.127	17.9253	16.7471
atp11a	0.0160406	0.0148332	0	0	0	0	0	0	0.0108025	0.032443	0.760772	1.19633	0.957404	1.14865	0.620634	1.53929	0.571608	0.720242
atp11b	136.143	140.147	135.877	132.788	137.726	143.047	135.767	121.415	132.249	139.709	133.804	135.63	132.534	130.139	72.6949	83.8077	26.4144	25.9387
atp11c	22.1959	22.6453	23.6088	23.6747	29.2283	28.2131	28.0363	29.1409	33.1472	32.021	36.287	35.5147	34.4968	33.5143	16.3837	20.3583	18.6091	21.2488
atp12a	0	0	0	0	0	0	0	0	0	0	0	0	0	0	0	0	1.99737	1.26624
atp12a-like	0	0	0	0.0400827	0	0	0	0	0.0506609	0.0253583	2.11253	3.30029	67.5801	61.2647	157.972	161.797	117.718	108.215
atp13a-like	10.9942	11.1463	12.9899	12.3567	17.1369	16.9491	22.4575	17.8977	22.8675	24.4368	20.4756	20.6414	21.8209	18.73	13.8292	13.8568	145.897	165.676
atp13a1	115.89	120.218	127.82	124.844	137.618	134.57	141.391	133.588	119.461	119.458	116.295	114.845	103.672	108.697	57.2359	57.6351	32.7726	34.2931
atp13a2	2.99884	2.77312	3.70661	3.36899	7.19496	6.69301	9.62633	9.17349	19.5386	18.7805	24.5315	25.4408	29.6934	29.4468	14.2726	17.072	33.4474	31.4728
atp13a3	4.84886	5.11321	5.79754	5.98308	8.05869	7.68907	9.23926	9.82461	17.4157	17.6642	20.8365	21.7391	22.0345	24.2375	8.38774	11.3132	6.98538	7.92576
atp13a4	214.078	217.006	176.855	174.934	110.299	107.546	64.2077	59.727	45.4792	47.0361	39.7764	40.2162	43.2277	44.6819	21.1353	23.386	2.41375	2.8133
atp13a5	0.081866	0.0252347	0.0525733	0	0	0.0542101	0.027129	0.125064	0.0918871	0.0367952	0.170295	0.0399064	0.250578	0.0662414	0.272474	0.284639	32.0057	35.9624
atp13a5l.1	1.04307	1.21347	0.615823	0.645414	1.11036	1.57078	0.602106	1.0486	1.47287	1.45181	1.55382	2.80469	1.13288	1.87856	4.36753	4.49233	12.8765	13.5972
atp13a5l.2	0	0	0	0	0	0	0	0	0	0	0.0842978	0	0.103366	0	0	0	0.104644	0.151633
atp13a5l.3	0	0	0	0	0	0.0327557	0	0	0.0222086	0	0	0	0	0	0	0	0	0.0370183
atp1a1	718.139	688.079	699.648	686.554	682.594	716.216	681.523	646.006	480.937	467.281	608.32	584.738	523.675	473.857	750.73	838.752	2433.67	2308.39
atp1a2	0.176604	0.489935	0.408287	0.0752797	0.723468	0.0701664	0.245799	0.259001	0.237867	0.16669	0.132252	0.0516525	0	0.171478	0	0	1.53228	1.98244
atp1a3	0	0	0	0.0412101	0	0	0	0	0	0	0.0965313	0	0.414282	0.140807	0.24133	0.0806733	0.359491	0.434096
atp1b1	118.023	115.029	119.444	127.093	98.0006	101.442	97.1606	106.992	131.066	126.004	232.564	238.45	238.418	230.672	116.283	146.387	614.507	605.227
atp1b2	0.0942663	0.087171	0	0	0	0	0.0937147	0	0.0634832	0.0635529	12.236	11.1661	125.801	105.488	1195.26	939.997	314.887	283.589
atp1b3	328.988	314.495	280.272	282.98	266.077	250.053	235.385	228.515	207.899	212.212	141.456	146.3	152.077	161.353	316.204	317.88	662.111	740.203
atp1b4	0	0	0	0	0	0	0	0.0650346	0	0	0	0	0	0	0	0	1.48405	1.3938
atp23	151.006	149.254	138.253	140.21	123.955	124.798	127.13	128.169	119.167	120.673	102.482	117.661	89.6747	99.1871	27.1671	32.0289	11.2915	11.9987
atp2a1	0	0	0	0	0	0	0	0	0	0	0	0.050185	0	0	0.0428319	0	332.789	276.59
atp2a2	59.7551	57.8496	65.3243	57.9013	79.9592	86.7261	86.5569	80.8442	103.471	105.669	79.7515	82.1698	121.324	114.405	157.008	201.326	278.16	289.918
atp2a3	51.0378	59.8866	47.4011	49.6996	54.2105	55.8438	45.6501	45.4036	45.4761	45.8051	34.2563	38.6721	31.8371	35.877	18.6508	24.0391	15.3898	16.0895
atp2b1	77.357	86.7709	93.414	93.4935	105.415	107.233	112.989	105.457	120.665	122.97	134.39	134.672	124.375	129.999	81.1457	95.0844	28.668	30.6438
atp2b2	0	0.0758923	0	0	0	0	0	0.075225	0.0138173	0.027665	0.0256078	0.0300042	0	0	0.025608	0	0.127155	0.16122
atp2b3	0	0	0	0.019527	0.0417028	0.0546021	0	0	0.0123402	0.0123538	0.0228702	0	0	0	0	0.0764526	0.340683	0.2674
atp2c1	35.6896	39.0564	49.1764	48.1632	64.6053	69.788	86.1021	89.7876	137.431	137.981	142.911	150.995	151.98	157.858	69.9165	76.5119	24.7174	20.7883
atp2c2	1.5006	3.01814	4.04739	4.67743	1.49413	1.7886	1.6783	2.64774	1.08636	1.54281	1.0301	1.31667	1.60758	1.18385	0.32776	0.62609	0	0.0421117
atp4a	0.14416	0	0.347165	0.0384061	0.205054	0.250582	0.179145	0.0330342	0.0728127	0.242975	0.314871	0.316224	0.220625	0.437422	0.179927	0	0.0558385	0
atp4b	0.0703151	0	0.0677331	0	0.0800136	0.0698419	0	0	0.0473533	0.0474053	0.175521	0.102827	0	0.170685	0	0	0	0.0789308
atp5f1a	14.6677	14.9608	13.7652	15.6977	19.771	20.6967	28.7256	20.5416	79.6164	76.6906	41.4848	41.2423	73.6052	66.8544	157.298	149.579	312.986	281.67
atp5f1b	202.607	203.19	252.893	252.481	320.108	342.89	412.997	395.855	531.518	524.305	599.57	565.452	689.449	661.526	733.229	754.156	494.949	464.644
atp5f1c	345.817	325.634	327.75	347.166	385.954	376.167	381.933	388.386	327.141	330.607	291.444	286.786	322.27	313.069	319.4	298.002	292.551	312.163
atp5f1d	11.5509	9.47224	13.4361	16.2575	25.0482	22.9463	28.8166	26.1692	56.0667	52.0141	10.8805	12.1111	25.0156	21.6905	56.3071	48.1934	93.1962	79.0205
atp5f1e	4.18359	4.07782	3.15863	2.65086	6.17596	4.49237	6.96932	3.93832	18.5036	17.9903	15.5235	14.0549	30.1098	28.6821	78.0416	63.4516	71.1252	75.5201
atp5if1	12.712	15.4287	15.5617	12.9822	15.6709	16.3092	29.4879	28.4014	46.5497	55.3496	18.1797	19.7517	34.4511	27.6433	64.1253	52.4856	38.9805	39.2416
atp5mc1	22.3709	16.3253	15.1885	17.0899	17.9422	23.8267	26.9291	25.1991	43.7446	45.0646	38.3496	29.3644	38.1555	37.4566	46.7599	56.5085	57.6281	49.6189
atp5mc3	241.485	213.797	286.321	281.485	327.885	324.995	411.382	443.1	623.503	592.833	360.747	341.589	363.641	353.341	376.75	330.56	499.322	467.519
atp5md	4.29902	6.70854	6.21173	3.14962	9.17245	10.4083	10.1504	12.5603	31.4847	34.9611	18.1089	7.07264	19.7379	26.0889	52.6504	49.8863	57.0321	47.0513
atp5me	8.69591	9.7051	8.08774	11.1841	8.18923	9.82875	11.328	13.4677	25.6462	27.0895	23.9523	18.8558	39.9251	23.2924	49.7762	31.2773	28.3398	35.0065
atp5mf	4.09355	4.3262	2.81659	5.29709	2.99454	2.61386	4.65096	5.62822	9.64872	6.89951	6.56893	0.855188	14.7671	12.7759	53.6466	40.2585	97.8532	85.9946
atp5mg	42.1702	36.014	43.0112	42.2954	62.6649	63.8151	73.2426	66.3925	93.2164	84.288	47.679	39.5405	57.3249	51.7847	82.6648	74.0005	107.997	114.723
atp5pb	4.59451	2.46698	2.99812	5.52792	9.44454	5.74129	12.9662	7.87926	28.047	30.276	19.0531	19.5065	31.0748	26.9827	96.9309	82.5526	179.111	157.386
atp5pd	22.7819	16.1449	16.6128	16.5632	18.1711	24.1089	30.4803	27.5172	50.4719	43.9244	26.5739	28.3339	30.6297	35.4032	52.6167	44.4168	47.8325	44.6936
atp5pf	13.3207	10.4835	10.9205	9.36283	15.4805	13.2311	19.7232	14.288	38.5552	39.5529	21.2242	13.2629	29.9287	20.2954	59.7818	41.3875	87.384	96.7165
atp5po	22.2397	19.7028	25.468	24.86	35.5717	36.1473	45.6106	48.1825	120.97	118.062	69.1025	64.136	96.3958	88.1509	188.48	187.527	151.563	126.046
atp6ap1.2	32.7914	31.8911	40.8297	36.3405	50.6002	50.8655	55.8904	51.3188	48.7336	46.3192	78.0068	80.8617	74.2449	67.2055	48.6704	48.7131	29.9101	29.1101
atp6ap1l	0	0.158398	0.0825007	0.182537	0.0974586	0.255208	0.170289	0.392514	0.288388	0.404186	0.213789	0.375739	0.131074	0.103949	0.21379	0.178668	1.06156	2.21121
atp6ap2	137.26	145.541	149.13	154.174	190.117	198.266	210.402	203.908	139.063	136.206	134.955	124.153	128.54	133.349	85.6578	86.5025	60.1414	66.3369
atp6v0a1	29.3266	29.9216	37.494	37.0046	46.6628	53.0535	55.9563	52.3148	74.6625	76.2982	110.202	111.302	107.35	104.675	47.8714	54.5279	41.3288	35.4714
atp6v0a2	74.0764	79.0962	75.2557	74.3823	85.7771	84.8678	81.4642	81.2517	82.1069	83.9239	70.1619	70.9699	52.6063	58.347	2.48337	4.19849	5.38595	5.51957
atp6v0a4	0	0	0	0	0.0490217	0	0	0	0	0	0	0	0	0	1.0216	0.44935	17.7543	13.3469
atp6v0b	105.018	104.965	111.493	109.246	130.487	134.317	144.21	140.17	148.129	151.606	142.563	151.877	132.817	143.625	125.943	123.059	48.4667	56.1839
atp6v0c	659.582	649.249	720.355	700.475	675.684	656.079	682.711	690.718	864.45	879.064	1005.12	977.102	1047.38	1053.28	944.298	911.089	287.576	262.214
atp6v0d1	104.824	98.2412	92.8363	90.8576	93.2179	91.1637	92.2981	82.5661	112.023	111.518	85.0824	88.8843	80.2861	79.8529	49.7186	59.0421	12.8912	14.3885
atp6v0d2	0	0	0	0	0	0	0	0	0.40766	0.408108	0	0.737691	0.617611	0.734705	9.69592	7.78733	42.986	41.4499
atp6v0e1	389.61	370.035	355.379	369.954	358.894	333.009	324.701	352.284	257.1	264.583	237.231	250.084	229.238	239.227	182.227	172.032	107.24	115.028
atp6v0e2	59.7841	51.6257	54.907	51.6856	51.1893	47.3017	42.3906	45.5308	26.7422	32.1061	57.0598	48.642	38.7955	48.7296	11.8875	13.7556	0.681077	1.48036
atp6v1a	5.21301	3.90241	3.76619	3.70351	5.96734	5.20875	5.89201	5.14799	8.33785	9.05828	11.8896	12.3426	14.674	13.5204	22.3077	26.4755	20.5765	19.7497
atp6v1al	0.0523872	0	0	0	0	0	0.156242	0	0.141119	0.0706372	0	0	0.0801743	0	1.37309	0.65572	28.7328	27.4625
atp6v1b1	0	0	0.148738	0	0	0	0	0.070765	0.0519925	0	0.0963583	0	0	0	0.385436	0.161057	14.5931	13.3462
atp6v1b2	23.1341	22.9312	27.5428	26.4258	32.8323	32.7895	37.6249	35.5001	51.5351	50.6453	69.6215	64.3926	62.1375	66.4413	41.9808	41.8622	74.2632	69.6779
atp6v1c1	113.564	115.843	124.309	121.838	141.313	148.832	168.427	173.703	191.435	189.445	183.822	188.809	194.265	199.724	205.704	215.021	70.182	72.5374
atp6v1c2	0.0980198	0.0906419	0.188841	0.104455	0.11154	0.0973602	0.0974462	0.089845	0.132022	0.0991251	0.367017	0.143342	0.52504	0.178452	0.0611698	0	18.6796	23.9866
atp6v1d	8.21333	5.58464	9.54062	7.85157	12.6448	10.7974	20.173	16.6066	20.3354	22.8821	24.2709	25.6117	31.9791	29.7593	45.3764	50.3944	19.2751	20.3376
atp6v1e1	56.7147	53.6641	59.769	62.4439	66.1078	75.3391	74.4701	72.4565	70.2621	70.6776	99.2096	91.1037	95.0544	93.9634	96.1565	93.5783	69.3052	54.6495
atp6v1f	13.8109	10.8966	12.5714	13.6374	11.5345	14.2213	15.6195	11.6138	13.0553	11.7029	19.6095	16.8615	18.8094	16.1473	18.3445	16.3881	25.7167	25.6014
atp6v1fnb	0	0	0	0	0	0	0	0	0	0	0	0	0	0	0	0	0	0
atp6v1g1	23.9924	18.6367	29.1204	30.8516	40.9525	42.8957	54.3826	51.7532	86.066	88.9642	109	104.322	100.853	118.809	135.951	109.779	67.902	58.8918
atp6v1g2	0	0	0	0	0	0	0	0	0	0	0	0	0	0	0	0	1.88237	2.21618
atp6v1g3	0	0	0	0	0.184061	0	0	0	0	0	0	0.236541	0	0	0.403767	0.337434	25.5621	26.3277
atp6v1h	29.7084	24.8227	35.663	30.775	49.0789	44.2627	55.8458	55.7055	59.6147	59.5785	68.7	66.6009	65.6607	63.238	59.0071	51.2794	26.9864	23.6149
atp7a	2.20954	1.69692	2.90401	2.7936	7.05281	7.12337	13.1424	10.727	26.6201	26.6619	24.3054	24.3434	21.8939	22.9312	3.85617	5.1172	4.3227	4.5822
atp7b	4.15423	4.46164	4.67914	4.0784	4.59694	4.11003	3.73969	3.418	4.31763	4.28929	4.57252	4.73568	3.15383	4.40684	2.30669	3.24133	2.81274	2.33163
atp8a1	92.9316	95.6823	74.5112	72.1405	58.5418	58.5725	33.2487	32.5816	25.0768	24.7963	11.519	13.0289	6.2698	8.355	1.65373	2.44638	2.66636	3.31658
atp8a2	0.0247017	0.137054	0.0475893	0.0263234	0.0562175	0	0	0.0452831	0.0166352	0	0	0	0	0	0.0308304	0	0.191358	0.471382
atp8b1	413.413	450.64	398.156	403.485	384.39	373.052	329.004	336.14	226.834	226.41	291.783	295.771	270.609	271.594	146.483	166.513	83.2454	83.8184
atp8b3	0.0257602	0.0476426	0	0.0274515	0.0293133	0.0255869	0	0.118059	0.0520443	0.0868358	0.0643029	0.226027	0.0788479	0	0	0	0	0
atp8b4	7.11047	7.22487	7.42703	6.68263	9.86542	9.83661	10.4074	10.4436	14.5732	15.4671	10.7778	12.6282	9.33491	10.2105	2.3737	2.64499	1.77858	1.36555
atp9a	16.7372	14.6755	17.9097	18.2873	18.3114	20.9109	18.7241	17.5039	23.0592	24.2944	32.1148	31.583	27.0345	31.4502	8.3811	13.0409	4.81143	3.32751
atp9b	27.8608	38.127	34.0802	32.8884	36.0159	32.401	34.027	29.761	20.3756	23.7296	31.2543	32.2753	29.3228	28.9213	11.8056	12.4591	1.69095	2.31412
atpaf1	4.93908	4.47216	5.25331	4.82474	4.44942	5.82568	7.56985	5.376	13.6513	15.2618	7.19189	7.37327	10.0785	7.99284	10.531	5.5811	12.5945	12.0126
atpaf2	2.9877	2.44706	4.02918	3.09288	6.31389	7.03743	12.39	8.68502	31.158	32.0555	13.9569	15.8537	24.1685	26.9376	68.5066	60.7246	86.4959	84.5152
atpsckmt	11.3381	12.0432	10.3314	10.6947	15.5172	11.4901	14.6228	12.6395	15.8387	16.8374	17.1152	16.6926	17.9383	18.5963	9.65725	14.5433	6.17209	6.62167
atr	4.4926	4.32517	4.0164	4.45964	7.56334	7.96196	9.65151	9.61787	12.9413	13.7128	14.5749	15.9747	11.7732	12.6982	4.91596	7.67105	2.55063	2.83241
atraid	15.0699	10.4795	14.052	14.3891	26.2028	28.9789	36.795	33.0408	40.3513	42.7527	30.094	28.0321	27.4913	30.1428	26.0315	26.4077	28.205	32.4794
atrip	98.8684	99.5928	96.8133	96.7954	86.9842	92.1234	76.876	76.2756	63.6875	65.679	84.3258	74.8197	80.0885	84.838	27.9922	29.1444	17.3741	19.144
atrn	42.4398	37.95	46.0541	41.6877	49.1496	53.9038	52.8167	48.4114	61.1624	60.8273	76.2162	77.9962	79.243	75.3442	29.7873	41.5617	46.3414	38.8458
atrnl1	0.283754	0.322949	0.189232	0.302384	0.223541	0.368566	0.499089	0.420144	0.852568	0.735779	1.55283	2.1067	1.43641	1.11267	0.354157	0.956226	0.473453	0.808558
atrx	161.409	188.504	151.412	151.921	152.167	147.497	123.673	119.298	130.003	133.929	96.8494	104.388	91.5889	97.861	60.1739	91.8065	78.762	83.2068
atxn1	0.826304	1.29739	1.1359	1.33918	1.27329	1.4192	1.5916	1.25443	1.64043	1.68865	1.08503	1.10767	0.566431	0.647705	0.193372	0.161604	0.0533431	0.0676339
atxn10	4.03014	4.06559	5.58794	5.01052	6.32313	6.76267	7.83099	8.7873	11.6787	12.7825	11.6605	13.4392	16.6811	15.2302	13.4516	15.6683	7.52129	7.50564
atxn1l	54.7092	53.2285	51.8303	50.146	52.5734	54.2938	45.9306	42.9578	63.1239	64.9557	56.0025	55.6772	40.8819	43.0945	13.7041	17.2535	10.8256	11.6316
atxn2	191.376	179.411	180.44	177.575	175.671	168.022	166.055	159.915	169.772	170.092	133.434	131.696	87.1926	91.1542	52.6587	62.9781	76.9296	69.655
atxn2l	110.934	99.1442	87.8558	85.4745	117.549	139.581	129.287	138.856	175.552	180.629	254.55	249.631	301.635	270.54	277.076	405.495	137.049	136.579
atxn3	63.9663	61.3485	67.3958	70.1913	81.4399	83.5345	83.254	88.5733	80.7958	79.2027	93.5503	93.1086	84.2607	84.9175	40.6968	39.6485	10.0302	8.93384
atxn7	20.7201	22.0293	23.9077	25.0953	29.9983	34.0882	34.326	33.387	40.9846	41.1922	44.9404	46.6144	38.4756	39.7026	13.2816	18.2758	15.9891	17.3404
atxn7l1	4.37866	5.88316	5.08497	5.96681	6.35412	6.4556	7.1135	7.71931	10.182	10.7178	10.6254	10.1961	8.94269	9.20307	1.75186	2.73716	5.69674	7.00456
atxn7l3	57.5933	56.5586	65.5772	62.3729	76.553	72.0499	83.2455	80.5957	89.2887	89.1762	80.2343	83.1794	77.8324	73.5296	21.9379	25.1276	42.8536	43.7678
auh	19.6613	16.3789	13.7147	16.1657	22.0839	16.667	16.6817	16.3126	11.7569	13.3125	8.35606	6.44447	6.22552	7.50869	7.19261	8.48609	5.77732	4.56629
aunip	13.4866	12.9878	13.0327	13.7312	19.159	20.5203	24.8938	21.0229	109.366	110.181	103.301	111.049	96.43	95.9194	30.6635	36.9157	20.6292	23.7693
aup1	7.82659	7.79422	8.89239	8.82162	19.1824	19.684	27.0333	26.626	58.857	56.351	33.5632	32.869	40.3105	38.3624	70.6335	71.7983	72.8345	64.8782
aurka	916.204	893.022	775.261	762.412	536.594	543.629	358.12	333.111	251.455	258.89	130.409	121.362	170.674	156.939	121.385	120.4	156.738	154.508
aurkaip1	27.3812	20.4812	28.0169	32.421	46.3905	47.0204	62.1847	61.7958	70.8085	70.2299	64.8557	59.6176	71.5173	73.7033	90.0694	66.7679	72.2134	68.8491
aurkb	1065.4	997.614	963.783	966.035	753.997	765.036	562.112	559.423	383.693	372.665	305.382	299.493	286.464	275.971	128.679	120.475	224.281	229.535
auts2	1.84627	1.40602	2.61541	3.0091	3.61483	3.34408	4.07582	3.5588	3.4741	3.16674	11.9622	12.5468	8.43516	9.35885	8.23468	10.9883	38.6591	33.2209
avd	0	0	0	0	0	0	0	0.174207	0	0	0	0	2.90868	2.99879	24.1957	19.8243	2.94466	2.98683
avd.2	2.61496	2.13911	2.03452	2.35793	3.66232	2.79715	5.29929	4.79374	16.3234	16.3413	4.14243	3.97113	4.92551	6.46969	2.25952	2.51776	2.02574	2.70957
aven	3.55528	2.13255	4.53545	4.71027	4.155	4.39033	6.59131	4.84411	7.95937	7.51464	13.432	18.6889	19.2643	14.9279	21.5873	16.6377	5.95499	5.28525
avil	0	0.0380488	0.039635	0	0	0	0.0409051	0	0	0.11096	0.154063	0	0.125941	0.199757	0.102709	0.257507	0.828742	1.24706
avl9	36.3926	43.4128	41.4978	44.0659	46.6405	49.1608	51.1489	47.451	53.7653	56.1552	63.9878	65.2607	56.949	64.7094	36.5647	44.508	20.0871	20.528
avp	0	0	0	0	0	0	0	0	0	0	0	0.266944	1.11746	0	19.8214	30.8452	8.20179	7.37669
avpi1	7.12716	6.65347	5.81929	6.76325	7.9171	8.73101	9.34605	8.83477	14.6507	13.9803	19.697	19.2074	17.2962	20.2253	5.59145	5.80568	18.5619	22.2489
avpr1a	0	0.0466841	0	0	0.0574473	0	0	0.0462737	0.135993	0.170178	0	0	0	0	0	0.315949	0	0
avpr1b	0	0	0	0	0	0	0	0	0	0	0	0	0	0	0	0	0.26081	0
avpr2	0	0	0	0	0	0.0552602	0	0	0	0	0	0	0	0	0.138876	0	22.9285	25.2929
avpr2.2	0	0	0	0	0	0	0	0	0.0588077	0.0588723	0	0	0.133642	0	0.10899	0.364338	0	0
awat1	0	0	0	0	0.0623685	0	0	0	0	0	0	0	0	0.0665223	0	0	0.084918	0
axdnd1	1.32113	0.885722	1.78166	1.72463	2.48052	3.05095	3.28349	2.66408	5.8943	5.14369	7.74984	8.88714	8.13805	8.13761	8.12089	6.95901	13.6118	12.4572
axin1	13.0599	11.4925	15.0706	13.7541	19.5026	20.6943	24.4058	21.958	34.5485	35.2578	33.6279	33.2123	30.3909	31.6787	28.0353	38.3502	21.3617	22.0761
axin2	4.12465	3.50283	4.48674	3.13961	5.97072	7.52491	8.98208	9.23303	14.9279	14.5281	12.7124	12.8432	20.9985	23.328	77.8858	85.4604	142.287	148.13
axl	0.0201213	0	0.0193825	0.0857694	0.0457932	0.0399718	0.0200036	0.0368864	0	0.0406964	0.0251135	0	0.030794	0.0244215	2.48625	3.27411	17.1774	17.2563
azi2	21.5305	22.125	22.3415	21.0521	24.6605	23.7089	24.7384	25.4951	33.7628	34.9018	39.1828	41.665	30.3629	32.8358	9.70783	12.1695	4.3226	4.23899
azin1	498.073	494.056	458.949	471.451	478.868	446.248	443.522	433.157	371.065	379.144	353.583	340.481	336.956	333.899	363.012	379.808	266.805	279.138
azin2	79.9647	78.3027	78.4151	83.6806	61.2833	73.5768	53.4098	75.035	96.5102	96.0426	45.9818	45.8376	39.8584	37.6463	41.1634	41.0899	17.2356	16.1602
b2m	5.62529	6.84804	4.8014	4.62875	5.42884	6.08252	5.02605	5.48247	16.8796	17.6662	17.419	16.6609	14.3847	18.2355	10.8425	14.8546	7.94327	6.47441
b3galnt2	11.5186	11.7168	15.9038	15.3027	20.7971	21.0517	26.6432	21.6791	31.1838	29.3543	31.4365	32.0048	35.0216	37.4673	20.0313	16.6604	10.4699	11.7232
b3galt1	0	0	0	0	0	0	0.0373388	0	0	0	0	0	0.114961	0	0	0	0.0581914	0.337285
b3galt4	8.87191	8.37648	8.22296	10.3681	12.0893	11.5892	15.75	13.8722	30.8779	33.8522	39.5001	41.866	48.4919	47.4153	27.6828	34.0609	23.8528	25.1485
b3galt5.1	0	0	0	0	0	0	0	0	0	0	0	0	0	0	0	0	0	0
b3galt5.2	0	0	0	0	0	0	0	0	0	0	0	0	0	0	1.61599	1.47328	0	0.132126
b3galt5.3	0	0	0	0	0	0	0	0	0	0	0	0	0	0	0	0	0	0
b3galt5.4	0	0	0	0	0	0	0	0	0	0	0	0	0	0	0	0	0	0
b3galt5.5	0	0	0	0	0	0	0	0	0	0	0	0	0	0	0.286849	0	0	0
b3galt5l	0	0	0	0	0	0	0	0	0	0	0	0	0	0	0	0	0	0
b3galt6	23.6772	21.5306	21.3184	18.2211	23.9416	23.819	24.2017	22.1471	36.0963	39.7945	56.076	63.1318	56.7434	54.4942	16.9137	21.503	18.4126	17.8323
b3gat1	0.695122	0.988923	0.875627	0.797741	0.912691	1.32778	2.02	1.32331	3.92506	4.50615	5.53919	4.3789	2.12765	2.98533	0.400426	0.892379	0.497071	0.360136
b3gat1l	0.630777	0.453677	0.472589	0.298751	0.23926	0.904991	0.836114	0.963617	0.330395	0.283507	1.7495	1.74238	1.60892	0.935713	1.48708	1.31588	1.95459	1.65215
b3gat2	0	0	0	0	0	0.0416378	0	0	0	0	0.104641	0	0.064155	0.0508789	0.889452	0.524703	0.324743	0.470564
b3gat3	36.4732	36.4643	38.4485	41.8746	34.4561	34.2455	28.4605	36.5853	17.7964	16.0065	25.9392	22.6434	18.0096	16.5379	5.41118	5.45537	13.6477	15.5272
b3glct	39.5069	31.2598	32.6953	37.4879	36.5121	32.9625	29.508	28.5288	21.0995	24.1799	34.3875	28.4349	24.1848	24.7673	20.7527	23.22	6.17423	6.09299
b3gnt10	0	0.0598455	0	0	0	0	0	0	0	0.0872619	0	0	0	0	0	0	0.501344	0.79911
b3gnt2	258.367	269.735	231.285	230.229	245.184	225.742	206.055	184.163	224.474	226.478	178.791	182.221	153.371	160.834	37.7546	52.0447	42.3113	47.9582
b3gnt3.1	4.14408	5.58586	5.61574	5.68861	6.23428	5.30222	4.74828	3.73408	3.83145	3.36212	4.64625	4.72491	3.65481	2.89849	2.19164	2.49096	0.652946	0.31538
b3gnt3.2	80.487	86.1956	83.8817	86.5338	104.498	102.635	110.193	106.657	125.374	128.026	127.882	136.909	110.431	112.636	49.3673	55.0094	64.3703	64.6498
b3gnt4	7.20036	6.31868	8.56379	8.76925	8.69514	10.363	17.2382	12.0548	33.0527	28.3337	37.8729	41.259	34.5205	37.0078	10.8209	12.4152	2.84589	2.22684
b3gnt5	735.99	758.479	667.75	671.956	616.617	593.219	547.332	553.511	465.085	469.631	436.997	445.991	321.009	335.854	22.8781	22.4594	36.2367	43.9131
b3gnt7	34.9182	33.3191	30.9559	32.615	34.1146	36.1341	42.528	39.9119	51.2001	51.0218	91.0698	103.653	79.414	77.3323	10.1575	10.738	36.9651	38.5721
b3gnt9	1.2938	1.27444	1.5985	1.07901	1.34423	1.25715	1.9573	1.46948	1.62895	1.78244	3.01896	3.61952	2.75485	3.44784	1.96585	1.64289	0.130731	0.0315723
b3gntl1	0.0952389	0.616492	1.00916	0.811934	0.325125	0.662186	1.5149	1.83321	0.513105	0.963128	1.18868	2.36768	2.6236	2.77423	1.66416	2.38417	1.18047	0.962176
b4galnt1	0	0.0163782	0	0.0377482	0	0.0351842	0.0528229	0.0487025	0.0238551	0.0597033	0.0221055	0.155403	0.0542113	0.0859858	0.729486	1.40403	9.30249	9.32439
b4galnt2	0.556346	0.668811	0.750284	0.711447	0.949623	0.884163	1.49334	1.27487	3.14721	3.33821	0.833252	0.569512	2.38404	2.16079	1.80539	2.32122	0.172395	0.374709
b4galnt3	11.183	11.2512	10.2552	10.468	9.10121	8.70843	8.73392	8.74145	6.66352	6.93622	0.0446639	0.0523319	0.0821501	0.0868667	0.111661	0	12.2532	12.7139
b4galnt4	60.4456	66.8892	69.425	69.4443	67.3405	68.9817	60.4178	58.9499	52.8776	52.9062	75.4424	76.1866	58.9959	59.8368	4.17309	6.97503	10.3944	13.4674
b4galt1.1	11.6977	15.1673	14.2891	13.7357	12.0264	12.1174	8.32442	11.2395	13.0099	12.9608	6.06699	5.91617	7.82329	9.82037	3.32708	5.43015	9.03762	8.69534
b4galt1.2	0	0	0	0	0	0	0	0	0	0	0	0	0	0	0	0	0.915717	0.663452
b4galt1l	1.96668	1.03923	1.71404	1.5968	1.17226	1.95345	1.30345	0.600887	3.53187	4.67224	5.96123	6.16293	6.87965	10.571	40.56	42.1998	7.98045	11.4588
b4galt2	1.46373	1.1147	1.13352	1.74335	2.44945	2.62269	4.47964	4.26174	8.67842	8.6299	9.7076	8.10045	11.3324	9.47497	3.40305	4.19114	2.93485	2.93178
b4galt3	66.5026	65.685	66.4486	64.9758	51.0469	54.7381	48.5306	49.202	63.6312	61.9334	87.7621	83.0999	68.6538	64.8615	4.28401	5.56922	6.27817	7.11728
b4galt3l1	57.4707	51.9053	56.3825	55.8872	51.2249	53.6444	57.3009	46.6368	47.7303	49.0253	85.8103	82.1653	72.9959	67.9905	11.8504	15.2631	6.05729	5.70519
b4galt3l2	29.8309	27.9774	28.6539	27.3642	30.5702	33.9653	33.9532	26.4109	54.3044	52.7357	53.7856	59.1156	57.3915	52.9722	88.1623	104.485	179.425	175.422
b4galt4	0.726743	0.522699	0.0777841	0.387229	1.33236	1.00257	0.842905	1.03621	1.68578	1.60598	0.957442	2.30268	1.97728	2.30315	0.655096	1.01072	21.2059	20.6667
b4galt5	5.30245	5.13964	4.24619	4.62939	5.59763	7.0435	6.16057	5.44579	11.6162	11.2413	8.4519	9.34239	6.94171	6.74581	2.71101	7.19671	7.02759	6.88442
b4galt6	28.7954	29.2339	29.2357	27.3377	27.9018	28.0868	30.0759	28.7393	44.5648	47.1687	36.9503	37.2783	32.618	31.4898	20.9009	21.6229	37.789	39.8865
b4galt7	357.341	368.613	345.913	360.271	317.174	304.092	287.304	310.588	278.248	261.061	270.215	285.449	272.688	284.02	169.028	151.527	68.416	72.8531
b4gat1	4.89748	3.69018	5.02342	5.94389	9.93334	8.62552	11.8114	10.9316	25.9885	26.0782	23.1485	23.7738	23.4225	26.1983	13.8383	16.7915	8.8877	10.8933
b9d1	141.588	146.447	152.189	147.971	134.407	127.246	123.985	125.114	102.525	104.227	103.653	108.766	105.171	119.218	102.595	92.2299	17.2341	18.0947
b9d2	62.265	67.4368	61.1757	65.0984	67.9506	70.2914	70.6786	63.6666	72.0597	68.479	56.7339	60.4483	60.0577	58.5048	33.714	31.6546	16.3148	16.2255
baalc	0	0	0	0	0	0	0	0	0	0	0	0	0	0	0	0	0	0.0623441
baat	0	0	0	0	0	0	0	0	0	0	0	0.0883574	0.0924684	0	0.150823	0	0	0
babam1	39.1142	31.4197	39.2406	42.9308	46.2526	45.7439	52.0562	50.5564	38.1766	43.2617	52.868	49.8192	47.4475	44.7389	43.3071	45.8751	6.00431	6.98059
babam2	31.1906	30.2002	31.1057	30.8922	29.4798	24.0556	27.7978	20.9879	25.4533	24.5412	0.366391	0.64394	0.898535	0.267222	0.183197	0.765503	15.0092	16.0645
bace1	0.761284	1.1595	1.03529	1.28848	0.458623	1.06752	0.801348	1.06721	1.50789	1.23783	1.28551	0.458412	0.47974	0.489167	0.558922	0.18684	1.66517	1.55832
bace2	7.07715	7.95542	8.53723	8.30289	13.8531	15.2199	19.6871	14.5212	29.1648	29.0218	42.1391	43.5817	45.4107	44.3273	29.9028	35.6907	82.2877	75.0337
bach1	31.834	34.0323	34.2352	34.5432	42.8588	41.629	41.9646	40.2887	51.8084	54.4721	52.0343	51.6803	37.3443	35.6466	2.80052	6.478	1.9555	2.27136
bach2	3.31124	3.59047	4.12873	4.72873	5.91014	6.69478	6.43333	6.19341	8.46697	8.94087	5.62224	5.87465	4.75889	4.93692	0.77621	1.15712	0.781259	0.679242
bad	19.1599	19.1887	21.5905	23.1916	30.4414	30.665	39.2816	36.8139	40.5354	43.2852	43.631	45.412	38.4515	41.5074	4.6925	5.8824	0.784144	0.730447
baf-l	19.9023	17.4724	26.6945	26.8468	23.5075	26.7749	26.2977	31.1738	62.4348	58.5969	42.1339	41.6308	48.9655	48.9231	46.5363	42.0445	45.2777	35.9152
bag1	46.0215	47.906	48.7023	51.4872	57.1352	56.7064	63.2996	55.8026	55.4717	58.1546	56.0083	60.0093	49.2186	62.2113	32.5472	34.4294	5.63938	6.38061
bag2	0	0	0.556395	0	0	0.14343	0.430669	0.397075	0.972463	0	0	0.633508	0.662983	0.175262	0.360458	0.30124	4.92202	4.70075
bag3	3.08938	3.33299	3.33666	3.8908	3.46223	4.55639	4.51388	3.64692	1.04026	1.35698	13.9629	13.6904	9.95755	12.6692	3.15482	4.49187	0.870279	0.893253
bag4	12.1292	12.2047	14.4817	14.1389	19.8836	18.7869	22.7536	21.4899	31.6251	32.1298	43.8496	43.9021	43.9889	48.6203	24.854	26.9028	14.6883	13.9284
bag5	19.6135	20.8578	21.3225	22.3942	23.1956	23.8649	25.5573	23.3711	25.0492	27.9575	34.8836	38.4139	37.4139	32.5622	15.6496	15.6359	0.868235	1.02221
bag6	13.424	10.2838	14.9595	14.6911	20.2551	19.3469	24.8919	21.3217	35.7404	39.0626	52.4812	48.7888	68.0281	63.0952	80.7345	88.6117	104.757	100.644
bahcc1	11.1534	10.2093	11.6645	11.1353	19.8748	19.3591	22.5514	21.115	29.9264	32.1125	46.6428	47.1296	25.5945	25.2886	23.3843	35.8064	54.2381	56.7709
bahd1	0.885772	0.788191	0.885444	0.783637	1.88277	1.19522	1.79441	1.76167	3.38777	2.86193	2.23193	2.90839	2.66005	2.29214	0.688356	1.11568	6.36987	5.14037
baiap2	42.4449	38.5739	41.3777	42.3321	42.3005	44.1354	42.2979	43.0978	40.6891	39.679	49.6858	49.9349	44.5027	44.6018	12.9893	13.4805	2.08141	2.29066
baiap2l1	13.1311	9.91938	11.9719	14.2297	17.5518	18.8843	21.3648	21.3595	41.1264	39.7252	51.8443	47.6548	44.6075	44.445	11.4492	11.8832	37.1934	32.345
baiap2l2	0	0.12164	0.0633555	0.0700887	0.0748422	0.065328	0.130771	0	0.177171	0.0443415	0.0820884	0	0	0	0	0.137206	0	0.0738294
baiap3	1.08915	1.5705	1.08472	0.983604	0.90327	0.916794	1.00936	0.96447	0.360524	0.522711	0.599043	0.215965	0.452027	0.76178	0.0230403	0.308082	0.74363	1.11899
bak1	0.468412	0.630044	1.18956	0.635301	1.21141	1.09971	1.05834	1.05385	1.40518	1.00481	1.70073	1.93044	1.75958	1.65387	0.744075	1.42134	0.329879	0.143402
bambi	598.267	566.343	555.73	554.474	508.573	500.974	469.621	450.509	409.305	403.594	321.444	308.858	262.436	251.134	531.165	479.307	292.698	278.95
banf1	544.559	530.282	536.414	555.8	530.554	518.047	486.384	509.537	457.512	453.399	448.793	471.553	445.191	481.356	592.341	530.962	675.136	706.039
bank1	0	0	0	0	0	0	0	0	0	0	0	0	0	0	0	0	0	0
banp	41.7233	36.5159	48.7484	55.6394	74.2825	76.3955	90.8211	94.9786	100.93	100.925	90.6305	93.7021	97.974	100.724	50.144	56.7915	32.0556	33.0681
bap1	103.135	104.397	124.402	117.732	126.525	128.746	132.015	124.193	147.909	143.121	183.595	173.616	186.697	187.737	181.113	169.396	127.13	118.166
bard1	25.3093	22.1096	28.011	26.9997	39.4012	41.2387	49.4391	51.0615	83.0826	82.8471	66.2018	62.1326	65.1471	65.4235	18.4156	23.31	19.6899	20.6732
barhl1	0	0	0	0	0	0	0	0	0	0	0	0	0.299833	0.554834	0	0.544942	8.09446	6.45103
barhl2	0.050151	0.278257	0.289857	0.160331	0.171205	0	0.19943	0.551621	0	0.169055	0.438155	0.733397	1.30478	0.973905	0.125188	0	1.94254	2.64591
barx1	0.464221	0.257568	0.581327	0.445229	0.792376	0.414987	0.923009	0.553157	0.844094	0.500753	1.44849	1.62928	0.497317	1.52127	0.2897	0.387371	0.359621	0.416882
barx2	0	0	0	0	0	0	0	0	0	0	0	0	0.082224	0.0652087	0	0.112081	0	0.0301548
basp1	0	0	0	0	0	0	0	0	0	0	0	0	0	0	0.96654	1.077	4.53266	5.11915
batf	0	0	0	0	0	0	0	0	0	0	0	0	0.41142	0.244711	0.335527	0	0.416509	1.05619
batf2	0.502225	0.41282	0.59129	0.594664	1.07949	1.10854	0.887619	1.35544	2.68697	1.99393	2.43766	2.32573	2.90365	2.20118	1.11437	1.68797	3.32863	3.00673
batf3	0.0751828	0	0	0	0	0	0	0.0689125	0	0	0	0	0	0	0.0938364	0	0	0
bax	100.807	112.031	125.139	120.432	149.135	153.283	161.698	156.543	214.075	224.056	221.165	238.696	241.157	243.597	144.159	194.219	88.475	100.102
baz1a	24.205	24.9891	33.0804	30.8227	40.868	44.5691	46.7151	45.7944	68.7633	70.7387	60.8025	69.7715	49.0463	59.2068	24.7029	30.6251	54.4254	55.0039
baz1b	133.486	140.468	129.707	130.667	117.347	124.217	103.197	101.823	131.383	134.85	64.9444	70.3026	55.862	54.5029	53.933	69.1237	84.8466	89.6036
baz2a	137.73	146.924	155.469	150.55	196.295	203.177	199.273	194.772	248.288	256.736	238.355	240.172	255.872	244.252	91.6493	126.659	78.0759	78.1398
baz2b	0.251151	0.450832	0.355777	0.425075	0.453904	0.469573	0.411239	0.28437	0.218882	0.308763	0.147511	0.129627	0.0904389	0.251033	0.129073	0.0924589	4.05143	3.33334
bbc3	0	0.0838676	0.0873638	0.193297	0.206407	0.900838	0.721307	0.665042	2.25987	2.44578	3.84865	4.50939	2.4984	2.862	1.58475	2.2704	0.140517	0.203614
bbip1	0.717995	0.663952	1.38326	0	0	0.713163	0	1.31623	0.48353	0.484061	2.6884	1.04998	7.69183	0.871442	23.2996	16.4762	30.0355	29.8209
bbof1	0.0676291	0	0	0	0	0	0	0	0.273267	0	0	0	0	0	0	0	3.77212	3.4162
bbox1	0.415393	0.336111	0.60021	0.276666	0.59086	0.618896	0.722684	0.475937	0.17484	0.175032	0.648067	0.455596	0.794656	0.56719	0.194421	0.324962	2.25256	2.1566
bbs1	52.9212	59.4245	52.3195	48.5936	46.32	48.02	40.8629	44.7874	41.8295	40.7756	48.123	45.038	28.8647	28.9282	1.63887	1.90918	3.8839	4.77925
bbs10	30.0438	32.4838	34.3033	35.5955	49.1351	47.2988	54.1558	55.8144	82.0469	84.1067	101.411	106.845	91.572	101.995	18.1748	21.0678	2.06724	1.96256
bbs12	8.91532	10.6565	8.96964	10.0637	9.76926	7.937	9.38837	9.62455	11.8745	12.0879	22.2957	21.8742	17.3332	20.1986	4.49214	4.95961	3.32534	2.81699
bbs2	7.64729	6.18772	8.9779	7.8947	12.9443	12.2008	16.1079	15.64	16.8663	17.046	16.1662	14.3984	13.1665	13.1103	2.2072	2.69211	7.18305	8.20875
bbs4	17.3282	14.8316	16.4932	16.872	14.6126	16.5968	17.3806	16.4502	22.5403	22.8432	22.979	21.2678	18.5477	17.8392	1.80229	2.68965	9.02903	7.64161
bbs5	30.6981	30.8004	29.423	29.4422	30.8278	29.9579	25.8644	24.1283	33.181	30.1647	27.9695	29.5167	29.4806	29.9002	8.52502	12.9682	16.0522	16.196
bbs7	20.7772	20.7763	16.9168	18.9783	20.6876	19.8184	17.9097	17.9108	15.3804	16.1755	20.8897	21.2809	17.9809	17.4122	5.09384	6.794	8.43102	8.56103
bbs9	25.9527	26.6658	23.7687	23.8852	22.5221	26.071	21.2401	23.0373	23.6346	22.6222	29.5696	30.3813	27.1309	23.6642	10.1838	8.9551	3.60467	3.49445
bbx	0.319188	0.23613	0.322841	0.289122	0.254249	0.253632	0.301454	0.643649	1.03179	0.903804	1.27481	1.447	1.75857	2.24694	1.01587	1.36503	5.5635	5.26698
bc014685	25.4499	23.5343	27.6355	25.3949	38.596	39.1589	43.8857	39.6141	68.9926	71.8761	57.1176	59.8185	55.0951	58.6889	20.2714	26.0633	44.2342	42.0213
bcam	0.0996831	0.023045	0.144034	0.0796708	0.0283581	0.0990123	0.222974	0.182739	0.0839138	0.084006	0.497659	0.546654	0.228835	0.302467	0.186623	0.155964	22.4716	21.2885
bcan	0	0	0	0	0	0	0	0	0	0	0	0	0	0	0	0	0.276316	0.166829
bcap29	17.2571	16.4241	17.2301	17.5176	14.6563	15.577	14.5263	18.127	16.1601	15.2861	18.9445	17.0852	14.7475	16.3204	11.2803	11.7593	2.97623	4.17125
bcap31	26.4707	21.9584	33.3733	31.5272	58.8038	60.5115	82.914	81.8877	148.118	145.525	146.971	131.785	165.172	160.167	144.057	152.671	133.742	131.747
bcar1	2.60594	2.0519	2.83335	2.52957	4.52146	4.71551	5.64309	5.2975	7.69748	9.01055	16.198	15.2435	14.1758	13.6849	7.79312	9.79618	17.909	19.2024
bcar3	74.5398	72.4751	73.2858	74.264	89.5149	88.1764	79.3885	83.8996	90.9676	88.1298	74.4339	74.5111	61.3509	62.5111	10.2606	10.302	9.90157	9.16296
bcas1	0.0327519	0	0	0	0	0	0	0	0	0	0	0	0	0	0	0	0	0
bcas2	162.013	154.359	139.448	143.663	144.045	138.518	143.521	128.19	130.017	123.451	244.771	243.134	248.557	218.863	305.055	282.62	121.499	112.753
bcas3	21.5601	24.0528	20.2012	19.2847	22.3465	18.9553	20.3321	18.4604	21.7268	20.9451	20.5331	19.4998	19.0555	17.2981	9.66143	11.3075	1.10005	0.933082
bcas4	0	0.0670095	0	0	0	0	0	0	0.268402	0.122135	0.316548	0.317908	0.38815	0.835529	0.226107	0.377923	0.0561359	0.0406714
bcat1	0	0.0383172	0	0	0	0.123472	0.0411936	0.0759606	0.0558098	0.0279356	0.0517165	0	0.190244	0	0.413735	0.345765	13.0324	11.7679
bcat2	11.0032	12.2221	11.2891	11.9338	19.2629	18.1722	21.2951	20.8276	30.6049	29.0144	35.5925	34.1812	35.1737	33.1104	32.1797	27.5722	24.5126	28.2841
bccip	25.4625	23.546	26.1412	27.7591	43.6525	38.9351	50.8769	52.2056	59.4526	61.6637	59.0646	58.181	69.861	70.6529	78.4048	71.1156	81.626	80.6703
bcdin3d	28.9591	28.4393	28.2416	27.9274	32.9534	33.1621	43.8983	38.4997	47.3054	50.2617	48.5405	58.6239	44.6859	53.3032	30.3193	28.4588	14.0907	15.1791
bche	0	0	0	0	0	0	0	0	0.0545848	0	0	0	0	0	0	0	0	0
bchel	0.0339032	0	0	0.0722583	0	0.0336751	0.0337048	0	0.0456639	0.022857	0	0.0991587	0	0	0	0	0	0
bckdha	19.3354	16.0593	19.598	19.2599	22.6917	22.6151	26.0479	24.2011	30.2584	29.8832	31.5046	30.4166	28.7414	27.3891	23.3766	20.2208	28.8622	26.6915
bckdhb	13.6821	14.4252	12.0044	12.0729	16.4618	15.9272	15.4214	15.7362	16.8437	17.6847	24.3642	26.3805	24.2736	22.9525	16.6417	11.0898	5.53588	7.43472
bckdk	138.571	132.001	130.576	132.864	128.023	127.707	120.252	116.37	113.307	113.999	151.846	147.237	144.423	131.355	120.935	120.973	36.8514	37.962
bcl10	0	0	0	0	0	0	0	0	0	0	0	0	0	0	0	0	0	0.0630212
bcl11a	3.65008	4.00153	3.42059	3.41451	3.5897	3.18258	3.54662	2.80067	0.978801	1.20257	2.39121	2.36699	1.64298	1.44331	0.96886	0.620189	1.433	1.48319
bcl11b	0	0	0.0328956	0.0909792	0	0.0847995	0.0169749	0.0156508	0	0.0345347	0.0213111	0	0	0.0414479	0.0639337	0.0356203	0.0793645	0.0766679
bcl2	0.373794	0.561695	0.540102	0.497919	0.691195	0.464098	0.696762	0.599584	0.755188	0.535512	0.758116	1.36657	0.929598	0.680519	0.174951	0.584838	2.53373	1.83573
bcl2l1	4.99712	5.16463	8.11709	6.05611	6.13235	7.88319	8.96165	8.2626	12.5373	10.6354	12.107	7.45096	12.1463	12.2491	26.9045	20.2361	24.2895	23.4275
bcl2l10	0	0	0.179127	0	0.282139	0.123136	0.308112	0.0568156	0.125231	0.167158	0.773639	0.362583	1.99213	1.50465	0.0773644	0.258619	1.0564	2.15699
bcl2l11	1.40686	1.44136	1.76469	1.63945	1.33601	1.85984	1.71056	1.92038	1.49274	1.7605	2.56439	1.96856	2.21505	2.32175	0.568464	0.612318	2.46199	2.57906
bcl2l12	71.4696	76.1819	78.8559	79.9645	82.2165	81.2075	81.7194	84.6079	74.5993	77.6488	81.4321	86.233	81.4757	77.0072	29.6148	35.9154	18.1593	19.6181
bcl2l13	10.4245	9.45009	12.8486	13.4269	20.0819	20.301	25.9495	25.1291	53.3987	51.7141	62.7492	59.4178	61.3029	59.2769	19.9774	22.4318	7.0582	7.50943
bcl2l14	37.4085	34.7945	36.35	37.4238	49.0837	45.498	54.2664	48.234	61.5124	60.2932	63.4325	61.9622	52.5771	47.1902	6.4658	9.21452	13.3491	11.4468
bcl2l2	19.0099	22.022	18.1106	18.0318	17.9869	17.1528	18.3448	18.9562	25.5573	25.867	17.0342	15.3763	18.01	17.8326	13.2103	17.2864	14.5646	12.3501
bcl3	0	0	0	0	0	0	0	0	0	0	0	0	0.0698164	0	0.170813	0.0951677	0.14136	0
bcl6	21.128	18.438	18.5372	19.0095	22.3726	23.2102	22.0638	21.3478	35.5922	36.0998	25.0399	24.3925	14.4419	15.0711	0.944543	1.80427	0.335004	0.381411
bcl7a	181.516	185.235	200.029	211.315	236.479	238.549	250.63	268.718	265.507	271.781	257.764	254.473	268.782	288.065	267.331	296.369	145.365	140.366
bcl7b	7.51863	7.26589	8.87375	9.45591	13.1804	12.3794	18.7876	18.005	20.1623	20.4128	31.7028	27.9334	26.3305	25.2389	3.12803	3.81524	3.35827	2.66123
bcl7c	0	0	0	0	0	0	0	0	0.0674693	0	0	0.0732545	1.2266	1.03357	4.93918	2.4035	3.18206	2.53037
bcl9	60.9509	54.9132	49.1468	48.0289	68.0767	71.1233	74.8434	68.3788	134.08	136.938	140.755	145.224	134.813	128.874	60.0408	111.342	86.8658	86.1784
bcl9l	2.31067	1.69683	2.33493	1.68987	2.65516	2.52014	2.09446	2.11796	2.77659	2.65746	1.83782	1.55703	1.00542	0.962328	0.226194	0.425327	0.105295	0.305153
bclaf1	306.152	310.131	279.24	288.049	251.407	244.358	221.101	232.331	174.908	181.371	172.114	174.954	174.104	170.8	138.228	138.969	51.4594	58.2075
bclaf3	83.0178	76.968	79.1817	83.561	89.571	89.6833	91.3456	91.4786	83.2677	83.3591	87.5542	99.6905	85.294	90.9399	44.8517	50.2769	29.1387	25.7492
bco1	0.389275	0.299978	0.624967	0.967942	0	0.193327	0.128999	0	0.0436925	0	0.161952	0.664144	2.97876	2.67732	0.64781	0.676732	0.301561	0.291315
bco2	1.29293	1.19561	0.778409	0.861135	1.40996	2.46144	3.05274	2.51834	3.26519	3.81357	3.42913	3.15126	2.88564	3.33465	3.22744	2.02292	4.17334	4.11217
bco2l	0.0394022	0	0	0.0419891	0	0	0	0	0	0	0	0	0	0	0	0	0	0.0442301
bcor	21.3881	21.2522	27.2613	25.7561	38.5523	40.7112	47.8294	44.9781	79.5324	76.67	88.2441	92.5241	67.5065	72.014	32.602	40.9878	64.7128	64.8875
bcorl1	6.27667	6.57485	8.35194	7.74687	9.05915	8.89375	7.98501	9.01984	8.72862	8.7143	9.82561	10.3197	10.2572	11.1689	15.8007	17.4586	29.7787	29.1981
bcr	7.99629	8.32135	8.31712	8.47273	13.0137	12.9207	12.7056	15.8699	20.1901	20.8267	14.1884	15.2916	13.1442	14.9311	6.4829	9.88523	32.2962	31.7103
bcs1l	26.7786	20.6579	26.7609	23.8061	33.9757	34.2793	33.7401	36.5554	43.3489	45.1343	33.8693	32.0404	39.9963	40.5836	20.286	20.3141	11.6481	12.2168
bdh1	1.31752	1.67169	1.65283	1.43667	1.81303	1.36952	1.94948	2.44336	3.65227	3.49102	5.81275	6.04896	4.92365	6.35917	2.60046	2.365	0.712079	1.34137
bdh2	30.2872	31.6523	31.1733	28.9597	27.2649	26.4775	25.5728	28.0464	12.6432	14.4752	12.169	8.34254	9.36566	9.94535	6.86128	8.65522	17.9988	17.8142
bdkrb2	0.291642	0.154109	0.200666	0.266391	0.284458	0.413828	0.372774	0.152754	0.420868	0.561773	1.976	1.21855	1.40277	2.27553	0.728004	0.17383	1.35557	2.10457
bdnf	0	0	0	0	0	0	0	0	0	0	0	0	0	0	0	0	0	0
bdp1	24.9943	23.8197	21.6983	22.7264	29.3113	31.2603	28.0388	27.5004	30.0859	31.72	21.423	22.3502	14.178	14.5972	4.09388	8.75565	6.92167	6.04423
bean1	0	0	0.102717	0	0	0	0	0	0	0	0	0	0	0	0	0	0	1.07729
becn1	17.8689	17.7861	20.3804	17.323	20.6865	21.323	22.2671	23.7717	23.7331	24.1357	19.2821	21.413	16.4271	14.835	9.83471	9.96638	20.091	20.2673
begain	4.81301	4.74594	5.88996	6.90846	6.00778	7.17093	8.44671	7.65278	1.07492	1.30788	7.53956	8.00802	5.71234	5.00711	0.704923	0.61473	0.114138	0.11026
bend2	27.7302	27.8082	29.2328	31.3121	44.0934	45.5563	51.5301	52.392	70.525	71.3762	44.466	43.909	41.5253	49.7604	7.44925	6.41701	3.69887	3.09218
bend3	11.7982	14.4385	13.8934	13.063	12.4402	13.5465	14.527	12.8481	11.8271	11.4387	17.326	16.8182	15.53	17.177	21.2101	24.782	27.5032	29.4038
bend4	0.788044	1.23323	2.21893	2.13175	1.51756	1.98696	2.1695	2.77816	3.8374	4.04595	1.13488	0.886475	1.39158	2.42794	1.13488	0.885211	2.72367	2.04139
bend5	79.1488	73.9472	86.9808	85.3748	98.1843	96.6277	107.131	100.545	75.0737	80.367	105.743	98.2478	94.4023	100.755	90.2528	82.0148	53.0817	49.3037
bend7	0	0	0	0	0	0	0.0547668	0	0.0370995	0	0	0	0	0	0	0	0.0853524	0
best1	0	0.11227	0	0.0646897	0.069077	0	0	0.0556414	0.163524	0.0409258	0	0	0	0	0	0	0	0
best2	135.564	133.128	136.538	136.541	118.883	122.567	119.076	122.797	107.161	100.378	95.8664	91.9214	85.7065	93.4595	166.728	172.824	101.427	98.3062
best3	0.598132	0.671634	0.370394	0.500816	0.388932	1.01847	0.552158	0.509087	0.374037	0.835306	0.373265	0.374869	0.457696	0.311126	0.0533239	0	0.066194	0.239793
best4	0	0.050448	0	0	0	0	0	0	0	0	0	0	0.333964	0.331067	0.272359	0.45523	0.591666	0.489911
bet1	9.45292	7.51214	11.9514	10.0735	16.8074	19.3654	22.1725	19.766	23.4747	21.8076	12.72	13.8237	11.3023	10.5768	0.553045	1.54063	6.17873	5.63719
bet1l	86.0659	90.3344	96.6961	95.2463	81.9015	84.2599	73.5065	85.9894	66.2407	69.4171	118.14	110.836	80.2501	86.5385	16.9573	16.1626	28.3567	29.4939
bfar	307.865	350.062	310.48	321.41	307.268	299.06	279.996	283.554	243.749	258.832	218.76	235.728	199.386	210.472	113.518	111.107	15.6958	19.2318
bfsp1	0	0	0	0	0	0	0	0	0	0	0	0	0	0	0	0	0.0850262	0.0616029
bfsp2	0	0	0	0	0	0	0	0	0	0	0	0	0	0	0	0	0	0
bglap	0	0	0	0	0.107504	0.0938373	0.281761	0.086594	0.508979	0.127385	0.589561	0.138155	0.289167	1.49062	0.589564	0.59125	0.439116	0.530244
bglap2	0	0	0	0	0	0	0	0	0	0	0	0	0	0	0	0	0	0
bgn	0	0	0.0869368	0.192352	0	0.0896435	0	0	0.121558	0	0	0	0	0	0	0	1.95762	0.607855
bhlha15	0	0.0631333	0.394591	0.436527	0.0776888	0.135625	0.407236	0.0625782	0.459775	0.46028	0.170421	0.199679	0	0.0828629	0	0	0	0
bhlha9	0	0	0	0	0	0	0	0	0	0	0	0	0	0	0	0	0	0
bhlhe22	0	0	0	0	0	0	0	0	0.0359502	0	0.0666269	0	0.163395	0.323956	1.13266	1.33636	1.48875	1.37824
bhlhe23	0	0	0	0	0	0	0	0	0	0	0	0	0	0	0.29638	0.123845	0	0.0666398
bhlhe40	6.78763	5.0087	4.0287	3.87235	3.90093	3.47313	3.95332	4.77613	3.00122	3.14319	4.0219	2.80738	1.469	1.99715	0.0855728	0.143029	0.956037	1.53926
bhlhe41	0.614206	0.615306	1.1833	0.76362	1.39785	1.57602	1.42476	1.64203	0.068939	0	0	0	0	0	0	0	0.396508	0.114911
bhmg1	0.0695208	0	0	0.0740851	0	0	0	0.0637228	0	0.0468698	0	0	0	0.168757	0.433848	0.870178	0.323136	0.390196
bhmt	0.185822	0	0.357997	0	0.105726	0.0922857	0.738938	0.340649	0.688274	0.438474	0.695775	0.679355	1.70631	1.12767	1.97137	1.74442	0.719758	0.730067
bicc1	393.991	442.896	372.375	372.225	322.576	332.611	305.068	291.855	292.573	274.84	271.968	288.636	274.343	238.519	12.2182	28.3666	19.3655	21.7311
bicd1	0.0166674	0	0.0321108	0	0.0189663	0	0	0.0305547	0.12347	0.0786584	0.0208027	0.0243741	0.0255081	0.0202295	0.416056	0.556327	8.75422	7.98903
bicd2	27.0337	25.7654	26.0206	26.9741	36.204	40.5733	38.5174	35.7077	49.8081	52.9291	49.1259	46.6198	36.4941	37.1706	9.70853	15.7394	31.5123	30.3223
bicd2l	236.3	223.856	219.995	224.425	196.995	192.078	171.768	171.801	185.97	191.494	191.166	211.539	193.175	196.536	120.047	129.926	38.6851	41.694
bicdl1	21.3338	19.5321	23.0002	19.7986	29.9837	34.6973	38.0989	31.8571	43.4345	43.6727	51.887	49.793	41.2445	36.8678	13.2253	18.0526	3.83071	3.88558
bicdl2	0	0	0	0	0	0	0	0	0.0253674	0	0	0	0	0.0457183	0.188056	0.235742	3.4433	3.67867
bicra	18.1891	15.3166	15.428	14.7176	23.94	24.5419	22.5153	22.3967	36.9215	37.4504	30.6977	29.1887	30.4728	30.8483	37.2273	60.9133	55.1156	55.2184
bicral	0.185511	0.274476	0.262092	0.40856	0.450342	0.528219	0.46721	0.521453	0.73293	0.733735	1.0805	1.06706	0.681382	0.375262	0.0463076	0.0774	0.536519	0.527545
bid	13.9718	10.3361	16.3748	14.3928	15.369	14.803	22.6871	17.5023	29.6391	28.7297	26.1574	23.4969	30.2922	24.0235	22.6699	26.2323	9.74124	6.7963
bin1	16.6674	16.0254	18.2282	18.2004	20.5349	21.2675	24.0627	24.8113	26.5001	26.5412	61.5363	63.2519	63.9482	59.2107	47.9513	48.0286	21.3024	19.6943
bin2	0	0	0	0	0	0	0	0	0	0.0707519	0	0	0	0	0.0654912	0	0	0
bin3	27.9269	29.7589	33.1476	31.9541	34.6678	32.9869	34.4827	34.4344	34.426	38.3959	58.3211	58.8012	56.0764	57.1723	45.4325	50.3148	25.3552	24.3781
birc2	1.00263	0.788089	1.49701	0.587652	2.05366	1.79259	3.58835	2.34348	4.2201	4.46132	2.81562	2.5659	5.06367	4.6851	47.4279	42.4599	73.0111	78.1086
birc5	1524.57	1351.11	1437.5	1376.68	1196.47	1259.83	1175.35	1223.82	893.855	858.069	1030.2	1044.48	834.368	875.391	287.372	229.736	6.5206	4.92113
birc5l	294.774	281.892	275.89	306.536	273.543	280.324	251.682	272.573	259.507	249.577	206.181	208.012	220.805	219.576	285.071	256.401	200.062	212.599
birc6	16.8441	17.978	19.8286	20.0101	32.0413	33.8456	32.7892	33.2747	44.746	46.8522	51.6978	48.5766	54.6572	51.6098	21.6843	37.2082	19.7163	19.5024
birc7	74.2189	62.9311	55.3304	56.8029	56.5703	61.1615	51.8276	46.8549	47.4595	45.3544	67.5021	67.9064	43.1173	40.3515	13.2473	11.5594	0.483664	1.75211
bivm	0	0.0276583	0	0	0.0340349	0	0	0	0.0201424	0	0.0746604	0.0437391	0.0457741	0.181508	0	0	2.96578	2.51808
bix1.1	0	0	0	0	0	0	0	0	0	0	0.318363	1.2434	10.5401	8.04937	4.56323	6.56288	0	0
bix1.2	0	0	0	0	0	0	0	0	0	0	1.71061	2.96931	30.8416	25.8147	16.9161	17.4728	0.235943	0.0569815
blcap	321.569	315.485	302.232	299.71	241.285	237.838	220.932	237.233	205.498	191.826	202.584	196.782	194.496	188.891	158.76	147.919	100.733	93.1988
blk	0	0	0.051657	0	0	0	0.106625	0	0	0.0723079	0.133862	0.0784218	0	0	0	0	0.0830858	0
blm	107.465	104.544	89.5452	88.0027	73.3289	75.846	57.7147	57.2244	44.4724	44.8924	35.2498	39.329	32.312	34.9468	35.731	31.8134	23.1157	26.4503
blmh	195.848	208.613	210.103	208.084	218.5	216.608	213.751	217.618	179.626	181.693	210.365	211.68	197.231	210.948	185.403	177.862	96.3014	99.2703
blnk	1.5702	0.614311	2.15246	1.09407	2.26782	2.03951	5.40348	4.04095	9.76098	9.28312	7.68831	6.18213	12.1077	12.9739	12.7386	10.9608	2.15208	1.96597
bloc1s1	2.38144	1.9481	2.47046	2.83062	2.39723	2.27444	5.73665	5.62499	8.69737	11.4857	7.77368	6.42936	8.27045	6.33664	4.91574	3.24831	8.94041	6.88874
bloc1s2	40.4587	36.8846	42.4159	47.8379	40.1826	39.1924	47.6126	40.4915	35.1415	37.0114	26.4081	29.0603	28.0057	26.3746	59.5971	43.5432	16.6126	21.344
bloc1s3	149.617	153.568	141.71	156.626	138.822	136.237	134.271	133.229	125.515	119.446	66.5832	62.7678	68.2785	68.5285	41.488	40.6745	30.5232	25.4584
bloc1s4	402.64	395.628	387.196	392.164	325.911	322.827	328.012	334.3	273.092	262.501	272.884	293.906	262.323	261.377	303.472	239.907	108.391	112.341
bloc1s5	37.1682	38.8878	41.9411	40.8533	59.0918	56.6429	57.1152	67.4554	69.1563	68.0152	47.5826	55.4411	58.5081	58.5162	40.2931	39.8766	4.27786	4.05304
bloc1s6	6.23841	5.67271	6.00934	7.20199	7.09887	9.70774	10.9567	11.7222	19.3256	17.2439	12.1984	13.8364	13.8437	14.3862	14.5343	14.7494	11.5986	12.4883
blvra	33.2516	34.7628	35.0286	37.8785	48.1829	44.6608	52.1096	41.814	94.9227	93.6465	38.8437	31.6192	30.5835	29.4236	10.4265	12.3016	6.85221	7.35487
blvrb	12.5153	11.6913	8.24216	11.5678	9.73651	9.3867	7.99844	9.13036	8.25632	8.17929	17.2142	13.8199	19.1536	20.7699	15.3016	17.3169	10.091	6.45096
blzf1	61.6512	52.5062	59.0208	60.9134	66.3438	66.4527	71.9595	66.8347	95.903	94.1097	84.3567	87.3747	115.086	110.301	218.778	183.71	107.901	108.593
bmerb1	0	0	0	0	0	0	0	0	0	0.0272157	0	0	0	0	0	0	0	0
bmerb1l	0.106457	0.0984443	0.102548	0.567233	0.242282	0.317223	0.317503	0.195157	0.788624	0.933034	0.664348	0.311362	0.488773	1.55051	0.132871	0	0	0
bmf	102.582	122.019	106.301	106.732	101.129	104.604	96.1913	94.6215	104.898	105.502	83.8932	91.231	75.2525	82.7638	27.2178	29.5583	6.33136	6.10909
bmi1	11.7329	10.6525	15.9941	17.5044	20.8359	23.6609	28.6656	27.9613	42.117	43.8651	61.2821	61.1444	59.7995	61.665	33.4591	31.2258	41.9753	39.1922
bmp1	63.2151	66.5502	65.7642	66.2627	64.3641	66.1671	63.8152	61.9269	57.6254	57.7684	89.3426	86.8234	79.0526	78.1965	62.0715	63.2236	43.6572	42.7491
bmp10	0	0	0	0	0	0	0	0	0	0	0	0	0	0	0	0	0	0
bmp15	31.8104	28.4923	25.9053	29.1497	27.6293	30.5278	29.7145	26.1994	30.1157	31.91	26.1807	25.0572	16.9333	22.8481	4.60323	4.96903	0.238094	0.0862514
bmp2	26.5081	27.6555	27.2651	29.2315	30.1091	31.2485	32.5792	32.3074	32.4993	31.0294	20.2387	22.2934	19.1697	23.5113	6.24132	8.30505	17.9777	22.5624
bmp2k	5.75162	5.61282	6.45957	6.94835	7.63073	8.74049	10.6718	10.3495	11.8165	12.7945	16.1436	14.8065	16.0633	15.6988	8.60116	9.51045	1.19091	0.952091
bmp3	1.86886	2.57014	2.03104	1.83837	2.56287	1.47551	4.33516	1.66908	3.61437	3.77988	4.96411	5.18567	3.22683	5.23447	1.85408	2.89903	4.82588	3.87297
bmp4	0.971723	0.898582	1.90952	1.7811	0.796141	1.08101	1.00468	1.38946	0.994691	0.864759	7.27686	8.41248	44.4953	46.1851	100.276	103.952	78.0471	76.617
bmp5	0.0508615	0.0470332	0.0489939	0	0	0	0	0	0.0685049	0	0.253922	0.148758	0.0778394	0.679046	0.507847	0.212208	0.788023	0.970591
bmp6	0	0	0.0529985	0	0	0	0	0	0	0	0	0.160917	0	0	0	0	0.0852434	0.12352
bmp7.1	0	0	0	0	0	0	0	0	0	0	0	0.0939814	0.098354	0	26.8708	34.7235	176.141	158.277
bmp7.2	124.926	125.086	131.312	130.004	128.627	134.082	145.141	153.335	116.829	119.978	165.859	172.822	436.12	418.024	932.973	890.509	52.0941	61.0841
bmp8	0	0	0	0	0	0	0	0	0	0	0	0	0	0	0	0	0.275176	0.19937
bmper	0.193348	0.0255421	0.0532137	0	0.0628617	0	0.0274595	0.0759525	0.0372026	0.0372434	0.137896	0.080785	0.0845437	0.0335242	0.482639	0.921941	12.2821	9.95277
bmpr1a	12.0349	10.6079	12.3811	12.612	19.7355	20.0978	24.3628	25.9117	43.7197	43.2897	32.7645	38.2566	33.387	35.5687	37.8927	50.0612	47.7988	52.5486
bmpr1b	0.0427803	0.474723	0.989025	0.547068	0.486809	0.977324	0.467829	0.705823	1.9879	1.73051	0.64073	0.312805	0.654717	0.675	0.961101	1.33868	39.1724	42.1634
bmpr2	0.317054	0.348163	0.3245	0.401221	0.293138	0.216508	0.413698	0.599387	0.400347	0.761495	0.469913	0.724458	0.606532	0.384813	0.173127	0.206693	3.86842	3.80371
bms1	212.837	222.594	234.287	240.698	257.308	264.871	267.403	275.489	258.593	255.554	266.163	269.506	271.135	274.851	275.167	278.498	99.5359	98.342
bmt2	166.353	170.741	173.044	178.018	188.107	187.398	188.218	186.568	122.204	125.786	114.547	127.357	115.674	117.692	47.1923	52.1279	26.2901	29.7021
bnc1	11.1345	8.84997	11.1086	9.77489	13.3942	15.615	17.7636	16.1835	27.0836	28.7934	19.7535	20.2372	10.3054	12.4522	1.15809	1.27201	0.0410742	0.386866
bnc2	0.0766998	0.241151	0.31031	0.39233	0.104735	0.289498	0.213503	0.182788	0.123967	0.144787	0.114875	0.179463	0.0469531	0.0372367	0.019146	0.0640024	0	0.0344391
bnip1	21.1232	22.0376	25.6853	24.286	29.0622	29.837	32.7627	31.3527	47.1933	46.7395	53.5079	59.7088	47.9491	50.9212	5.46003	5.56256	14.7176	13.5628
bnip2	18.8017	18.9182	21.2161	19.7499	26.9475	28.1906	30.4407	33.4414	34.368	38.3292	36.373	38.9515	33.0906	32.9802	12.9066	19.2379	18.3105	17.0351
bnip3	60.489	59.4644	68.2151	65.2064	52.2216	57.7176	52.7573	56.888	50.7078	50.6455	39.4958	38.5979	35.6258	39.3423	9.43712	10.9538	27.7142	28.0562
bnip3l	35.4302	34.6785	40.8688	37.3388	54.393	61.9887	66.6063	62.9498	93.2549	90.414	109.119	119.259	140.14	147.077	105.767	118.166	38.1568	36.1273
bnipl	148.765	137.401	139.61	145.797	129.875	129.176	124.896	119.205	121.352	124.069	131.249	126.349	70.9449	73.8871	5.57194	7.43168	1.32746	1.51858
boc	0.334383	0.412286	0.348947	0.445421	0.887844	0.941044	1.2466	1.35369	3.54672	3.75727	5.35592	3.99346	7.63355	5.34364	4.90383	7.9639	19.8164	18.6426
bod1	245.318	238.969	213.124	206.433	208.413	193.328	162.569	145.549	113.857	110.286	103.525	105.598	82.0665	73.841	58.7873	58.4015	11.0001	12.1814
bod1l1	16.1425	14.8969	17.8424	18.6231	36.6001	38.5141	44.9564	43.7523	73.5449	76.7011	81.8827	82.7434	71.5848	74.2505	34.0516	51.1682	41.1604	43.7488
bok	0	0	0	0	0	0	0	0	0	0	0	0	0	0	0	0	8.76818	5.96375
bola1	1.93375	1.04312	2.79412	1.88899	3.66746	4.80185	5.92751	5.76055	11.9375	9.66915	12.2687	13.1968	17.0168	17.4071	23.7331	18.1533	9.98687	8.86367
bola2	2.4591	1.01067	4.7376	2.0382	4.04195	4.07091	5.16104	5.76024	12.3285	16.3946	10.9127	12.3867	11.2903	5.96928	79.1178	90.63	94.8267	96.921
bola3	106.481	92.629	101.451	108.869	102.643	103.785	111.143	107.041	120.82	114.009	114.032	115.633	111.352	125.205	118.18	110.547	45.8125	53.5173
bop1	83.031	72.8925	94.2594	89.5754	98.1017	111.508	105.947	105.58	140.845	137.957	130.835	125.323	146.851	141.049	171.93	156.417	77.9493	78.8125
bora	518.391	519.873	461.083	452.413	480.24	468.946	476.175	469.276	453.239	460.857	419.002	431.434	412.84	428.691	210.696	208.505	55.8168	63.4339
borcs5	14.424	14.4054	16.488	14.0389	15.1004	15.1866	18.9283	15.1601	17.2905	20.8103	15.1222	14.906	16.041	16.573	4.20065	6.21869	6.10841	7.12421
borcs6	55.4128	52.8333	57.025	62.3519	48.9564	53.3306	55.9439	57.4163	33.2612	38.7507	52.6224	54.6102	36.8716	33.8365	10.9541	4.30802	6.66567	4.05669
borcs7	79.5318	68.4159	63.9816	60.8014	60.0884	58.8181	53.5703	52.8913	53.6573	55.0761	42.7985	42.4557	34.6188	33.7502	3.59654	4.50853	4.35297	4.44767
borcs8	10.6711	6.07256	6.94071	7.09518	7.16124	7.24739	5.53102	7.69116	4.23814	5.16514	3.52888	3.73458	4.04792	5.97771	5.4641	5.89832	0	0.61429
bpgm	8.61594	6.7734	9.31722	9.38176	11.5408	11.706	14.3537	13.9657	26.4347	23.6623	19.0459	20.5991	17.4616	18.3501	3.51618	4.30984	7.96582	8.09046
bphl	0.980273	1.19656	1.24645	1.08642	1.87401	1.40209	1.48129	1.68921	2.74626	2.48493	2.83848	3.72718	2.6404	3.42654	1.22349	1.55418	0.243006	0.616216
bpi	0.435638	0.581891	0.186507	0.464239	0.330483	0.192314	0.240605	0.0887345	0.651951	0.522133	0.785374	1.06178	0.444472	1.23373	1.02703	0.504888	0.224985	0.10867
bpi.4	0	0	0.0647392	0	0	0	0	0	0	0	0.0838813	0	0.308565	0.244711	0.251646	0.140203	0	0
bpifb2	0	0	0	0	0	0	0	0.140107	0.10294	0.0515263	0.0953896	0	0.350899	0.185523	0.286171	0.159438	0.118413	0.171585
bpnt1	36.5322	38.7873	33.7076	34.7542	33.6073	31.7448	26.8562	29.1661	32.1748	31.3923	104.935	102.345	94.0395	91.5108	73.9556	71.6365	4.12039	5.70872
bptf	22.3319	20.5356	22.6262	22.1422	41.7125	43.676	51.5172	48.1639	80.2528	84.6689	118.341	120.414	109.579	101.412	54.9102	87.0939	123.393	123.024
braf	10.3326	9.43432	8.91706	9.17004	10.0145	13.2416	13.3505	13.6237	18.7022	19.36	16.2321	14.3952	15.6636	13.8859	12.7742	19.2433	20.8569	19.0628
brap	11.3935	11.2314	13.2209	13.6642	17.5006	13.7819	17.3828	18.5429	26.9691	27.1762	28.0181	26.7246	24.2849	27.7482	5.3033	8.15812	2.67992	2.87026
[truncated: 27,286 more rows]

## Sheet: Table S3
Table S3: Differentially expressed genes upon E2f1 MO in X. tropicals early embryos
[truncated: 1,280 more rows]

## Sheet: Table S4
Table S4: Differentially expressed genes upon E2f1 rescue (MO and mRNA co-injection) in X. tropicals early embryos
[truncated: 986 more rows]

[truncated: 4 more sheets: Table S5, Table S6, Table S7, Table S8]
